# Supplementary material for: Novel epigenetic signature, molecular subtypes and insights into IGF2/H19 dysregulation in Wilms tumour revealed by methylomic and transcriptomic profiling
Source: Research Square preprint supplement (doi:10.21203/rs.3.rs-8030860/v1), 2025-11-11
Supplement: Supplementary file 1 [file 159b6c379c29f6bfe5a1e5a8.xlsx]

## Sheet: Table S1_IC1 and IC2 DNA meth
Sample	IC1					IC2
	WT	NNK	NNKs mean+2.5SD	WT vs NNK	Alteration	WT	NNK	NNKs mean-2.5SD	WT vs NNK	Alteration
6	0.675632	0.565144	0.644336	0.0312959	GOM	0.339456	0.443329	0.371845	-0.0323897	LOM
7	0.66058	0.555148	0.644336	0.016244	GOM	0.248894	0.427573	0.371845	-0.122951	LOM
8	0.786463	0.565838	0.644336	0.142127	GOM	0.241302	0.45186	0.371845	-0.130544	LOM
9	0.915399	0.568775	0.644336	0.271063	GOM	0.079965	0.460106	0.371845	-0.29188	LOM
10	0.790137	0.573904	0.644336	0.145801	GOM	0.246323	0.41305	0.371845	-0.125523	LOM
11	0.889187	0.539597	0.644336	0.244852	GOM	0.117874	0.414008	0.371845	-0.253971	LOM
16	0.762884	0.569703	0.644336	0.118548	GOM	0.296773	0.419111	0.371845	-0.0750723	LOM
17	0.704887	0.63632	0.644336	0.0605511	GOM	0.338436	0.551166	0.371845	-0.0334097	LOM
18	0.882717	0.577253	0.644336	0.238381	GOM	0.087608	0.445802	0.371845	-0.284237	LOM
19	0.708679	0.575194	0.644336	0.0643429	GOM	0.307771	0.431482	0.371845	-0.0640742	LOM
23	0.853722	0.606125	0.644336	0.209386	GOM	0.436091	0.418279	0.371845	0.0642455	normal
24	0.735738	0.57589	0.644336	0.0914025	GOM	0.421793	0.443285	0.371845	0.0499479	normal
25	0.829372	0.743327	0.644336	0.185036	GOM	0.392715	0.432345	0.371845	0.0208699	normal
26	0.893636	0.81591	0.644336	0.2493	GOM	0.465225	0.407445	0.371845	0.0933799	normal
27	0.798572	0.589775	0.644336	0.154236	GOM	0.425258	0.451319	0.371845	0.0534128	normal
28	0.708752	0.580959	0.644336	0.0644167	GOM	0.425053	0.480621	0.371845	0.0532079	normal
29	0.893919	0.623434	0.644336	0.249584	GOM	0.387627	0.435092	0.371845	0.0157815	normal
30	0.670815	0.571369	0.644336	0.0264793	GOM	0.458812	0.438086	0.371845	0.0869669	normal
31	0.847584	0.707984	0.644336	0.203248	GOM	0.429927	0.488366	0.371845	0.0580819	normal
32	0.80918	0.733445	0.644336	0.164844	GOM	0.460241	0.446566	0.371845	0.0883954	normal
33	0.65255	0.55942	0.644336	0.00821409	GOM	0.275799	0.431083	0.371845	-0.0960463	LOM
39	0.536915	0.576337	0.644336	-0.10742	normal	0.423067	0.451142	0.371845	0.0512217	normal
40	0.602755	0.563706	0.644336	-0.0415804	normal	0.372161	0.421001	0.371845	0.00031608	normal
41	0.513024	0.55785	0.644336	-0.131312	normal	0.390768	0.448652	0.371845	0.0189222	normal
42	0.63783	0.592862	0.644336	-0.00650594	normal	0.385255	0.44698	0.371845	0.0134091	normal
43	0.56822	0.553637	0.644336	-0.0761156	normal	0.38171	0.444491	0.371845	0.00986507	normal
48	0.605378	0.643231	0.644336	-0.0389572	normal	0.445321	0.426913	0.371845	0.0734754	normal
	Region	Coordinates	NNKs Mean	NNKs SD	2.5 SD	posDeff	negDeff
	IC1	Chr11:2018812-2024740	0.579194	0.0260565	0.0651413	0.644336	0.514053
	IC2	Chr11:2719948-2722259	0.443236	0.0285563	0.0713907	0.514627	0.371845
IC1	Imprinting Centre 1
IC2	Imprinting Centre 2
GOM	Gain of methylation
LOM	Loss of methylation
