# Supplementary material for: Novel epigenetic signature, molecular subtypes and insights into IGF2/H19 dysregulation in Wilms tumour revealed by methylomic and transcriptomic profiling
Source: Research Square preprint supplement (doi:10.21203/rs.3.rs-8030860/v1), 2025-11-11
Supplement: Supplementary file 2 [file 1aa12a75ba8c4fd6e6a7b9a5.xlsx]

## Sheet: Table S7_KEGG enrich DEGs
KEGG analysis of Upregulated DEGs
query	significant	p_value	term_size	query_size	intersection_size	precision	recall	term_id	source	term_name	effective_domain_size	source_order	parents	evidence_codes	intersection
query_1	TRUE	3.12955e-18	140	1415	50	0.0353357	0.357143	KEGG:04110	KEGG	Cell cycle	17860	264	KEGG:00000	KEGG,KEGG,KEGG,KEGG,KEGG,KEGG,KEGG,KEGG,KEGG,KEGG,KEGG,KEGG,KEGG,KEGG,KEGG,KEGG,KEGG,KEGG,KEGG,KEGG,KEGG,KEGG,KEGG,KEGG,KEGG,KEGG,KEGG,KEGG,KEGG,KEGG,KEGG,KEGG,KEGG,KEGG,KEGG,KEGG,KEGG,KEGG,KEGG,KEGG,KEGG,KEGG,KEGG,KEGG,KEGG,KEGG,KEGG,KEGG,KEGG,KEGG	BUB1B,TTK,CCNB2,ESCO2,NDC80,BUB1,PTTG1,FBXO5,SGOL1,CDK1,CHEK1,CDC6,CCNB1,MTBP,MCM6,ORC6,MCM2,SKP2,CDC25C,PRKDC,CCNA2,CDCA5,CCND2,DBF4,HDAC2,CDK4,CCNE2,CHEK2,CDT1,MAD2L1,TP53,CDC20,CDC25A,TRIP13,MCM5,PCNA,MCM7,TGFB2,E2F2,RBL1,PLK1,ORC1,CDK6,CDC7,MCM3,MCM4,TGFB3,CCNE1,CDKN2C,ESPL1
query_1	TRUE	1.76996e-14	5949	1415	614	0.433922	0.103211	KEGG:00000	KEGG	KEGG root term	17860	1		KEGG,KEGG,KEGG,KEGG,KEGG,KEGG,KEGG,KEGG,KEGG,KEGG,KEGG,KEGG,KEGG,KEGG,KEGG,KEGG,KEGG,KEGG,KEGG,KEGG,KEGG,KEGG,KEGG,KEGG,KEGG,KEGG,KEGG,KEGG,KEGG,KEGG,KEGG,KEGG,KEGG,KEGG,KEGG,KEGG,KEGG,KEGG,KEGG,KEGG,KEGG,KEGG,KEGG,KEGG,KEGG,KEGG,KEGG,KEGG,KEGG,KEGG,KEGG,KEGG,KEGG,KEGG,KEGG,KEGG,KEGG,KEGG,KEGG,KEGG,KEGG,KEGG,KEGG,KEGG,KEGG,KEGG,KEGG,KEGG,KEGG,KEGG,KEGG,KEGG,KEGG,KEGG,KEGG,KEGG,KEGG,KEGG,KEGG,KEGG…	MMP16,KIF1A,ELOVL2,ST6GAL2,EPHA3,CENPE,BRIP1,KIF20A,TOP2A,XPOT,BIRC5,THBS4,SGCD,GXYLT2,LMNB1,HMMR,COL13A1,CNTNAP2,BUB1B,KIF15,GPR161,CKAP4,ROBO1,EDA2R,KIF4A,TUBA1B,TTK,LMNB2,RPS2,LAMA4,KIF14,ANTXR1,SIX1,FANCI,MARCKS,COL3A1,MARCKSL1,IGF2,CXCR4,CCNB2,HDAC9,ESCO2,COL5A2,NDC80,CHST11,BUB1,WNT5B,ADCY2,ENAH,TYMS,PTTG1,POMK,FSCN1,KIF11,MMP14,TUSC3,CD276,FBXO5,MAP1B,ZNF519,NCAM1,KIF18A,SGOL1,EZH2,FANCA,C…
query_1	TRUE	3.16083e-09	36	1415	18	0.0127208	0.5	KEGG:03030	KEGG	DNA replication	17860	214	KEGG:00000	KEGG,KEGG,KEGG,KEGG,KEGG,KEGG,KEGG,KEGG,KEGG,KEGG,KEGG,KEGG,KEGG,KEGG,KEGG,KEGG,KEGG,KEGG	MCM6,MCM2,PRIM2,POLE2,RFC2,RFC3,MCM5,RFC4,PCNA,PRIM1,MCM7,RNASEH2A,RNASEH2B,FEN1,MCM3,MCM4,POLE,DNA2
query_1	TRUE	9.8739e-07	413	1415	67	0.0473498	0.162228	KEGG:05200	KEGG	Pathways in cancer	17860	453	KEGG:00000	KEGG,KEGG,KEGG,KEGG,KEGG,KEGG,KEGG,KEGG,KEGG,KEGG,KEGG,KEGG,KEGG,KEGG,KEGG,KEGG,KEGG,KEGG,KEGG,KEGG,KEGG,KEGG,KEGG,KEGG,KEGG,KEGG,KEGG,KEGG,KEGG,KEGG,KEGG,KEGG,KEGG,KEGG,KEGG,KEGG,KEGG,KEGG,KEGG,KEGG,KEGG,KEGG,KEGG,KEGG,KEGG,KEGG,KEGG,KEGG,KEGG,KEGG,KEGG,KEGG,KEGG,KEGG,KEGG,KEGG,KEGG,KEGG,KEGG,KEGG,KEGG,KEGG,KEGG,KEGG,KEGG,KEGG,KEGG	BIRC5,LAMA4,IGF2,CXCR4,WNT5B,ADCY2,FZD10,FZD2,FZD7,RAD51,BRCA2,NOTCH2,SKP2,MSH6,CCNA2,CCND2,HDAC2,CDK4,HEY1,CCNE2,LAMC1,FN1,RUNX1,MSH2,TP53,LEF1,APAF1,ADCY7,PLCB4,GLI3,FAS,MMP2,TGFB2,DDB2,BID,E2F2,IFNAR2,EDNRA,CAMK2D,GLI2,FGFR1,CDK6,FZD3,GNB4,AXIN2,LPAR5,CKS2,CKS1B,TGFB3,GNG2,PTCH2,ADCY1,CCNE1,TCF7,KIF7,CTNNA3,GNG4,IL2RB,CSF1R,WNT9A,PGF,FASLG,RASGRP4,RAC2,FGF18,SPI1,FGF10
query_1	TRUE	1.30024e-06	97	1415	26	0.0183746	0.268041	KEGG:04514	KEGG	Cell adhesion molecules	17860	315	KEGG:00000	KEGG,KEGG,KEGG,KEGG,KEGG,KEGG,KEGG,KEGG,KEGG,KEGG,KEGG,KEGG,KEGG,KEGG,KEGG,KEGG,KEGG,KEGG,KEGG,KEGG,KEGG,KEGG,KEGG,KEGG,KEGG,KEGG	CNTNAP2,CD276,NCAM1,VCAN,LRRC4C,ITGA4,NRXN2,NRXN3,JAM3,CD8A,HLA-DMB,NRXN1,SDC3,CNTNAP1,CD86,NLGN4X,CD8B,CD4,CADM1,CDH2,NLGN3,LRRC4B,SPN,CD28,SELPLG,ITGAM
query_1	TRUE	6.3842e-06	61	1415	19	0.0134276	0.311475	KEGG:04115	KEGG	p53 signaling pathway	17860	269	KEGG:00000	KEGG,KEGG,KEGG,KEGG,KEGG,KEGG,KEGG,KEGG,KEGG,KEGG,KEGG,KEGG,KEGG,KEGG,KEGG,KEGG,KEGG,KEGG,KEGG	CCNB2,CDK1,CHEK1,CCNB1,RRM2,CCND2,CDK4,CCNE2,ZMAT3,CHEK2,TP53,APAF1,FAS,DDB2,BID,CDK6,SESN3,ZNF385A,CCNE1
query_1	TRUE	8.16127e-05	47	1415	15	0.0106007	0.319149	KEGG:05217	KEGG	Basal cell carcinoma	17860	468	KEGG:00000	KEGG,KEGG,KEGG,KEGG,KEGG,KEGG,KEGG,KEGG,KEGG,KEGG,KEGG,KEGG,KEGG,KEGG,KEGG	WNT5B,FZD10,FZD2,FZD7,TP53,LEF1,GLI3,DDB2,GLI2,FZD3,AXIN2,PTCH2,TCF7,KIF7,WNT9A
query_1	TRUE	9.63055e-05	48	1415	15	0.0106007	0.3125	KEGG:03460	KEGG	Fanconi anemia pathway	17860	242	KEGG:00000	KEGG,KEGG,KEGG,KEGG,KEGG,KEGG,KEGG,KEGG,KEGG,KEGG,KEGG,KEGG,KEGG,KEGG,KEGG	BRIP1,FANCI,FANCA,FANCB,FANCD2,RAD51,UBE2T,BRCA2,BLM,BRCA1,EME1,FANCG,FANCL,RMI2,C19orf40
query_1	TRUE	0.000100028	32	1415	12	0.00848057	0.375	KEGG:05150	KEGG	Staphylococcus aureus infection	17860	439	KEGG:00000	KEGG,KEGG,KEGG,KEGG,KEGG,KEGG,KEGG,KEGG,KEGG,KEGG,KEGG,KEGG	C1QB,C1QA,HLA-DMB,C3AR1,C1R,FCGR2A,IL10,PTAFR,C1S,SELPLG,ITGAM,FPR1
query_1	TRUE	0.000579986	112	1415	23	0.0162544	0.205357	KEGG:04934	KEGG	Cushing syndrome	17860	391	KEGG:00000	KEGG,KEGG,KEGG,KEGG,KEGG,KEGG,KEGG,KEGG,KEGG,KEGG,KEGG,KEGG,KEGG,KEGG,KEGG,KEGG,KEGG,KEGG,KEGG,KEGG,KEGG,KEGG,KEGG	WNT5B,ADCY2,FZD10,FZD2,FZD7,SCARB1,CDK4,CCNE2,LEF1,ADCY7,PLCB4,CACNA1C,E2F2,CAMK2D,CDK6,CREB3L1,FZD3,AXIN2,ADCY1,CCNE1,TCF7,WNT9A,CDKN2C
query_1	TRUE	0.000652118	138	1415	26	0.0183746	0.188406	KEGG:04814	KEGG	Motor proteins	17860	366	KEGG:00000	KEGG,KEGG,KEGG,KEGG,KEGG,KEGG,KEGG,KEGG,KEGG,KEGG,KEGG,KEGG,KEGG,KEGG,KEGG,KEGG,KEGG,KEGG,KEGG,KEGG,KEGG,KEGG,KEGG,KEGG,KEGG,KEGG	KIF1A,CENPE,KIF20A,KIF15,KIF4A,TUBA1B,KIF14,KIF11,KIF18A,TUBA1A,TUBB,KIF20B,KIF2A,DNAH2,KIF3C,KIF5C,KIF2C,MYO15A,KIF26B,MYO9B,KIF21B,DYNC1I1,KIF7,KIF24,KIF5A,ACTA2
query_1	TRUE	0.000652118	122	1415	24	0.0169611	0.196721	KEGG:04060	KEGG	Cytokine-cytokine receptor interaction	17860	253	KEGG:00000	KEGG,KEGG,KEGG,KEGG,KEGG,KEGG,KEGG,KEGG,KEGG,KEGG,KEGG,KEGG,KEGG,KEGG,KEGG,KEGG,KEGG,KEGG,KEGG,KEGG,KEGG,KEGG,KEGG,KEGG	EDA2R,CXCR4,GDF11,FAS,TGFB2,NGFR,IFNAR2,TNFRSF19,CNTFR,IL34,TGFB3,IL10,CCR1,IL2RB,CD4,CSF1R,IL10RA,TNFSF13B,CCR2,INHBA,TNFSF8,BMP7,FASLG,IL1RN
query_1	TRUE	0.000652118	129	1415	25	0.0176678	0.193798	KEGG:04310	KEGG	Wnt signaling pathway	17860	299	KEGG:00000	KEGG,KEGG,KEGG,KEGG,KEGG,KEGG,KEGG,KEGG,KEGG,KEGG,KEGG,KEGG,KEGG,KEGG,KEGG,KEGG,KEGG,KEGG,KEGG,KEGG,KEGG,KEGG,KEGG,KEGG,KEGG	WNT5B,FZD10,FZD2,FZD7,TBL1XR1,ROR2,VANGL2,NFATC4,CCND2,TP53,LEF1,ROR1,RSPO3,PLCB4,CAMK2D,TLE1,FZD3,AXIN2,PRICKLE1,TCF7,SERPINF1,WNT9A,LGR6,CXXC4,RAC2
query_1	TRUE	0.0010775	135	1415	25	0.0176678	0.185185	KEGG:05202	KEGG	Transcriptional misregulation in cancer	17860	454	KEGG:00000	KEGG,KEGG,KEGG,KEGG,KEGG,KEGG,KEGG,KEGG,KEGG,KEGG,KEGG,KEGG,KEGG,KEGG,KEGG,KEGG,KEGG,KEGG,KEGG,KEGG,KEGG,KEGG,KEGG,KEGG,KEGG	SIX1,CCNA2,CCND2,HDAC2,RUNX1,ETV1,TP53,ETV5,MEIS1,BMP2K,TCF3,DDB2,NGFR,SIX4,ZEB1,CD86,HOXA10,RUNX2,IL2RB,CSF1R,PBX3,CDKN2C,MYCN,SPI1,ITGAM
query_1	TRUE	0.0010775	159	1415	28	0.019788	0.176101	KEGG:05206	KEGG	MicroRNAs in cancer	17860	458	KEGG:00000	KEGG,KEGG,KEGG,KEGG,KEGG,KEGG,KEGG,KEGG,KEGG,KEGG,KEGG,KEGG,KEGG,KEGG,KEGG,KEGG,KEGG,KEGG,KEGG,KEGG,KEGG,KEGG,KEGG,KEGG,KEGG,KEGG,KEGG,KEGG	MMP16,MARCKS,FSCN1,EZH2,PDCD4,NOTCH2,CDC25C,CDCA5,CCND2,HDAC2,CCNE2,BRCA1,STMN1,TP53,CDC25A,VIM,TGFB2,MIR125B1,E2F2,CDK6,SOX4,FZD3,ZEB1,CCNE1,EFNA5,BMF,EFNA4,MIR146A
query_1	TRUE	0.0014875	130	1415	24	0.0169611	0.184615	KEGG:04080	KEGG	Neuroactive ligand-receptor interaction	17860	263	KEGG:00000	KEGG,KEGG,KEGG,KEGG,KEGG,KEGG,KEGG,KEGG,KEGG,KEGG,KEGG,KEGG,KEGG,KEGG,KEGG,KEGG,KEGG,KEGG,KEGG,KEGG,KEGG,KEGG,KEGG,KEGG	CNR1,CHRNA5,GRM7,PATE2,EDNRA,P2RX7,GRIN2B,GRIN2A,HTR7,GPR156,C3AR1,PTGDR,LTB4R,OPRL1,S1PR2,PTAFR,GRID1,P2RY13,OXTR,HRH1,GRIK2,TSHR,GRPR,FPR1
query_1	TRUE	0.00154349	107	1415	21	0.014841	0.196262	KEGG:04114	KEGG	Oocyte meiosis	17860	268	KEGG:00000	KEGG,KEGG,KEGG,KEGG,KEGG,KEGG,KEGG,KEGG,KEGG,KEGG,KEGG,KEGG,KEGG,KEGG,KEGG,KEGG,KEGG,KEGG,KEGG,KEGG,KEGG	CCNB2,BUB1,ADCY2,PTTG1,FBXO5,SGOL1,CDK1,CCNB1,CDC25C,AURKA,CCNE2,PPP1CC,MAD2L1,CDC20,ADCY7,CAMK2D,PLK1,FBXO43,ADCY1,CCNE1,ESPL1
query_1	TRUE	0.00154349	63	1415	15	0.0106007	0.238095	KEGG:04974	KEGG	Protein digestion and absorption	17860	405	KEGG:00000	KEGG,KEGG,KEGG,KEGG,KEGG,KEGG,KEGG,KEGG,KEGG,KEGG,KEGG,KEGG,KEGG,KEGG,KEGG	COL13A1,COL3A1,COL5A2,COL5A1,COL6A3,ELN,COL8A2,COL16A1,COL6A2,COL1A2,COL14A1,COL24A1,COL5A3,COL11A2,COL9A3
query_1	TRUE	0.00193304	65	1415	15	0.0106007	0.230769	KEGG:05322	KEGG	Systemic lupus erythematosus	17860	484	KEGG:00000	KEGG,KEGG,KEGG,KEGG,KEGG,KEGG,KEGG,KEGG,KEGG,KEGG,KEGG,KEGG,KEGG,KEGG,KEGG	HIST1H2BN,HIST1H2BJ,C1QB,HIST1H2BK,GRIN2B,C1QA,GRIN2A,HLA-DMB,H2AFY2,C1R,CD86,FCGR2A,IL10,C1S,CD28
query_1	TRUE	0.00193304	110	1415	21	0.014841	0.190909	KEGG:05224	KEGG	Breast cancer	17860	475	KEGG:00000	KEGG,KEGG,KEGG,KEGG,KEGG,KEGG,KEGG,KEGG,KEGG,KEGG,KEGG,KEGG,KEGG,KEGG,KEGG,KEGG,KEGG,KEGG,KEGG,KEGG,KEGG	WNT5B,FZD10,FZD2,FZD7,BRCA2,NOTCH2,CDK4,HEY1,BRCA1,TP53,LEF1,DDB2,E2F2,FGFR1,CDK6,FZD3,AXIN2,TCF7,WNT9A,FGF18,FGF10
query_1	TRUE	0.00193304	38	1415	11	0.00777385	0.289474	KEGG:03440	KEGG	Homologous recombination	17860	240	KEGG:00000	KEGG,KEGG,KEGG,KEGG,KEGG,KEGG,KEGG,KEGG,KEGG,KEGG,KEGG	BRIP1,RAD51,XRCC2,BRCA2,TOPBP1,BLM,BARD1,BRCA1,EME1,XRCC3,RAD54L
query_1	TRUE	0.00243887	260	1415	38	0.0268551	0.146154	KEGG:04151	KEGG	PI3K-Akt signaling pathway	17860	285	KEGG:00000	KEGG,KEGG,KEGG,KEGG,KEGG,KEGG,KEGG,KEGG,KEGG,KEGG,KEGG,KEGG,KEGG,KEGG,KEGG,KEGG,KEGG,KEGG,KEGG,KEGG,KEGG,KEGG,KEGG,KEGG,KEGG,KEGG,KEGG,KEGG,KEGG,KEGG,KEGG,KEGG,KEGG,KEGG,KEGG,KEGG,KEGG,KEGG	THBS4,LAMA4,IGF2,COL6A3,CCND2,CDK4,CCNE2,LAMC1,FN1,BRCA1,PDGFC,TP53,ITGA4,NGFR,IFNAR2,FGFR1,VWF,CDK6,CREB3L1,COL6A2,COL1A2,GNB4,LPAR5,GNG2,EIF4EBP1,CCNE1,EFNA5,GNG4,IL2RB,CSF1R,PGF,EFNA4,GDNF,FASLG,FGF18,FGF10,BDNF,COL9A3
query_1	TRUE	0.00244782	17	1415	7	0.004947	0.411765	KEGG:05320	KEGG	Autoimmune thyroid disease	17860	482	KEGG:00000	KEGG,KEGG,KEGG,KEGG,KEGG,KEGG,KEGG	FAS,HLA-DMB,CD86,IL10,CD28,FASLG,TSHR
query_1	TRUE	0.00344797	158	1415	26	0.0183746	0.164557	KEGG:04360	KEGG	Axon guidance	17860	305	KEGG:00000	KEGG,KEGG,KEGG,KEGG,KEGG,KEGG,KEGG,KEGG,KEGG,KEGG,KEGG,KEGG,KEGG,KEGG,KEGG,KEGG,KEGG,KEGG,KEGG,KEGG,KEGG,KEGG,KEGG,KEGG,KEGG,KEGG	EPHA3,ROBO1,CXCR4,WNT5B,ENAH,NFATC4,PLXNC1,EPHB2,FYN,RGMA,LRRC4C,BOC,LIMK1,ROBO2,PAK3,CAMK2D,EPHB3,FZD3,EFNB3,EFNA5,UNC5B,SLIT2,EFNA4,BMP7,RAC2,UNC5C
query_1	TRUE	0.00344797	48	1415	12	0.00848057	0.25	KEGG:04640	KEGG	Hematopoietic cell lineage	17860	333	KEGG:00000	KEGG,KEGG,KEGG,KEGG,KEGG,KEGG,KEGG,KEGG,KEGG,KEGG,KEGG,KEGG	ITGA4,CD1D,CD8A,HLA-DMB,CD8B,CD7,CD4,CSF1R,CD33,CD36,ITGAM,CD1C
query_1	TRUE	0.00425237	178	1415	28	0.019788	0.157303	KEGG:05166	KEGG	Human T-cell leukemia virus 1 infection	17860	447	KEGG:00000	KEGG,KEGG,KEGG,KEGG,KEGG,KEGG,KEGG,KEGG,KEGG,KEGG,KEGG,KEGG,KEGG,KEGG,KEGG,KEGG,KEGG,KEGG,KEGG,KEGG,KEGG,KEGG,KEGG,KEGG,KEGG,KEGG,KEGG,KEGG	BUB1B,CCNB2,ADCY2,PTTG1,CHEK1,NFATC4,CCNA2,CCND2,CDK4,CCNE2,CHEK2,MAD2L1,TP53,CDC20,ADCY7,TGFB2,TCF3,E2F2,CREB3L1,HLA-DMB,TGFB3,ADCY1,CCNE1,IL2RB,CD4,CDKN2C,ESPL1,SPI1
query_1	TRUE	0.00434722	64	1415	14	0.00989399	0.21875	KEGG:04512	KEGG	ECM-receptor interaction	17860	314	KEGG:00000	KEGG,KEGG,KEGG,KEGG,KEGG,KEGG,KEGG,KEGG,KEGG,KEGG,KEGG,KEGG,KEGG,KEGG	THBS4,HMMR,LAMA4,COL6A3,LAMC1,FN1,CD47,ITGA4,SV2A,VWF,COL6A2,COL1A2,CD36,COL9A3
query_1	TRUE	0.00434722	170	1415	27	0.0190813	0.158824	KEGG:04015	KEGG	Rap1 signaling pathway	17860	248	KEGG:00000	KEGG,KEGG,KEGG,KEGG,KEGG,KEGG,KEGG,KEGG,KEGG,KEGG,KEGG,KEGG,KEGG,KEGG,KEGG,KEGG,KEGG,KEGG,KEGG,KEGG,KEGG,KEGG,KEGG,KEGG,KEGG,KEGG,KEGG	ADCY2,ENAH,TIAM1,CNR1,PDGFC,ADCY7,PLCB4,NGFR,EVL,GRIN2B,GRIN2A,FGFR1,MAP2K6,LPAR5,SIPA1L2,ADCY1,EFNA5,APBB1IP,CSF1R,PGF,EFNA4,LCP2,RAC2,FGF18,ITGAM,FGF10,FPR1
query_1	TRUE	0.00497621	172	1415	27	0.0190813	0.156977	KEGG:04020	KEGG	Calcium signaling pathway	17860	250	KEGG:00000	KEGG,KEGG,KEGG,KEGG,KEGG,KEGG,KEGG,KEGG,KEGG,KEGG,KEGG,KEGG,KEGG,KEGG,KEGG,KEGG,KEGG,KEGG,KEGG,KEGG,KEGG,KEGG,KEGG,KEGG,KEGG,KEGG,KEGG	CXCR4,ADCY2,NFATC4,PDGFC,CAMK1D,ADCY7,PLCB4,CACNA1C,EDNRA,CAMK2D,P2RX7,GRIN2B,GRIN2A,FGFR1,HTR7,GNAL,RYR2,ADCY1,PTAFR,CAMK4,OXTR,GDNF,HRH1,FGF18,GRPR,RYR1,FGF10
query_1	TRUE	0.00504609	3	1415	3	0.00212014	1	KEGG:03260	KEGG	Virion - Human immunodeficiency virus	17860	226	KEGG:00000	KEGG,KEGG,KEGG	CXCR4,CD209,CD4
query_1	TRUE	0.00543107	66	1415	14	0.00989399	0.212121	KEGG:05146	KEGG	Amoebiasis	17860	438	KEGG:00000	KEGG,KEGG,KEGG,KEGG,KEGG,KEGG,KEGG,KEGG,KEGG,KEGG,KEGG,KEGG,KEGG,KEGG	LAMA4,COL3A1,LAMC1,FN1,PLCB4,CD1D,TGFB2,COL1A2,GNAL,TGFB3,ADCY1,IL10,ITGAM,CD1C
query_1	TRUE	0.00543107	20	1415	7	0.004947	0.35	KEGG:05143	KEGG	African trypanosomiasis	17860	435	KEGG:00000	KEGG,KEGG,KEGG,KEGG,KEGG,KEGG,KEGG	LAMA4,PLCB4,FAS,TLR9,IL10,FASLG,IDO1
query_1	TRUE	0.00543107	257	1415	36	0.0254417	0.140078	KEGG:05165	KEGG	Human papillomavirus infection	17860	446	KEGG:00000	KEGG,KEGG,KEGG,KEGG,KEGG,KEGG,KEGG,KEGG,KEGG,KEGG,KEGG,KEGG,KEGG,KEGG,KEGG,KEGG,KEGG,KEGG,KEGG,KEGG,KEGG,KEGG,KEGG,KEGG,KEGG,KEGG,KEGG,KEGG,KEGG,KEGG,KEGG,KEGG,KEGG,KEGG,KEGG,KEGG	THBS4,LAMA4,WNT5B,FZD10,FZD2,FZD7,COL6A3,NOTCH2,CCNA2,CCND2,HDAC2,CDK4,HEY1,CCNE2,LAMC1,FN1,TP53,ITGA4,FAS,IKBKE,IFNAR2,RBL1,LLGL1,VWF,CDK6,CREB3L1,COL6A2,COL1A2,FZD3,AXIN2,EIF4EBP1,CCNE1,TCF7,WNT9A,FASLG,COL9A3
query_1	TRUE	0.00543107	131	1415	22	0.0155477	0.167939	KEGG:04218	KEGG	Cellular senescence	17860	295	KEGG:00000	KEGG,KEGG,KEGG,KEGG,KEGG,KEGG,KEGG,KEGG,KEGG,KEGG,KEGG,KEGG,KEGG,KEGG,KEGG,KEGG,KEGG,KEGG,KEGG,KEGG,KEGG,KEGG	CCNB2,CDK1,CHEK1,CCNB1,NFATC4,CCNA2,CCND2,CDK4,CCNE2,CHEK2,PPP1CC,TP53,CDC25A,LIN9,TGFB2,E2F2,RBL1,CDK6,MAP2K6,TGFB3,EIF4EBP1,CCNE1
query_1	TRUE	0.00570941	15	1415	6	0.00424028	0.4	KEGG:05330	KEGG	Allograft rejection	17860	486	KEGG:00000	KEGG,KEGG,KEGG,KEGG,KEGG,KEGG	FAS,HLA-DMB,CD86,IL10,CD28,FASLG
query_1	TRUE	0.00600722	99	1415	18	0.0127208	0.181818	KEGG:05162	KEGG	Measles	17860	443	KEGG:00000	KEGG,KEGG,KEGG,KEGG,KEGG,KEGG,KEGG,KEGG,KEGG,KEGG,KEGG,KEGG,KEGG,KEGG,KEGG,KEGG,KEGG,KEGG	RAB9B,CCND2,CDK4,CCNE2,TP53,APAF1,FAS,IKBKE,TLR7,BID,IFNAR2,CDK6,CD209,CCNE1,TLR9,IL2RB,CD28,FASLG
query_1	TRUE	0.00641572	108	1415	19	0.0134276	0.175926	KEGG:05226	KEGG	Gastric cancer	17860	477	KEGG:00000	KEGG,KEGG,KEGG,KEGG,KEGG,KEGG,KEGG,KEGG,KEGG,KEGG,KEGG,KEGG,KEGG,KEGG,KEGG,KEGG,KEGG,KEGG,KEGG	WNT5B,FZD10,FZD2,FZD7,CCNE2,TP53,LEF1,TGFB2,DDB2,E2F2,FZD3,AXIN2,TGFB3,CCNE1,TCF7,CTNNA3,WNT9A,FGF18,FGF10
query_1	TRUE	0.00901979	28	1415	8	0.00565371	0.285714	KEGG:05144	KEGG	Malaria	17860	436	KEGG:00000	KEGG,KEGG,KEGG,KEGG,KEGG,KEGG,KEGG,KEGG	THBS4,TGFB2,LRP1,TGFB3,TLR9,IL10,KLRB1,CD36
query_1	TRUE	0.00993375	49	1415	11	0.00777385	0.22449	KEGG:04340	KEGG	Hedgehog signaling pathway	17860	302	KEGG:00000	KEGG,KEGG,KEGG,KEGG,KEGG,KEGG,KEGG,KEGG,KEGG,KEGG,KEGG	GPR161,CDON,CCND2,BOC,GLI3,GAS1,GLI2,ADRBK2,PTCH2,KIF7,SCUBE2
query_1	TRUE	0.00993375	104	1415	18	0.0127208	0.173077	KEGG:04145	KEGG	Phagosome	17860	281	KEGG:00000	KEGG,KEGG,KEGG,KEGG,KEGG,KEGG,KEGG,KEGG,KEGG,KEGG,KEGG,KEGG,KEGG,KEGG,KEGG,KEGG,KEGG,KEGG	THBS4,TUBA1B,TUBA1A,TUBB,SCARB1,MSR1,COLEC12,MRC2,HLA-DMB,DYNC1I1,CD209,C1R,TLR6,FCGR2A,CD36,CORO1A,NCF2,ITGAM
query_1	TRUE	0.0110776	23	1415	7	0.004947	0.304348	KEGG:03430	KEGG	Mismatch repair	17860	239	KEGG:00000	KEGG,KEGG,KEGG,KEGG,KEGG,KEGG,KEGG	EXO1,MSH6,MSH2,RFC2,RFC3,RFC4,PCNA
query_1	TRUE	0.0110776	23	1415	7	0.004947	0.304348	KEGG:04672	KEGG	Intestinal immune network for IgA production	17860	344	KEGG:00000	KEGG,KEGG,KEGG,KEGG,KEGG,KEGG,KEGG	CXCR4,ITGA4,HLA-DMB,CD86,IL10,TNFSF13B,CD28
query_1	TRUE	0.0123424	124	1415	20	0.0141343	0.16129	KEGG:04390	KEGG	Hippo signaling pathway	17860	310	KEGG:00000	KEGG,KEGG,KEGG,KEGG,KEGG,KEGG,KEGG,KEGG,KEGG,KEGG,KEGG,KEGG,KEGG,KEGG,KEGG,KEGG,KEGG,KEGG,KEGG,KEGG	BIRC5,WNT5B,FZD10,FZD2,FZD7,CCND2,PPP1CC,LEF1,TGFB2,LLGL1,GLI2,FZD3,AXIN2,FRMD6,TGFB3,TCF7,TEAD2,CTNNA3,WNT9A,BMP7
query_1	TRUE	0.0123424	66	1415	13	0.00918728	0.19697	KEGG:05412	KEGG	Arrhythmogenic right ventricular cardiomyopathy	17860	490	KEGG:00000	KEGG,KEGG,KEGG,KEGG,KEGG,KEGG,KEGG,KEGG,KEGG,KEGG,KEGG,KEGG,KEGG	SGCD,DTNA,CACNB3,LEF1,ITGA4,SSPN,CACNA1C,GJA1,RYR2,CACNA2D2,TCF7,CTNNA3,CDH2
query_1	TRUE	0.015294	68	1415	13	0.00918728	0.191176	KEGG:04713	KEGG	Circadian entrainment	17860	348	KEGG:00000	KEGG,KEGG,KEGG,KEGG,KEGG,KEGG,KEGG,KEGG,KEGG,KEGG,KEGG,KEGG,KEGG	ADCY2,ADCY7,PLCB4,CACNA1C,CAMK2D,GRIN2B,GRIN2A,GNB4,GNG2,RYR2,ADCY1,GNG4,RYR1
query_1	TRUE	0.015294	76	1415	14	0.00989399	0.184211	KEGG:04916	KEGG	Melanogenesis	17860	373	KEGG:00000	KEGG,KEGG,KEGG,KEGG,KEGG,KEGG,KEGG,KEGG,KEGG,KEGG,KEGG,KEGG,KEGG,KEGG	WNT5B,ADCY2,FZD10,FZD2,FZD7,LEF1,ADCY7,PLCB4,CAMK2D,CREB3L1,FZD3,ADCY1,TCF7,WNT9A
query_1	TRUE	0.015294	31	1415	8	0.00565371	0.258065	KEGG:04061	KEGG	Viral protein interaction with cytokine and cytokine receptor	17860	254	KEGG:00000	KEGG,KEGG,KEGG,KEGG,KEGG,KEGG,KEGG,KEGG	CXCR4,IL34,IL10,CCR1,IL2RB,CSF1R,IL10RA,CCR2
query_1	TRUE	0.0159898	164	1415	24	0.0169611	0.146341	KEGG:05170	KEGG	Human immunodeficiency virus 1 infection	17860	451	KEGG:00000	KEGG,KEGG,KEGG,KEGG,KEGG,KEGG,KEGG,KEGG,KEGG,KEGG,KEGG,KEGG,KEGG,KEGG,KEGG,KEGG,KEGG,KEGG,KEGG,KEGG,KEGG,KEGG,KEGG,KEGG	CXCR4,CCNB2,CDK1,CHEK1,CCNB1,NFATC4,CDC25C,APOBEC3C,LIMK1,PAK3,FAS,AP1S2,BID,APOBEC3G,MAP2K6,GNB4,GNG2,SAMHD1,APOBEC3D,APOBEC3B,GNG4,CD4,FASLG,RAC2
query_1	TRUE	0.0167913	69	1415	13	0.00918728	0.188406	KEGG:04650	KEGG	Natural killer cell mediated cytotoxicity	17860	334	KEGG:00000	KEGG,KEGG,KEGG,KEGG,KEGG,KEGG,KEGG,KEGG,KEGG,KEGG,KEGG,KEGG,KEGG	FYN,FAS,BID,IFNAR2,CD48,KLRC2,LAT2,LCP2,CD244,FASLG,ZAP70,HCST,RAC2
query_1	TRUE	0.0206302	14	1415	5	0.00353357	0.357143	KEGG:05332	KEGG	Graft-versus-host disease	17860	487	KEGG:00000	KEGG,KEGG,KEGG,KEGG,KEGG	FAS,HLA-DMB,CD86,CD28,FASLG
query_1	TRUE	0.0215129	20	1415	6	0.00424028	0.3	KEGG:05340	KEGG	Primary immunodeficiency	17860	488	KEGG:00000	KEGG,KEGG,KEGG,KEGG,KEGG,KEGG	CD8A,BTK,CD8B,CD4,ADA,ZAP70
query_1	TRUE	0.0224969	80	1415	14	0.00989399	0.175	KEGG:04724	KEGG	Glutamatergic synapse	17860	354	KEGG:00000	KEGG,KEGG,KEGG,KEGG,KEGG,KEGG,KEGG,KEGG,KEGG,KEGG,KEGG,KEGG,KEGG,KEGG	ADCY2,GRM7,ADCY7,PLCB4,CACNA1C,GRIN2B,GRIN2A,GNB4,DLGAP1,ADRBK2,GNG2,ADCY1,GNG4,GRIK2
query_1	TRUE	0.0250403	171	1415	24	0.0169611	0.140351	KEGG:05205	KEGG	Proteoglycans in cancer	17860	457	KEGG:00000	KEGG,KEGG,KEGG,KEGG,KEGG,KEGG,KEGG,KEGG,KEGG,KEGG,KEGG,KEGG,KEGG,KEGG,KEGG,KEGG,KEGG,KEGG,KEGG,KEGG,KEGG,KEGG,KEGG,KEGG	IGF2,WNT5B,FZD10,FZD2,FZD7,PDCD4,TIAM1,PPP1CC,FN1,TP53,FAS,MMP2,TGFB2,CAMK2D,FGFR1,FLNC,COL1A2,FZD3,LUM,WNT9A,ANK1,FASLG,TWIST2,DCN
query_1	TRUE	0.026024	57	1415	11	0.00777385	0.192982	KEGG:03250	KEGG	Viral life cycle - HIV-1	17860	223	KEGG:00000	KEGG,KEGG,KEGG,KEGG,KEGG,KEGG,KEGG,KEGG,KEGG,KEGG,KEGG	CXCR4,MAP1B,CPSF6,APOBEC3C,APOBEC3G,BICD1,FEZ1,SAMHD1,APOBEC3D,APOBEC3B,CD4
query_1	TRUE	0.0264882	240	1415	31	0.0219081	0.129167	KEGG:04010	KEGG	MAPK signaling pathway	17860	243	KEGG:00000	KEGG,KEGG,KEGG,KEGG,KEGG,KEGG,KEGG,KEGG,KEGG,KEGG,KEGG,KEGG,KEGG,KEGG,KEGG,KEGG,KEGG,KEGG,KEGG,KEGG,KEGG,KEGG,KEGG,KEGG,KEGG,KEGG,KEGG,KEGG,KEGG,KEGG,KEGG	IGF2,CACNB3,MAP4K4,PDGFC,STMN1,TP53,DUSP4,FAS,CACNA1C,TGFB2,MAP3K12,NGFR,FGFR1,FLNC,MAP2K6,TGFB3,DUSP10,CACNA2D2,EFNA5,CSF1R,PGF,EFNA4,GDNF,FASLG,MAP4K1,RASGRP4,RAC2,FGF18,PTPN7,FGF10,BDNF
query_1	TRUE	0.0271413	154	1415	22	0.0155477	0.142857	KEGG:05169	KEGG	Epstein-Barr virus infection	17860	450	KEGG:00000	KEGG,KEGG,KEGG,KEGG,KEGG,KEGG,KEGG,KEGG,KEGG,KEGG,KEGG,KEGG,KEGG,KEGG,KEGG,KEGG,KEGG,KEGG,KEGG,KEGG,KEGG,KEGG	SKP2,CCNA2,CCND2,HDAC2,CDK4,CCNE2,TP53,APAF1,FAS,IKBKE,VIM,DDB2,BID,E2F2,IFNAR2,CDK6,SAP30,HLA-DMB,MAP2K6,BTK,CCNE1,RUNX3
query_1	TRUE	0.03083	43	1415	9	0.00636042	0.209302	KEGG:03410	KEGG	Base excision repair	17860	237	KEGG:00000	KEGG,KEGG,KEGG,KEGG,KEGG,KEGG,KEGG,KEGG,KEGG	NEIL3,TDG,POLE2,RFC2,RFC3,RFC4,PCNA,FEN1,POLE
query_1	TRUE	0.0310633	84	1415	14	0.00989399	0.166667	KEGG:04350	KEGG	TGF-beta signaling pathway	17860	304	KEGG:00000	KEGG,KEGG,KEGG,KEGG,KEGG,KEGG,KEGG,KEGG,KEGG,KEGG,KEGG,KEGG,KEGG,KEGG	HDAC2,RGMA,FMOD,TGFB2,FBN1,NBL1,RBL1,RGMB,TGFB3,EMP3,INHBA,BMP7,TF,DCN
query_1	TRUE	0.0310633	84	1415	14	0.00989399	0.166667	KEGG:05222	KEGG	Small cell lung cancer	17860	473	KEGG:00000	KEGG,KEGG,KEGG,KEGG,KEGG,KEGG,KEGG,KEGG,KEGG,KEGG,KEGG,KEGG,KEGG,KEGG	LAMA4,SKP2,CDK4,CCNE2,LAMC1,FN1,TP53,APAF1,DDB2,E2F2,CDK6,CKS2,CKS1B,CCNE1
query_1	TRUE	0.0362248	77	1415	13	0.00918728	0.168831	KEGG:05414	KEGG	Dilated cardiomyopathy	17860	491	KEGG:00000	KEGG,KEGG,KEGG,KEGG,KEGG,KEGG,KEGG,KEGG,KEGG,KEGG,KEGG,KEGG,KEGG	SGCD,ADCY2,DTNA,CACNB3,ITGA4,ADCY7,SSPN,CACNA1C,TGFB2,TGFB3,RYR2,CACNA2D2,ADCY1
query_1	TRUE	0.0384935	179	1415	24	0.0169611	0.134078	KEGG:04014	KEGG	Ras signaling pathway	17860	247	KEGG:00000	KEGG,KEGG,KEGG,KEGG,KEGG,KEGG,KEGG,KEGG,KEGG,KEGG,KEGG,KEGG,KEGG,KEGG,KEGG,KEGG,KEGG,KEGG,KEGG,KEGG,KEGG,KEGG,KEGG,KEGG	IGF2,TIAM1,PDGFC,PAK3,NGFR,GRIN2B,GRIN2A,FGFR1,HTR7,GNB4,RASA3,GNG2,EFNA5,GNG4,CSF1R,PGF,EFNA4,FASLG,RASGRP4,ZAP70,RAC2,FGF18,FGF10,BDNF
query_1	TRUE	0.0443685	46	1415	9	0.00636042	0.195652	KEGG:05416	KEGG	Viral myocarditis	17860	493	KEGG:00000	KEGG,KEGG,KEGG,KEGG,KEGG,KEGG,KEGG,KEGG,KEGG	SGCD,DTNA,FYN,SSPN,BID,HLA-DMB,CD86,CD28,RAC2
query_1	TRUE	0.0443685	97	1415	15	0.0106007	0.154639	KEGG:04611	KEGG	Platelet activation	17860	321	KEGG:00000	KEGG,KEGG,KEGG,KEGG,KEGG,KEGG,KEGG,KEGG,KEGG,KEGG,KEGG,KEGG,KEGG,KEGG,KEGG	COL3A1,ADCY2,PPP1CC,FYN,ADCY7,PLCB4,VWF,COL1A2,BTK,TBXAS1,ADCY1,APBB1IP,FCGR2A,LCP2,FERMT3
query_1	TRUE	0.0481534	135	1415	19	0.0134276	0.140741	KEGG:05225	KEGG	Hepatocellular carcinoma	17860	476	KEGG:00000	KEGG,KEGG,KEGG,KEGG,KEGG,KEGG,KEGG,KEGG,KEGG,KEGG,KEGG,KEGG,KEGG,KEGG,KEGG,KEGG,KEGG,KEGG,KEGG	IGF2,WNT5B,FZD10,FZD2,FZD7,SMARCD3,CDK4,TP53,LEF1,ARID2,TGFB2,DDB2,E2F2,CDK6,FZD3,AXIN2,TGFB3,TCF7,WNT9A
query_1	TRUE	0.0492838	145	1415	20	0.0141343	0.137931	KEGG:05167	KEGG	Kaposi sarcoma-associated herpesvirus infection	17860	448	KEGG:00000	KEGG,KEGG,KEGG,KEGG,KEGG,KEGG,KEGG,KEGG,KEGG,KEGG,KEGG,KEGG,KEGG,KEGG,KEGG,KEGG,KEGG,KEGG,KEGG,KEGG	NFATC4,CDK4,TP53,LEF1,FAS,IKBKE,BID,E2F2,IFNAR2,CDK6,MAP2K6,GNB4,CD200R1,GNG2,CD86,HCK,CLEC2B,TCF7,GNG4,CCR1
KEGG analysis of Downregulated DEGs
query	significant	p_value	term_size	query_size	intersection_size	precision	recall	term_id	source	term_name	effective_domain_size	source_order	parents	evidence_codes	intersection
query_1	TRUE	2.94261e-58	1199	2227	355	0.159407	0.29608	KEGG:01100	KEGG	Metabolic pathways	17860	181	KEGG:00000	KEGG,KEGG,KEGG,KEGG,KEGG,KEGG,KEGG,KEGG,KEGG,KEGG,KEGG,KEGG,KEGG,KEGG,KEGG,KEGG,KEGG,KEGG,KEGG,KEGG,KEGG,KEGG,KEGG,KEGG,KEGG,KEGG,KEGG,KEGG,KEGG,KEGG,KEGG,KEGG,KEGG,KEGG,KEGG,KEGG,KEGG,KEGG,KEGG,KEGG,KEGG,KEGG,KEGG,KEGG,KEGG,KEGG,KEGG,KEGG,KEGG,KEGG,KEGG,KEGG,KEGG,KEGG,KEGG,KEGG,KEGG,KEGG,KEGG,KEGG,KEGG,KEGG,KEGG,KEGG,KEGG,KEGG,KEGG,KEGG,KEGG,KEGG,KEGG,KEGG,KEGG,KEGG,KEGG,KEGG,KEGG,KEGG,KEGG,KEGG…	ATP6V1C2,HSD11B2,DMGDH,MIOX,BHMT2,HAO2,ALDOB,INPP5J,UPB1,ACSM2B,HGD,AGMAT,CYP4F3,BHMT,LDHD,FUT6,PAH,HPD,GBA3,ACSM2A,ALDH4A1,KL,CA12,CRYL1,PCK1,ALDH6A1,ALDH1L1,CA2,ATP6V0A4,PNP,HOGA1,ALDH8A1,DPYS,BBOX1,GLDC,ATP6V0D2,AGXT2,PRODH,EHHADH,GSTM3,PRODH2,GGT6,PKLR,KHK,ACAT1,ARG2,DCXR,OGDHL,GSTA1,AOC1,MT-CYB,TREH,FBP1,UGT2B7,HMGCS2,MAOA,ANPEP,DDC,ASPDH,PRDM16,GALNT14,CTH,GOT1,DAO,AFMID,ACMSD,ACO2,MT-ND1,G…
query_1	TRUE	8.9216e-34	5949	2227	1007	0.452178	0.169272	KEGG:00000	KEGG	KEGG root term	17860	1		KEGG,KEGG,KEGG,KEGG,KEGG,KEGG,KEGG,KEGG,KEGG,KEGG,KEGG,KEGG,KEGG,KEGG,KEGG,KEGG,KEGG,KEGG,KEGG,KEGG,KEGG,KEGG,KEGG,KEGG,KEGG,KEGG,KEGG,KEGG,KEGG,KEGG,KEGG,KEGG,KEGG,KEGG,KEGG,KEGG,KEGG,KEGG,KEGG,KEGG,KEGG,KEGG,KEGG,KEGG,KEGG,KEGG,KEGG,KEGG,KEGG,KEGG,KEGG,KEGG,KEGG,KEGG,KEGG,KEGG,KEGG,KEGG,KEGG,KEGG,KEGG,KEGG,KEGG,KEGG,KEGG,KEGG,KEGG,KEGG,KEGG,KEGG,KEGG,KEGG,KEGG,KEGG,KEGG,KEGG,KEGG,KEGG,KEGG,KEGG…	ATP6V1C2,HSD11B2,AQP2,EGF,SLC22A8,DMGDH,SLC6A19,MIOX,KNG1,BHMT2,SLC9A3,HAO2,ALDOB,CLCNKB,INPP5J,UPB1,ACSM2B,SLC22A2,CALB1,DEFB1,HGD,CUBN,AGMAT,CYP4F3,BHMT,LDHD,SERPINA5,FUT6,SLC34A1,SCNN1G,PAH,HPD,GBA3,RASD1,ACSM2A,KCNJ1,ALDH4A1,AQP1,KL,SLC22A7,IYD,CA12,CRYL1,PCK1,CYFIP2,ALDH6A1,TMPRSS2,ALDH1L1,CA2,PLG,AQP3,PAQR5,FXYD2,ACE2,ATP6V0A4,SLC6A12,F11,SLC36A2,SLC39A5,PNP,PTGER3,SLC23A1,PTH2R,HOGA1,ALDH8…
query_1	TRUE	2.20502e-13	56	2227	32	0.0143691	0.571429	KEGG:04976	KEGG	Bile secretion	17860	407	KEGG:00000	KEGG,KEGG,KEGG,KEGG,KEGG,KEGG,KEGG,KEGG,KEGG,KEGG,KEGG,KEGG,KEGG,KEGG,KEGG,KEGG,KEGG,KEGG,KEGG,KEGG,KEGG,KEGG,KEGG,KEGG,KEGG,KEGG,KEGG,KEGG,KEGG,KEGG,KEGG,KEGG	SLC22A8,SLC9A3,AQP1,SLC22A7,CA2,FXYD2,SLC4A4,ABCC2,UGT2B7,ATP1B1,ATP1A1,NR0B2,UGT2A3,UGT1A6,UGT1A1,UGT1A4,SLC10A2,SLC5A1,NR1H4,ATP1B3,SLC51B,ABCG8,LDLR,ABCB1,SLC22A1,NCEH1,ADCY4,ADCY9,SLC51A,ADCY5,ADCY8,ATP1B2
query_1	TRUE	5.02386e-12	42	2227	26	0.0116749	0.619048	KEGG:00330	KEGG	Arginine and proline metabolism	17860	36	KEGG:00000	KEGG,KEGG,KEGG,KEGG,KEGG,KEGG,KEGG,KEGG,KEGG,KEGG,KEGG,KEGG,KEGG,KEGG,KEGG,KEGG,KEGG,KEGG,KEGG,KEGG,KEGG,KEGG,KEGG,KEGG,KEGG,KEGG	AGMAT,ALDH4A1,HOGA1,PRODH,PRODH2,ARG2,AOC1,MAOA,GOT1,DAO,NOS1,GATM,CNDP2,NOS3,CKB,SAT2,GOT2,CNDP1,CKMT2,ALDH3A2,MAOB,ALDH2,NOS2,ALDH1B1,GAMT,P4HA2
query_1	TRUE	2.1166e-11	20	2227	17	0.00763359	0.85	KEGG:04964	KEGG	Proximal tubule bicarbonate reclamation	17860	399	KEGG:00000	KEGG,KEGG,KEGG,KEGG,KEGG,KEGG,KEGG,KEGG,KEGG,KEGG,KEGG,KEGG,KEGG,KEGG,KEGG,KEGG,KEGG	SLC9A3,AQP1,PCK1,CA2,FXYD2,SLC4A4,ATP1B1,ATP1A1,PCK2,SLC25A10,CA4,ATP1B3,GLUD1,GLUD2,GLS,SLC38A3,ATP1B2
query_1	TRUE	1.83693e-10	100	2227	40	0.0179614	0.4	KEGG:01200	KEGG	Carbon metabolism	17860	184	KEGG:00000	KEGG,KEGG,KEGG,KEGG,KEGG,KEGG,KEGG,KEGG,KEGG,KEGG,KEGG,KEGG,KEGG,KEGG,KEGG,KEGG,KEGG,KEGG,KEGG,KEGG,KEGG,KEGG,KEGG,KEGG,KEGG,KEGG,KEGG,KEGG,KEGG,KEGG,KEGG,KEGG,KEGG,KEGG,KEGG,KEGG,KEGG,KEGG,KEGG,KEGG	HAO2,ALDOB,ALDH6A1,GLDC,PKLR,ACAT1,OGDHL,FBP1,GOT1,ACO2,OGDH,GPT,PDHA1,PC,SHMT1,ACSS1,IDH2,RGN,CAT,SDHA,ACADS,SUCLG1,GLUD1,GLUD2,IDNK,GLYCTK,SDHD,SDHB,ECHS1,GOT2,ENO1,ACO1,AMT,ACSS2,HKDC1,ME3,ALDOC,PRPS2,PFKP,PGAM2
query_1	TRUE	1.98179e-10	172	2227	56	0.0251459	0.325581	KEGG:04020	KEGG	Calcium signaling pathway	17860	250	KEGG:00000	KEGG,KEGG,KEGG,KEGG,KEGG,KEGG,KEGG,KEGG,KEGG,KEGG,KEGG,KEGG,KEGG,KEGG,KEGG,KEGG,KEGG,KEGG,KEGG,KEGG,KEGG,KEGG,KEGG,KEGG,KEGG,KEGG,KEGG,KEGG,KEGG,KEGG,KEGG,KEGG,KEGG,KEGG,KEGG,KEGG,KEGG,KEGG,KEGG,KEGG,KEGG,KEGG,KEGG,KEGG,KEGG,KEGG,KEGG,KEGG,KEGG,KEGG,KEGG,KEGG,KEGG,KEGG,KEGG,KEGG	EGF,PTGER3,FGFR3,BDKRB2,PLCG2,PTGER1,NOS1,FGF1,AGTR1,SMIM6,NOS3,MST1,PDGFB,TFEB,GRM1,FGFR4,KDR,FLT1,CHRM3,ERBB2,ERBB3,TBXA2R,SLC25A4,ADRB1,MCOLN3,FLT4,ADRA1B,PLCZ1,VEGFA,SLC25A5,FGF9,EDNRB,PDE1A,CACNA1H,PLCD1,PPIF,BDKRB1,ADCY4,ERBB4,PRKCA,ADCY9,TGFA,NOS2,MET,PDE1C,PTGFR,EGFR,NTRK1,TNNC1,PDGFA,ADRA1A,ATP2A3,CAMK1G,ADCY8,TACR1,AVPR1A
query_1	TRUE	2.38353e-10	22	2227	17	0.00763359	0.772727	KEGG:00650	KEGG	Butanoate metabolism	17860	112	KEGG:00000	KEGG,KEGG,KEGG,KEGG,KEGG,KEGG,KEGG,KEGG,KEGG,KEGG,KEGG,KEGG,KEGG,KEGG,KEGG,KEGG,KEGG	ACSM2B,ACSM2A,EHHADH,ACAT1,HMGCS2,OXCT1,ABAT,ACADS,HADH,HMGCL,L2HGDH,GAD1,ECHS1,BDH1,ACSM5,ACSM3,ACSM1
query_1	TRUE	2.55874e-10	33	2227	21	0.00942973	0.636364	KEGG:00982	KEGG	Drug metabolism - cytochrome P450	17860	156	KEGG:00000	KEGG,KEGG,KEGG,KEGG,KEGG,KEGG,KEGG,KEGG,KEGG,KEGG,KEGG,KEGG,KEGG,KEGG,KEGG,KEGG,KEGG,KEGG,KEGG,KEGG,KEGG	GSTM3,GSTA1,UGT2B7,MAOA,CYP2B6,ADH6,UGT2A3,UGT1A6,UGT1A1,FMO4,UGT1A4,FMO5,GSTK1,CYP2C9,FMO1,CYP3A5,MAOB,FMO2,GSTM4,GSTM5,ALDH3B1
query_1	TRUE	2.55874e-10	36	2227	22	0.00987876	0.611111	KEGG:00071	KEGG	Fatty acid degradation	17860	11	KEGG:00000	KEGG,KEGG,KEGG,KEGG,KEGG,KEGG,KEGG,KEGG,KEGG,KEGG,KEGG,KEGG,KEGG,KEGG,KEGG,KEGG,KEGG,KEGG,KEGG,KEGG,KEGG,KEGG	EHHADH,ACAT1,ADH6,CPT1A,ACAA1,ACADSB,ACAA2,ACSL1,ECI2,ACADL,ECI1,ACADVL,ACADS,HADH,CPT2,ECHS1,ACADM,ACSL6,GCDH,ALDH3A2,ALDH2,ALDH1B1
query_1	TRUE	5.61591e-09	34	2227	20	0.00898069	0.588235	KEGG:00260	KEGG	Glycine, serine and threonine metabolism	17860	28	KEGG:00000	KEGG,KEGG,KEGG,KEGG,KEGG,KEGG,KEGG,KEGG,KEGG,KEGG,KEGG,KEGG,KEGG,KEGG,KEGG,KEGG,KEGG,KEGG,KEGG,KEGG	DMGDH,BHMT,GLDC,AGXT2,MAOA,CTH,DAO,PIPOX,SHMT1,GATM,CHDH,GCAT,GLYCTK,GRHPR,AMT,MAOB,SARDH,GAMT,PGAM2,AOC3
query_1	TRUE	1.08999e-08	32	2227	19	0.00853166	0.59375	KEGG:00380	KEGG	Tryptophan metabolism	17860	48	KEGG:00000	KEGG,KEGG,KEGG,KEGG,KEGG,KEGG,KEGG,KEGG,KEGG,KEGG,KEGG,KEGG,KEGG,KEGG,KEGG,KEGG,KEGG,KEGG,KEGG	ALDH8A1,EHHADH,ACAT1,AOC1,MAOA,DDC,AFMID,ACMSD,CAT,DHTKD1,HAAO,HADH,ECHS1,GCDH,ALDH3A2,MAOB,ALDH2,KMO,ALDH1B1
query_1	TRUE	1.08999e-08	18	2227	14	0.00628648	0.777778	KEGG:00220	KEGG	Arginine biosynthesis	17860	21	KEGG:00000	KEGG,KEGG,KEGG,KEGG,KEGG,KEGG,KEGG,KEGG,KEGG,KEGG,KEGG,KEGG,KEGG,KEGG	ARG2,GOT1,NAGS,NOS1,GPT,ASL,ASS1,NOS3,ACY1,GLUD1,GLUD2,GLS,GOT2,NOS2
query_1	TRUE	1.68445e-08	36	2227	20	0.00898069	0.555556	KEGG:00980	KEGG	Metabolism of xenobiotics by cytochrome P450	17860	154	KEGG:00000	KEGG,KEGG,KEGG,KEGG,KEGG,KEGG,KEGG,KEGG,KEGG,KEGG,KEGG,KEGG,KEGG,KEGG,KEGG,KEGG,KEGG,KEGG,KEGG,KEGG	GSTM3,GSTA1,UGT2B7,AKR7A3,CYP2B6,ADH6,UGT2A3,AKR7L,UGT1A6,CBR1,UGT1A1,UGT1A4,GSTK1,DHDH,CYP2C9,CYP3A5,AKR1C1,GSTM4,GSTM5,ALDH3B1
query_1	TRUE	1.68445e-08	130	2227	43	0.0193085	0.330769	KEGG:04080	KEGG	Neuroactive ligand-receptor interaction	17860	263	KEGG:00000	KEGG,KEGG,KEGG,KEGG,KEGG,KEGG,KEGG,KEGG,KEGG,KEGG,KEGG,KEGG,KEGG,KEGG,KEGG,KEGG,KEGG,KEGG,KEGG,KEGG,KEGG,KEGG,KEGG,KEGG,KEGG,KEGG,KEGG,KEGG,KEGG,KEGG,KEGG,KEGG,KEGG,KEGG,KEGG,KEGG,KEGG,KEGG,KEGG,KEGG,KEGG,KEGG,KEGG	KNG1,PLG,PTGER3,PTH2R,GCGR,PTH1R,NPY1R,BDKRB2,PTGER1,GABRA2,ADRA2B,AGTR1,NPY5R,F2RL1,CALCR,GRM1,QRFPR,ADM2,CHRM3,PRLR,THRB,TBXA2R,ADRB1,ADRA1B,EDNRB,SSTR2,LYNX1,BDKRB1,ADM,AGT,PTGFR,F2RL3,EDN1,MTNR1A,MC1R,ADRA1A,P2RY2,RXFP1,SSTR5,LYPD6B,TACR1,SSTR1,AVPR1A
query_1	TRUE	2.23726e-08	78	2227	31	0.0139201	0.397436	KEGG:04146	KEGG	Peroxisome	17860	282	KEGG:00000	KEGG,KEGG,KEGG,KEGG,KEGG,KEGG,KEGG,KEGG,KEGG,KEGG,KEGG,KEGG,KEGG,KEGG,KEGG,KEGG,KEGG,KEGG,KEGG,KEGG,KEGG,KEGG,KEGG,KEGG,KEGG,KEGG,KEGG,KEGG,KEGG,KEGG,KEGG	HAO2,EHHADH,SLC27A2,DAO,EPHX2,ACAA1,PIPOX,IDH2,PHYH,ACSL1,ECI2,CAT,HMGCL,GSTK1,NUDT7,MVK,CRAT,ECH1,ABCD3,PECR,MLYCD,ACSL6,DECR2,DHRS4,AMACR,NUDT13,NOS2,ACOX2,DDO,PXMP2,PXMP4
query_1	TRUE	3.05417e-08	55	2227	25	0.0112259	0.454545	KEGG:03320	KEGG	PPAR signaling pathway	17860	236	KEGG:00000	KEGG,KEGG,KEGG,KEGG,KEGG,KEGG,KEGG,KEGG,KEGG,KEGG,KEGG,KEGG,KEGG,KEGG,KEGG,KEGG,KEGG,KEGG,KEGG,KEGG,KEGG,KEGG,KEGG,KEGG,KEGG	PCK1,EHHADH,SLC27A2,PPARA,HMGCS2,AQP7,PLIN5,FABP1,CPT1A,ACAA1,FABP3,ACSL1,ACADL,PCK2,CYP8B1,CPT2,PLIN4,PPARG,LPL,SCD5,ACADM,ACSL6,ME3,GK,ACOX2
query_1	TRUE	1.69972e-07	63	2227	26	0.0116749	0.412698	KEGG:04974	KEGG	Protein digestion and absorption	17860	405	KEGG:00000	KEGG,KEGG,KEGG,KEGG,KEGG,KEGG,KEGG,KEGG,KEGG,KEGG,KEGG,KEGG,KEGG,KEGG,KEGG,KEGG,KEGG,KEGG,KEGG,KEGG,KEGG,KEGG,KEGG,KEGG,KEGG,KEGG	SLC6A19,SLC9A3,FXYD2,ACE2,SLC36A2,SLC3A1,KCNQ1,SLC1A1,ATP1B1,ATP1A1,COL4A3,KCNK5,SLC7A9,XPNPEP2,MME,COL4A4,DPP4,ATP1B3,SLC3A2,SLC7A8,KCNJ13,COL18A1,COL19A1,SLC7A7,SLC1A5,ATP1B2
query_1	TRUE	2.57307e-07	16	2227	12	0.00538841	0.75	KEGG:00340	KEGG	Histidine metabolism	17860	40	KEGG:00000	KEGG,KEGG,KEGG,KEGG,KEGG,KEGG,KEGG,KEGG,KEGG,KEGG,KEGG,KEGG	AOC1,MAOA,CNDP2,ASPA,CNDP1,AMDHD1,ALDH3A2,MAOB,ALDH2,HNMT,ALDH1B1,ALDH3B1
query_1	TRUE	2.57307e-07	41	2227	20	0.00898069	0.487805	KEGG:04978	KEGG	Mineral absorption	17860	409	KEGG:00000	KEGG,KEGG,KEGG,KEGG,KEGG,KEGG,KEGG,KEGG,KEGG,KEGG,KEGG,KEGG,KEGG,KEGG,KEGG,KEGG,KEGG,KEGG,KEGG,KEGG	SLC6A19,SLC9A3,SLC34A1,FXYD2,ATP1B1,ATP1A1,MT1E,SLC34A3,MT1F,SLC5A1,SLC26A6,SLC39A4,TRPV6,MT1X,ATP1B3,CLCN2,MT2A,VDR,SLC30A1,ATP1B2
query_1	TRUE	3.25412e-07	38	2227	19	0.00853166	0.5	KEGG:00620	KEGG	Pyruvate metabolism	17860	99	KEGG:00000	KEGG,KEGG,KEGG,KEGG,KEGG,KEGG,KEGG,KEGG,KEGG,KEGG,KEGG,KEGG,KEGG,KEGG,KEGG,KEGG,KEGG,KEGG,KEGG	LDHD,PCK1,PKLR,ACAT1,ADH6,PDHA1,PC,ACSS1,ACOT12,PCK2,HAGH,ACACB,GRHPR,ALDH3A2,ACSS2,ALDH2,ME3,LDHB,ALDH1B1
query_1	TRUE	3.41024e-07	28	2227	16	0.00718455	0.571429	KEGG:00410	KEGG	beta-Alanine metabolism	17860	55	KEGG:00000	KEGG,KEGG,KEGG,KEGG,KEGG,KEGG,KEGG,KEGG,KEGG,KEGG,KEGG,KEGG,KEGG,KEGG,KEGG,KEGG	UPB1,ALDH6A1,DPYS,EHHADH,CNDP2,ABAT,ACADS,GAD1,ECHS1,MLYCD,CNDP1,ALDH3A2,ALDH2,ALDH1B1,AOC3,ALDH3B1
query_1	TRUE	5.15802e-07	32	2227	17	0.00763359	0.53125	KEGG:00250	KEGG	Alanine, aspartate and glutamate metabolism	17860	25	KEGG:00000	KEGG,KEGG,KEGG,KEGG,KEGG,KEGG,KEGG,KEGG,KEGG,KEGG,KEGG,KEGG,KEGG,KEGG,KEGG,KEGG,KEGG	ALDH4A1,AGXT2,GOT1,ASRGL1,GPT,ASL,NAT8L,ASS1,ABAT,ASPA,GAD1,GLUD1,GLUD2,GLS,GOT2,DDO,FOLH1
query_1	TRUE	1.39188e-06	27	2227	15	0.00673552	0.555556	KEGG:04960	KEGG	Aldosterone-regulated sodium reabsorption	17860	396	KEGG:00000	KEGG,KEGG,KEGG,KEGG,KEGG,KEGG,KEGG,KEGG,KEGG,KEGG,KEGG,KEGG,KEGG,KEGG,KEGG	HSD11B2,SCNN1G,KCNJ1,FXYD2,ATP1B1,ATP1A1,SCNN1A,SCNN1B,NR3C2,INSR,ATP1B3,NEDD4L,PRKCA,SGK1,ATP1B2
query_1	TRUE	1.39188e-06	27	2227	15	0.00673552	0.555556	KEGG:00830	KEGG	Retinol metabolism	17860	127	KEGG:00000	KEGG,KEGG,KEGG,KEGG,KEGG,KEGG,KEGG,KEGG,KEGG,KEGG,KEGG,KEGG,KEGG,KEGG,KEGG	UGT2B7,CYP2B6,ADH6,UGT2A3,UGT1A6,UGT1A1,UGT1A4,RDH13,CYP3A7,CYP2C9,CYP3A5,PNPLA4,RETSAT,DHRS4,ALDH1A1
query_1	TRUE	1.58418e-06	18	2227	12	0.00538841	0.666667	KEGG:00040	KEGG	Pentose and glucuronate interconversions	17860	5	KEGG:00000	KEGG,KEGG,KEGG,KEGG,KEGG,KEGG,KEGG,KEGG,KEGG,KEGG,KEGG,KEGG	KL,CRYL1,DCXR,UGT2B7,UGT2A3,UGT1A6,UGT1A1,UGT1A4,DHDH,SORD,FGGY,XYLB
query_1	TRUE	1.89671e-06	31	2227	16	0.00718455	0.516129	KEGG:05204	KEGG	Chemical carcinogenesis - DNA adducts	17860	456	KEGG:00000	KEGG,KEGG,KEGG,KEGG,KEGG,KEGG,KEGG,KEGG,KEGG,KEGG,KEGG,KEGG,KEGG,KEGG,KEGG,KEGG	GSTM3,GSTA1,UGT2B7,UGT2A3,UGT1A6,CBR1,UGT1A1,UGT1A4,GSTK1,CYP3A7,CYP2C9,CYP3A5,GSTM4,GSTM5,SULT1A2,PTGS2
query_1	TRUE	2.97082e-06	43	2227	19	0.00853166	0.44186	KEGG:00280	KEGG	Valine, leucine and isoleucine degradation	17860	31	KEGG:00000	KEGG,KEGG,KEGG,KEGG,KEGG,KEGG,KEGG,KEGG,KEGG,KEGG,KEGG,KEGG,KEGG,KEGG,KEGG,KEGG,KEGG,KEGG,KEGG	ALDH6A1,AGXT2,EHHADH,ACAT1,HMGCS2,ACAA1,ACADSB,ACAA2,OXCT1,ABAT,ACADS,HADH,HMGCL,HIBADH,ECHS1,ACADM,ALDH3A2,ALDH2,ALDH1B1
query_1	TRUE	3.05194e-06	16	2227	11	0.00493938	0.6875	KEGG:00053	KEGG	Ascorbate and aldarate metabolism	17860	8	KEGG:00000	KEGG,KEGG,KEGG,KEGG,KEGG,KEGG,KEGG,KEGG,KEGG,KEGG,KEGG	MIOX,KL,UGT2B7,UGT2A3,UGT1A6,UGT1A1,UGT1A4,RGN,ALDH3A2,ALDH2,ALDH1B1
query_1	TRUE	3.47093e-06	11	2227	9	0.00404131	0.818182	KEGG:00360	KEGG	Phenylalanine metabolism	17860	42	KEGG:00000	KEGG,KEGG,KEGG,KEGG,KEGG,KEGG,KEGG,KEGG,KEGG	PAH,HPD,MAOA,DDC,GOT1,GOT2,MAOB,AOC3,ALDH3B1
query_1	TRUE	4.18863e-06	48	2227	20	0.00898069	0.416667	KEGG:00010	KEGG	Glycolysis / Gluconeogenesis	17860	2	KEGG:00000	KEGG,KEGG,KEGG,KEGG,KEGG,KEGG,KEGG,KEGG,KEGG,KEGG,KEGG,KEGG,KEGG,KEGG,KEGG,KEGG,KEGG,KEGG,KEGG,KEGG	ALDOB,PCK1,PKLR,FBP1,ADH6,PDHA1,ACSS1,PCK2,GALM,ENO1,ALDH3A2,ACSS2,ALDH2,HKDC1,ALDOC,LDHB,PFKP,ALDH1B1,PGAM2,ALDH3B1
query_1	TRUE	6.05524e-06	49	2227	20	0.00898069	0.408163	KEGG:04610	KEGG	Complement and coagulation cascades	17860	320	KEGG:00000	KEGG,KEGG,KEGG,KEGG,KEGG,KEGG,KEGG,KEGG,KEGG,KEGG,KEGG,KEGG,KEGG,KEGG,KEGG,KEGG,KEGG,KEGG,KEGG,KEGG	KNG1,SERPINA5,PLG,F11,BDKRB2,KLKB1,PROC,SERPINF2,SERPINA1,PLAU,BDKRB1,C9,F3,F2RL3,CR1L,F5,TFPI,C4A,C6,CR1
query_1	TRUE	6.64267e-06	20	2227	12	0.00538841	0.6	KEGG:00350	KEGG	Tyrosine metabolism	17860	41	KEGG:00000	KEGG,KEGG,KEGG,KEGG,KEGG,KEGG,KEGG,KEGG,KEGG,KEGG,KEGG,KEGG	HGD,HPD,MAOA,DDC,GOT1,ADH6,FAHD1,TYRP1,GOT2,MAOB,AOC3,ALDH3B1
query_1	TRUE	6.64267e-06	166	2227	44	0.0197575	0.26506	KEGG:05415	KEGG	Diabetic cardiomyopathy	17860	492	KEGG:00000	KEGG,KEGG,KEGG,KEGG,KEGG,KEGG,KEGG,KEGG,KEGG,KEGG,KEGG,KEGG,KEGG,KEGG,KEGG,KEGG,KEGG,KEGG,KEGG,KEGG,KEGG,KEGG,KEGG,KEGG,KEGG,KEGG,KEGG,KEGG,KEGG,KEGG,KEGG,KEGG,KEGG,KEGG,KEGG,KEGG,KEGG,KEGG,KEGG,KEGG,KEGG,KEGG,KEGG,KEGG	MPC1,PPARA,MT-CYB,MT-ND1,MT-CO1,MT-ND2,MT-ND5,MT-ND4,MT-CO3,PDHA1,MT-ND4L,MT-ATP8,MT-ATP6,MT-CO2,MT-ND3,PDK2,AGTR1,NOS3,SDHA,NDUFV1,NDUFS8,INSR,CPT2,PRKCZ,MPC2,SDHD,TBC1D4,SDHB,SLC25A4,CYC1,COX5A,SLC25A5,COX8A,PPIF,MT-ND6,COX7B,COX7A1,UQCRFS1,COX5B,PRKCA,TGFBR2,ACE,AGT,ATP2A3
query_1	TRUE	6.64267e-06	109	2227	33	0.0148181	0.302752	KEGG:00190	KEGG	Oxidative phosphorylation	17860	18	KEGG:00000	KEGG,KEGG,KEGG,KEGG,KEGG,KEGG,KEGG,KEGG,KEGG,KEGG,KEGG,KEGG,KEGG,KEGG,KEGG,KEGG,KEGG,KEGG,KEGG,KEGG,KEGG,KEGG,KEGG,KEGG,KEGG,KEGG,KEGG,KEGG,KEGG,KEGG,KEGG,KEGG,KEGG	ATP6V1C2,ATP6V0A4,ATP6V0D2,MT-CYB,MT-ND1,MT-CO1,MT-ND2,MT-ND5,ATP6V1G3,MT-ND4,MT-CO3,ATP6V1B1,MT-ND4L,MT-ATP8,MT-ATP6,MT-CO2,ATP6V1A,MT-ND3,SDHA,NDUFV1,NDUFS8,SDHD,SDHB,ATP6V0E2,CYC1,COX5A,ATP6V0B,COX8A,MT-ND6,COX7B,COX7A1,UQCRFS1,COX5B
query_1	TRUE	8.01614e-06	27	2227	14	0.00628648	0.518519	KEGG:00140	KEGG	Steroid hormone biosynthesis	17860	17	KEGG:00000	KEGG,KEGG,KEGG,KEGG,KEGG,KEGG,KEGG,KEGG,KEGG,KEGG,KEGG,KEGG,KEGG,KEGG	HSD11B2,UGT2B7,UGT2A3,UGT1A6,UGT1A1,UGT1A4,CYP3A7,HSD17B8,CYP3A5,HSD3B2,DHRS11,AKR1C1,AKR1C3,HSD17B3
query_1	TRUE	1.35102e-05	187	2227	47	0.0211046	0.251337	KEGG:05208	KEGG	Chemical carcinogenesis - reactive oxygen species	17860	460	KEGG:00000	KEGG,KEGG,KEGG,KEGG,KEGG,KEGG,KEGG,KEGG,KEGG,KEGG,KEGG,KEGG,KEGG,KEGG,KEGG,KEGG,KEGG,KEGG,KEGG,KEGG,KEGG,KEGG,KEGG,KEGG,KEGG,KEGG,KEGG,KEGG,KEGG,KEGG,KEGG,KEGG,KEGG,KEGG,KEGG,KEGG,KEGG,KEGG,KEGG,KEGG,KEGG,KEGG,KEGG,KEGG,KEGG,KEGG,KEGG	EGF,GSTM3,GSTA1,MT-CYB,MT-ND1,MT-CO1,SLC26A1,MT-ND2,MT-ND5,EPHX2,MT-ND4,MT-CO3,MT-ND4L,MT-ATP8,MT-ATP6,MT-CO2,MT-ND3,CBR1,CAT,SDHA,SLC26A6,NDUFV1,NDUFS8,SDHD,SDHB,SLC25A4,CYC1,COX5A,VEGFA,SLC25A5,COX8A,EPHX3,AKR1C1,NQO1,PPIF,MT-ND6,GSTM4,COX7B,COX7A1,UQCRFS1,COX5B,GSTM5,MET,AKR1C3,FOS,EGFR,NOX4
query_1	TRUE	1.35102e-05	28	2227	14	0.00628648	0.5	KEGG:00630	KEGG	Glyoxylate and dicarboxylate metabolism	17860	107	KEGG:00000	KEGG,KEGG,KEGG,KEGG,KEGG,KEGG,KEGG,KEGG,KEGG,KEGG,KEGG,KEGG,KEGG,KEGG	HAO2,HOGA1,GLDC,ACAT1,AFMID,ACO2,SHMT1,ACSS1,CAT,GLYCTK,GRHPR,ACO1,AMT,ACSS2
query_1	TRUE	1.37514e-05	56	2227	21	0.00942973	0.375	KEGG:04971	KEGG	Gastric acid secretion	17860	402	KEGG:00000	KEGG,KEGG,KEGG,KEGG,KEGG,KEGG,KEGG,KEGG,KEGG,KEGG,KEGG,KEGG,KEGG,KEGG,KEGG,KEGG,KEGG,KEGG,KEGG,KEGG,KEGG	KCNJ1,CA2,KCNQ1,ATP1B1,ATP1A1,SLC9A4,KCNJ10,KCNJ15,KCNJ16,ATP1B3,CHRM3,SLC26A7,EZR,SSTR2,ADCY4,PRKCA,ADCY9,ADCY5,KCNK10,ADCY8,ATP1B2
query_1	TRUE	1.63942e-05	61	2227	22	0.00987876	0.360656	KEGG:01230	KEGG	Biosynthesis of amino acids	17860	188	KEGG:00000	KEGG,KEGG,KEGG,KEGG,KEGG,KEGG,KEGG,KEGG,KEGG,KEGG,KEGG,KEGG,KEGG,KEGG,KEGG,KEGG,KEGG,KEGG,KEGG,KEGG,KEGG,KEGG	ALDOB,PAH,PKLR,ARG2,CTH,GOT1,ACO2,NAGS,GPT,PC,ASL,SHMT1,IDH2,ASS1,ACY1,GOT2,ENO1,ACO1,ALDOC,PRPS2,PFKP,PGAM2
query_1	TRUE	2.44706e-05	45	2227	18	0.00808262	0.4	KEGG:00561	KEGG	Glycerolipid metabolism	17860	85	KEGG:00000	KEGG,KEGG,KEGG,KEGG,KEGG,KEGG,KEGG,KEGG,KEGG,KEGG,KEGG,KEGG,KEGG,KEGG,KEGG,KEGG,KEGG,KEGG	PNPLA2,MOGAT1,AGPAT3,PNPLA3,AGPAT2,LPIN3,MOGAT3,GLYCTK,LPL,ALDH3A2,ALDH2,MGLL,GK,LIPC,CEL,ALDH1B1,DGKG,PPAP2A
query_1	TRUE	3.75206e-05	34	2227	15	0.00673552	0.441176	KEGG:04742	KEGG	Taste transduction	17860	361	KEGG:00000	KEGG,KEGG,KEGG,KEGG,KEGG,KEGG,KEGG,KEGG,KEGG,KEGG,KEGG,KEGG,KEGG,KEGG,KEGG	SCNN1G,SCNN1A,GABRA2,KCNK5,SCNN1B,GRM1,CHRM3,SCN2A,PDE1A,ADCY4,ENTPD2,PDE1C,SCN9A,ADCY8,ASIC2
query_1	TRUE	4.49915e-05	60	2227	21	0.00942973	0.35	KEGG:04260	KEGG	Cardiac muscle contraction	17860	296	KEGG:00000	KEGG,KEGG,KEGG,KEGG,KEGG,KEGG,KEGG,KEGG,KEGG,KEGG,KEGG,KEGG,KEGG,KEGG,KEGG,KEGG,KEGG,KEGG,KEGG,KEGG,KEGG	FXYD2,MT-CYB,ATP1B1,ATP1A1,MT-CO1,MT-CO3,MT-CO2,ATP1B3,CYC1,COX5A,COX8A,COX7B,COX7A1,UQCRFS1,COX5B,MYL3,CACNA2D3,CACNB2,TNNC1,ATP2A3,ATP1B2
query_1	TRUE	4.66555e-05	196	2227	47	0.0211046	0.239796	KEGG:04714	KEGG	Thermogenesis	17860	349	KEGG:00000	KEGG,KEGG,KEGG,KEGG,KEGG,KEGG,KEGG,KEGG,KEGG,KEGG,KEGG,KEGG,KEGG,KEGG,KEGG,KEGG,KEGG,KEGG,KEGG,KEGG,KEGG,KEGG,KEGG,KEGG,KEGG,KEGG,KEGG,KEGG,KEGG,KEGG,KEGG,KEGG,KEGG,KEGG,KEGG,KEGG,KEGG,KEGG,KEGG,KEGG,KEGG,KEGG,KEGG,KEGG,KEGG,KEGG,KEGG	MT-CYB,PRDM16,MT-ND1,MT-CO1,MT-ND2,MT-ND5,CPT1A,MT-ND4,MT-CO3,PNPLA2,MT-ND4L,MT-ATP8,MT-ATP6,MT-CO2,MT-ND3,PRKAG2,ACSL1,PPARGC1A,PRKAA2,SDHA,PRKAB1,NDUFV1,NDUFS8,MAP2K3,CPT2,COA3,SDHD,PPARG,SDHB,CYC1,COX5A,ACSL6,NPR1,COX8A,MT-ND6,COX7B,COX7A1,MGLL,UQCRFS1,COX5B,ADCY4,RPS6KA6,ADCY9,RPS6KA1,ADCY5,ADCY8,BMP8B
query_1	TRUE	7.64032e-05	28	2227	13	0.00583745	0.464286	KEGG:01210	KEGG	2-Oxocarboxylic acid metabolism	17860	185	KEGG:00000	KEGG,KEGG,KEGG,KEGG,KEGG,KEGG,KEGG,KEGG,KEGG,KEGG,KEGG,KEGG,KEGG	AGXT2,OGDHL,GOT1,ACO2,NAGS,OGDH,GPT,PDHA1,IDH2,DHTKD1,ACY1,GOT2,ACO1
query_1	TRUE	8.52608e-05	21	2227	11	0.00493938	0.52381	KEGG:04975	KEGG	Fat digestion and absorption	17860	406	KEGG:00000	KEGG,KEGG,KEGG,KEGG,KEGG,KEGG,KEGG,KEGG,KEGG,KEGG,KEGG	ACAT1,FABP1,MTTP,PLA2G12B,AGPAT2,MOGAT3,GOT2,ABCG8,CEL,PPAP2A,NPC1L1
query_1	TRUE	8.77814e-05	49	2227	18	0.00808262	0.367347	KEGG:01212	KEGG	Fatty acid metabolism	17860	186	KEGG:00000	KEGG,KEGG,KEGG,KEGG,KEGG,KEGG,KEGG,KEGG,KEGG,KEGG,KEGG,KEGG,KEGG,KEGG,KEGG,KEGG,KEGG,KEGG	EHHADH,ACAT1,CPT1A,ELOVL7,ACAA1,ACADSB,ACAA2,ACSL1,ACADL,ACADVL,ACADS,HADH,CPT2,ECHS1,SCD5,ACADM,HSD17B8,ACSL6
query_1	TRUE	0.000103217	25	2227	12	0.00538841	0.48	KEGG:00051	KEGG	Fructose and mannose metabolism	17860	6	KEGG:00000	KEGG,KEGG,KEGG,KEGG,KEGG,KEGG,KEGG,KEGG,KEGG,KEGG,KEGG,KEGG	ALDOB,KHK,FBP1,PMM1,SORD,PFKFB2,ENOSF1,HKDC1,ALDOC,PFKFB3,PFKP,PFKFB1
query_1	TRUE	0.000108878	119	2227	32	0.0143691	0.268908	KEGG:01240	KEGG	Biosynthesis of cofactors	17860	190	KEGG:00000	KEGG,KEGG,KEGG,KEGG,KEGG,KEGG,KEGG,KEGG,KEGG,KEGG,KEGG,KEGG,KEGG,KEGG,KEGG,KEGG,KEGG,KEGG,KEGG,KEGG,KEGG,KEGG,KEGG,KEGG,KEGG,KEGG,KEGG,KEGG,KEGG,KEGG,KEGG,KEGG	HPD,UGT2B7,ASPDH,AFMID,UGT2A3,PDXK,ALPL,AK4,FECH,SHMT1,UGT1A6,UGT1A1,UGT1A4,RGN,ALAD,MOCS1,RDH13,PANK1,HAAO,PMM1,SPR,ALDH3A2,PNPO,GPHN,NQO1,ALDH2,AK7,AK3,KMO,ALDH1B1,AK5,NMNAT3
query_1	TRUE	0.000110425	29	2227	13	0.00583745	0.448276	KEGG:00020	KEGG	Citrate cycle (TCA cycle)	17860	3	KEGG:00000	KEGG,KEGG,KEGG,KEGG,KEGG,KEGG,KEGG,KEGG,KEGG,KEGG,KEGG,KEGG,KEGG	PCK1,OGDHL,ACO2,OGDH,PDHA1,PC,IDH2,PCK2,SDHA,SUCLG1,SDHD,SDHB,ACO1
query_1	TRUE	0.000180365	122	2227	32	0.0143691	0.262295	KEGG:04060	KEGG	Cytokine-cytokine receptor interaction	17860	253	KEGG:00000	KEGG,KEGG,KEGG,KEGG,KEGG,KEGG,KEGG,KEGG,KEGG,KEGG,KEGG,KEGG,KEGG,KEGG,KEGG,KEGG,KEGG,KEGG,KEGG,KEGG,KEGG,KEGG,KEGG,KEGG,KEGG,KEGG,KEGG,KEGG,KEGG,KEGG,KEGG,KEGG	CXCL14,CX3CL1,GDF15,IL1RL2,IL17RB,ACVR1B,IL1RL1,TNFRSF11B,IL17RE,PRLR,IL22RA1,EPOR,TNFSF10,THPO,IL13RA2,IL1R2,TNFRSF21,TNFSF13,GDF7,TGFBR2,CLCF1,CCL28,BMP6,TNFRSF14,IFNLR1,BMP5,RELL2,TNFRSF10A,BMP8B,BMPR1B,IL18,INHA
query_1	TRUE	0.000181055	19	2227	10	0.00449035	0.526316	KEGG:00790	KEGG	Folate biosynthesis	17860	125	KEGG:00000	KEGG,KEGG,KEGG,KEGG,KEGG,KEGG,KEGG,KEGG,KEGG,KEGG	PAH,ALPL,CBR1,MOCS1,SPR,QDPR,GPHN,PCBD1,MOCOS,AKR1C3
query_1	TRUE	0.000237884	35	2227	14	0.00628648	0.4	KEGG:00590	KEGG	Arachidonic acid metabolism	17860	92	KEGG:00000	KEGG,KEGG,KEGG,KEGG,KEGG,KEGG,KEGG,KEGG,KEGG,KEGG,KEGG,KEGG,KEGG,KEGG	CYP4F3,CYP2B6,GGT1,EPHX2,PLA2G4F,PTGR1,CBR1,PLA2G12B,CYP2C9,PLA2G6,AKR1C3,HPGD,GGT5,PTGS2
query_1	TRUE	0.000244012	31	2227	13	0.00583745	0.419355	KEGG:04913	KEGG	Ovarian steroidogenesis	17860	370	KEGG:00000	KEGG,KEGG,KEGG,KEGG,KEGG,KEGG,KEGG,KEGG,KEGG,KEGG,KEGG,KEGG,KEGG	PLA2G4F,ACOT2,ACOT4,INSR,LDLR,HSD3B2,ADCY4,ADCY9,AKR1C3,ADCY5,BMP6,ADCY8,PTGS2
query_1	TRUE	0.000252041	13	2227	8	0.00359228	0.615385	KEGG:00430	KEGG	Taurine and hypotaurine metabolism	17860	56	KEGG:00000	KEGG,KEGG,KEGG,KEGG,KEGG,KEGG,KEGG,KEGG	GGT6,GGT1,FMO4,FMO5,GAD1,FMO1,FMO2,GGT5
query_1	TRUE	0.000306813	260	2227	55	0.0246969	0.211538	KEGG:04151	KEGG	PI3K-Akt signaling pathway	17860	285	KEGG:00000	KEGG,KEGG,KEGG,KEGG,KEGG,KEGG,KEGG,KEGG,KEGG,KEGG,KEGG,KEGG,KEGG,KEGG,KEGG,KEGG,KEGG,KEGG,KEGG,KEGG,KEGG,KEGG,KEGG,KEGG,KEGG,KEGG,KEGG,KEGG,KEGG,KEGG,KEGG,KEGG,KEGG,KEGG,KEGG,KEGG,KEGG,KEGG,KEGG,KEGG,KEGG,KEGG,KEGG,KEGG,KEGG,KEGG,KEGG,KEGG,KEGG,KEGG,KEGG,KEGG,KEGG,KEGG,KEGG	EGF,PCK1,PPP2R3A,SGK2,FGFR3,TEK,COL4A3,FGF1,NR4A1,PRKAA2,NOS3,PCK2,PDGFB,BCL2L1,COL4A4,INSR,FGFR4,KDR,FLT1,LAMB4,ERBB2,ERBB3,PRLR,GNG7,ITGA2,CHAD,ITGA6,FLT4,VEGFA,FGF9,EPOR,EFNA1,SPP1,LAMA5,MAGI2,CASP9,ERBB4,NRTN,PRKCA,ITGA3,EPHA2,TGFA,MET,KIT,SGK1,ITGB4,KITLG,ITGB3,EGFR,NTRK1,PDGFA,LAMA1,ITGB8,PPP2R2B,THBS1
query_1	TRUE	0.000328271	54	2227	18	0.00808262	0.333333	KEGG:04972	KEGG	Pancreatic secretion	17860	403	KEGG:00000	KEGG,KEGG,KEGG,KEGG,KEGG,KEGG,KEGG,KEGG,KEGG,KEGG,KEGG,KEGG,KEGG,KEGG,KEGG,KEGG,KEGG,KEGG	CA2,FXYD2,SLC4A4,KCNQ1,ATP1B1,ATP1A1,PLA2G12B,ATP1B3,CHRM3,AMY2B,ADCY4,PRKCA,ADCY9,CEL,ADCY5,ATP2A3,ADCY8,ATP1B2
query_1	TRUE	0.000496542	14	2227	8	0.00359228	0.571429	KEGG:04614	KEGG	Renin-angiotensin system	17860	324	KEGG:00000	KEGG,KEGG,KEGG,KEGG,KEGG,KEGG,KEGG,KEGG	ACE2,ANPEP,AGTR1,MME,CTSA,ACE,ENPEP,AGT
query_1	TRUE	0.000666367	52	2227	17	0.00763359	0.326923	KEGG:04970	KEGG	Salivary secretion	17860	401	KEGG:00000	KEGG,KEGG,KEGG,KEGG,KEGG,KEGG,KEGG,KEGG,KEGG,KEGG,KEGG,KEGG,KEGG,KEGG,KEGG,KEGG,KEGG	FXYD2,ATP1B1,ATP1A1,NOS1,TRPV6,ATP1B3,CHRM3,ADRB1,ADRA1B,AMY2B,ADCY4,PRKCA,ADCY9,ADCY5,ADRA1A,ADCY8,ATP1B2
query_1	TRUE	0.000759275	104	2227	27	0.0121239	0.259615	KEGG:00230	KEGG	Purine metabolism	17860	22	KEGG:00000	KEGG,KEGG,KEGG,KEGG,KEGG,KEGG,KEGG,KEGG,KEGG,KEGG,KEGG,KEGG,KEGG,KEGG,KEGG,KEGG,KEGG,KEGG,KEGG,KEGG,KEGG,KEGG,KEGG,KEGG,KEGG,KEGG,KEGG	PNP,PDE2A,ENTPD5,LINC00473,AK4,GDA,NUDT16,NPR1,PDE1A,ENTPD8,ENPP3,AK7,AK3,PRPS2,GMPR,ENTPD3,ENPP4,ADCY4,ADCY9,ALLC,AK5,ENTPD2,PDE1C,ADCY5,PDE9A,PDE4A,ADCY8
query_1	TRUE	0.000886869	133	2227	32	0.0143691	0.240602	KEGG:04530	KEGG	Tight junction	17860	317	KEGG:00000	KEGG,KEGG,KEGG,KEGG,KEGG,KEGG,KEGG,KEGG,KEGG,KEGG,KEGG,KEGG,KEGG,KEGG,KEGG,KEGG,KEGG,KEGG,KEGG,KEGG,KEGG,KEGG,KEGG,KEGG,KEGG,KEGG,KEGG,KEGG,KEGG,KEGG,KEGG,KEGG	CLDN8,CLDN10,MARVELD3,CGNL1,CLDN2,CLDN16,CGN,LLGL2,CLDN19,CRB3,PRKAG2,TJP3,ACTR3C,PRKAA2,TUBA4A,PARD6B,PRKAB1,ACTN4,PRKCZ,ERBB2,NEDD4L,OCLN,MYH14,TJP2,CLDN7,MARVELD2,EZR,F11R,EPB41L4B,MYH11,PPP2R2B,MYL9
query_1	TRUE	0.000886869	240	2227	50	0.0224517	0.208333	KEGG:04010	KEGG	MAPK signaling pathway	17860	243	KEGG:00000	KEGG,KEGG,KEGG,KEGG,KEGG,KEGG,KEGG,KEGG,KEGG,KEGG,KEGG,KEGG,KEGG,KEGG,KEGG,KEGG,KEGG,KEGG,KEGG,KEGG,KEGG,KEGG,KEGG,KEGG,KEGG,KEGG,KEGG,KEGG,KEGG,KEGG,KEGG,KEGG,KEGG,KEGG,KEGG,KEGG,KEGG,KEGG,KEGG,KEGG,KEGG,KEGG,KEGG,KEGG,KEGG,KEGG,KEGG,KEGG,KEGG,KEGG	EGF,FGFR3,TEK,DUSP9,PLA2G4F,FGF1,NR4A1,PDGFB,INSR,FGFR4,KDR,MAP2K3,FLT1,MKNK2,ERBB2,ERBB3,MAP3K13,MECOM,FLT4,VEGFA,FGF9,GADD45A,GADD45B,CACNA1H,MAPT,EFNA1,RASGRF2,ERBB4,RPS6KA6,NRTN,PRKCA,EPHA2,TGFA,TGFBR2,MET,DUSP8,RPS6KA1,RASGRP1,KIT,DUSP5,KITLG,FOS,CACNA2D3,EGFR,CACNB2,NTRK1,PDGFA,GADD45G,DUSP1,RASGRF1
query_1	TRUE	0.00107655	64	2227	19	0.00853166	0.296875	KEGG:04512	KEGG	ECM-receptor interaction	17860	314	KEGG:00000	KEGG,KEGG,KEGG,KEGG,KEGG,KEGG,KEGG,KEGG,KEGG,KEGG,KEGG,KEGG,KEGG,KEGG,KEGG,KEGG,KEGG,KEGG,KEGG	COL4A3,SDC4,COL4A4,LAMB4,SDC1,ITGA2,CHAD,ITGA6,AGRN,SPP1,LAMA5,ITGA3,ITGB4,ITGB3,NPNT,FREM2,LAMA1,ITGB8,THBS1
query_1	TRUE	0.00115097	170	2227	38	0.0170633	0.223529	KEGG:04015	KEGG	Rap1 signaling pathway	17860	248	KEGG:00000	KEGG,KEGG,KEGG,KEGG,KEGG,KEGG,KEGG,KEGG,KEGG,KEGG,KEGG,KEGG,KEGG,KEGG,KEGG,KEGG,KEGG,KEGG,KEGG,KEGG,KEGG,KEGG,KEGG,KEGG,KEGG,KEGG,KEGG,KEGG,KEGG,KEGG,KEGG,KEGG,KEGG,KEGG,KEGG,KEGG,KEGG,KEGG	EGF,RAP1GAP,FGFR3,TEK,RAPGEF3,CDH1,FGF1,PDGFB,PARD6B,VAV3,INSR,FGFR4,KDR,MAP2K3,FLT1,PRKCZ,FLT4,BCAR1,VEGFA,FGF9,TLN2,EFNA1,MAGI2,ADCY4,PRKCA,ADCY9,EPHA2,MET,ADCY5,KIT,KITLG,ITGB3,F2RL3,EGFR,PDGFA,ADCY8,SKAP1,THBS1
query_1	TRUE	0.00115097	9	2227	6	0.00269421	0.666667	KEGG:04950	KEGG	Maturity onset diabetes of the young	17860	395	KEGG:00000	KEGG,KEGG,KEGG,KEGG,KEGG,KEGG	HNF4A,PKLR,HNF1A,SLC2A2,HNF4G,HNF1B
query_1	TRUE	0.00128407	55	2227	17	0.00763359	0.309091	KEGG:04918	KEGG	Thyroid hormone synthesis	17860	375	KEGG:00000	KEGG,KEGG,KEGG,KEGG,KEGG,KEGG,KEGG,KEGG,KEGG,KEGG,KEGG,KEGG,KEGG,KEGG,KEGG,KEGG,KEGG	IYD,FXYD2,LRP2,ATP1B1,ATP1A1,GPX3,SLC26A4,ATP1B3,ALB,ADCY4,PRKCA,ADCY9,ADCY5,PAX8,ADCY8,ATP1B2,DUOX2
query_1	TRUE	0.00133749	97	2227	25	0.0112259	0.257732	KEGG:04514	KEGG	Cell adhesion molecules	17860	315	KEGG:00000	KEGG,KEGG,KEGG,KEGG,KEGG,KEGG,KEGG,KEGG,KEGG,KEGG,KEGG,KEGG,KEGG,KEGG,KEGG,KEGG,KEGG,KEGG,KEGG,KEGG,KEGG,KEGG,KEGG,KEGG,KEGG	CLDN8,CLDN10,CLDN2,CLDN16,CDH1,SDC4,CLDN19,VTCN1,L1CAM,ESAM,SDC1,ITGA6,OCLN,CLDN7,F11R,SLITRK4,SELP,NEGR1,ICOSLG,CD34,NFASC,NTNG1,SELE,ITGB8,CNTN1
query_1	TRUE	0.00145963	28	2227	11	0.00493938	0.392857	KEGG:00640	KEGG	Propanoate metabolism	17860	109	KEGG:00000	KEGG,KEGG,KEGG,KEGG,KEGG,KEGG,KEGG,KEGG,KEGG,KEGG,KEGG	ALDH6A1,EHHADH,ACSS1,ABAT,ACADS,SUCLG1,ACACB,ECHS1,MLYCD,ACSS2,LDHB
query_1	TRUE	0.00145963	143	2227	33	0.0148181	0.230769	KEGG:05207	KEGG	Chemical carcinogenesis - receptor activation	17860	459	KEGG:00000	KEGG,KEGG,KEGG,KEGG,KEGG,KEGG,KEGG,KEGG,KEGG,KEGG,KEGG,KEGG,KEGG,KEGG,KEGG,KEGG,KEGG,KEGG,KEGG,KEGG,KEGG,KEGG,KEGG,KEGG,KEGG,KEGG,KEGG,KEGG,KEGG,KEGG,KEGG,KEGG,KEGG	EGF,PAQR5,GSTM3,PPARA,GSTA1,UGT2B7,NR1I3,PAQR7,CYP2B6,UGT2A3,EPHX2,UGT1A6,UGT1A1,UGT1A4,VDR,ADRB1,VEGFA,FGF9,EPHX3,KLF4,GSTM4,GSTM5,ADCY4,PGR,RPS6KA6,PRKCA,ADCY9,RPS6KA1,ADCY5,FOS,EGFR,ADCY8,KLF5
query_1	TRUE	0.00145963	28	2227	11	0.00493938	0.392857	KEGG:04973	KEGG	Carbohydrate digestion and absorption	17860	404	KEGG:00000	KEGG,KEGG,KEGG,KEGG,KEGG,KEGG,KEGG,KEGG,KEGG,KEGG,KEGG	FXYD2,ATP1B1,SLC2A2,ATP1A1,SLC5A1,ATP1B3,SLC37A4,AMY2B,HKDC1,ATP1B2,SLC2A5
query_1	TRUE	0.00145963	71	2227	20	0.00898069	0.28169	KEGG:05410	KEGG	Hypertrophic cardiomyopathy	17860	489	KEGG:00000	KEGG,KEGG,KEGG,KEGG,KEGG,KEGG,KEGG,KEGG,KEGG,KEGG,KEGG,KEGG,KEGG,KEGG,KEGG,KEGG,KEGG,KEGG,KEGG,KEGG	NOS1,PRKAG2,PRKAA2,PRKAB1,ITGA2,ITGA6,SNTA1,MYL3,ITGA3,ACE,AGT,ITGB4,ITGB3,CACNA2D3,CACNB2,EDN1,TNNC1,ATP2A3,LAMA1,ITGB8
query_1	TRUE	0.00228848	17	2227	8	0.00359228	0.470588	KEGG:00601	KEGG	Glycosphingolipid biosynthesis - lacto and neolacto series	17860	96	KEGG:00000	KEGG,KEGG,KEGG,KEGG,KEGG,KEGG,KEGG,KEGG	FUT6,ST3GAL6,GCNT2,A4GALT,B3GNT2,ST3GAL4,ABO,FUT1
query_1	TRUE	0.0022909	21	2227	9	0.00404131	0.428571	KEGG:04966	KEGG	Collecting duct acid secretion	17860	400	KEGG:00000	KEGG,KEGG,KEGG,KEGG,KEGG,KEGG,KEGG,KEGG,KEGG	ATP6V1C2,CLCNKB,CA2,ATP6V0A4,ATP6V0D2,ATP6V1G3,ATP6V1B1,ATP6V1A,ATP6V0E2
query_1	TRUE	0.0022909	48	2227	15	0.00673552	0.3125	KEGG:04640	KEGG	Hematopoietic cell lineage	17860	333	KEGG:00000	KEGG,KEGG,KEGG,KEGG,KEGG,KEGG,KEGG,KEGG,KEGG,KEGG,KEGG,KEGG,KEGG,KEGG,KEGG	ANPEP,MME,CD9,ITGA2,ITGA6,EPOR,THPO,IL1R2,ITGA3,KIT,KITLG,ITGB3,CD34,CR1L,CR1
query_1	TRUE	0.0022909	53	2227	16	0.00718455	0.301887	KEGG:04721	KEGG	Synaptic vesicle cycle	17860	351	KEGG:00000	KEGG,KEGG,KEGG,KEGG,KEGG,KEGG,KEGG,KEGG,KEGG,KEGG,KEGG,KEGG,KEGG,KEGG,KEGG,KEGG	ATP6V1C2,ATP6V0A4,SLC6A12,UNC13B,ATP6V0D2,SLC6A13,SLC1A1,ATP6V1G3,ATP6V1B1,ATP6V1A,UNC13C,STX3,ATP6V0E2,ATP6V0B,SLC6A4,RAB3A
query_1	TRUE	0.00284053	54	2227	16	0.00718455	0.296296	KEGG:04727	KEGG	GABAergic synapse	17860	357	KEGG:00000	KEGG,KEGG,KEGG,KEGG,KEGG,KEGG,KEGG,KEGG,KEGG,KEGG,KEGG,KEGG,KEGG,KEGG,KEGG,KEGG	SLC6A12,SLC6A13,PLCL1,GABARAPL1,GABRA2,ABAT,GAD1,GLS,GNG7,GPHN,ADCY4,PRKCA,ADCY9,ADCY5,ADCY8,SLC38A3
query_1	TRUE	0.00319363	92	2227	23	0.0103278	0.25	KEGG:04270	KEGG	Vascular smooth muscle contraction	17860	298	KEGG:00000	KEGG,KEGG,KEGG,KEGG,KEGG,KEGG,KEGG,KEGG,KEGG,KEGG,KEGG,KEGG,KEGG,KEGG,KEGG,KEGG,KEGG,KEGG,KEGG,KEGG,KEGG,KEGG,KEGG	RAMP3,PLA2G4F,PLA2G12B,AGTR1,ADM2,MYH14,ADRA1B,NPR1,ADCY4,PRKCQ,ADM,PRKCA,PLA2G6,ADCY9,PPP1R14A,AGT,ADCY5,EDN1,ADRA1A,ADCY8,MYH11,MYL9,AVPR1A
query_1	TRUE	0.00350474	50	2227	15	0.00673552	0.3	KEGG:00983	KEGG	Drug metabolism - other enzymes	17860	157	KEGG:00000	KEGG,KEGG,KEGG,KEGG,KEGG,KEGG,KEGG,KEGG,KEGG,KEGG,KEGG,KEGG,KEGG,KEGG,KEGG	UPB1,DPYS,GSTM3,GSTA1,UGT2B7,UGT2A3,UPP2,UGT1A6,UGT1A1,UGT1A4,CES2,TPMT,GSTM4,CDA,GSTM5
query_1	TRUE	0.00361972	71	2227	19	0.00853166	0.267606	KEGG:04925	KEGG	Aldosterone synthesis and secretion	17860	382	KEGG:00000	KEGG,KEGG,KEGG,KEGG,KEGG,KEGG,KEGG,KEGG,KEGG,KEGG,KEGG,KEGG,KEGG,KEGG,KEGG,KEGG,KEGG,KEGG,KEGG	ATP1B1,ATP1A1,PDE2A,NR4A1,AGTR1,ATP1B3,LDLR,NR4A2,NPR1,HSD3B2,CACNA1H,ADCY4,PRKCA,ADCY9,AGT,ADCY5,CAMK1G,ADCY8,ATP1B2
query_1	TRUE	0.00398183	77	2227	20	0.00898069	0.25974	KEGG:05414	KEGG	Dilated cardiomyopathy	17860	491	KEGG:00000	KEGG,KEGG,KEGG,KEGG,KEGG,KEGG,KEGG,KEGG,KEGG,KEGG,KEGG,KEGG,KEGG,KEGG,KEGG,KEGG,KEGG,KEGG,KEGG,KEGG	NOS1,ITGA2,ITGA6,ADRB1,SNTA1,MYL3,ADCY4,ADCY9,ITGA3,AGT,ADCY5,ITGB4,ITGB3,CACNA2D3,CACNB2,TNNC1,ATP2A3,ADCY8,LAMA1,ITGB8
query_1	TRUE	0.00506008	84	2227	21	0.00942973	0.25	KEGG:04928	KEGG	Parathyroid hormone synthesis, secretion and action	17860	385	KEGG:00000	KEGG,KEGG,KEGG,KEGG,KEGG,KEGG,KEGG,KEGG,KEGG,KEGG,KEGG,KEGG,KEGG,KEGG,KEGG,KEGG,KEGG,KEGG,KEGG,KEGG,KEGG	SLC34A1,KL,PTH1R,CASR,SLC34A3,GATA3,GCM1,HBEGF,CYP27B1,VDR,MMP24,NR4A2,ADCY4,PRKCA,ADCY9,EGR1,ADCY5,FOS,EGFR,PDE4A,ADCY8
query_1	TRUE	0.00514787	179	2227	37	0.0166143	0.206704	KEGG:04014	KEGG	Ras signaling pathway	17860	247	KEGG:00000	KEGG,KEGG,KEGG,KEGG,KEGG,KEGG,KEGG,KEGG,KEGG,KEGG,KEGG,KEGG,KEGG,KEGG,KEGG,KEGG,KEGG,KEGG,KEGG,KEGG,KEGG,KEGG,KEGG,KEGG,KEGG,KEGG,KEGG,KEGG,KEGG,KEGG,KEGG,KEGG,KEGG,KEGG,KEGG,KEGG,KEGG	EGF,FGFR3,TEK,PLCG2,PLA2G4F,FGF1,PLA2G12B,PDGFB,BCL2L1,INSR,FGFR4,KDR,FLT1,KSR2,PLA1A,GNG7,PAK6,PAK4,FLT4,VEGFA,RALBP1,FGF9,RASAL1,EFNA1,RASGRF2,PRKCA,PLA2G6,EPHA2,TGFA,MET,RASGRP1,KIT,KITLG,EGFR,NTRK1,PDGFA,RASGRF1
query_1	TRUE	0.00523824	42	2227	13	0.00583745	0.309524	KEGG:04923	KEGG	Regulation of lipolysis in adipocytes	17860	380	KEGG:00000	KEGG,KEGG,KEGG,KEGG,KEGG,KEGG,KEGG,KEGG,KEGG,KEGG,KEGG,KEGG,KEGG	PTGER3,AQP7,NPY1R,PNPLA2,INSR,ADRB1,NPR1,MGLL,ADCY4,ADCY9,ADCY5,ADCY8,PTGS2
query_1	TRUE	0.00648786	38	2227	12	0.00538841	0.315789	KEGG:04961	KEGG	Endocrine and other factor-regulated calcium reabsorption	17860	397	KEGG:00000	KEGG,KEGG,KEGG,KEGG,KEGG,KEGG,KEGG,KEGG,KEGG,KEGG,KEGG,KEGG	CALB1,KL,FXYD2,ATP1B1,ATP1A1,PTH1R,BDKRB2,ATP1B3,VDR,PRKCA,ADCY9,ATP1B2
query_1	TRUE	0.0067362	115	2227	26	0.0116749	0.226087	KEGG:04261	KEGG	Adrenergic signaling in cardiomyocytes	17860	297	KEGG:00000	KEGG,KEGG,KEGG,KEGG,KEGG,KEGG,KEGG,KEGG,KEGG,KEGG,KEGG,KEGG,KEGG,KEGG,KEGG,KEGG,KEGG,KEGG,KEGG,KEGG,KEGG,KEGG,KEGG,KEGG,KEGG,KEGG	FXYD2,PPP2R3A,KCNQ1,ATP1B1,ATP1A1,PPP1R1A,RAPGEF3,AGTR1,ATP1B3,ADRB1,ADRA1B,KCNE1,MYL3,ADCY4,PRKCA,ADCY9,AGT,ADCY5,CACNA2D3,CACNB2,TNNC1,ADRA1A,ATP2A3,ADCY8,ATP1B2,PPP2R2B
query_1	TRUE	0.00738751	16	2227	7	0.00314324	0.4375	KEGG:04977	KEGG	Vitamin digestion and absorption	17860	408	KEGG:00000	KEGG,KEGG,KEGG,KEGG,KEGG,KEGG,KEGG	CUBN,SLC23A1,SLC52A3,SLC19A3,TCN2,SLC19A2,FOLH1
query_1	TRUE	0.00743415	3	2227	3	0.0013471	1	KEGG:00400	KEGG	Phenylalanine, tyrosine and tryptophan biosynthesis	17860	49	KEGG:00000	KEGG,KEGG,KEGG	PAH,GOT1,GOT2
query_1	TRUE	0.00791666	44	2227	13	0.00583745	0.295455	KEGG:05110	KEGG	Vibrio cholerae infection	17860	424	KEGG:00000	KEGG,KEGG,KEGG,KEGG,KEGG,KEGG,KEGG,KEGG,KEGG,KEGG,KEGG,KEGG,KEGG	ATP6V1C2,ATP6V0A4,ATP6V0D2,KCNQ1,PLCG2,ATP6V1G3,ATP6V1B1,ATP6V1A,ATP6V0E2,TJP2,ATP6V0B,PRKCA,ADCY9
query_1	TRUE	0.00835524	123	2227	27	0.0121239	0.219512	KEGG:04022	KEGG	cGMP-PKG signaling pathway	17860	251	KEGG:00000	KEGG,KEGG,KEGG,KEGG,KEGG,KEGG,KEGG,KEGG,KEGG,KEGG,KEGG,KEGG,KEGG,KEGG,KEGG,KEGG,KEGG,KEGG,KEGG,KEGG,KEGG,KEGG,KEGG,KEGG,KEGG,KEGG,KEGG	KNG1,FXYD2,ATP1B1,ATP1A1,BDKRB2,PDE2A,ADRA2B,AGTR1,NOS3,CNGA1,INSR,ATP1B3,SLC25A4,ADRB1,ADRA1B,SLC25A5,EDNRB,NPR1,PPIF,ADCY4,ADCY9,ADCY5,ADRA1A,ATP2A3,ADCY8,ATP1B2,MYL9
query_1	TRUE	0.0100679	225	2227	43	0.0193085	0.191111	KEGG:05012	KEGG	Parkinson disease	17860	412	KEGG:00000	KEGG,KEGG,KEGG,KEGG,KEGG,KEGG,KEGG,KEGG,KEGG,KEGG,KEGG,KEGG,KEGG,KEGG,KEGG,KEGG,KEGG,KEGG,KEGG,KEGG,KEGG,KEGG,KEGG,KEGG,KEGG,KEGG,KEGG,KEGG,KEGG,KEGG,KEGG,KEGG,KEGG,KEGG,KEGG,KEGG,KEGG,KEGG,KEGG,KEGG,KEGG,KEGG,KEGG	SLC39A5,MT-CYB,MAOA,MT-ND1,MT-CO1,MT-ND2,MT-ND5,MT-ND4,MT-CO3,MT-ND4L,MT-ATP8,PARK2,MT-ATP6,MT-CO2,MT-ND3,PINK1,TUBA4A,SDHA,SLC39A4,BCL2L1,NDUFV1,NDUFS8,SLC39A13,SDHD,SDHB,SLC25A4,CYC1,KLC3,COX5A,SLC25A5,COX8A,MAPT,MAOB,PPIF,MT-ND6,COX7B,COX7A1,LRRK2,UQCRFS1,CASP9,COX5B,ADCY5,DUSP1
query_1	TRUE	0.0106013	17	2227	7	0.00314324	0.411765	KEGG:00785	KEGG	Lipoic acid metabolism	17860	124	KEGG:00000	KEGG,KEGG,KEGG,KEGG,KEGG,KEGG,KEGG	GLDC,OGDHL,OGDH,PDHA1,DHTKD1,AMT,ACSM1
query_1	TRUE	0.0107233	413	2227	71	0.0318815	0.171913	KEGG:05200	KEGG	Pathways in cancer	17860	453	KEGG:00000	KEGG,KEGG,KEGG,KEGG,KEGG,KEGG,KEGG,KEGG,KEGG,KEGG,KEGG,KEGG,KEGG,KEGG,KEGG,KEGG,KEGG,KEGG,KEGG,KEGG,KEGG,KEGG,KEGG,KEGG,KEGG,KEGG,KEGG,KEGG,KEGG,KEGG,KEGG,KEGG,KEGG,KEGG,KEGG,KEGG,KEGG,KEGG,KEGG,KEGG,KEGG,KEGG,KEGG,KEGG,KEGG,KEGG,KEGG,KEGG,KEGG,KEGG,KEGG,KEGG,KEGG,KEGG,KEGG,KEGG,KEGG,KEGG,KEGG,KEGG,KEGG,KEGG,KEGG,KEGG,KEGG,KEGG,KEGG,KEGG,KEGG,KEGG,KEGG	EGF,KNG1,PTGER3,GSTM3,FGFR3,GSTA1,BDKRB2,PLCG2,PTGER1,COL4A3,CDH1,FGF1,AGTR1,NOTCH4,PDGFB,BCL2L1,COL4A4,EPAS1,FGFR4,ZBTB16,LAMB4,ERBB2,PPARG,GNG7,ITGA2,TRAF4,ITGA6,MECOM,FLT4,VEGFA,BCR,RALBP1,FGF9,EDNRB,EPOR,GADD45A,GADD45B,SHH,JUP,NQO1,GSTM4,FZD5,LAMA5,CASP9,GSTM5,BDKRB1,FZD4,ADCY4,PRKCA,ADCY9,ITGA3,TGFA,NOS2,TGFBR2,MET,AGT,RASGRP1,ADCY5,KIT,KITLG,FOS,F2RL3,EGFR,PAX8,NTRK1,EDN1,PDGFA,GADD45G,ADC…
query_1	TRUE	0.0107572	51	2227	14	0.00628648	0.27451	KEGG:05323	KEGG	Rheumatoid arthritis	17860	485	KEGG:00000	KEGG,KEGG,KEGG,KEGG,KEGG,KEGG,KEGG,KEGG,KEGG,KEGG,KEGG,KEGG,KEGG,KEGG	ATP6V1C2,ATP6V0A4,ATP6V0D2,TEK,ATP6V1G3,ATP6V1B1,ATP6V1A,FLT1,ATP6V0E2,ATP6V0B,VEGFA,TNFSF13,FOS,IL18
query_1	TRUE	0.0107572	90	2227	21	0.00942973	0.233333	KEGG:04066	KEGG	HIF-1 signaling pathway	17860	257	KEGG:00000	KEGG,KEGG,KEGG,KEGG,KEGG,KEGG,KEGG,KEGG,KEGG,KEGG,KEGG,KEGG,KEGG,KEGG,KEGG,KEGG,KEGG,KEGG,KEGG,KEGG,KEGG	EGF,ALDOB,TEK,PLCG2,PDHA1,NOS3,INSR,FLT1,MKNK2,ERBB2,ENO1,VEGFA,HKDC1,ALDOC,LDHB,PFKFB3,PFKP,PRKCA,NOS2,EGFR,EDN1
query_1	TRUE	0.0107572	26	2227	9	0.00404131	0.346154	KEGG:00030	KEGG	Pentose phosphate pathway	17860	4	KEGG:00000	KEGG,KEGG,KEGG,KEGG,KEGG,KEGG,KEGG,KEGG,KEGG	ALDOB,FBP1,RBKS,RGN,IDNK,GLYCTK,ALDOC,PRPS2,PFKP
query_1	TRUE	0.0130673	171	2227	34	0.0152672	0.19883	KEGG:04510	KEGG	Focal adhesion	17860	313	KEGG:00000	KEGG,KEGG,KEGG,KEGG,KEGG,KEGG,KEGG,KEGG,KEGG,KEGG,KEGG,KEGG,KEGG,KEGG,KEGG,KEGG,KEGG,KEGG,KEGG,KEGG,KEGG,KEGG,KEGG,KEGG,KEGG,KEGG,KEGG,KEGG,KEGG,KEGG,KEGG,KEGG,KEGG,KEGG	EGF,COL4A3,PDGFB,COL4A4,ACTN4,VAV3,KDR,FLT1,LAMB4,ERBB2,DIAPH1,PAK6,ITGA2,CHAD,PAK4,ITGA6,FLT4,BCAR1,VEGFA,TLN2,SPP1,LAMA5,PRKCA,ITGA3,MET,ITGB4,ITGB3,EGFR,PDGFA,LAMA1,ITGB8,RASGRF1,MYL9,THBS1
query_1	TRUE	0.014225	58	2227	15	0.00673552	0.258621	KEGG:04911	KEGG	Insulin secretion	17860	368	KEGG:00000	KEGG,KEGG,KEGG,KEGG,KEGG,KEGG,KEGG,KEGG,KEGG,KEGG,KEGG,KEGG,KEGG,KEGG,KEGG	FXYD2,ATP1B1,SLC2A2,ATP1A1,TRPM4,ATP1B3,CHRM3,PCLO,RAB3A,ADCY4,PRKCA,ADCY9,ADCY5,ADCY8,ATP1B2
query_1	TRUE	0.0149739	10	2227	5	0.00224517	0.5	KEGG:00910	KEGG	Nitrogen metabolism	17860	139	KEGG:00000	KEGG,KEGG,KEGG,KEGG,KEGG	CA12,CA2,CA4,GLUD1,GLUD2
query_1	TRUE	0.0196109	60	2227	15	0.00673552	0.25	KEGG:05230	KEGG	Central carbon metabolism in cancer	17860	478	KEGG:00000	KEGG,KEGG,KEGG,KEGG,KEGG,KEGG,KEGG,KEGG,KEGG,KEGG,KEGG,KEGG,KEGG,KEGG,KEGG	FGFR3,SLC2A2,PDHA1,IDH2,ERBB2,GLS,HKDC1,LDHB,PFKP,SLC1A5,MET,KIT,EGFR,NTRK1,PGAM2
query_1	TRUE	0.0199583	19	2227	7	0.00314324	0.368421	KEGG:00062	KEGG	Fatty acid elongation	17860	10	KEGG:00000	KEGG,KEGG,KEGG,KEGG,KEGG,KEGG,KEGG	ELOVL7,ACAA2,ACOT2,HADH,ACOT4,ECHS1,ACOT7
query_1	TRUE	0.0211431	55	2227	14	0.00628648	0.254545	KEGG:00310	KEGG	Lysine degradation	17860	34	KEGG:00000	KEGG,KEGG,KEGG,KEGG,KEGG,KEGG,KEGG,KEGG,KEGG,KEGG,KEGG,KEGG,KEGG,KEGG	BBOX1,EHHADH,ACAT1,PRDM16,PIPOX,DHTKD1,HADH,ECHS1,MECOM,GCDH,ALDH3A2,HYKK,ALDH2,ALDH1B1
query_1	TRUE	0.0215853	78	2227	18	0.00808262	0.230769	KEGG:04750	KEGG	Inflammatory mediator regulation of TRP channels	17860	364	KEGG:00000	KEGG,KEGG,KEGG,KEGG,KEGG,KEGG,KEGG,KEGG,KEGG,KEGG,KEGG,KEGG,KEGG,KEGG,KEGG,KEGG,KEGG,KEGG	KNG1,TRPV4,BDKRB2,PLCG2,PLA2G4F,F2RL1,MAP2K3,BDKRB1,ADCY4,PRKCQ,PRKCA,PLA2G6,ADCY9,ADCY5,NTRK1,P2RY2,ADCY8,ASIC2
query_1	TRUE	0.021872	184	2227	35	0.0157162	0.190217	KEGG:04810	KEGG	Regulation of actin cytoskeleton	17860	365	KEGG:00000	KEGG,KEGG,KEGG,KEGG,KEGG,KEGG,KEGG,KEGG,KEGG,KEGG,KEGG,KEGG,KEGG,KEGG,KEGG,KEGG,KEGG,KEGG,KEGG,KEGG,KEGG,KEGG,KEGG,KEGG,KEGG,KEGG,KEGG,KEGG,KEGG,KEGG,KEGG,KEGG,KEGG,KEGG,KEGG	EGF,KNG1,CYFIP2,FGFR3,BDKRB2,SCIN,FGF1,ACTR3C,PDGFB,BAIAP2,ACTN4,VAV3,FGFR4,CHRM3,DIAPH1,PAK6,ITGA2,PAK4,ITGA6,MYH14,BCAR1,EZR,FGF9,BDKRB1,C9,ITGA3,FGD3,ITGB4,ITGB3,EGFR,PDGFA,ITGB8,MYH11,MYL9,C6
query_1	TRUE	0.021872	34	2227	10	0.00449035	0.294118	KEGG:04979	KEGG	Cholesterol metabolism	17860	410	KEGG:00000	KEGG,KEGG,KEGG,KEGG,KEGG,KEGG,KEGG,KEGG,KEGG,KEGG	ANGPTL3,LRP2,LRPAP1,LPL,ABCG8,LDLR,CIDEB,NCEH1,SORT1,LIPC
query_1	TRUE	0.021872	34	2227	10	0.00449035	0.294118	KEGG:02010	KEGG	ABC transporters	17860	199	KEGG:00000	KEGG,KEGG,KEGG,KEGG,KEGG,KEGG,KEGG,KEGG,KEGG,KEGG	DEFB1,ABCC6,ABCC2,ABCD3,ABCG8,ABCB1,ABCA3,ABCA5,ABCA13,ABCA8
query_1	TRUE	0.0238761	45	2227	12	0.00538841	0.266667	KEGG:00480	KEGG	Glutathione metabolism	17860	61	KEGG:00000	KEGG,KEGG,KEGG,KEGG,KEGG,KEGG,KEGG,KEGG,KEGG,KEGG,KEGG,KEGG	GSTM3,GGT6,GSTA1,ANPEP,GPX3,GGT1,IDH2,OPLAH,GSTK1,GSTM4,GSTM5,GGT5
query_1	TRUE	0.0256536	20	2227	7	0.00314324	0.35	KEGG:00770	KEGG	Pantothenate and CoA biosynthesis	17860	122	KEGG:00000	KEGG,KEGG,KEGG,KEGG,KEGG,KEGG,KEGG	UPB1,DPYS,PANK1,ALDH3A2,ENPP3,ALDH2,ALDH1B1
query_1	TRUE	0.0304976	81	2227	18	0.00808262	0.222222	KEGG:04922	KEGG	Glucagon signaling pathway	17860	379	KEGG:00000	KEGG,KEGG,KEGG,KEGG,KEGG,KEGG,KEGG,KEGG,KEGG,KEGG,KEGG,KEGG,KEGG,KEGG,KEGG,KEGG,KEGG,KEGG	PCK1,GCGR,PPARA,FBP1,SLC2A2,CPT1A,PDHA1,PRKAG2,PPARGC1A,PRKAA2,PCK2,PRKAB1,SIK1,ACACB,LDHB,PFKP,PFKFB1,PGAM2
query_1	TRUE	0.0311095	118	2227	24	0.0107768	0.20339	KEGG:05418	KEGG	Fluid shear stress and atherosclerosis	17860	495	KEGG:00000	KEGG,KEGG,KEGG,KEGG,KEGG,KEGG,KEGG,KEGG,KEGG,KEGG,KEGG,KEGG,KEGG,KEGG,KEGG,KEGG,KEGG,KEGG,KEGG,KEGG,KEGG,KEGG,KEGG,KEGG	GSTM3,TRPV4,GSTA1,SDC4,PRKAA2,ASS1,NOS3,PDGFB,KDR,PRKCZ,SDC1,VEGFA,KLF2,IL1R2,NQO1,GSTM4,GSTM5,ITGB3,FOS,EDN1,PDGFA,DUSP1,SELE,BMPR1B
query_1	TRUE	0.0332663	94	2227	20	0.00898069	0.212766	KEGG:04931	KEGG	Insulin resistance	17860	388	KEGG:00000	KEGG,KEGG,KEGG,KEGG,KEGG,KEGG,KEGG,KEGG,KEGG,KEGG,KEGG,KEGG,KEGG,KEGG,KEGG,KEGG,KEGG,KEGG,KEGG,KEGG	PCK1,SLC27A2,PPARA,SLC2A2,CPT1A,PRKAG2,PPARGC1A,PRKAA2,NOS3,PCK2,PRKAB1,MLXIPL,INSR,PRKCZ,ACACB,TBC1D4,RPS6KA6,PRKCQ,AGT,RPS6KA1
query_1	TRUE	0.0332663	119	2227	24	0.0107768	0.201681	KEGG:04072	KEGG	Phospholipase D signaling pathway	17860	261	KEGG:00000	KEGG,KEGG,KEGG,KEGG,KEGG,KEGG,KEGG,KEGG,KEGG,KEGG,KEGG,KEGG,KEGG,KEGG,KEGG,KEGG,KEGG,KEGG,KEGG,KEGG,KEGG,KEGG,KEGG,KEGG	EGF,PLCG2,PLA2G4F,RAPGEF3,AGTR1,AGPAT3,PDGFB,AGPAT2,GRM1,INSR,ADCY4,PRKCA,ADCY9,AGT,ADCY5,KIT,KITLG,DGKG,PTGFR,EGFR,PPAP2A,PDGFA,ADCY8,AVPR1A
query_1	TRUE	0.0332663	31	2227	9	0.00404131	0.290323	KEGG:04710	KEGG	Circadian rhythm	17860	345	KEGG:00000	KEGG,KEGG,KEGG,KEGG,KEGG,KEGG,KEGG,KEGG,KEGG	RORC,PRKAG2,PRKAA2,PRKAB1,PER1,BHLHE40,CRY2,PER3,NR1D1
query_1	TRUE	0.0332663	138	2227	27	0.0121239	0.195652	KEGG:04814	KEGG	Motor proteins	17860	366	KEGG:00000	KEGG,KEGG,KEGG,KEGG,KEGG,KEGG,KEGG,KEGG,KEGG,KEGG,KEGG,KEGG,KEGG,KEGG,KEGG,KEGG,KEGG,KEGG,KEGG,KEGG,KEGG,KEGG,KEGG,KEGG,KEGG,KEGG,KEGG	KIFC3,KIF12,KIF13B,TUBA4A,KIF1C,KIF26A,MYO3B,DNAI1,MYO6,MYO1C,MYO9A,MYO5B,KLC3,MYH14,KIFC2,MYL3,DNAH7,MYO15B,MYH8,KIF17,MYO7A,TNNC1,DNAH5,KIF6,MYH11,MYL9,DNAH6
query_1	TRUE	0.041746	43	2227	11	0.00493938	0.255814	KEGG:04927	KEGG	Cortisol synthesis and secretion	17860	384	KEGG:00000	KEGG,KEGG,KEGG,KEGG,KEGG,KEGG,KEGG,KEGG,KEGG,KEGG,KEGG	NR4A1,AGTR1,LDLR,HSD3B2,CACNA1H,NCEH1,ADCY4,ADCY9,AGT,ADCY5,ADCY8
query_1	TRUE	0.0419566	72	2227	16	0.00718455	0.222222	KEGG:00564	KEGG	Glycerophospholipid metabolism	17860	88	KEGG:00000	KEGG,KEGG,KEGG,KEGG,KEGG,KEGG,KEGG,KEGG,KEGG,KEGG,KEGG,KEGG,KEGG,KEGG,KEGG,KEGG	GPD1,PLA2G4F,ETNK2,PLA2G12B,PCYT2,AGPAT3,AGPAT2,LPIN3,PLA1A,GPD1L,ETNPPL,PLA2G6,DGKG,CDS1,PNPLA7,PPAP2A
query_1	TRUE	0.0421956	109	2227	22	0.00987876	0.201835	KEGG:04723	KEGG	Retrograde endocannabinoid signaling	17860	353	KEGG:00000	KEGG,KEGG,KEGG,KEGG,KEGG,KEGG,KEGG,KEGG,KEGG,KEGG,KEGG,KEGG,KEGG,KEGG,KEGG,KEGG,KEGG,KEGG,KEGG,KEGG,KEGG,KEGG	KCNJ3,MT-ND1,MT-ND2,MT-ND5,MT-ND4,MT-ND4L,GABRA2,MT-ND3,FAAH,NDUFV1,NDUFS8,GRM1,GNG7,ABHD6,MT-ND6,MGLL,ADCY4,PRKCA,ADCY9,ADCY5,ADCY8,PTGS2
query_1	TRUE	0.0422101	141	2227	27	0.0121239	0.191489	KEGG:04024	KEGG	cAMP signaling pathway	17860	252	KEGG:00000	KEGG,KEGG,KEGG,KEGG,KEGG,KEGG,KEGG,KEGG,KEGG,KEGG,KEGG,KEGG,KEGG,KEGG,KEGG,KEGG,KEGG,KEGG,KEGG,KEGG,KEGG,KEGG,KEGG,KEGG,KEGG,KEGG,KEGG	FXYD2,PTGER3,PPARA,ATP1B1,ATP1A1,NPY1R,LINC00473,RAPGEF3,CNGA1,VAV3,ATP1B3,ADRB1,NPR1,SSTR2,ADCY4,ADCY9,ADCY5,FOS,EDN1,HCN2,PDE4A,ATP2A3,ADCY8,SSTR5,ATP1B2,MYL9,SSTR1
query_1	TRUE	0.0426773	103	2227	21	0.00942973	0.203883	KEGG:04936	KEGG	Alcoholic liver disease	17860	393	KEGG:00000	KEGG,KEGG,KEGG,KEGG,KEGG,KEGG,KEGG,KEGG,KEGG,KEGG,KEGG,KEGG,KEGG,KEGG,KEGG,KEGG,KEGG,KEGG,KEGG,KEGG,KEGG	PPARA,FABP1,ADH6,CPT1A,PRKAG2,PPARGC1A,PRKAA2,ACADVL,LPIN3,PRKAB1,MAP2K3,ACACB,SCD5,ACADM,MLYCD,ALDH3A2,ALDH2,TICAM1,ALDH1B1,NOX4,C4A
query_1	TRUE	0.0447025	5	2227	3	0.0013471	0.6	KEGG:00470	KEGG	D-Amino acid metabolism	17860	60	KEGG:00000	KEGG,KEGG,KEGG	DAO,GLS,DDO
query_1	TRUE	0.0465874	104	2227	21	0.00942973	0.201923	KEGG:04152	KEGG	AMPK signaling pathway	17860	286	KEGG:00000	KEGG,KEGG,KEGG,KEGG,KEGG,KEGG,KEGG,KEGG,KEGG,KEGG,KEGG,KEGG,KEGG,KEGG,KEGG,KEGG,KEGG,KEGG,KEGG,KEGG,KEGG	PCK1,PPP2R3A,HNF4A,FBP1,CPT1A,PRKAG2,PPARGC1A,PRKAA2,PCK2,PRKAB1,INSR,ACACB,PPARG,SCD5,PFKFB2,MLYCD,PFKFB3,PFKP,PFKFB1,ADRA1A,PPP2R2B
query_1	TRUE	0.0496414	28	2227	8	0.00359228	0.285714	KEGG:05144	KEGG	Malaria	17860	436	KEGG:00000	KEGG,KEGG,KEGG,KEGG,KEGG,KEGG,KEGG,KEGG	SDC1,SELP,MET,CR1L,SELE,THBS1,IL18,CR1
