# Supplementary material for: Novel epigenetic signature, molecular subtypes and insights into IGF2/H19 dysregulation in Wilms tumour revealed by methylomic and transcriptomic profiling
Source: Research Square preprint supplement (doi:10.21203/rs.3.rs-8030860/v1), 2025-11-11
Supplement: Supplementary file 3 [file 3463c2619a1e94e6178dfa2d.xlsx]

## Sheet: Table S9_Corr exp-met
Gene	cor	adjPVal	log2FoldChange	padj	MeanDiff	Status
A4GALT	-0.744037	4.82297e-08	-2.28228	2.5865e-15	0.0458513	Down-Hyper
ABCA8	-0.625165	1.66056e-05	-1.41835	0.00795399	0.0107492	Down-Hyper
ABHD14B	-0.578771	9.36878e-05	-1.2527	3.4544e-18	0.049889	Down-Hyper
ACADL	-0.601108	4.24974e-05	-5.10375	6.61504e-21	0.0242692	Down-Hyper
ACMSD	-0.651873	5.59363e-06	-6.56711	1.1238e-35	0.120508	Down-Hyper
ACOT4	-0.485015	0.00152743	-2.53804	7.24222e-17	0.0590479	Down-Hyper
ACSF2	-0.475064	0.00196091	-2.77476	6.29719e-24	0.0674122	Down-Hyper
ACSL1	-0.730567	1.08361e-07	-2.32589	1.51621e-21	0.123084	Down-Hyper
ACSS2	-0.690075	9.53164e-07	-1.52827	7.48164e-09	0.13114	Down-Hyper
ACY1	-0.627594	1.51351e-05	-2.27593	1.02838e-16	0.0602879	Down-Hyper
ADAMTS16	-0.573207	0.000112879	-2.16552	2.12784e-08	0.200383	Down-Hyper
ADAMTS9-AS1	-0.757444	2.07362e-08	-4.04355	3.35149e-39	0.187766	Down-Hyper
ADH6	-0.786248	2.73284e-09	-5.9266	2.11002e-33	0.293544	Down-Hyper
ADHFE1	-0.665942	2.99626e-06	-1.56845	3.38617e-15	0.167517	Down-Hyper
ADIRF	-0.595387	5.22815e-05	-4.16578	4.62387e-23	0.0304043	Down-Hyper
ADRA2B	-0.526056	0.000488948	-2.64682	1.78732e-23	0.10696	Down-Hyper
AGMAT	-0.522434	0.000541779	-6.84877	9.02743e-82	0.0471711	Down-Hyper
AGPAT3	-0.485523	0.00150807	-1.11776	5.46225e-21	0.0301588	Down-Hyper
AGT	-0.630605	1.34706e-05	-2.03211	4.78799e-06	0.0329475	Down-Hyper
AGXT2	-0.783911	3.12592e-09	-8.93341	5.18806e-48	0.0659305	Down-Hyper
AKAP1	-0.82253	1.6649e-10	-1.42186	1.63706e-11	0.0838235	Down-Hyper
AKR1E2	-0.664755	3.17414e-06	-1.0518	0.00747701	0.248832	Down-Hyper
ALAD	-0.544305	0.000282993	-1.50329	2.00016e-21	0.0321767	Down-Hyper
ALDH1B1	-0.568859	0.000129255	-1.10841	1.70333e-06	0.0216482	Down-Hyper
ALDH2	-0.551361	0.000228868	-1.07098	8.88079e-09	0.0677069	Down-Hyper
ALDH3B1	-0.605593	3.58002e-05	-1.12932	0.00352305	0.00297463	Down-Hyper
ALDH4A1	-0.787821	2.47767e-09	-4.36907	8.19185e-66	0.142338	Down-Hyper
ALDH8A1	-0.647776	6.67443e-06	-4.24608	9.39642e-50	0.130599	Down-Hyper
ALPK3	-0.562714	0.000158243	-1.16593	6.94041e-05	0.0714516	Down-Hyper
ALPL	-0.545964	0.000270051	-3.85535	4.53552e-30	0.0124208	Down-Hyper
AMBP	-0.758115	2.00969e-08	-4.14959	1.66637e-10	0.153505	Down-Hyper
AMN	-0.862982	5.09683e-12	-6.5544	5.12308e-70	0.226049	Down-Hyper
AMT	-0.652678	5.41997e-06	-1.09095	6.6077e-10	0.187953	Down-Hyper
ANKRD2	-0.659292	4.09898e-06	-3.55358	2.71835e-07	0.0998563	Down-Hyper
ANKS4B	-0.811129	4.23639e-10	-7.89079	1.70835e-71	0.196987	Down-Hyper
ANXA11	-0.722907	1.64053e-07	-1.44986	7.67e-16	0.140973	Down-Hyper
ANXA9	-0.720617	1.85784e-07	-4.20016	9.54601e-29	0.109852	Down-Hyper
APCDD1L	-0.632838	1.2288e-05	-2.89618	1.12327e-12	0.21172	Down-Hyper
APOM	-0.810492	4.39581e-10	-4.24559	2.08964e-39	0.116249	Down-Hyper
AQP2	-0.807528	5.62799e-10	-10.2335	6.92052e-142	0.0970469	Down-Hyper
ARHGAP24	-0.622661	1.83018e-05	-1.7878	1.84091e-14	0.121795	Down-Hyper
ARHGAP8	-0.454111	0.00325236	-2.32449	3.23395e-10	0.0594688	Down-Hyper
ARHGEF10L	-0.796469	1.32502e-09	-2.10119	8.45937e-22	0.0634073	Down-Hyper
ARHGEF15	-0.635612	1.10531e-05	-2.03631	4.48973e-25	0.0600778	Down-Hyper
ARHGEF16	-0.465274	0.0024836	-3.9343	6.4568e-38	0.053339	Down-Hyper
ARHGEF28	-0.684453	1.26e-06	-1.24776	3.09872e-12	0.0710561	Down-Hyper
ARMC7	-0.52658	0.000482246	-1.22322	2.7072e-10	0.037774	Down-Hyper
ARSA	-0.459065	0.00287905	-1.01665	0.000311521	0.141962	Down-Hyper
ASPA	-0.66906	2.59523e-06	-3.8586	3.55064e-18	0.152738	Down-Hyper
ASS1	-0.657839	4.35498e-06	-4.28383	4.06726e-21	0.0578442	Down-Hyper
ATP1A1	-0.690777	9.20532e-07	-2.80392	3.20448e-38	0.102147	Down-Hyper
ATP6V0A4	-0.806164	6.12821e-10	-8.81924	3.87068e-54	0.189751	Down-Hyper
ATP6V0B	-0.473797	0.00202415	-1.1697	1.30403e-11	0.0400187	Down-Hyper
AVPI1	-0.518389	0.000609938	-1.10191	0.000215136	0.0460047	Down-Hyper
B3GNT2	-0.685948	1.17055e-06	-1.11974	4.06531e-09	0.0875069	Down-Hyper
BCAR1	-0.757798	2.03538e-08	-1.18176	8.6839e-12	0.0737685	Down-Hyper
BCAS1	-0.612777	2.72134e-05	-3.16858	3.61588e-08	0.079108	Down-Hyper
BCL6B	-0.606121	3.5063e-05	-1.15242	1.27626e-09	0.120069	Down-Hyper
BHMT	-0.690376	9.39465e-07	-7.78563	6.93088e-76	0.188375	Down-Hyper
BHMT2	-0.909971	4.9609e-15	-6.4309	3.71521e-103	0.212028	Down-Hyper
BLNK	-0.465512	0.00247218	-2.47403	2.13239e-16	0.0411884	Down-Hyper
BNIPL	-0.635615	1.10531e-05	-2.06304	1.67263e-08	0.0338225	Down-Hyper
BSND	-0.651654	5.64311e-06	-8.80219	2.65713e-32	0.0568539	Down-Hyper
BSPRY	-0.454114	0.00325236	-4.02243	2.16032e-18	0.0485039	Down-Hyper
BTNL9	-0.491599	0.00127991	-1.71208	1.48719e-07	0.139451	Down-Hyper
C10orf62	-0.659136	4.12217e-06	-4.68376	1.84983e-21	0.0474566	Down-Hyper
C11orf54	-0.794203	1.58976e-09	-2.34752	1.96717e-34	0.248183	Down-Hyper
C11orf80	-0.629818	1.39449e-05	-1.2007	2.52363e-09	0.0745417	Down-Hyper
C12orf74	-0.628426	1.47119e-05	-3.04235	1.406e-06	0.214666	Down-Hyper
C14orf105	-0.822781	1.65093e-10	-5.43556	7.16978e-28	0.232456	Down-Hyper
C1orf106	-0.707626	3.89574e-07	-2.53361	2.42128e-09	0.196097	Down-Hyper
C1orf116	-0.506	0.000859323	-4.64177	8.14249e-20	0.0754235	Down-Hyper
C1orf172	-0.46918	0.00226034	-2.88313	6.38363e-15	0.0840713	Down-Hyper
C1orf210	-0.537168	0.000350249	-4.61643	3.05837e-22	0.165405	Down-Hyper
C2orf40	-0.521651	0.000554508	-3.75038	2.05429e-14	0.249551	Down-Hyper
C2orf54	-0.731892	1.00208e-07	-5.98631	2.28544e-33	0.055142	Down-Hyper
C6orf123	-0.49685	0.001109	-3.21121	1.51067e-14	0.166438	Down-Hyper
C6orf132	-0.532982	0.00039695	-1.89012	2.44366e-06	0.0798052	Down-Hyper
C8orf4	-0.464559	0.00252787	-2.04419	2.08072e-09	0.12326	Down-Hyper
C9orf64	-0.713137	2.85226e-07	-1.86893	6.9546e-09	0.377464	Down-Hyper
C9orf66	-0.796342	1.32692e-09	-5.73958	8.28017e-32	0.115843	Down-Hyper
CASKIN2	-0.68217	1.41338e-06	-1.52382	5.90955e-32	0.0717335	Down-Hyper
CBLC	-0.803269	7.87198e-10	-4.71837	1.29044e-22	0.21027	Down-Hyper
CCNI2	-0.666205	2.96932e-06	-3.93516	8.83066e-22	0.157722	Down-Hyper
CDH1	-0.782832	3.28223e-09	-3.8738	6.24839e-26	0.086689	Down-Hyper
CDH16	-0.757384	2.07362e-08	-8.66638	5.46809e-49	0.249149	Down-Hyper
CDIP1	-0.599578	4.50137e-05	-1.48123	9.02306e-22	0.0610005	Down-Hyper
CDKL1	-0.786521	2.71195e-09	-2.12663	4.22738e-24	0.121147	Down-Hyper
CDKL2	-0.700178	5.7152e-07	-3.13559	1.44814e-22	0.130477	Down-Hyper
CDS1	-0.5989	4.61556e-05	-1.48665	1.33063e-05	0.0886735	Down-Hyper
CERKL	-0.546205	0.000268453	-3.57842	2.06267e-13	0.0824635	Down-Hyper
CES3	-0.59886	4.6158e-05	-4.53073	1.92356e-38	0.0336547	Down-Hyper
CES4A	-0.655553	4.80455e-06	-2.16007	2.44786e-13	0.11651	Down-Hyper
CGN	-0.797325	1.26168e-09	-4.17136	4.18386e-28	0.193791	Down-Hyper
CGNL1	-0.713307	2.83177e-07	-2.91542	2.31014e-31	0.0925383	Down-Hyper
CHDH	-0.854903	1.05104e-11	-3.31763	5.27259e-25	0.0873463	Down-Hyper
CHRD	-0.496574	0.00111476	-1.88061	2.13565e-08	0.0269181	Down-Hyper
CKB	-0.508251	0.000808198	-2.66692	2.04355e-20	0.0689635	Down-Hyper
CKMT2	-0.557375	0.000188666	-2.50671	5.98739e-11	0.0745206	Down-Hyper
CLCNKB	-0.600307	4.3735e-05	-8.37882	5.17791e-93	0.0762018	Down-Hyper
CLDN10	-0.734151	8.79773e-08	-5.78219	1.50182e-37	0.187698	Down-Hyper
CLDN19	-0.771647	7.62909e-09	-6.06777	4.4457e-25	0.212993	Down-Hyper
CLDN8	-0.785515	2.86939e-09	-8.12573	2.09215e-44	0.165295	Down-Hyper
CLMN	-0.498501	0.0010595	-2.57637	2.52937e-45	0.105601	Down-Hyper
CLUH	-0.656653	4.57427e-06	-1.94407	2.23875e-20	0.120746	Down-Hyper
CMBL	-0.680304	1.55095e-06	-2.03074	4.44936e-14	0.032647	Down-Hyper
CNDP2	-0.801015	9.4693e-10	-1.66693	6.74812e-24	0.139335	Down-Hyper
CNKSR1	-0.698474	6.25053e-07	-2.80171	3.81419e-42	0.0379223	Down-Hyper
CNNM2	-0.681577	1.45716e-06	-1.59477	2.18684e-29	0.0514486	Down-Hyper
COBL	-0.54261	0.000297598	-3.50452	1.03492e-22	0.178036	Down-Hyper
COLCA1	-0.787378	2.55611e-09	-2.76098	1.41674e-18	0.116058	Down-Hyper
COLEC11	-0.453267	0.00331363	-1.21508	5.22525e-05	0.0100401	Down-Hyper
COX5A	-0.563004	0.000156973	-1.16177	1.1888e-11	0.0399557	Down-Hyper
COX7A1	-0.682277	1.4088e-06	-1.98483	1.6362e-08	0.249134	Down-Hyper
CPEB4	-0.857576	8.0951e-12	-2.53826	3.0684e-26	0.210719	Down-Hyper
CPT1A	-0.557547	0.000187739	-1.85163	6.67387e-30	0.0323223	Down-Hyper
CPVL	-0.501054	0.000986659	-1.20227	6.89526e-07	0.0771315	Down-Hyper
CPXM2	-0.5335	0.000391002	-1.38342	0.000560402	0.178299	Down-Hyper
CRB3	-0.595584	5.19427e-05	-5.44835	7.49146e-24	0.158285	Down-Hyper
CRHBP	-0.55821	0.000183984	-3.80414	5.38446e-52	0.0857693	Down-Hyper
CRYAB	-0.576153	0.000102652	-2.47314	1.38434e-09	0.09542	Down-Hyper
CTAGE5	-0.692615	8.41942e-07	-1.13983	3.05609e-09	0.0431346	Down-Hyper
CX3CL1	-0.531621	0.000415029	-2.73399	1.74645e-24	0.1167	Down-Hyper
CXCL14	-0.677493	1.74653e-06	-4.72122	1.24027e-27	0.0651122	Down-Hyper
CYB561	-0.509785	0.000777931	-1.47537	1.39177e-11	0.086191	Down-Hyper
CYFIP2	-0.846245	2.42616e-11	-3.60449	1.40068e-59	0.147771	Down-Hyper
CYP8B1	-0.658453	4.22988e-06	-4.72442	1.02521e-19	0.244727	Down-Hyper
CYSTM1	-0.824769	1.40578e-10	-2.76532	4.76281e-44	0.222313	Down-Hyper
DAK	-0.683092	1.35316e-06	-1.59889	1.16231e-20	0.0629435	Down-Hyper
DDC	-0.628054	1.48738e-05	-7.55553	7.32313e-39	0.0723938	Down-Hyper
DEFB1	-0.732273	9.84656e-08	-8.34591	2.15055e-86	0.172282	Down-Hyper
DEPDC7	-0.517757	0.000620366	-2.14062	3.12208e-19	0.0214725	Down-Hyper
DHCR24	-0.675099	1.95055e-06	-2.17359	1.17283e-12	0.0381342	Down-Hyper
DHRS11	-0.517576	0.000623286	-1.52988	1.11868e-09	0.0262522	Down-Hyper
DIO1	-0.756662	2.15908e-08	-8.33943	3.8341e-39	0.0933304	Down-Hyper
DMGDH	-0.797813	1.21773e-09	-3.82843	1.07774e-110	0.266602	Down-Hyper
DMRT2	-0.475509	0.00194216	-6.19858	9.12311e-19	0.149922	Down-Hyper
DMTN	-0.831478	7.45409e-11	-2.57847	3.20385e-24	0.189975	Down-Hyper
DNASE1	-0.706239	4.21694e-07	-1.47036	1.96822e-15	0.114629	Down-Hyper
DOK4	-0.792041	1.83095e-09	-1.32427	1.7767e-11	0.102809	Down-Hyper
DPYS	-0.66715	2.83129e-06	-6.48575	3.14804e-49	0.153383	Down-Hyper
DSCAML1	-0.597905	4.76426e-05	-3.19857	6.55955e-29	0.139836	Down-Hyper
DUSP15	-0.576625	0.00010094	-2.8536	7.11909e-36	0.0198423	Down-Hyper
ECSCR	-0.544412	0.000282635	-1.0327	0.000791101	0.0467004	Down-Hyper
EGF	-0.781712	3.56762e-09	-8.19523	6.25367e-128	0.0825811	Down-Hyper
EGOT	-0.76123	1.61246e-08	-3.95706	1.07655e-24	0.104631	Down-Hyper
EHF	-0.854564	1.05104e-11	-3.79558	1.55995e-18	0.10665	Down-Hyper
EHHADH	-0.84007	3.83818e-11	-2.62258	2.27383e-47	0.110732	Down-Hyper
ELMO3	-0.80771	5.59988e-10	-3.41472	5.53268e-43	0.271564	Down-Hyper
ELOVL7	-0.632848	1.2288e-05	-3.83936	9.96632e-30	0.0486589	Down-Hyper
ENO1	-0.581244	8.63062e-05	-1.14506	5.5931e-12	0.113856	Down-Hyper
ENPP6	-0.625078	1.66406e-05	-5.10057	3.2263e-19	0.0183692	Down-Hyper
ENTPD2	-0.600587	4.32947e-05	-2.1557	6.31618e-06	0.0664855	Down-Hyper
ENTPD5	-0.82008	1.98682e-10	-1.83246	3.19752e-28	0.179935	Down-Hyper
EPAS1	-0.512072	0.000726335	-1.88717	8.22036e-18	0.145591	Down-Hyper
EPB41L1	-0.692249	8.52401e-07	-1.85756	1.15825e-24	0.0669569	Down-Hyper
EPHX2	-0.710366	3.33958e-07	-2.4169	1.75262e-30	0.0742056	Down-Hyper
EPHX3	-0.506899	0.000840551	-2.12742	6.82286e-10	0.384066	Down-Hyper
EPS8L2	-0.715815	2.45554e-07	-5.09482	2.72213e-44	0.131828	Down-Hyper
ERBB2	-0.729776	1.12932e-07	-1.43804	8.31689e-15	0.0944596	Down-Hyper
ERP27	-0.545628	0.000272903	-2.66308	2.06092e-17	0.0480935	Down-Hyper
ERRFI1	-0.64664	7.00617e-06	-2.2483	1.84355e-11	0.0753923	Down-Hyper
ERVMER34-1	-0.695778	7.22733e-07	-2.23758	7.20881e-12	0.108311	Down-Hyper
ESRP2	-0.590789	6.16184e-05	-4.04181	1.57497e-34	0.144742	Down-Hyper
ESRRA	-0.581313	8.62031e-05	-2.35015	3.30475e-32	0.018451	Down-Hyper
ETNK2	-0.637876	1.00459e-05	-2.47135	4.80461e-25	0.0562437	Down-Hyper
EXOC3L2	-0.521269	0.000559513	-2.75394	3.5474e-32	0.189849	Down-Hyper
EZR	-0.606983	3.38505e-05	-1.71995	2.86231e-11	0.131559	Down-Hyper
F11	-0.791447	1.89751e-09	-7.19492	7.35104e-54	0.0987582	Down-Hyper
FABP1	-0.739391	6.48583e-08	-6.71173	1.05956e-34	0.143576	Down-Hyper
FAM149A	-0.784216	3.12384e-09	-2.22441	1.2347e-15	0.162022	Down-Hyper
FAM195A	-0.544394	0.000282635	-2.68735	7.35739e-30	0.0190031	Down-Hyper
FAM83B	-0.463145	0.00260745	-4.48975	8.17807e-16	0.0381841	Down-Hyper
FAM83F	-0.661899	3.63274e-06	-5.21561	1.01668e-41	0.177176	Down-Hyper
FAM83H	-0.55109	0.000230493	-1.99634	8.83055e-10	0.0340629	Down-Hyper
FAM84B	-0.462714	0.00263081	-1.74022	1.49044e-07	0.171399	Down-Hyper
FBP1	-0.745668	4.36741e-08	-4.73892	4.709e-41	0.0399931	Down-Hyper
FBXO17	-0.542435	0.000298303	-1.00959	2.77974e-08	0.125059	Down-Hyper
FCAMR	-0.542241	0.00029995	-7.10212	1.54814e-36	0.027851	Down-Hyper
FCN3	-0.482714	0.00162273	-3.65746	2.43339e-13	0.0184791	Down-Hyper
FER1L5	-0.570901	0.000121442	-1.0646	0.00237733	0.21463	Down-Hyper
FGD3	-0.570873	0.000121442	-1.14073	6.46763e-06	0.0791418	Down-Hyper
FGD5	-0.677713	1.7392e-06	-1.62763	5.0324e-13	0.0533161	Down-Hyper
FGFR4	-0.783147	3.24137e-09	-2.68657	4.2308e-16	0.0814402	Down-Hyper
FMO1	-0.672398	2.21327e-06	-4.08711	1.28135e-12	0.0957124	Down-Hyper
FMO2	-0.516044	0.000651699	-2.5779	6.63357e-09	0.0595684	Down-Hyper
FN3K	-0.573198	0.000112879	-3.19361	2.55413e-60	0.0653414	Down-Hyper
FOLR1	-0.742373	5.33644e-08	-4.15895	9.96632e-30	0.145724	Down-Hyper
FRK	-0.821607	1.80819e-10	-2.56185	1.6487e-15	0.285694	Down-Hyper
FRMD1	-0.547067	0.000263078	-5.74921	1.8711e-26	0.0551746	Down-Hyper
FUT6	-0.798431	1.16067e-09	-8.08587	8.70629e-71	0.081909	Down-Hyper
FXYD2	-0.485439	0.00151022	-4.24688	1.71689e-54	0.0662533	Down-Hyper
G6PC	-0.816814	2.68365e-10	-9.57396	6.78114e-71	0.184302	Down-Hyper
GAL3ST1	-0.704456	4.55069e-07	-4.36134	6.90627e-30	0.0801273	Down-Hyper
GALE	-0.719251	1.98664e-07	-1.65908	2.16419e-23	0.110654	Down-Hyper
GALK1	-0.467813	0.00233838	-1.45589	1.36599e-14	0.0897795	Down-Hyper
GALNT11	-0.652569	5.43761e-06	-1.28199	1.32358e-14	0.0850332	Down-Hyper
GALNT14	-0.633091	1.22521e-05	-4.2867	4.39461e-38	0.0647823	Down-Hyper
GAS8	-0.642314	8.36802e-06	-1.36012	5.62062e-10	0.0841251	Down-Hyper
GCNT2	-0.73531	8.18636e-08	-2.30645	1.13014e-21	0.0739811	Down-Hyper
GDF15	-0.769327	9.12031e-09	-3.45528	3.72163e-22	0.0714813	Down-Hyper
GGT6	-0.704622	4.52781e-07	-6.47928	3.33813e-46	0.160274	Down-Hyper
GIPC2	-0.818948	2.20758e-10	-4.40741	4.01622e-66	0.16913	Down-Hyper
GJA4	-0.680112	1.55989e-06	-1.01904	1.89618e-06	0.0649031	Down-Hyper
GJB2	-0.482643	0.00162442	-2.04923	0.000339853	0.0828374	Down-Hyper
GLIS3	-0.809091	4.9597e-10	-1.62659	1.05547e-17	0.10437	Down-Hyper
GLTPD2	-0.872626	1.46723e-12	-5.89393	4.50651e-29	0.145215	Down-Hyper
GLYATL1	-0.626668	1.56752e-05	-6.63917	1.15393e-73	0.0855373	Down-Hyper
GLYCTK	-0.566064	0.00014161	-1.59419	1.50144e-14	0.1023	Down-Hyper
GMPR	-0.567429	0.000135287	-1.49221	5.4454e-08	0.0637192	Down-Hyper
GPD1	-0.813108	3.60685e-10	-5.44153	1.3009e-36	0.0708886	Down-Hyper
GPER1	-0.818733	2.2212e-10	-2.16344	1.9865e-12	0.164634	Down-Hyper
GPR157	-0.58584	7.37014e-05	-1.74842	1.74215e-17	0.104391	Down-Hyper
GPR160	-0.564991	0.000146796	-2.82201	9.09508e-31	0.0361954	Down-Hyper
GPR39	-0.454147	0.00325236	-1.3758	0.0002219	0.0522814	Down-Hyper
GPR56	-0.474917	0.00196715	-2.78472	4.49551e-17	0.0527477	Down-Hyper
GPRC5B	-0.55415	0.000208983	-1.67467	1.02741e-09	0.00651646	Down-Hyper
GPT	-0.875416	1.46723e-12	-4.59734	1.5212e-28	0.167707	Down-Hyper
GPX3	-0.836232	4.68317e-11	-5.12739	4.16e-34	0.0609303	Down-Hyper
GRAMD1C	-0.747653	3.89071e-08	-3.08095	1.32305e-29	0.0935888	Down-Hyper
GRAMD2	-0.530947	0.000422792	-2.81295	4.5406e-17	0.0892202	Down-Hyper
GRB14	-0.523816	0.000519659	-4.20289	4.49727e-22	0.0952403	Down-Hyper
GRB7	-0.652831	5.39035e-06	-2.62887	1.60019e-14	0.0772452	Down-Hyper
GRHL2	-0.665832	3.00635e-06	-3.90585	1.4703e-16	0.188681	Down-Hyper
GRPEL1	-0.546503	0.000266997	-1.08179	1.48972e-11	0.0897017	Down-Hyper
GYLTL1B	-0.52165	0.000554508	-3.84209	3.73671e-25	0.0845017	Down-Hyper
H19	-0.464559	0.00252787	-3.07703	4.47157e-07	0.133054	Down-Hyper
HAO2	-0.825285	1.38447e-10	-6.8006	6.33194e-98	0.12106	Down-Hyper
HGD	-0.757332	2.07362e-08	-5.42481	8.94581e-85	0.194776	Down-Hyper
HIBADH	-0.645497	7.37913e-06	-1.16968	2.75114e-16	0.166279	Down-Hyper
HMGCS2	-0.475749	0.00193287	-8.81462	8.96486e-40	0.119948	Down-Hyper
HNF1A	-0.820431	1.94644e-10	-6.04185	2.26333e-42	0.19864	Down-Hyper
HNF1B	-0.783291	3.22542e-09	-5.91951	5.35252e-23	0.503013	Down-Hyper
HNF4A	-0.849629	1.72213e-11	-8.31007	1.9731e-47	0.196901	Down-Hyper
HNMT	-0.708432	3.7199e-07	-1.2146	1.97035e-07	0.248034	Down-Hyper
HOGA1	-0.677366	1.75402e-06	-4.79445	5.71287e-50	0.0430698	Down-Hyper
HOXB6	-0.703956	4.64603e-07	-1.52703	0.000361579	0.247157	Down-Hyper
HOXD1	-0.560422	0.000171269	-1.64271	0.00225897	0.0692189	Down-Hyper
HPCAL1	-0.774572	6.13592e-09	-1.3177	5.97911e-22	0.0706318	Down-Hyper
HPN	-0.612662	2.73034e-05	-5.90803	1.79122e-49	0.108947	Down-Hyper
HPS1	-0.464306	0.00254299	-1.02494	0.00128309	0.132549	Down-Hyper
HRG	-0.806648	6.06842e-10	-7.8972	1.1287e-38	0.235359	Down-Hyper
HSPA2	-0.758498	1.96225e-08	-3.82675	1.98887e-25	0.171305	Down-Hyper
HYAL1	-0.836252	4.68317e-11	-3.64383	9.98645e-19	0.397606	Down-Hyper
IDH2	-0.66614	2.97238e-06	-1.97457	2.16976e-24	0.131793	Down-Hyper
IL17RE	-0.797087	1.26287e-09	-2.32303	2.65186e-15	0.168061	Down-Hyper
IL1RL2	-0.516248	0.000648183	-3.02153	6.60289e-19	0.134366	Down-Hyper
IMPA2	-0.664229	3.25525e-06	-2.75643	2.05858e-24	0.11477	Down-Hyper
INADL	-0.579578	9.11806e-05	-2.0517	4.81145e-27	0.110976	Down-Hyper
INPP5J	-0.690805	9.20532e-07	-4.38607	7.67186e-93	0.109428	Down-Hyper
IRF6	-0.742803	5.19845e-08	-3.86665	1.90046e-21	0.179652	Down-Hyper
IVNS1ABP	-0.613439	2.65751e-05	-1.43357	3.4597e-21	0.0944672	Down-Hyper
IYD	-0.492566	0.0012463	-6.45969	1.14405e-63	0.105859	Down-Hyper
JUP	-0.782872	3.28223e-09	-1.35396	2.07176e-09	0.178436	Down-Hyper
KANK1	-0.472809	0.00207416	-1.12509	7.04726e-09	0.016915	Down-Hyper
KAZN	-0.675494	1.91878e-06	-1.15211	2.46639e-09	0.136508	Down-Hyper
KCNJ1	-0.657322	4.44077e-06	-7.77499	4.01622e-66	0.138797	Down-Hyper
KCNJ10	-0.463096	0.00260855	-6.20137	8.35723e-29	0.0366214	Down-Hyper
KCNJ13	-0.673605	2.10512e-06	-4.37708	2.97838e-14	0.0910779	Down-Hyper
KCNJ15	-0.721895	1.73404e-07	-4.29035	1.34179e-28	0.0798024	Down-Hyper
KCNJ16	-0.63065	1.34681e-05	-5.49938	1.88504e-24	0.066336	Down-Hyper
KCNJ3	-0.630795	1.34029e-05	-5.14415	3.12107e-41	0.0678892	Down-Hyper
KCNQ1	-0.724032	1.54619e-07	-2.49461	2.05273e-41	0.0948968	Down-Hyper
KCP	-0.693435	8.04801e-07	-1.40207	2.05024e-05	0.0916741	Down-Hyper
KIAA1244	-0.55318	0.000215833	-2.1151	3.20579e-08	0.0782779	Down-Hyper
KIF17	-0.536955	0.000352372	-1.44102	1.68647e-06	0.0186134	Down-Hyper
KIFC3	-0.7367	7.56081e-08	-2.96788	4.25715e-44	0.161937	Down-Hyper
KITLG	-0.565368	0.000144945	-1.33397	1.05748e-05	0.0531907	Down-Hyper
KL	-0.459978	0.00281447	-5.54964	5.03581e-64	0.126663	Down-Hyper
KLHDC7A	-0.668644	2.63439e-06	-4.78969	6.5971e-36	0.146979	Down-Hyper
KLKB1	-0.571654	0.000118885	-3.06365	2.309e-31	0.177207	Down-Hyper
KNG1	-0.789431	2.19928e-09	-10.3473	6.52372e-105	0.134146	Down-Hyper
KRT19	-0.462663	0.00263198	-1.84856	5.95167e-06	0.0532778	Down-Hyper
KRT7	-0.647468	6.75362e-06	-4.50967	4.87283e-17	0.218919	Down-Hyper
KRT8	-0.571542	0.00011919	-1.6291	7.867e-05	0.0640131	Down-Hyper
LAD1	-0.669588	2.54892e-06	-2.93166	1.15847e-20	0.157177	Down-Hyper
LGR4	-0.653887	5.14553e-06	-1.61316	3.97129e-17	0.0461829	Down-Hyper
LINC00885	-0.679715	1.57754e-06	-4.16233	1.72103e-18	0.258099	Down-Hyper
LLGL2	-0.83912	3.91189e-11	-3.50235	1.29473e-27	0.136528	Down-Hyper
LMO7	-0.697892	6.41247e-07	-1.74392	6.18552e-10	0.0969442	Down-Hyper
LMX1B	-0.480443	0.00172005	-1.63473	0.0154769	0.0168478	Down-Hyper
LNX1	-0.54912	0.000245625	-4.84952	2.17985e-35	0.0662378	Down-Hyper
LPIN3	-0.793227	1.68065e-09	-2.81493	3.81876e-19	0.148222	Down-Hyper
LY75	-0.57108	0.000120829	-1.04909	0.000486826	0.324831	Down-Hyper
LYNX1	-0.460961	0.00274593	-1.44196	3.07439e-08	0.0259248	Down-Hyper
LZTS3	-0.598623	4.64652e-05	-2.39912	3.00755e-23	0.180044	Down-Hyper
MAL	-0.777093	5.13033e-09	-5.87986	4.96795e-24	0.110331	Down-Hyper
MAP2K3	-0.496723	0.0011121	-1.76054	9.33734e-16	0.0500742	Down-Hyper
MARC1	-0.728836	1.19906e-07	-1.43675	1.87011e-09	0.0660373	Down-Hyper
MCOLN3	-0.462562	0.00263677	-1.7943	4.11216e-12	0.0963665	Down-Hyper
ME3	-0.571156	0.000120652	-1.24454	1.1555e-08	0.0768059	Down-Hyper
MET	-0.625976	1.60904e-05	-1.51561	1.72653e-06	0.0993571	Down-Hyper
MFSD4	-0.655993	4.71986e-06	-5.71335	2.60021e-98	0.069853	Down-Hyper
MFSD7	-0.639652	9.35895e-06	-1.56215	4.93e-08	0.218906	Down-Hyper
MGLL	-0.784848	2.99482e-09	-1.38975	1.7496e-08	0.138817	Down-Hyper
MIA2	-0.826234	1.27157e-10	-5.12326	1.45485e-17	0.264786	Down-Hyper
MIDN	-0.561895	0.000162668	-1.08634	3.55751e-14	0.0505492	Down-Hyper
MIOX	-0.721624	1.75859e-07	-10.0248	4.93413e-105	0.137674	Down-Hyper
MIR30A	-0.598662	4.64645e-05	-2.09809	2.25779e-08	0.256621	Down-Hyper
MOGAT1	-0.650966	5.8278e-06	-4.54275	9.38468e-24	0.103229	Down-Hyper
MOGAT3	-0.504686	0.000891141	-5.22436	7.72844e-18	0.15144	Down-Hyper
MPP5	-0.529908	0.000435381	-1.13619	9.06414e-11	0.072929	Down-Hyper
MPPED2	-0.56117	0.000166846	-2.29271	1.28904e-08	0.162162	Down-Hyper
MPST	-0.849848	1.72213e-11	-1.18761	2.73462e-13	0.0927741	Down-Hyper
MT1E	-0.609475	3.09809e-05	-3.56171	3.05785e-29	0.0567365	Down-Hyper
MT1X	-0.533518	0.000391002	-2.94298	1.08075e-16	0.081492	Down-Hyper
MTSS1	-0.602503	4.02734e-05	-1.03794	4.71886e-09	0.180882	Down-Hyper
MYL9	-0.470387	0.00219645	-1.15745	0.000881833	0.158394	Down-Hyper
MYO1C	-0.5083	0.000808198	-1.21178	1.34748e-13	0.0947841	Down-Hyper
MYO6	-0.550856	0.000232123	-1.57852	4.71175e-15	0.0451829	Down-Hyper
MYO9A	-0.486907	0.0014529	-1.06994	2.74109e-13	0.0278626	Down-Hyper
NAPRT1	-0.637966	1.0023e-05	-1.67897	5.43466e-16	0.108737	Down-Hyper
NAPSA	-0.738067	7.05887e-08	-3.87736	1.68224e-31	0.204069	Down-Hyper
NCOA7	-0.635067	1.12966e-05	-1.10938	6.59161e-08	0.080013	Down-Hyper
NDRG1	-0.857736	8.0951e-12	-2.40843	3.19583e-29	0.196524	Down-Hyper
NDRG2	-0.720074	1.90959e-07	-1.22804	5.75845e-09	0.0724852	Down-Hyper
NEBL	-0.651998	5.5811e-06	-2.17689	6.02348e-15	0.107164	Down-Hyper
NEDD4L	-0.779974	4.06088e-09	-1.87335	2.96521e-14	0.133223	Down-Hyper
NEIL1	-0.453758	0.0032769	-1.50361	2.93732e-10	0.092716	Down-Hyper
NEK5	-0.516727	0.000639765	-1.1457	0.0016972	0.138734	Down-Hyper
NEURL3	-0.594027	5.47648e-05	-3.45293	1.98128e-11	0.103363	Down-Hyper
NFKBIB	-0.569819	0.000125171	-1.16458	6.18742e-09	0.0687016	Down-Hyper
NGEF	-0.471023	0.00216418	-2.94881	2.67156e-16	0.0248996	Down-Hyper
NHEJ1	-0.580745	8.78828e-05	-1.99388	1.24628e-12	0.0137983	Down-Hyper
NINL	-0.628302	1.4732e-05	-1.09296	1.315e-10	0.122855	Down-Hyper
NIPAL1	-0.703607	4.73086e-07	-2.41682	1.47622e-13	0.132517	Down-Hyper
NKAPL	-0.677492	1.74653e-06	-2.35848	1.85845e-08	0.281942	Down-Hyper
NLRP6	-0.620542	1.99539e-05	-2.53821	1.65825e-07	0.124317	Down-Hyper
NLRX1	-0.799618	1.0512e-09	-1.07434	5.16533e-09	0.111445	Down-Hyper
NMRAL1	-0.54077	0.000313681	-1.32407	1.8607e-05	0.249631	Down-Hyper
NOS3	-0.628413	1.47119e-05	-1.95569	1.19667e-20	0.0708531	Down-Hyper
NOSTRIN	-0.647429	6.75362e-06	-2.71488	1.78547e-40	0.0731491	Down-Hyper
NPC1L1	-0.456131	0.00309395	-2.35224	5.55869e-05	0.167776	Down-Hyper
NPR3	-0.495125	0.00116068	-2.81387	4.44658e-15	0.0755971	Down-Hyper
NQO1	-0.466131	0.00243749	-1.30504	2.83941e-09	0.0413767	Down-Hyper
NQO2	-0.57812	9.58088e-05	-2.13241	2.75988e-28	0.0434438	Down-Hyper
NR0B2	-0.677111	1.77417e-06	-6.89789	8.43562e-37	0.156524	Down-Hyper
NR3C2	-0.756308	2.2062e-08	-2.3542	5.37084e-19	0.151019	Down-Hyper
NUDT16	-0.617716	2.2404e-05	-1.07948	3.69114e-13	0.0448068	Down-Hyper
NUDT16P	-0.838831	3.91189e-11	-2.82163	4.74298e-23	0.295972	Down-Hyper
OCLN	-0.61651	2.35022e-05	-2.36106	2.05946e-12	0.0817953	Down-Hyper
OGDH	-0.682829	1.36957e-06	-1.21338	8.94812e-29	0.0603815	Down-Hyper
OPTN	-0.590665	6.18338e-05	-1.20636	1.71526e-07	0.0118169	Down-Hyper
OSBPL3	-0.667457	2.79241e-06	-1.14479	3.12242e-06	0.0580863	Down-Hyper
OVOL1	-0.584391	7.77191e-05	-4.53543	6.71362e-20	0.132246	Down-Hyper
PACRG	-0.479657	0.00175388	-1.08231	2.10935e-05	0.154893	Down-Hyper
PAH	-0.603305	3.91265e-05	-9.61272	6.19165e-68	0.0734604	Down-Hyper
PAK4	-0.632363	1.25305e-05	-1.1155	5.38072e-13	0.11798	Down-Hyper
PAK6	-0.477064	0.00187515	-2.72076	2.0324e-13	0.031134	Down-Hyper
PALM	-0.568925	0.000129112	-1.67625	7.47398e-15	0.101711	Down-Hyper
PANK1	-0.541765	0.000303987	-1.70564	2.44536e-18	0.0910927	Down-Hyper
PAQR5	-0.840888	3.64569e-11	-6.10809	5.17032e-55	0.195034	Down-Hyper
PAQR7	-0.872653	1.46723e-12	-1.99605	2.46199e-37	0.220003	Down-Hyper
PARD6B	-0.635133	1.12838e-05	-3.02985	6.154e-20	0.149697	Down-Hyper
PAX8	-0.688274	1.03332e-06	-2.11363	4.22521e-05	0.196157	Down-Hyper
PBLD	-0.766033	1.16986e-08	-3.36657	1.89169e-99	0.135408	Down-Hyper
PDXK	-0.735968	7.8878e-08	-1.754	7.57742e-31	0.0911633	Down-Hyper
PDZD3	-0.546264	0.000268408	-7.1143	2.18286e-48	0.0900448	Down-Hyper
PDZK1	-0.787032	2.6139e-09	-6.1145	7.70824e-77	0.143838	Down-Hyper
PER1	-0.512253	0.000724576	-2.00991	1.85138e-17	0.0770245	Down-Hyper
PER3	-0.757971	2.02017e-08	-1.41886	1.64683e-09	0.106676	Down-Hyper
PFKFB2	-0.737466	7.26275e-08	-1.47355	3.96767e-13	0.0498512	Down-Hyper
PHF17	-0.641062	8.83508e-06	-1.00925	1.86284e-12	0.0651593	Down-Hyper
PITPNM1	-0.589603	6.4249e-05	-1.50802	1.27033e-13	0.0344953	Down-Hyper
PKHD1	-0.675121	1.95055e-06	-5.66925	1.6118e-25	0.0876981	Down-Hyper
PKLR	-0.720826	1.83946e-07	-7.21662	1.20002e-45	0.0603662	Down-Hyper
PKP3	-0.458722	0.00290301	-2.26713	9.31409e-06	0.0621846	Down-Hyper
PKP4	-0.608827	3.16963e-05	-1.46036	1.59007e-09	0.0773715	Down-Hyper
PLA2G12B	-0.77128	7.81277e-09	-5.17877	3.71614e-23	0.103363	Down-Hyper
PLA2G16	-0.468922	0.00227437	-1.22587	2.35689e-06	0.0479398	Down-Hyper
PLCG2	-0.737137	7.39935e-08	-2.55248	1.37867e-33	0.0537695	Down-Hyper
PLCXD2	-0.545203	0.000276076	-1.63981	1.07942e-09	0.0873142	Down-Hyper
PLEK2	-0.74009	6.22916e-08	-2.665	5.48078e-11	0.147228	Down-Hyper
PLEKHG3	-0.67993	1.5672e-06	-1.31985	2.10641e-16	0.0718633	Down-Hyper
PLS1	-0.603946	3.82676e-05	-2.4463	1.10528e-11	0.048166	Down-Hyper
PLXNB1	-0.550348	0.000236062	-1.12729	0.00036358	0.104375	Down-Hyper
PON3	-0.516368	0.000646417	-1.41163	0.000134048	0.219428	Down-Hyper
PPARA	-0.801581	9.17672e-10	-2.31809	3.64021e-43	0.0695972	Down-Hyper
PPARGC1A	-0.512121	0.000726005	-3.64743	1.67538e-21	0.0911558	Down-Hyper
PPP1R16B	-0.704592	4.52781e-07	-2.85247	7.80161e-19	0.037694	Down-Hyper
PPP2R3A	-0.751779	2.9983e-08	-1.62316	2.15702e-49	0.0646323	Down-Hyper
PRKCDBP	-0.575947	0.000103176	-1.00181	0.00159618	0.228977	Down-Hyper
PROC	-0.838625	3.91189e-11	-4.43779	6.50854e-25	0.117755	Down-Hyper
PROM2	-0.821266	1.84241e-10	-4.27445	1.00863e-38	0.132358	Down-Hyper
PRR13	-0.58915	6.53349e-05	-1.1321	2.95822e-11	0.103236	Down-Hyper
PRR15L	-0.706845	4.07561e-07	-4.18191	1.49064e-16	0.161583	Down-Hyper
PRSS8	-0.644264	7.73882e-06	-4.69952	1.07655e-24	0.194322	Down-Hyper
PTER	-0.617016	2.30236e-05	-2.86684	9.45049e-30	0.11975	Down-Hyper
PTGR1	-0.756917	2.12906e-08	-1.78886	1.87497e-26	0.0629549	Down-Hyper
PTH1R	-0.940215	2.02905e-18	-4.79484	1.57489e-37	0.228253	Down-Hyper
PTP4A1	-0.640316	9.10211e-06	-1.18603	1.33424e-11	0.121308	Down-Hyper
PTPN3	-0.704042	4.63702e-07	-1.73043	3.49286e-11	0.0821821	Down-Hyper
PVRL4	-0.58205	8.42886e-05	-3.56505	2.54638e-10	0.0735465	Down-Hyper
PXMP4	-0.694044	7.83589e-07	-1.16407	0.00453417	0.223686	Down-Hyper
QDPR	-0.579495	9.1343e-05	-1.22981	8.39733e-14	0.0285176	Down-Hyper
RAB17	-0.631201	1.32027e-05	-4.70273	1.40173e-36	0.15377	Down-Hyper
RAB25	-0.847131	2.27107e-11	-4.27742	2.11315e-21	0.297435	Down-Hyper
RAB3IP	-0.567062	0.000136974	-2.26981	3.07753e-19	0.0732252	Down-Hyper
RALGPS1	-0.737945	7.08693e-08	-1.4416	1.35146e-13	0.0759156	Down-Hyper
RANBP3L	-0.63893	9.61037e-06	-3.66839	1.06141e-19	0.112943	Down-Hyper
RASGRP1	-0.484106	0.00156663	-1.18964	5.74925e-06	0.0763322	Down-Hyper
RASSF6	-0.672509	2.20572e-06	-1.92489	1.63861e-06	0.170545	Down-Hyper
RBM47	-0.833888	5.89091e-11	-2.40652	1.67169e-15	0.117149	Down-Hyper
RBP4	-0.609805	3.06459e-05	-4.96936	2.3234e-32	0.194305	Down-Hyper
RCAN1	-0.692358	8.52089e-07	-2.43632	1.73458e-20	0.11761	Down-Hyper
RGL3	-0.632914	1.2288e-05	-2.91081	5.37472e-16	0.0904841	Down-Hyper
RHBG	-0.623555	1.76724e-05	-6.53774	5.31854e-44	0.0910132	Down-Hyper
RHCG	-0.492861	0.00123668	-9.10813	2.94756e-85	0.0309045	Down-Hyper
RILP	-0.827241	1.1601e-10	-2.83861	7.71162e-33	0.206451	Down-Hyper
RNF152	-0.731974	1.00078e-07	-2.675	3.48117e-49	0.0381413	Down-Hyper
RNF186	-0.746853	4.06418e-08	-6.97874	9.1001e-37	0.184203	Down-Hyper
RNF212	-0.659528	4.05887e-06	-1.80431	3.7989e-07	0.139339	Down-Hyper
RNF43	-0.636406	1.06877e-05	-1.39096	3.15797e-05	0.122448	Down-Hyper
ROBO4	-0.463338	0.0025963	-1.60603	1.31423e-15	0.0480792	Down-Hyper
RPH3AL	-0.512143	0.000726005	-1.05604	6.43069e-07	0.082047	Down-Hyper
S100A10	-0.546263	0.000268408	-1.29733	3.71451e-06	0.114131	Down-Hyper
S100A14	-0.534492	0.000380375	-2.27492	2.66468e-07	0.0846992	Down-Hyper
SARDH	-0.732328	9.84656e-08	-1.44254	3.15668e-07	0.0911226	Down-Hyper
SCNN1A	-0.704262	4.58976e-07	-5.80907	7.23066e-30	0.160506	Down-Hyper
SDHB	-0.687792	1.05929e-06	-1.23933	1.20333e-13	0.128969	Down-Hyper
SELM	-0.603447	3.89566e-05	-1.41714	0.000183305	0.14184	Down-Hyper
SEMA3B	-0.503508	0.000921092	-1.89929	3.54845e-15	0.0763877	Down-Hyper
SEMA4A	-0.475758	0.00193287	-1.5351	5.39486e-07	0.0176804	Down-Hyper
SEMA4G	-0.813509	3.54475e-10	-1.68325	3.43184e-12	0.0789938	Down-Hyper
SERPINA1	-0.582213	8.39487e-05	-3.15591	2.70262e-17	0.0315471	Down-Hyper
SERPINA5	-0.70864	3.69547e-07	-6.97033	1.19291e-71	0.104438	Down-Hyper
SESN2	-0.463809	0.00256738	-1.13538	1.73526e-06	0.0745214	Down-Hyper
SETD3	-0.733382	9.24005e-08	-1.04322	7.91773e-12	0.139117	Down-Hyper
SGK2	-0.78378	3.13732e-09	-3.90343	5.44942e-47	0.137531	Down-Hyper
SGMS2	-0.52505	0.000503065	-1.88895	1.3947e-12	0.061195	Down-Hyper
SH2D3A	-0.701128	5.43101e-07	-3.92218	4.6072e-23	0.106568	Down-Hyper
SH3TC1	-0.688955	1.00349e-06	-1.66894	1.01182e-14	0.121299	Down-Hyper
SIGIRR	-0.521017	0.000562203	-2.15459	3.49187e-20	0.0402356	Down-Hyper
SIM1	-0.841048	3.64569e-11	-3.5347	1.5356e-08	0.0647848	Down-Hyper
SLC12A1	-0.756153	2.22007e-08	-9.46457	4.14183e-136	0.0572235	Down-Hyper
SLC13A3	-0.637154	1.03763e-05	-4.69666	3.34442e-38	0.0473353	Down-Hyper
SLC15A2	-0.602655	4.00825e-05	-1.99778	8.207e-13	0.139072	Down-Hyper
SLC16A4	-0.48745	0.00143148	-3.32055	1.17751e-27	0.134107	Down-Hyper
SLC16A5	-0.902731	1.62027e-14	-2.91753	5.00658e-28	0.151526	Down-Hyper
SLC16A9	-0.761397	1.60119e-08	-3.12065	4.75357e-30	0.0864576	Down-Hyper
SLC22A11	-0.870324	1.87095e-12	-7.74564	5.35557e-74	0.16143	Down-Hyper
SLC22A12	-0.84369	3.07312e-11	-9.1911	3.74228e-50	0.182502	Down-Hyper
SLC22A13	-0.857407	8.0951e-12	-5.16768	7.05264e-37	0.119149	Down-Hyper
SLC22A18AS	-0.622839	1.82211e-05	-2.23201	4.06362e-10	0.0548972	Down-Hyper
SLC22A2	-0.810619	4.39581e-10	-7.64358	1.53925e-89	0.222882	Down-Hyper
SLC22A6	-0.676949	1.78539e-06	-9.79714	2.40548e-51	0.0659748	Down-Hyper
SLC22A7	-0.688576	1.02139e-06	-8.63363	7.54184e-64	0.0675531	Down-Hyper
SLC22A8	-0.680264	1.55095e-06	-9.13889	4.09077e-123	0.111372	Down-Hyper
SLC23A1	-0.673133	2.13778e-06	-6.4265	3.03068e-51	0.104588	Down-Hyper
SLC23A3	-0.509256	0.000787475	-3.55746	6.08024e-30	0.068337	Down-Hyper
SLC25A34	-0.661504	3.69935e-06	-1.33866	1.39946e-07	0.111946	Down-Hyper
SLC25A4	-0.626149	1.60225e-05	-1.73819	3.99851e-13	0.0643318	Down-Hyper
SLC28A1	-0.792473	1.77642e-09	-6.06268	1.66826e-41	0.0933948	Down-Hyper
SLC2A2	-0.748115	3.77924e-08	-6.86892	1.05134e-38	0.169476	Down-Hyper
SLC34A1	-0.852907	1.24026e-11	-10.7685	1.56353e-69	0.130155	Down-Hyper
SLC34A3	-0.658682	4.19702e-06	-6.35836	1.06743e-28	0.0992146	Down-Hyper
SLC37A4	-0.820646	1.93588e-10	-1.77214	2.54564e-13	0.0692226	Down-Hyper
SLC39A4	-0.728471	1.21891e-07	-2.29845	1.16127e-18	0.116832	Down-Hyper
SLC39A5	-0.787952	2.47053e-09	-6.72254	6.65815e-53	0.126431	Down-Hyper
SLC3A1	-0.883025	5.23599e-13	-6.27016	2.04476e-46	0.346985	Down-Hyper
SLC44A3	-0.780131	4.03517e-09	-2.30733	1.55231e-15	0.154362	Down-Hyper
SLC45A1	-0.504418	0.000897568	-1.69774	3.04489e-09	0.0438743	Down-Hyper
SLC47A2	-0.601211	4.23843e-05	-6.5832	3.56125e-58	0.038246	Down-Hyper
SLC48A1	-0.57716	9.90154e-05	-1.2479	5.75872e-12	0.060722	Down-Hyper
SLC4A4	-0.475246	0.00195383	-3.71609	7.96201e-46	0.0437431	Down-Hyper
SLC51B	-0.744915	4.56895e-08	-4.27294	4.75875e-13	0.131085	Down-Hyper
SLC5A10	-0.778458	4.59629e-09	-6.78155	7.06715e-49	0.169382	Down-Hyper
SLC5A2	-0.82439	1.43676e-10	-5.44866	3.34484e-42	0.0664065	Down-Hyper
SLC5A3	-0.7361	7.8509e-08	-2.18982	1.61957e-40	0.144692	Down-Hyper
SLC5A9	-0.814778	3.17158e-10	-3.2144	1.96411e-25	0.0523978	Down-Hyper
SLC6A19	-0.609179	3.1272e-05	-9.58484	2.91966e-107	0.108599	Down-Hyper
SLC7A9	-0.823789	1.50572e-10	-3.96907	3.31984e-25	0.256037	Down-Hyper
SLCO4C1	-0.608776	3.17131e-05	-5.66793	5.38421e-66	0.135926	Down-Hyper
SMAGP	-0.834261	5.77938e-11	-1.74883	1.95751e-10	0.153693	Down-Hyper
SMIM6	-0.702618	5.00936e-07	-5.07837	1.68662e-22	0.132691	Down-Hyper
SMTN	-0.689592	9.74159e-07	-1.13282	2.32752e-06	0.155875	Down-Hyper
SMTNL2	-0.748271	3.75567e-08	-3.79869	6.48961e-22	0.106048	Down-Hyper
SOD3	-0.587352	6.95903e-05	-1.57744	3.24522e-06	0.116201	Down-Hyper
SOX13	-0.775231	5.92678e-09	-1.26691	5.57323e-09	0.107387	Down-Hyper
SOX18	-0.502636	0.000944071	-1.23812	1.69247e-07	0.0790323	Down-Hyper
SPATA13	-0.629644	1.40306e-05	-1.15351	1.5131e-06	0.0613456	Down-Hyper
SPESP1	-0.832632	6.66842e-11	-1.49494	0.0324116	0.105177	Down-Hyper
ST14	-0.607201	3.36489e-05	-2.36613	1.39156e-16	0.145646	Down-Hyper
STAP2	-0.571513	0.00011919	-1.02772	2.38312e-05	0.157716	Down-Hyper
STK32B	-0.566261	0.000140759	-3.22035	2.93187e-23	0.0822127	Down-Hyper
STON2	-0.513702	0.000694394	-1.29163	9.13279e-05	0.0745556	Down-Hyper
SUSD2	-0.809041	4.9597e-10	-4.37698	3.50356e-35	0.124091	Down-Hyper
SYNE2	-0.84585	2.43714e-11	-1.60329	9.57437e-20	0.174763	Down-Hyper
TAL1	-0.540687	0.000314206	-1.83595	8.50304e-24	0.10493	Down-Hyper
TBC1D24	-0.643323	8.06792e-06	-1.29907	2.47904e-14	0.0494224	Down-Hyper
TBX6	-0.515151	0.000666821	-1.31322	0.000115306	0.0743393	Down-Hyper
TBXA2R	-0.558035	0.000184914	-2.06884	3.13934e-13	0.0935697	Down-Hyper
TCN2	-0.626832	1.55865e-05	-1.43485	1.89598e-11	0.0715239	Down-Hyper
TDRD1	-0.747379	3.92946e-08	-2.7031	5.73384e-08	0.0640195	Down-Hyper
TDRD5	-0.453784	0.0032769	-2.84618	1.03702e-10	0.19896	Down-Hyper
TDRD9	-0.746368	4.16927e-08	-2.47174	6.18273e-12	0.214409	Down-Hyper
TEK	-0.474522	0.00198722	-3.052	3.36008e-40	0.108312	Down-Hyper
TEX264	-0.724649	1.4956e-07	-1.15835	1.54409e-15	0.0486447	Down-Hyper
THPO	-0.5337	0.0003893	-2.80022	2.41706e-10	0.0293288	Down-Hyper
TICAM1	-0.593098	5.66189e-05	-1.2472	1.61617e-06	0.0280606	Down-Hyper
TIE1	-0.514625	0.000676589	-1.62237	1.03894e-20	0.00031667	Down-Hyper
TINAG	-0.592543	5.76455e-05	-8.32884	1.05637e-38	0.11633	Down-Hyper
TINAGL1	-0.838922	3.91189e-11	-3.40189	3.3007e-44	0.283741	Down-Hyper
TM4SF18	-0.697892	6.41247e-07	-1.83228	1.25165e-16	0.205773	Down-Hyper
TMBIM1	-0.724135	1.54178e-07	-1.24268	8.0758e-07	0.178286	Down-Hyper
TMCO4	-0.688933	1.00349e-06	-1.2962	2.38827e-16	0.0211895	Down-Hyper
TMEM101	-0.523833	0.000519659	-1.23418	2.5207e-13	0.0491002	Down-Hyper
TMEM120A	-0.466992	0.00238959	-1.31107	1.54638e-17	0.0692781	Down-Hyper
TMEM139	-0.705216	4.40127e-07	-3.69679	3.66145e-22	0.285564	Down-Hyper
TMEM171	-0.679784	1.57573e-06	-3.85478	5.90366e-22	0.265569	Down-Hyper
TMEM174	-0.739853	6.30527e-08	-8.17708	5.63432e-66	0.0973467	Down-Hyper
TMEM176B	-0.840767	3.64569e-11	-1.60423	1.27083e-07	0.0689092	Down-Hyper
TMEM213	-0.772699	7.03555e-09	-8.79499	2.73204e-61	0.198511	Down-Hyper
TMEM25	-0.464169	0.00254768	-1.10971	7.42568e-16	0.0551716	Down-Hyper
TMEM30B	-0.872624	1.46723e-12	-3.24939	2.46803e-17	0.168301	Down-Hyper
TMEM51	-0.660891	3.80063e-06	-2.12353	1.28044e-18	0.0944977	Down-Hyper
TMEM52B	-0.546964	0.000263368	-7.24501	3.37937e-39	0.0242577	Down-Hyper
TMEM72	-0.627681	1.51028e-05	-5.69543	8.96448e-43	0.195779	Down-Hyper
TMEM82	-0.588535	6.66656e-05	-6.73028	1.66994e-27	0.0861287	Down-Hyper
TMPRSS13	-0.565491	0.000144478	-1.59939	7.26314e-05	0.0630988	Down-Hyper
TMPRSS2	-0.801252	9.36319e-10	-6.23054	6.74904e-58	0.168088	Down-Hyper
TNFRSF10A	-0.645314	7.41395e-06	-1.16987	6.45898e-05	0.158746	Down-Hyper
TNFRSF11B	-0.717636	2.1908e-07	-2.94605	5.95781e-16	0.0990058	Down-Hyper
TNFSF13	-0.79084	1.98764e-09	-1.56772	6.25515e-09	0.103829	Down-Hyper
TNK1	-0.526371	0.000484445	-2.19806	3.62466e-14	0.0921429	Down-Hyper
TNS1	-0.78643	2.71195e-09	-1.47363	2.87004e-13	0.144292	Down-Hyper
TNS4	-0.627515	1.5162e-05	-4.18189	2.82166e-22	0.079439	Down-Hyper
TOB1	-0.785375	2.88111e-09	-1.85259	2.24319e-19	0.163878	Down-Hyper
TOM1L1	-0.582891	8.19789e-05	-1.74099	5.34634e-12	0.0762574	Down-Hyper
TREH	-0.748802	3.62918e-08	-6.62315	3.81419e-42	0.0675654	Down-Hyper
TRPM3	-0.64317	8.07842e-06	-3.3636	1.42825e-15	0.067949	Down-Hyper
TRPV6	-0.830406	8.24919e-11	-4.04556	6.39598e-18	0.126753	Down-Hyper
TSPAN1	-0.662911	3.46258e-06	-3.76376	1.32223e-25	0.122539	Down-Hyper
TTC22	-0.587499	6.92869e-05	-3.74231	1.42079e-29	0.2342	Down-Hyper
TTC38	-0.648748	6.42312e-06	-1.75278	5.52338e-30	0.0663375	Down-Hyper
UGT1A6	-0.747575	3.89278e-08	-6.55199	9.21009e-25	0.13099	Down-Hyper
UGT8	-0.720026	1.90959e-07	-3.54167	1.59853e-17	0.119181	Down-Hyper
UNC5CL	-0.857736	8.0951e-12	-3.33474	4.94966e-46	0.107116	Down-Hyper
USH1C	-0.621558	1.91669e-05	-4.55503	2.45856e-41	0.160083	Down-Hyper
USHBP1	-0.501351	0.000980861	-2.32674	1.66763e-17	0.0736153	Down-Hyper
USP53	-0.470437	0.00219549	-1.51195	4.56155e-20	0.0173616	Down-Hyper
VAMP8	-0.583364	8.07058e-05	-1.19453	1.48769e-07	0.199307	Down-Hyper
VAV3	-0.705402	4.38054e-07	-1.88758	1.90671e-16	0.0544118	Down-Hyper
VEPH1	-0.789195	2.22684e-09	-3.50019	2.15691e-36	0.123821	Down-Hyper
VTCN1	-0.677982	1.72273e-06	-3.48515	6.43526e-22	0.104872	Down-Hyper
WDR72	-0.463008	0.00261232	-6.66516	4.83071e-55	0.091292	Down-Hyper
WWP2	-0.494598	0.00117547	-1.10601	1.40445e-16	0.0669529	Down-Hyper
ZHX3	-0.726087	1.39702e-07	-1.74693	4.59513e-20	0.0720976	Down-Hyper
ZNF154	-0.54664	0.000266046	-1.61868	1.69794e-06	0.432168	Down-Hyper
ZNF204P	-0.619763	2.0626e-05	-1.97817	5.21936e-11	0.0586565	Down-Hyper
ZNF44	-0.521198	0.000559551	-1.25173	1.7779e-30	0.100453	Down-Hyper
ZNF684	-0.783617	3.15804e-09	-1.31019	1.49571e-29	0.035703	Down-Hyper
ZNF878	-0.585023	7.60235e-05	-2.04806	2.11479e-05	0.0850234	Down-Hyper
ABAT	0.466829	0.00239801	-2.09737	2.55815e-18	-0.0889718	Down-Hypo
ABCA3	0.524283	0.00051352	-1.17984	3.57615e-10	-0.0619484	Down-Hypo
ABCB1	0.450805	0.00352229	-2.49305	4.68252e-11	-0.0653779	Down-Hypo
ACKR2	0.476743	0.00189043	-1.89565	7.74315e-12	-0.0748513	Down-Hypo
ACOT11	0.614336	2.57292e-05	-1.95899	1.82976e-19	-0.0939418	Down-Hypo
ACPP	0.719354	1.98066e-07	-3.41945	6.30213e-34	-0.152639	Down-Hypo
ACSS1	0.55557	0.000199845	-2.08735	1.49978e-24	-0.0848379	Down-Hypo
AFM	0.496447	0.00111787	-8.94176	6.35946e-51	-0.0289526	Down-Hypo
AGTR1	0.599328	4.54128e-05	-3.78752	1.60734e-22	-0.125635	Down-Hypo
AIF1L	0.554809	0.000204879	-3.35915	6.10364e-42	-0.0959482	Down-Hypo
AIM1	0.744293	4.75745e-08	-2.2775	8.24445e-17	-0.0613311	Down-Hypo
AKAP3	0.460245	0.00279683	-1.03297	8.24632e-05	-0.0752878	Down-Hypo
AMY2B	0.465349	0.00248085	-1.49189	5.01034e-11	-0.0711875	Down-Hypo
ANK2	0.61357	2.64682e-05	-1.41257	2.66147e-11	-0.0634732	Down-Hypo
ANKRD24	0.671106	2.36121e-06	-2.67718	6.55935e-19	-0.148474	Down-Hypo
AOC1	0.657464	4.42922e-06	-7.58022	1.92803e-42	-0.122491	Down-Hypo
ATP6V1C2	0.679168	1.6218e-06	-5.07541	1.80272e-170	-0.143107	Down-Hypo
BAIAP2L1	0.471359	0.00214973	-1.53432	4.6109e-07	-0.0319918	Down-Hypo
BAIAP3	0.634159	1.1721e-05	-2.41914	6.24537e-12	-0.08419	Down-Hypo
BDKRB1	0.600732	4.31031e-05	-2.62681	7.03584e-08	-0.163364	Down-Hypo
C10orf126	0.684321	1.26588e-06	-4.60753	1.64044e-18	-0.0627222	Down-Hypo
C19orf77	0.569847	0.000125171	-6.43557	6.09301e-35	-0.122618	Down-Hypo
C1orf115	0.570064	0.000124532	-3.10503	1.01381e-28	-0.0248711	Down-Hypo
CALCR	0.517984	0.000616553	-4.33149	1.38957e-16	-0.100972	Down-Hypo
CCDC158	0.554234	0.000208621	-2.23528	9.89758e-11	-0.132873	Down-Hypo
CHRM3	0.603795	3.84505e-05	-2.2086	3.61442e-15	-0.0764953	Down-Hypo
CLIC5	0.47747	0.00185917	-3.29933	1.85178e-12	-0.0377326	Down-Hypo
CLNK	0.457534	0.00299126	-4.0814	1.40356e-36	-0.103512	Down-Hypo
CNGA1	0.698424	6.25053e-07	-2.96506	5.15657e-17	-0.0724608	Down-Hypo
CSNK2A3	0.594133	5.46678e-05	-1.11153	1.87957e-05	-0.0257346	Down-Hypo
CYP2B6	0.580024	8.97377e-05	-5.69827	1.99917e-33	-0.170753	Down-Hypo
CYP4F3	0.530927	0.000422792	-8.06413	3.17708e-78	-0.11351	Down-Hypo
DCPS	0.453518	0.00329471	-1.4952	1.03139e-16	-0.146033	Down-Hypo
DENND2D	-0.534093	0.00038462	-1.31629	5.09013e-06	-0.0411069	Down-Hypo
DLGAP2	0.545191	0.000276076	-1.56284	2.03435e-05	-0.0929551	Down-Hypo
EFCAB6	0.527228	0.000473126	-1.07599	3.49597e-07	-0.101899	Down-Hypo
EFNA1	0.673497	2.11212e-06	-1.59532	1.92317e-09	-0.0219903	Down-Hypo
ELFN1	0.56772	0.000133998	-1.89422	2.58566e-07	-0.140196	Down-Hypo
ESRRB	0.728249	1.23224e-07	-4.28683	4.57744e-47	-0.073125	Down-Hypo
ETFB	0.570224	0.000123952	-1.40281	1.15949e-17	-0.235417	Down-Hypo
FAM160A1	0.556529	0.000193837	-1.48998	9.29727e-11	-0.0716649	Down-Hypo
FBXL16	0.62718	1.53685e-05	-2.5209	2.24015e-08	-0.0803862	Down-Hypo
FER1L6	0.593894	5.49761e-05	-4.60628	7.49625e-19	-0.0730865	Down-Hypo
FGF1	0.674814	1.97604e-06	-3.47066	2.85094e-25	-0.0895844	Down-Hypo
FLRT1	0.5306	0.00042693	-2.48872	1.66648e-08	-0.169214	Down-Hypo
FOXI1	0.645407	7.39594e-06	-9.01651	1.83758e-58	-0.0998658	Down-Hypo
FOXP2	0.735122	8.25751e-08	-3.45476	1.40863e-07	-0.167606	Down-Hypo
FSTL4	0.634114	1.17229e-05	-2.11759	3.10739e-10	-0.0926249	Down-Hypo
GABRA2	0.480693	0.00171118	-4.85765	8.9032e-27	-0.00734292	Down-Hypo
GALM	0.613282	2.67123e-05	-1.71652	2.04987e-18	-0.0448298	Down-Hypo
GDA	0.507132	0.000835933	-4.69831	1.07506e-24	-0.0898284	Down-Hypo
GNG7	0.648704	6.42337e-06	-2.04382	1.41659e-13	-0.0537888	Down-Hypo
GP2	0.469398	0.00224892	-9.56215	1.65447e-108	-0.205397	Down-Hypo
GPRC5C	0.731405	1.02731e-07	-1.7508	8.64342e-15	-0.0574261	Down-Hypo
GRIP2	0.558495	0.000182323	-3.1904	1.85686e-12	-0.0484173	Down-Hypo
HECW1	0.469456	0.00224741	-4.81861	1.25901e-31	-0.0581582	Down-Hypo
HELT	0.74504	4.55013e-08	-5.29688	4.28449e-18	-0.0717444	Down-Hypo
HEPACAM2	0.623795	1.75121e-05	-6.54178	1.01945e-41	-0.155508	Down-Hypo
HNF4G	0.468363	0.00230758	-4.10866	1.72536e-25	-0.18191	Down-Hypo
IL1RL1	0.505303	0.000876176	-3.78257	1.72733e-16	-0.0949887	Down-Hypo
KBTBD12	0.530412	0.000429121	-2.29352	2.33525e-06	-0.0232542	Down-Hypo
KCNE1	0.524605	0.000509292	-2.74709	6.49376e-12	-0.0508312	Down-Hypo
KCNIP4	0.49659	0.00111476	-2.40412	7.45302e-11	-0.165133	Down-Hypo
KLC3	0.583808	7.94166e-05	-2.97708	1.86284e-12	-0.207929	Down-Hypo
KMO	0.46205	0.00266976	-2.35952	5.64093e-07	-0.0705118	Down-Hypo
LCA5L	0.551451	0.000228421	-1.05408	1.3557e-05	-0.0788526	Down-Hypo
LGSN	0.638941	9.61037e-06	-5.42857	1.94817e-20	-0.111273	Down-Hypo
LINC00504	0.642986	8.11628e-06	-1.49612	0.000119291	-0.325703	Down-Hypo
LPL	0.463996	0.00255732	-2.58716	1.86866e-13	-0.105922	Down-Hypo
LRP1B	0.501054	0.000986659	-2.63847	2.77671e-06	-0.249382	Down-Hypo
MAL2	0.524506	0.000510372	-2.72926	2.31074e-14	-0.146307	Down-Hypo
MAPT	0.573518	0.000112461	-2.06998	8.52808e-10	-0.0391074	Down-Hypo
MCF2L	0.534932	0.000375644	-1.83793	3.45744e-14	-0.0830518	Down-Hypo
MEI4	0.789953	2.11621e-09	-5.00948	6.26432e-26	-0.269815	Down-Hypo
MRPS36	0.527995	0.000461804	-1.05925	5.58287e-07	-0.10902	Down-Hypo
MSRA	0.662955	3.46258e-06	-1.68312	1.31063e-16	-0.0705304	Down-Hypo
NDUFS8	0.54352	0.000289402	-1.0066	1.60796e-16	-0.0410396	Down-Hypo
NEU1	0.654126	5.11814e-06	-1.00224	1.82864e-06	-0.063001	Down-Hypo
NHLRC4	0.512838	0.000712081	-2.17216	8.44484e-12	-0.150186	Down-Hypo
NOS1	0.774311	6.22947e-09	-5.10963	4.77421e-30	-0.150477	Down-Hypo
OPA3	0.714977	2.57258e-07	-1.26883	5.84125e-20	-0.112539	Down-Hypo
PDE2A	0.49468	0.0011738	-2.59867	6.45399e-29	-0.0765343	Down-Hypo
PDGFA	0.506885	0.000840551	-1.0022	7.96344e-05	-0.0457302	Down-Hypo
PDP2	0.755526	2.31673e-08	-1.87963	1.06061e-24	-0.112998	Down-Hypo
PEPD	0.562751	0.000158238	-2.12315	3.61991e-25	-0.0625408	Down-Hypo
PFKFB3	0.675494	1.91878e-06	-1.72616	5.878e-08	-0.0468976	Down-Hypo
PLCH2	0.508714	0.000800072	-3.50011	9.86342e-20	-0.0394494	Down-Hypo
PLIN4	0.617014	2.30236e-05	-2.99503	6.45864e-14	-0.0936382	Down-Hypo
PPFIA2	0.49888	0.00104852	-2.58633	1.13097e-12	-0.115495	Down-Hypo
PPP2R2B	0.451113	0.00349714	-1.30103	0.000860248	-0.0505627	Down-Hypo
PRKAB1	0.554241	0.000208621	-1.60833	5.88364e-19	-0.052677	Down-Hypo
PRKAG2	0.746772	4.06758e-08	-1.52335	3.19065e-23	-0.091207	Down-Hypo
PRKCZ	0.509503	0.000782268	-1.89875	4.9957e-15	-0.0983849	Down-Hypo
PRSS16	0.651962	5.5811e-06	-2.48212	3.44477e-06	-0.115514	Down-Hypo
PRSS22	0.483612	0.00158757	-4.51866	1.9289e-16	-0.0618039	Down-Hypo
PRUNE2	0.609354	3.10895e-05	-2.0612	4.80539e-13	-0.136278	Down-Hypo
PTH2R	0.743025	5.16601e-08	-5.38102	2.5457e-50	-0.0974395	Down-Hypo
PTPRQ	0.490382	0.00132482	-4.01807	6.74517e-12	-0.23169	Down-Hypo
RALYL	0.537381	0.000348541	-5.06125	1.36081e-17	-0.142539	Down-Hypo
RASGEF1A	0.48326	0.00160059	-2.47911	1.22018e-08	-0.0464151	Down-Hypo
RBBP8	0.61313	2.68439e-05	-1.63753	2.53633e-14	-0.044779	Down-Hypo
RCAN2	0.689746	9.68672e-07	-1.99592	1.30607e-23	-0.129727	Down-Hypo
RNF133	0.639386	9.45999e-06	-1.85154	1.09322e-06	-0.140554	Down-Hypo
RP1	0.689547	9.74159e-07	-5.27406	1.56209e-28	-0.273953	Down-Hypo
RPS6KA1	-0.481339	0.00168315	-1.01913	5.52723e-06	-0.0230681	Down-Hypo
RUNDC3B	0.473679	0.00202888	-2.73994	5.63494e-11	-0.142567	Down-Hypo
SATB2	0.723805	1.56361e-07	-2.276	5.1723e-12	-0.0666594	Down-Hypo
SCIN	0.483415	0.00159502	-4.66094	7.14692e-29	-0.0152154	Down-Hypo
SCN2A	0.521576	0.000555223	-3.0966	3.3694e-13	-0.121728	Down-Hypo
SCN9A	0.47172	0.00213075	-1.4782	3.87863e-05	-0.0935345	Down-Hypo
SCNN1G	0.629172	1.42592e-05	-7.03425	5.36875e-68	-0.0444227	Down-Hypo
SELP	0.486031	0.00148748	-1.91395	3.15638e-07	-0.197081	Down-Hypo
SHANK2	0.54246	0.000298303	-4.49019	5.94951e-39	-0.0275441	Down-Hypo
SLC16A11	0.626001	1.60904e-05	-2.21457	1.03414e-07	-0.0742854	Down-Hypo
SLC22A23	0.488554	0.00139158	-1.21579	5.26825e-08	-0.058753	Down-Hypo
SLC5A1	0.541945	0.00030267	-4.6659	7.18394e-20	-0.0971927	Down-Hypo
SLC6A17	0.660707	3.82803e-06	-3.3611	7.67e-16	-0.105808	Down-Hypo
SOWAHA	0.511453	0.000739027	-3.93671	4.19094e-24	-0.0931509	Down-Hypo
STX3	0.557924	0.000185425	-2.00209	4.29957e-15	-0.00533045	Down-Hypo
SVOPL	0.813421	3.54475e-10	-5.67356	4.44426e-27	-0.0914304	Down-Hypo
SYBU	0.482763	0.00162205	-1.68639	1.86433e-08	-0.147668	Down-Hypo
TCL6	0.705413	4.38054e-07	-4.01445	4.17451e-28	-0.11251	Down-Hypo
TFAP2B	0.693881	7.88771e-07	-6.8379	3.96208e-23	-0.119646	Down-Hypo
TJP3	0.632821	1.2288e-05	-4.26093	3.1927e-23	-0.0486404	Down-Hypo
TMEM38B	0.506407	0.000850394	-1.31417	6.45457e-08	-0.112611	Down-Hypo
TOB2	0.499341	0.00103505	-1.02491	2.623e-18	-0.00469618	Down-Hypo
TRPV4	0.518611	0.000606276	-3.07189	4.48824e-44	-0.0560889	Down-Hypo
TUBA4A	0.457124	0.00302145	-2.7325	1.6872e-20	-0.0583779	Down-Hypo
UNC13C	0.497134	0.00110184	-4.09153	5.66879e-23	-0.146003	Down-Hypo
VWA5B1	0.57312	0.000113055	-5.19299	1.6736e-16	-0.0504943	Down-Hypo
ZDHHC11	0.552576	0.000220272	-1.97261	9.10113e-13	-0.169437	Down-Hypo
ZNF165	0.476046	0.00192235	-2.31882	2.64753e-13	-0.0566699	Down-Hypo
ZNF385B	0.502767	0.000941273	-2.78349	7.93031e-19	-0.0617274	Down-Hypo
ABCB4	0.545005	0.000277528	1.15606	0.00130071	0.212361	Up-Hyper
ANLN	0.514478	0.000678259	4.05879	6.68202e-32	0.0820242	Up-Hyper
ARHGEF4	0.479715	0.00175272	1.04329	0.00521309	0.117104	Up-Hyper
ARMC4	0.541349	0.000307848	2.86263	3.39795e-12	0.0783236	Up-Hyper
ASNS	0.509587	0.000781504	1.12685	1.72808e-08	0.117961	Up-Hyper
C1R	0.736981	7.44673e-08	1.4016	3.82287e-06	0.0408809	Up-Hyper
CCNE1	0.45624	0.00308778	1.27953	8.3166e-06	0.0399834	Up-Hyper
CD47	0.543347	0.000290793	1.48286	7.47499e-14	0.272137	Up-Hyper
CENPW	0.617709	2.2404e-05	2.78799	1.31221e-21	0.0669751	Up-Hyper
CMTM1	0.608399	3.21238e-05	1.29657	8.04653e-06	0.0388102	Up-Hyper
COL1A2	-0.515893	0.000654119	2.40653	8.60431e-09	0.121543	Up-Hyper
DCHS2	0.552235	0.0002224	2.61451	4.11021e-16	0.11502	Up-Hyper
ECT2	0.72989	1.12534e-07	1.60105	1.87726e-10	0.304499	Up-Hyper
FANCI	0.705627	4.3497e-07	2.55931	4.64486e-28	0.171174	Up-Hyper
FKBP11	0.492339	0.00125342	1.20173	1.34528e-11	0.0479502	Up-Hyper
FKBP7	0.595296	5.23947e-05	1.92047	2.80027e-20	0.0792776	Up-Hyper
GLIPR2	0.759323	1.85088e-08	2.20774	1.45651e-18	0.213864	Up-Hyper
GRIN2A	0.670444	2.4407e-06	2.21582	1.7682e-09	0.289258	Up-Hyper
GRM7	0.519561	0.000588665	3.8745	4.45644e-13	0.0671194	Up-Hyper
HIST1H4J	0.63452	1.15689e-05	1.54854	1.37159e-07	0.185817	Up-Hyper
IL17RD	0.539609	0.000325286	2.30067	1.92023e-18	0.0489444	Up-Hyper
KDM5B	0.641897	8.50328e-06	1.09384	2.46653e-12	0.196186	Up-Hyper
KIAA1211	0.515483	0.000661998	2.01169	3.94812e-15	0.0293765	Up-Hyper
KIF11	0.494779	0.00117156	2.99627	2.20377e-25	0.319256	Up-Hyper
KIF3C	0.610134	3.02655e-05	1.61412	1.06653e-13	0.158144	Up-Hyper
MDFI	0.657328	4.44077e-06	2.68036	5.26688e-08	0.111851	Up-Hyper
MEST	0.569998	0.000124669	3.03179	1.18462e-43	0.0769058	Up-Hyper
NGFR	0.499621	0.00102738	2.32304	2.14016e-10	0.118715	Up-Hyper
OPRL1	0.511593	0.000736583	1.27988	1.60136e-06	0.0515752	Up-Hyper
PCDHB18	0.472992	0.00206635	2.6908	8.61042e-14	0.175756	Up-Hyper
PDE5A	0.509569	0.000781504	1.54559	7.82976e-06	0.0360377	Up-Hyper
PNMA2	0.638095	9.9816e-06	2.25481	9.29898e-14	0.156699	Up-Hyper
POLE2	0.542496	0.000298303	2.45421	1.09195e-13	0.0640554	Up-Hyper
RGS22	0.477085	0.00187515	2.36353	1.16246e-11	0.134913	Up-Hyper
RRM2	0.474471	0.00198809	2.46973	4.7541e-17	0.058239	Up-Hyper
SERPINH1	0.521229	0.000559551	1.35702	4.26426e-17	0.130419	Up-Hyper
SKA1	0.69515	7.43181e-07	3.98001	7.45477e-11	0.14574	Up-Hyper
SNRPF	0.506309	0.000852058	1.14189	1.05543e-10	0.16158	Up-Hyper
SUSD5	0.577205	9.89857e-05	1.51454	6.86634e-07	0.191667	Up-Hyper
TBL1XR1	0.481423	0.00168077	1.14523	4.00358e-20	0.0377617	Up-Hyper
TTK	-0.595783	5.16005e-05	4.29531	1.75528e-29	0.00215637	Up-Hyper
ZIK1	0.506804	0.000840886	1.15647	6.95133e-08	0.163873	Up-Hyper
AADAT	-0.466735	0.00240196	1.34049	5.46658e-14	-0.0323042	Up-Hypo
ABCA1	-0.753491	2.68965e-08	1.70615	9.01472e-19	-0.0955665	Up-Hypo
ACAN	-0.456277	0.00308763	1.63728	3.56637e-05	-0.0629221	Up-Hypo
ACTA2	-0.476564	0.00189815	1.02211	0.00147066	-0.132369	Up-Hypo
ADAM19	-0.644923	7.54124e-06	1.61862	1.29997e-16	-0.0425698	Up-Hypo
ADCY7	-0.840992	3.64569e-11	1.78212	2.83162e-12	-0.0741426	Up-Hypo
AFAP1	-0.713792	2.75546e-07	1.12334	2.14171e-10	-0.0812339	Up-Hypo
AFF3	-0.628347	1.47289e-05	2.14703	5.48629e-13	-0.105089	Up-Hypo
AKNA	-0.677844	1.73122e-06	1.13544	5.30946e-07	-0.119967	Up-Hypo
AMICA1	-0.799578	1.0512e-09	1.11089	0.00166556	-0.0958133	Up-Hypo
AMOTL1	-0.556295	0.000195182	1.15409	5.32466e-15	-0.117776	Up-Hypo
ANKRD50	-0.731513	1.02415e-07	1.67943	4.28062e-18	-0.130555	Up-Hypo
AOAH	-0.528427	0.000455756	1.51175	1.03281e-06	-0.101871	Up-Hypo
AOAH-IT1	-0.594858	5.31781e-05	1.45502	0.000252615	-0.0915216	Up-Hypo
APBA2	-0.806444	6.11343e-10	4.06654	6.08533e-30	-0.0585118	Up-Hypo
APBB1IP	-0.661286	3.73257e-06	1.5003	1.75261e-05	-0.0995194	Up-Hypo
APOBEC3C	-0.737532	7.26275e-08	2.04183	8.42015e-13	-0.11955	Up-Hypo
ARHGAP20	-0.573321	0.000112671	1.85492	8.91427e-07	-0.0351869	Up-Hypo
ARHGAP22	-0.767588	1.03779e-08	2.01311	9.4099e-12	-0.113419	Up-Hypo
ARHGAP25	-0.710878	3.24489e-07	1.13195	1.5621e-06	-0.171575	Up-Hypo
ARHGAP30	-0.784015	3.12592e-09	1.42796	7.15511e-05	-0.076204	Up-Hypo
ARHGEF2	-0.685332	1.20809e-06	1.03815	4.58932e-11	-0.0946887	Up-Hypo
ASAP1	-0.640535	9.04369e-06	1.21104	1.73108e-19	-0.113083	Up-Hypo
ASB2	-0.573738	0.000111678	1.00548	0.0232063	-0.0700891	Up-Hypo
ASIC1	-0.620863	1.97043e-05	1.2087	0.000335686	-0.061718	Up-Hypo
AXIN2	-0.815642	2.94165e-10	1.56885	6.9822e-08	-0.331669	Up-Hypo
BACH2	-0.806167	6.12821e-10	1.83486	2.13112e-15	-0.0986305	Up-Hypo
BASP1	-0.453207	0.00331583	1.77686	5.92351e-22	-0.0431642	Up-Hypo
BICD1	-0.725296	1.44364e-07	1.29575	2.35844e-09	-0.0245265	Up-Hypo
BIN2	-0.776896	5.18053e-09	1.16066	0.0015027	-0.0785663	Up-Hypo
BMF	-0.653205	5.3017e-06	1.00744	0.000102933	-0.0864446	Up-Hypo
BOC	-0.816167	2.82806e-10	2.14272	9.34204e-13	-0.175333	Up-Hypo
BRCA1	-0.490081	0.00133316	1.7131	5.7765e-15	-0.142544	Up-Hypo
C16orf54	-0.503783	0.00091432	1.29299	0.00126424	-0.123208	Up-Hypo
C1orf21	-0.649802	6.1088e-06	1.11169	2.59551e-12	-0.0789369	Up-Hypo
C1QB	-0.728704	1.20477e-07	2.59355	1.87032e-11	-0.112076	Up-Hypo
C1QTNF3	-0.695394	7.34779e-07	1.12066	0.000719555	-0.200773	Up-Hypo
C1QTNF4	-0.523844	0.000519659	1.25512	0.00140926	-0.0655154	Up-Hypo
C1QTNF7	-0.613935	2.61396e-05	1.10278	6.48863e-06	-0.131095	Up-Hypo
C1S	-0.762739	1.48515e-08	1.4212	5.09987e-05	-0.0818047	Up-Hypo
C3AR1	-0.508354	0.000808198	1.91081	6.0511e-08	-0.130689	Up-Hypo
C3orf67	-0.699532	5.90414e-07	1.75563	1.23034e-11	-0.0779769	Up-Hypo
CABYR	-0.4806	0.00171404	3.5306	3.59718e-16	-0.0242261	Up-Hypo
CACNB3	-0.700992	5.45834e-07	1.79595	1.15277e-17	-0.0497674	Up-Hypo
CAMK2D	-0.481257	0.00168541	1.14609	4.28029e-10	-0.0214606	Up-Hypo
CCDC109B	-0.762297	1.52859e-08	1.59391	1.23242e-12	-0.119541	Up-Hypo
CCDC3	-0.477172	0.00187309	1.48058	3.9783e-07	-0.0705133	Up-Hypo
CCND2	-0.749671	3.41945e-08	2.54796	8.57926e-17	-0.0190646	Up-Hypo
CCR2	-0.548074	0.000254237	1.35621	0.000247097	-0.0659384	Up-Hypo
CD163	-0.598518	4.65943e-05	1.64814	5.5208e-07	-0.0682368	Up-Hypo
CD1D	-0.588654	6.655e-05	2.00643	4.98419e-12	-0.111248	Up-Hypo
CD244	-0.546167	0.000268467	1.55229	0.000678319	-0.0868657	Up-Hypo
CD276	-0.650086	6.03637e-06	1.72321	6.38256e-25	-0.104586	Up-Hypo
CD28	-0.500396	0.00100559	1.50587	0.000217429	-0.121966	Up-Hypo
CD33	-0.472787	0.00207416	1.27486	0.000103687	-0.121492	Up-Hypo
CD36	-0.560314	0.000171722	1.46802	0.000627628	-0.114009	Up-Hypo
CD4	-0.647821	6.67443e-06	1.3638	5.70349e-05	-0.0301799	Up-Hypo
CD48	-0.712586	2.9436e-07	2.17889	5.58941e-10	-0.272782	Up-Hypo
CD7	-0.650224	6.00807e-06	1.53415	5.07506e-05	-0.0767605	Up-Hypo
CD86	-0.639755	9.33185e-06	1.90418	5.97424e-06	-0.134732	Up-Hypo
CD96	-0.662186	3.5875e-06	2.03173	7.05498e-10	-0.185675	Up-Hypo
CDC25C	-0.531023	0.000422426	4.49471	4.96981e-18	-0.0661843	Up-Hypo
CDCA4	-0.650875	5.84157e-06	1.57608	4.83893e-11	-0.0610463	Up-Hypo
CDCA5	-0.762928	1.47234e-08	3.38021	2.96864e-17	-0.0813518	Up-Hypo
CDCA7	-0.586273	7.25488e-05	4.38126	3.47048e-27	-0.0126288	Up-Hypo
CDH11	-0.760738	1.66615e-08	2.39507	8.30652e-17	-0.11484	Up-Hypo
CDH23	-0.560058	0.000172879	1.91917	3.74628e-11	-0.0560032	Up-Hypo
CDH24	-0.735365	8.18636e-08	1.98128	2.27065e-08	-0.0997213	Up-Hypo
CDK2AP1	-0.675802	1.89656e-06	1.17379	2.75532e-10	-0.105451	Up-Hypo
CDK6	-0.580501	8.8338e-05	1.59261	4.59433e-09	-0.0209883	Up-Hypo
CDO1	-0.537982	0.000342282	2.04557	9.79054e-10	-0.0628952	Up-Hypo
CDON	-0.52487	0.000505472	2.7293	1.28921e-22	-0.0515788	Up-Hypo
CENPL	-0.647755	6.67443e-06	1.70448	8.61195e-24	-0.17629	Up-Hypo
CEP170	-0.785665	2.85512e-09	1.68755	7.28406e-41	-0.0732347	Up-Hypo
CHN1	-0.559505	0.000176186	1.97719	3.77388e-22	-0.0380788	Up-Hypo
CHST10	-0.718838	2.03353e-07	1.24445	4.75454e-10	-0.0752441	Up-Hypo
CILP	-0.688344	1.03213e-06	2.60255	3.93261e-12	-0.178632	Up-Hypo
CLEC12A	-0.522547	0.000540403	1.26139	0.000588505	-0.208441	Up-Hypo
CLEC2B	-0.455516	0.00314207	1.15386	1.10386e-05	-0.176523	Up-Hypo
CLEC2D	-0.720511	1.86373e-07	1.4635	2.73491e-13	-0.0933066	Up-Hypo
CLEC4A	-0.619603	2.07368e-05	1.0937	1.22876e-09	-0.0685751	Up-Hypo
CMKLR1	-0.495224	0.00115846	1.24116	3.68977e-05	-0.0995496	Up-Hypo
CMTM3	-0.742868	5.19845e-08	1.43901	1.18155e-10	-0.153639	Up-Hypo
CNTNAP2	-0.540316	0.000317856	4.12395	7.36705e-31	-0.0441005	Up-Hypo
COL3A1	-0.768643	9.58347e-09	3.65817	6.62446e-28	-0.149549	Up-Hypo
COL5A1	-0.604631	3.72338e-05	2.74117	1.05872e-20	-0.0215444	Up-Hypo
COL5A2	-0.542951	0.000294452	2.74966	4.27097e-27	-0.062504	Up-Hypo
COL6A3	-0.78419	3.12384e-09	2.79177	1.21343e-20	-0.084742	Up-Hypo
COLQ	-0.535113	0.000373794	1.12434	1.31174e-07	-0.125514	Up-Hypo
CRISPLD1	-0.62575	1.62278e-05	3.36104	4.4472e-25	-0.0908285	Up-Hypo
CSF1R	-0.705227	4.40127e-07	1.21901	5.78637e-05	-0.0611577	Up-Hypo
CTSW	-0.699425	5.92335e-07	1.41961	0.00249494	-0.0773791	Up-Hypo
DACT3	-0.804759	6.87637e-10	1.13987	0.00105886	-0.0787179	Up-Hypo
DAPP1	-0.515079	0.00066762	1.40314	5.63986e-05	-0.187986	Up-Hypo
DBN1	-0.568417	0.000130888	1.05477	1.94229e-09	-0.0965406	Up-Hypo
DCHS1	-0.805653	6.36947e-10	1.30505	2.35598e-09	-0.0714222	Up-Hypo
DCN	-0.609486	3.09809e-05	1.15609	0.00546398	-0.15197	Up-Hypo
DLEU2	-0.538657	0.000335687	1.62905	3.45744e-14	-0.17364	Up-Hypo
DLGAP1	-0.529135	0.000446211	1.83307	1.52118e-07	-0.077275	Up-Hypo
DOK2	-0.610707	2.95743e-05	1.1862	0.00027825	-0.0973393	Up-Hypo
DOK3	-0.545371	0.000275031	1.13148	0.000429493	-0.105158	Up-Hypo
DTNA	-0.597121	4.90587e-05	2.24157	6.81102e-21	-0.0521782	Up-Hypo
DUSP10	-0.505453	0.000873078	1.31638	4.74264e-06	-0.032121	Up-Hypo
DYNC1I1	-0.465823	0.0024535	1.6221	1.22555e-06	-0.182037	Up-Hypo
EDNRA	-0.774835	6.04274e-09	1.72961	3.43912e-10	-0.146749	Up-Hypo
EFCAB4B	-0.653967	5.13631e-06	1.23577	6.11873e-06	-0.0496077	Up-Hypo
EFNA4	-0.61601	2.39849e-05	1.2804	0.000410962	-0.067024	Up-Hypo
EFS	-0.629575	1.40491e-05	1.80752	1.54857e-10	-0.0422493	Up-Hypo
EGFLAM	-0.531313	0.000418836	1.48419	1.25528e-05	-0.0395184	Up-Hypo
EMP3	-0.729938	1.12534e-07	1.03393	1.35073e-05	-0.0679318	Up-Hypo
ENC1	-0.837549	4.33399e-11	3.33493	7.29056e-32	-0.10009	Up-Hypo
EPHA3	-0.478242	0.00182245	3.88286	1.15699e-41	-0.0747182	Up-Hypo
ETV1	-0.692249	8.52401e-07	2.6271	1.859e-14	-0.192922	Up-Hypo
ETV5	-0.548305	0.000252486	1.65897	2.85955e-13	-0.0888846	Up-Hypo
EVI2A	-0.727046	1.33114e-07	1.95891	2.39177e-07	-0.128719	Up-Hypo
EVL	-0.577621	9.7543e-05	1.05791	8.14501e-10	-0.109061	Up-Hypo
EXO1	-0.45204	0.00341616	3.88394	6.16448e-18	-0.0155989	Up-Hypo
FADS2	-0.763241	1.4453e-08	1.7111	5.98083e-21	-0.0744618	Up-Hypo
FAIM2	-0.752761	2.81429e-08	2.7188	2.41389e-08	-0.0996145	Up-Hypo
FAM198B	-0.45937	0.00285824	1.18171	0.00033238	-0.144256	Up-Hypo
FAM49A	-0.655928	4.72463e-06	1.40296	1.97556e-07	-0.106658	Up-Hypo
FAP	-0.65865	4.19702e-06	3.85965	5.59684e-20	-0.215598	Up-Hypo
FASLG	-0.564523	0.000149177	1.96785	0.000861531	-0.0576392	Up-Hypo
FBN1	-0.488027	0.00141037	1.53538	2.58855e-10	-0.0689329	Up-Hypo
FBXO32	-0.70596	4.27564e-07	1.46926	1.56346e-07	-0.0718305	Up-Hypo
FCGR2A	-0.668687	2.63439e-06	1.36867	3.31706e-05	-0.0953378	Up-Hypo
FCHO1	-0.557055	0.000190619	1.4733	1.35404e-05	-0.0942517	Up-Hypo
FCRL6	-0.549366	0.000243809	1.97783	9.55139e-06	-0.0978302	Up-Hypo
FERMT3	-0.617955	2.22381e-05	1.01919	0.00269563	-0.113485	Up-Hypo
FGFR1	-0.791568	1.89449e-09	1.14473	1.87672e-09	-0.091539	Up-Hypo
FLRT2	-0.694358	7.71624e-07	2.4405	2.44798e-14	-0.0720978	Up-Hypo
FMOD	-0.622023	1.88028e-05	2.27269	2.95317e-14	-0.0396404	Up-Hypo
FNDC4	-0.478137	0.00182611	1.17912	0.00417008	-0.0537467	Up-Hypo
FRMD6	-0.726752	1.3413e-07	1.31043	1.41201e-07	-0.0521044	Up-Hypo
FSTL1	-0.685244	1.20809e-06	1.59289	7.7604e-15	-0.124655	Up-Hypo
FYB	-0.508268	0.000808198	1.73229	4.53897e-07	-0.18395	Up-Hypo
FYN	-0.75154	3.03618e-08	1.73202	9.12246e-15	-0.0775637	Up-Hypo
FZD2	-0.643695	7.93991e-06	2.67513	3.38483e-21	-0.0448828	Up-Hypo
FZD7	-0.836946	4.5343e-11	2.403	5.09191e-21	-0.106293	Up-Hypo
GALNT2	-0.607115	3.37164e-05	1.02592	2.47372e-11	-0.108591	Up-Hypo
GAPT	-0.513293	0.000702685	1.85875	6.73165e-06	-0.0989699	Up-Hypo
GAS7	-0.614751	2.5308e-05	2.25641	1.82545e-19	-0.0566984	Up-Hypo
GBP5	-0.471333	0.00214973	1.02384	0.00563607	-0.0981396	Up-Hypo
GFRA1	-0.590119	6.31194e-05	1.56305	1.31733e-10	-0.00992066	Up-Hypo
GJA1	-0.581818	8.48843e-05	1.54483	1.31979e-07	-0.047061	Up-Hypo
GJC1	-0.490363	0.00132482	1.83663	1.11694e-15	-0.0290293	Up-Hypo
GLI3	-0.781844	3.55318e-09	1.41506	7.89438e-12	-0.134758	Up-Hypo
GLIPR1	-0.761685	1.58866e-08	2.37752	1.88135e-21	-0.162775	Up-Hypo
GLT8D2	-0.580577	8.82841e-05	1.98295	2.77241e-08	-0.0482723	Up-Hypo
GNB4	-0.546988	0.000263368	1.21918	6.19916e-08	-0.0342721	Up-Hypo
GNG2	-0.568483	0.000130743	1.36859	3.46041e-06	-0.046272	Up-Hypo
GPLD1	-0.518221	0.000612563	1.22967	1.18511e-05	-0.0847204	Up-Hypo
GPR161	-0.719879	1.92095e-07	2.00759	1.99745e-30	-0.0481891	Up-Hypo
GPR162	-0.560062	0.000172879	2.34096	1.31831e-07	-0.111514	Up-Hypo
GPR85	-0.533136	0.000395365	2.04799	3.66628e-09	-0.178642	Up-Hypo
GRAP2	-0.588561	6.66656e-05	1.13427	0.00871472	-0.0906818	Up-Hypo
HAS2	-0.598109	4.73157e-05	2.95884	1.66462e-13	-0.0338812	Up-Hypo
HCST	-0.761653	1.58866e-08	1.28082	0.00195822	-0.127866	Up-Hypo
HDAC9	-0.693458	8.04801e-07	2.19232	1.88313e-27	-0.0529831	Up-Hypo
HELLS	-0.581423	8.59578e-05	1.85605	7.4134e-13	-0.0433963	Up-Hypo
HIST1H2BJ	-0.538429	0.000337504	2.2016	2.12326e-15	-0.0456455	Up-Hypo
HIST3H2A	-0.521418	0.000557442	3.25358	2.27261e-26	-0.00680161	Up-Hypo
HOXA10	-0.587964	6.81093e-05	1.43296	1.18876e-05	-0.0451814	Up-Hypo
HRH1	-0.672006	2.25503e-06	1.02601	0.000958139	-0.104904	Up-Hypo
IFI16	-0.704875	4.47955e-07	1.39655	4.40939e-10	-0.16925	Up-Hypo
IGSF10	-0.594108	5.46678e-05	1.07322	0.00311956	-0.0796019	Up-Hypo
IKBKE	-0.567012	0.000137045	1.28173	4.19407e-11	-0.0467989	Up-Hypo
IL10	-0.631135	1.32181e-05	1.95798	3.64893e-05	-0.0691985	Up-Hypo
IL2RB	-0.644402	7.7031e-06	1.57131	5.63376e-05	-0.148	Up-Hypo
IL34	-0.549955	0.000239075	1.93645	1.64468e-06	-0.0865701	Up-Hypo
INHBA	-0.634384	1.16204e-05	1.35257	0.000260819	-0.178732	Up-Hypo
ISLR	-0.694993	7.47775e-07	2.34623	1.53963e-15	-0.168388	Up-Hypo
ITGA4	-0.50117	0.000985262	1.79785	2.20199e-12	-0.0639386	Up-Hypo
ITGAM	-0.526458	0.000483623	1.08773	0.0033497	-0.0990111	Up-Hypo
ITGBL1	-0.48822	0.00140385	1.26843	0.00443827	-0.0906108	Up-Hypo
ITPRIPL1	-0.538577	0.000336198	2.80238	1.66996e-09	-0.0747733	Up-Hypo
JAKMIP2	-0.590821	6.16184e-05	2.52441	4.41781e-16	-0.0214491	Up-Hypo
JAZF1	-0.569527	0.000126384	1.45726	3.91014e-14	-0.0599721	Up-Hypo
JPH4	-0.679999	1.56549e-06	2.11561	2.4443e-13	-0.0975857	Up-Hypo
KATNAL1	-0.573386	0.000112549	1.20875	4.85987e-13	-0.0296058	Up-Hypo
KAZALD1	-0.812955	3.61017e-10	1.73221	8.04326e-11	-0.277607	Up-Hypo
KCNT2	-0.658672	4.19702e-06	2.29396	5.43001e-16	-0.131235	Up-Hypo
KCTD17	-0.701787	5.25122e-07	1.51223	5.19034e-09	-0.0638406	Up-Hypo
KDM2B	-0.677624	1.74304e-06	1.36391	7.1368e-11	-0.107462	Up-Hypo
KIAA0226L	-0.740431	6.10819e-08	1.66554	1.58136e-11	-0.0724501	Up-Hypo
KIAA1199	-0.629373	1.41538e-05	2.82	4.6557e-11	-0.0678518	Up-Hypo
KIF18A	-0.597713	4.7946e-05	2.7683	6.65804e-24	-0.100703	Up-Hypo
KLRG1	-0.499786	0.00102332	1.34097	4.52289e-09	-0.0992436	Up-Hypo
LAMA4	-0.654018	5.13447e-06	2.71942	3.62983e-29	-0.128582	Up-Hypo
LAT2	-0.54425	0.000283187	1.47	2.16484e-06	-0.222072	Up-Hypo
LCP1	-0.712276	2.9913e-07	1.4264	4.22159e-05	-0.101166	Up-Hypo
LCP2	-0.563155	0.000156311	1.13947	0.000520669	-0.110998	Up-Hypo
LDLRAD3	-0.790632	2.00715e-09	1.85465	2.43099e-27	-0.0661395	Up-Hypo
LDLRAD4	-0.726003	1.39919e-07	1.57965	3.07905e-18	-0.0604214	Up-Hypo
LEF1	-0.573424	0.000112549	1.93482	4.80539e-13	-0.0142909	Up-Hypo
LGALS1	-0.537344	0.000348569	1.82519	6.13097e-10	-0.0692955	Up-Hypo
LGR6	-0.486209	0.00148128	1.43889	0.00018599	-0.0589648	Up-Hypo
LHFPL2	-0.793676	1.63635e-09	2.49259	1.38582e-26	-0.105726	Up-Hypo
LIMK1	-0.534541	0.000380191	1.32723	4.06495e-12	-0.0719262	Up-Hypo
LIMS1	-0.654742	4.98366e-06	1.17264	1.16082e-09	-0.107947	Up-Hypo
LINGO1	-0.594906	5.31573e-05	1.66987	2.55845e-06	-0.0509402	Up-Hypo
LMNB1	-0.761538	1.59324e-08	2.62772	3.75568e-32	-0.109714	Up-Hypo
LMNB2	-0.65507	4.91257e-06	1.70494	2.43196e-29	-0.0632577	Up-Hypo
LOX	-0.725895	1.40365e-07	1.38021	7.68172e-05	-0.0682962	Up-Hypo
LOXL2	-0.625165	1.66056e-05	2.11988	1.23215e-27	-0.0347836	Up-Hypo
LOXL3	-0.751919	2.98309e-08	1.64854	1.67547e-11	-0.125608	Up-Hypo
LPAR5	-0.471081	0.00216277	1.31861	8.44483e-08	-0.0542238	Up-Hypo
LRFN5	-0.624386	1.71104e-05	4.3034	1.46445e-37	-0.0731635	Up-Hypo
LRP8	-0.468073	0.00232393	2.03509	7.17385e-16	-0.0155318	Up-Hypo
LRRC17	-0.774908	6.04274e-09	2.07128	5.78384e-10	-0.161227	Up-Hypo
LRRC20	-0.739295	6.49889e-08	1.87861	1.24247e-17	-0.0859599	Up-Hypo
LRRC4C	-0.580305	8.88863e-05	2.23588	1.97228e-13	-0.136042	Up-Hypo
LRRN1	-0.534414	0.000380924	3.99525	2.44957e-29	-0.0508105	Up-Hypo
LSAMP	-0.480266	0.00172705	2.25533	1.81525e-13	-0.0681561	Up-Hypo
LSP1	-0.55546	0.000200378	1.92101	2.14707e-09	-0.0674463	Up-Hypo
LUM	-0.568511	0.000130743	1.66712	3.25596e-05	-0.12072	Up-Hypo
MAP1B	-0.622793	1.8226e-05	2.19119	1.72855e-24	-0.0119014	Up-Hypo
MAP3K12	-0.487516	0.00143017	1.05212	1.44884e-10	-0.0249261	Up-Hypo
MARCH3	-0.650237	6.00807e-06	2.57933	1.18793e-32	-0.046239	Up-Hypo
MARVELD1	-0.695655	7.2577e-07	2.06946	1.96112e-21	-0.105681	Up-Hypo
MDK	-0.611614	2.85293e-05	3.70802	4.49846e-38	-0.0138837	Up-Hypo
MEIS1	-0.556522	0.000193837	2.09158	4.00921e-12	-0.0109095	Up-Hypo
MEX3B	-0.479473	0.0017614	3.51388	7.03604e-24	-0.0122274	Up-Hypo
MFAP2	-0.843045	3.19612e-11	3.28486	3.46434e-16	-0.138285	Up-Hypo
MFAP4	-0.750988	3.13093e-08	2.67358	3.84207e-11	-0.160408	Up-Hypo
MICAL2	-0.620969	1.96455e-05	1.37539	2.51159e-06	-0.0798992	Up-Hypo
MIR125B1	-0.783996	3.12592e-09	2.58438	1.49067e-10	-0.260265	Up-Hypo
MMP2	-0.591304	6.05316e-05	2.0357	3.84973e-11	-0.0380515	Up-Hypo
MNDA	-0.49024	0.00132827	1.20193	0.00264321	-0.274431	Up-Hypo
MPEG1	-0.642994	8.11628e-06	1.31291	2.59598e-05	-0.107768	Up-Hypo
MS4A6A	-0.654609	5.00596e-06	1.97001	5.03257e-10	-0.142116	Up-Hypo
MS4A7	-0.462035	0.00266976	1.88294	7.0296e-11	-0.21724	Up-Hypo
MSR1	-0.56405	0.00015141	1.80888	4.52267e-11	-0.0941366	Up-Hypo
MXD3	-0.552349	0.000221784	1.12334	9.4694e-10	-0.04319	Up-Hypo
MXRA8	-0.574045	0.000110531	1.00497	0.00365595	-0.00839191	Up-Hypo
MYO9B	-0.669038	2.59523e-06	1.10256	5.71532e-08	-0.126561	Up-Hypo
N4BP2	-0.726967	1.33114e-07	1.31762	1.2964e-14	-0.0907169	Up-Hypo
NBL1	-0.54404	0.000284907	1.4429	2.80646e-10	-0.0941661	Up-Hypo
NCAPG2	-0.601772	4.14643e-05	1.62772	9.26563e-21	-0.115256	Up-Hypo
NCKAP1L	-0.793175	1.68065e-09	1.79388	7.46195e-09	-0.0867774	Up-Hypo
NFATC4	-0.648617	6.43727e-06	1.50255	1.40757e-19	-0.049928	Up-Hypo
NFIX	-0.726925	1.33114e-07	1.74466	2.51216e-12	-0.135951	Up-Hypo
NID2	-0.673365	2.1219e-06	1.34726	1.46154e-07	-0.148264	Up-Hypo
NLRC4	-0.686932	1.10972e-06	1.84244	1.79831e-05	-0.0744459	Up-Hypo
NME1	-0.458207	0.00294062	1.38329	1.28904e-08	-0.0985308	Up-Hypo
NOD2	-0.541749	0.000303987	1.23113	0.000148823	-0.0855594	Up-Hypo
NR2F2	-0.579183	9.23276e-05	1.05771	4.14589e-08	-0.0613296	Up-Hypo
NRP2	-0.795375	1.43877e-09	2.04721	4.23827e-21	-0.15857	Up-Hypo
NRXN1	-0.543664	0.000288311	3.19843	2.51632e-08	-0.0515685	Up-Hypo
NRXN3	-0.514529	0.000677909	1.57348	1.31796e-10	-0.124578	Up-Hypo
NTM	-0.751137	3.11294e-08	2.61626	2.59462e-19	-0.0828099	Up-Hypo
NXN	-0.475227	0.00195383	1.23442	1.93408e-09	-0.0934907	Up-Hypo
NYNRIN	-0.595909	5.14146e-05	1.07903	7.49602e-07	-0.0150232	Up-Hypo
OSR1	-0.613747	2.63098e-05	2.86877	3.3753e-18	-0.0688296	Up-Hypo
P2RX7	-0.603097	3.94059e-05	1.53009	5.61323e-10	-0.0345386	Up-Hypo
PCBP4	-0.708423	3.7199e-07	1.20703	7.87963e-07	-0.0707599	Up-Hypo
PCDH18	-0.700023	5.75037e-07	1.97875	2.76052e-09	-0.127823	Up-Hypo
PCED1B-AS1	-0.573423	0.000112549	2.37497	1.48355e-08	-0.140235	Up-Hypo
PCOLCE	-0.526631	0.00048198	1.75748	1.44099e-06	-0.144913	Up-Hypo
PGAP1	-0.506851	0.000840551	1.11576	1.04703e-08	-0.105087	Up-Hypo
PGF	-0.592876	5.69572e-05	1.22404	0.000239847	-0.0367371	Up-Hypo
PHLDA1	-0.608037	3.25722e-05	1.12412	1.48898e-05	-0.0612722	Up-Hypo
PHLDA3	-0.680663	1.52517e-06	1.90575	1.16184e-16	-0.0397943	Up-Hypo
PKIA	-0.575946	0.000103176	2.2392	5.11566e-11	-0.134224	Up-Hypo
PKNOX2	-0.691923	8.66249e-07	1.42597	3.13349e-12	-0.0732875	Up-Hypo
PLCB4	-0.723236	1.6164e-07	1.39195	4.77788e-12	-0.0774677	Up-Hypo
PLD4	-0.800819	9.53908e-10	1.86164	2.27075e-07	-0.101245	Up-Hypo
PLEKHO1	-0.72088	1.83946e-07	1.43309	1.84833e-17	-0.128466	Up-Hypo
PLXNC1	-0.469794	0.00222862	2.44556	1.40445e-16	-0.0450819	Up-Hypo
PMP22	-0.52538	0.000498223	1.43195	7.91297e-10	-0.113526	Up-Hypo
POSTN	-0.62479	1.68298e-05	3.66904	1.6243e-21	-0.0990219	Up-Hypo
PRICKLE1	-0.723188	1.6164e-07	1.55901	4.37414e-07	-0.0434261	Up-Hypo
PRIM2	-0.793886	1.62089e-09	1.27456	5.73278e-15	-0.141289	Up-Hypo
PSD3	-0.475626	0.00193768	1.40638	2.49492e-12	-0.00520174	Up-Hypo
PTGDR	-0.608687	3.17808e-05	1.6139	1.21503e-07	-0.158119	Up-Hypo
PTK7	-0.525823	0.000492134	1.26136	6.41554e-12	-0.068613	Up-Hypo
PTPN22	-0.709291	3.56043e-07	1.49485	1.36551e-05	-0.114915	Up-Hypo
PTPN7	-0.711793	3.07345e-07	1.23261	0.00278724	-0.0996468	Up-Hypo
PTTG1	-0.572982	0.000113493	3.67946	6.52392e-26	-0.0442981	Up-Hypo
PURG	-0.464266	0.00254337	2.07644	1.12649e-11	-0.014476	Up-Hypo
PXDN	-0.551252	0.000229465	2.26272	4.18408e-43	-0.0370068	Up-Hypo
PYCARD	-0.568001	0.000132772	1.52773	3.68458e-08	-0.107443	Up-Hypo
PYGM	-0.669017	2.59523e-06	1.31624	0.000320767	-0.0977813	Up-Hypo
PYGO1	-0.590072	6.31406e-05	1.64594	7.08248e-07	-0.181274	Up-Hypo
QSER1	-0.515152	0.000666821	1.007	3.77225e-11	-0.0647508	Up-Hypo
RAB31	-0.525612	0.000495001	1.23251	1.52293e-07	-0.12593	Up-Hypo
RAC2	-0.580554	8.82841e-05	1.20954	0.00197465	-0.0654848	Up-Hypo
RASL12	-0.714309	2.67542e-07	1.1431	0.00132837	-0.0251945	Up-Hypo
RBP1	-0.721895	1.73404e-07	2.75906	1.20288e-45	-0.119512	Up-Hypo
RGMA	-0.575589	0.000104458	2.43333	2.03322e-14	-0.123826	Up-Hypo
RGS10	-0.694363	7.71624e-07	1.96903	1.07501e-16	-0.0673806	Up-Hypo
RGS19	-0.515412	0.000662753	1.13615	6.92586e-05	-0.0477791	Up-Hypo
RGS4	-0.497991	0.00107486	1.95553	5.98031e-06	-0.126941	Up-Hypo
RNASE6	-0.465858	0.00245345	1.53493	5.25153e-06	-0.0293497	Up-Hypo
RNF144A	-0.644532	7.67047e-06	1.32999	1.20475e-10	-0.0473396	Up-Hypo
RNF165	-0.555786	0.00019855	1.33898	9.64112e-07	-0.0234116	Up-Hypo
RNF175	-0.663506	3.37287e-06	5.53881	1.47901e-35	-0.0578956	Up-Hypo
RUNX1	-0.721918	1.73404e-07	1.95379	5.34511e-15	-0.0658109	Up-Hypo
RUNX3	-0.583221	8.10402e-05	1.45026	0.000242121	-0.0375405	Up-Hypo
SACS	-0.49692	0.00110781	2.43984	1.78897e-45	-0.0306375	Up-Hypo
SALL2	-0.584709	7.68627e-05	1.64991	9.48543e-14	-0.0614348	Up-Hypo
SBK1	-0.535811	0.000365487	1.75413	6.51439e-09	-0.0822405	Up-Hypo
SCIMP	-0.765418	1.22153e-08	1.64299	1.36332e-07	-0.0671091	Up-Hypo
SCML4	-0.466306	0.00242808	1.54513	6.8412e-05	-0.03191	Up-Hypo
SDK2	-0.570356	0.000123505	2.48455	1.97294e-22	-0.0091496	Up-Hypo
SELPLG	-0.78113	3.7263e-09	1.34273	0.000337922	-0.118739	Up-Hypo
SERPINF1	-0.656653	4.57427e-06	1.56064	2.66291e-05	-0.151542	Up-Hypo
SGCD	-0.733076	9.39608e-08	3.22166	1.33919e-32	-0.190665	Up-Hypo
SHMT2	-0.643168	8.07842e-06	1.3559	5.58488e-16	-0.0420828	Up-Hypo
SIGLEC9	-0.530351	0.000429497	1.50193	0.00330284	-0.105991	Up-Hypo
SIRPB2	-0.653389	5.26463e-06	1.2765	0.00146167	-0.163815	Up-Hypo
SLC16A1	-0.701736	5.25122e-07	2.14128	1.46385e-16	-0.0751772	Up-Hypo
SLC1A4	-0.559125	0.000178413	1.78676	8.92818e-21	-0.0463609	Up-Hypo
SLC35G2	-0.476203	0.00191573	1.06575	6.52747e-05	-0.00848232	Up-Hypo
SLC43A3	-0.570732	0.000121925	1.47601	8.55909e-12	-0.0684079	Up-Hypo
SLC9A9	-0.678154	1.71102e-06	1.60436	5.871e-11	-0.156272	Up-Hypo
SLC9B2	-0.750025	3.34785e-08	1.6384	2.17568e-12	-0.0387823	Up-Hypo
SLCO5A1	-0.528791	0.000450806	4.11292	3.99725e-29	-0.0237972	Up-Hypo
SNAP25	-0.60775	3.29204e-05	2.3331	1.12159e-08	-0.0468867	Up-Hypo
SNX20	-0.812449	3.74956e-10	1.76835	1.50574e-06	-0.117886	Up-Hypo
SP140	-0.578602	9.41662e-05	1.29822	8.8034e-06	-0.132749	Up-Hypo
SPARC	-0.797101	1.26287e-09	1.7232	2.61528e-13	-0.174782	Up-Hypo
SPARCL1	-0.575184	0.000105949	1.37497	0.000135553	-0.163122	Up-Hypo
SPEG	-0.553714	0.000212008	1.41088	5.10707e-05	-0.0788563	Up-Hypo
SPI1	-0.593147	5.65952e-05	1.17998	0.00216625	-0.118957	Up-Hypo
SPINK5	-0.544376	0.000282635	3.37495	6.89875e-23	-0.0911298	Up-Hypo
SPN	-0.667458	2.79241e-06	1.41366	0.000146078	-0.145493	Up-Hypo
SPRY1	-0.681379	1.46931e-06	1.18778	1.02003e-07	-0.139079	Up-Hypo
SPTB	-0.463783	0.00256738	1.30698	0.00367213	-0.0379417	Up-Hypo
SSPN	-0.632827	1.2288e-05	1.6398	2.76209e-11	-0.0694157	Up-Hypo
ST6GAL2	-0.636998	1.04118e-05	3.6179	1.17614e-50	-0.0756	Up-Hypo
ST6GALNAC5	-0.58176	8.49536e-05	2.89792	4.50163e-12	-0.07102	Up-Hypo
STAC3	-0.572643	0.000114811	1.29251	0.0039609	-0.0530208	Up-Hypo
STAMBPL1	-0.669193	2.59523e-06	1.09042	5.29839e-05	-0.136647	Up-Hypo
STMN1	-0.562451	0.000159577	1.79076	1.47378e-14	-0.0324877	Up-Hypo
SULF1	-0.824769	1.40578e-10	3.47254	6.42278e-24	-0.0854364	Up-Hypo
SV2A	-0.633886	1.18263e-05	2.11891	7.02418e-12	-0.0406199	Up-Hypo
TAF1A	-0.536667	0.000355421	1.15626	4.54549e-11	-0.0597918	Up-Hypo
TBC1D10C	-0.564062	0.00015141	1.60633	1.08929e-06	-0.172238	Up-Hypo
TBXAS1	-0.623863	1.74898e-05	1.05348	1.1685e-06	-0.0772323	Up-Hypo
TCF3	-0.673211	2.13423e-06	1.07459	1.19284e-10	-0.0402647	Up-Hypo
TCF4	-0.839394	3.91189e-11	2.00758	2.32005e-26	-0.144571	Up-Hypo
TEAD2	-0.610732	2.95743e-05	1.10775	1.41166e-05	-0.140305	Up-Hypo
TESPA1	-0.639214	9.5188e-06	1.82369	0.00104007	-0.0996625	Up-Hypo
TET1	-0.472596	0.0020833	1.84208	8.1868e-23	-0.132141	Up-Hypo
TGFB3	-0.593037	5.66726e-05	1.35493	2.48405e-06	-0.0581615	Up-Hypo
TGFBI	-0.582035	8.42886e-05	1.0134	0.00166931	-0.0332518	Up-Hypo
TLR6	-0.619485	2.08094e-05	1.35874	6.45932e-06	-0.130046	Up-Hypo
TLR9	-0.642085	8.4436e-06	1.29187	1.50987e-05	-0.141681	Up-Hypo
TMEM100	-0.582493	8.31531e-05	2.76863	2.86339e-09	-0.127851	Up-Hypo
TMEM108	-0.724685	1.4956e-07	3.01866	4.17258e-13	-0.103753	Up-Hypo
TMEM154	-0.470193	0.00220619	1.35378	5.77588e-06	-0.050546	Up-Hypo
TNFAIP6	-0.472005	0.00211592	3.67553	8.99853e-14	-0.163006	Up-Hypo
TNFRSF19	-0.646135	7.1672e-06	1.7394	2.66289e-09	-0.0684757	Up-Hypo
TNFSF13B	-0.640419	9.07566e-06	1.29654	9.49405e-05	-0.0970531	Up-Hypo
TRAF3IP3	-0.774132	6.28067e-09	1.01564	0.0135756	-0.117636	Up-Hypo
TRIP13	-0.470685	0.0021825	1.39954	3.06334e-13	-0.139359	Up-Hypo
TTC39C	-0.5378	0.000344007	1.52929	1.21061e-16	-0.0487017	Up-Hypo
TXLNB	-0.725775	1.40934e-07	3.27621	5.04738e-13	-0.152045	Up-Hypo
USP49	-0.725632	1.41721e-07	1.02755	8.72091e-07	-0.0715958	Up-Hypo
VANGL2	-0.643257	8.07693e-06	1.56404	1.22394e-19	-0.065438	Up-Hypo
VCAN	-0.571937	0.00011778	2.89909	2.02526e-16	-0.0645716	Up-Hypo
VIM	-0.505138	0.000879716	1.50669	1.16289e-10	-0.0696145	Up-Hypo
VRK1	-0.522893	0.000534941	1.1012	3.23214e-08	-0.0922618	Up-Hypo
VWF	-0.546245	0.000268408	1.52165	2.09299e-09	-0.0646683	Up-Hypo
WIPF1	-0.696993	6.74501e-07	1.02128	1.89788e-07	-0.0553584	Up-Hypo
WNT5B	-0.75343	2.68965e-08	2.37624	1.8539e-26	-0.10257	Up-Hypo
XKR5	-0.715427	2.50845e-07	4.03927	1.40193e-18	-0.0581053	Up-Hypo
ZAP70	-0.488775	0.00138399	1.23994	0.00189883	-0.0553275	Up-Hypo
ZBTB7C	-0.596436	5.03886e-05	1.22226	0.000355255	-0.108799	Up-Hypo
ZNF280B	-0.669148	2.59523e-06	2.52256	2.33814e-19	-0.0450201	Up-Hypo
ZNF423	-0.685244	1.20809e-06	2.11884	8.70261e-18	-0.0835394	Up-Hypo
ZNF474	-0.475879	0.00192954	1.40097	0.00301313	-0.0575337	Up-Hypo
ZNF521	-0.637022	1.04118e-05	2.45024	1.77225e-24	-0.108907	Up-Hypo
