# Supplementary material for: Novel epigenetic signature, molecular subtypes and insights into IGF2/H19 dysregulation in Wilms tumour revealed by methylomic and transcriptomic profiling
Source: Research Square preprint supplement (doi:10.21203/rs.3.rs-8030860/v1), 2025-11-11
Supplement: Supplementary file 4 [file 42e0336bbf9fcb173a0d4900.xlsx]

## Sheet: Table S4_Statistic analyses
# Segregation trends with DMSs
## Hypothesis Driven (Based on clustering in heatmap)
## Regressive
Permutation test for adonis under reduced model
Permutation: free
Number of permutations: 1000
adonis2(formula = dist_matrix_EpiSig ~ myPD$Histology_binary[28:54], data = myPD[28:54, ], permutations = 1000) # Model includes only tumor samples
Df SumOfSqs R2 F Pr(>F)
Model 1 1118.7 0.11109 3.1242 0.005994 **	p-Adj = 0.011988
Residual 25 8952.2 0.88891
Total 26 10071.0 1.00000
---
Signif. codes: 0 '***' 0.001 '**' 0.01 '*' 0.05 '.' 0.1 ' ' 1
To check the differernce in within-group dispersion
Analysis of Variance Table
Response: Distances
Df Sum Sq Mean Sq F value Pr(>F)
Groups 1 40.65 40.652 1.0835 0.3079
Residuals 25 937.94 37.518 1
## Epithelial
dist_matrix <- dist(t(sign[,28:54]), method = "euclidean")
myPD$Histology_binary <- ifelse(myPD$Histology == "Epithelial", "Epithelial", "Other")
adonis2(dist_matrix ~ myPD$Histology_binary[28:54],
data = myPD[28:54,],
permutations = 1000)
Permutation test for adonis under reduced model
Permutation: free
Number of permutations: 1000
adonis2(formula = dist_matrix ~ myPD$Histology_binary[28:54], data = myPD[28:54, ], permutations = 1000)
Df SumOfSqs R2 F Pr(>F)
Model 1 815.9 0.08102 2.2039 0.02897 *	p-Adj = 0.028970
Residual 25 9255.1 0.91898
Total 26 10071.0 1.00000
---
Signif. codes: 0 '***' 0.001 '**' 0.01 '*' 0.05 '.' 0.1 ' ' 1
beta_disp <- betadisper(dist_matrix, myPD$Histology_binary[28:54])
anova(beta_disp)
Analysis of Variance Table
Response: Distances
Df Sum Sq Mean Sq F value Pr(>F)
Groups 1 0.21 0.215 0.0068 0.9352
Residuals 25 794.23 31.769
Groups 1 0.21 0.215 0.0068 0.9352
Residuals 25 794.23 31.769
## Exploratory
## Blastemal
dist_matrix <- dist(t(sign[,28:54]), method = "euclidean")
myPD$Histology_binary <- ifelse(myPD$Histology == "Blastemal", "Blastemal", "Other")
adonis2(dist_matrix ~ myPD$Histology_binary[28:54],
data = myPD[28:54,],
permutations = 1000)
Permutation test for adonis under reduced model
Permutation: free
Number of permutations: 1000
adonis2(formula = dist_matrix ~ myPD$Histology_binary[28:54], data = myPD[28:54, ], permutations = 1000)
Df SumOfSqs R2 F Pr(>F)
Model 1 409.6 0.04067 1.0599 0.3317
Residual 25 9661.4 0.95933
Total 26 10071.0 1.00000
beta_disp <- betadisper(dist_matrix, myPD$Histology_binary[28:54])
anova(beta_disp)
Analysis of Variance Table
Response: Distances
Df Sum Sq Mean Sq F value Pr(>F)
Groups 1 27.98 27.980 1.1126 0.3016
Residuals 25 628.72 25.149
## Stromal
dist_matrix <- dist(t(sign[,28:54]), method = "euclidean")
myPD$Histology_binary <- ifelse(myPD$Histology == "Stromal", "Stromal", "Other")
adonis2(dist_matrix ~ myPD$Histology_binary[28:54],
data = myPD[28:54,],
permutations = 1000)
Permutation test for adonis under reduced model
Permutation: free
Number of permutations: 1000
adonis2(formula = dist_matrix ~ myPD$Histology_binary[28:54], data = myPD[28:54, ], permutations = 1000)
Df SumOfSqs R2 F Pr(>F)
Model 1 848.9 0.08429 2.3013 0.02298 *	* This significant p-value is possible a false positive as the Stromal samples do not appear to be in cluster in Fig. 1B
Residual 25 9222.1 0.91571
Total 26 10071.0 1.00000
---
Signif. codes: 0 '***' 0.001 '**' 0.01 '*' 0.05 '.' 0.1 ' ' 1
beta_disp <- betadisper(dist_matrix, myPD$Histology_binary[28:54])
anova(beta_disp)
Analysis of Variance Table
Response: Distances
Df Sum Sq Mean Sq F value Pr(>F)
Groups 1 102.27 102.270 3.2741 0.08242 .	* Betadisper analysis shows borderline significance (p=0.082) for dispersion homogeneity, suggesting the PERMANOVA result may reflect differences in within-group variance rather than true separation of group centroids
Residuals 25 780.89 31.236
---
Signif. codes: 0 '***' 0.001 '**' 0.01 '*' 0.05 '.' 0.1 ' ' 1
# Segregation trends with DMSs in promoters from genes in Pathways in cancer
## Hypothesis Driven (Based on clustering in heatmap)
## Epithelial
adonis2(formula = dist_matrix ~ myPD$Histology_binary[28:54], data = myPD[28:54, ], permutations = 1000)
Df SumOfSqs R2 F Pr(>F)
Model 1 3.189 0.09805 2.7176 0.01598 *	p-Adj = 0.015980
Residual 25 29.339 0.90195
Total 26 32.528 1.00000
---
Signif. codes: 0 '***' 0.001 '**' 0.01 '*' 0.05 '.' 0.1 ' ' 1
> beta_disp <- betadisper(dist_matrix, myPD$Histology_binary[28:54])
> anova(beta_disp)
Analysis of Variance Table
Response: Distances
Df Sum Sq Mean Sq F value Pr(>F)
Groups 1 0.00064 0.000642 0.0054 0.942
Residuals 25 2.96814 0.118725
## Regressive
Permutation test for adonis under reduced model
Permutation: free
Number of permutations: 1000
adonis2(formula = dist_matrix_CancerGenes ~ myPD$Histology_binary[28:54], data = myPD[28:54, ], permutations = 1000) # Model includes only tumor samples
Df SumOfSqs R2 F Pr(>F)
Model 1 3.386 0.10409 2.9045 0.003996 **	p-Adj = 0.007992
Residual 25 29.142 0.89591
Total 26 32.528 1.00000
---
Signif. codes: 0 '***' 0.001 '**' 0.01 '*' 0.05 '.' 0.1 ' ' 1
To check the differernce in within-group dispersion
Analysis of Variance Table
Response: Distances
Df Sum Sq Mean Sq F value Pr(>F)
Groups 1 0.1201 0.12010 0.9185 0.347
Residuals 25 3.2689 0.13076
## Exploratory
## Blastemal
Permutation test for adonis under reduced model
Permutation: free
Number of permutations: 1000
adonis2(formula = dist_matrix ~ myPD$Histology_binary[28:54], data = myPD[28:54, ], permutations = 1000)
Df SumOfSqs R2 F Pr(>F)
Model 1 1.513 0.04651 1.2194 0.2547
Residual 25 31.015 0.95349
Total 26 32.528 1.00000
Analysis of Variance Table
Response: Distances
Df Sum Sq Mean Sq F value Pr(>F)
Groups 1 0.08629 0.086291 0.8303 0.3709
Residuals 25 2.59809 0.103923
## Stromal
Permutation test for adonis under reduced model
Permutation: free
Number of permutations: 1000
adonis2(formula = dist_matrix ~ myPD$Histology_binary[28:54], data = myPD[28:54, ], permutations = 1000)
Df SumOfSqs R2 F Pr(>F)
Model 1 2.288 0.07035 1.8917 0.07093 .
Residual 25 30.240 0.92965
Total 26 32.528 1.00000
---
Signif. codes: 0 '***' 0.001 '**' 0.01 '*' 0.05 '.' 0.1 ' ' 1
Analysis of Variance Table
Response: Distances
Df Sum Sq Mean Sq F value Pr(>F)
Groups 1 0.2403 0.24032 1.8611 0.1847
Residuals 25 3.2282 0.12913
# Segregation trends with top 5,000 variable CpGs in WT
## Hypothesis Driven (Based on clustering in heatmap)
Epithelial
Permutation test for adonis under reduced model
Permutation: free
Number of permutations: 1000
adonis2(formula = dist_matrix ~ myPD$Histology_binary[28:54], data = myPD[28:54, ], permutations = 1000)
Df SumOfSqs R2 F Pr(>F)
Model 1 766.8 0.07353 1.984 0.04795 *	p-Adj = 0.04795
Residual 25 9662.3 0.92647
Total 26 10429.1 1.00000
---
Signif. codes: 0 '***' 0.001 '**' 0.01 '*' 0.05 '.' 0.1 ' ' 1
Analysis of Variance Table
Response: Distances
Df Sum Sq Mean Sq F value Pr(>F)
Groups 1 1.49 1.493 0.0324 0.8586
Residuals 25 1151.73 46.069
Regressive
Permutation test for adonis under reduced model
Permutation: free
Number of permutations: 1000
adonis2(formula = dist_matrix ~ myPD$Histology_binary[28:54], data = myPD[28:54, ], permutations = 1000)
Df SumOfSqs R2 F Pr(>F)
Model 1 947.7 0.09087 2.499 0.01898 *	p-Adj = 0.03796
Residual 25 9481.4 0.90913
Total 26 10429.1 1.00000
---
Signif. codes: 0 '***' 0.001 '**' 0.01 '*' 0.05 '.' 0.1 ' ' 1
Analysis of Variance Table
Response: Distances
Df Sum Sq Mean Sq F value Pr(>F)
Groups 1 133.69 133.688 3.0934 0.09085 .
Residuals 25 1080.43 43.217
---
Signif. codes: 0 '***' 0.001 '**' 0.01 '*' 0.05 '.' 0.1 ' ' 1
## Exploratory
Blastemal
Permutation test for adonis under reduced model
Permutation: free
Number of permutations: 1000
adonis2(formula = dist_matrix ~ myPD$Histology_binary[28:54], data = myPD[28:54, ], permutations = 1000)
Df SumOfSqs R2 F Pr(>F)
Model 1 479.1 0.04593 1.2036 0.2468
Residual 25 9950.1 0.95407
Total 26 10429.1 1.00000
Analysis of Variance Table
Response: Distances
Df Sum Sq Mean Sq F value Pr(>F)
Groups 1 29.39 29.390 0.8693 0.3601
Residuals 25 845.22 33.809
Stromal
Permutation test for adonis under reduced model
Permutation: free
Number of permutations: 1000
adonis2(formula = dist_matrix ~ myPD$Histology_binary[28:54], data = myPD[28:54, ], permutations = 1000)
Df SumOfSqs R2 F Pr(>F)
Model 1 927.9 0.08897 2.4415 0.02098 *
Residual 25 9501.2 0.91103
Total 26 10429.1 1.00000
---
Signif. codes: 0 '***' 0.001 '**' 0.01 '*' 0.05 '.' 0.1 ' ' 1
Analysis of Variance Table
Response: Distances
Df Sum Sq Mean Sq F value Pr(>F)
Groups 1 59.63 59.635 1.5377 0.2265
Residuals 25 969.57 38.783
## Association test between 11p15.5 molecular groups and clinical features
Phenotype	p_Value	p-adj
MethCluster	0.0492741	0.1478223
Histology	0.300024	0.4500363
Stages	0.782241	0.7822406
## For Regressive hystology in norm11p15.5 subgroup (Fig. 2D):
Contengency table
OtherHistolohy Regressive
norm11p15.5 2 4
OtherMolGroup 17 4
Fisher's Exact Test for Count Data
data: contingency_table
p-value = 0.04413
alternative hypothesis: two.sided
# Segregation trends with DEGs
## Hypothesis Driven (Based on clustering in heatmap)
## Epithelial
>
dist_matrix <- dist(t(DEG.exp[,24:45]), method = "euclidean")
myPD.exp$Histology_binary <- ifelse(myPD.exp$Histology == "Epithelial", "Epithelial", "Other")
>
adonis2(dist_matrix ~ myPD.exp$Histology_binary[24:45],
data = myPD.exp[24:45,],
permutations = 1000)
Permutation test for adonis under reduced model
Permutation: free
Number of permutations: 1000
adonis2(formula = dist_matrix ~ myPD.exp$Histology_binary[24:45], data = myPD.exp[24:45, ], permutations = 1000)
Df SumOfSqs R2 F Pr(>F)
Model 1 5524 0.07508 1.6236 0.03696 *	p-Adj = 0.03696
Residual 20 68045 0.92492
Total 21 73569 1.00000
---
Signif. codes: 0 '***' 0.001 '**' 0.01 '*' 0.05 '.' 0.1 ' ' 1
>
beta_disp <- betadisper(dist_matrix, myPD.exp$Histology_binary[24:45])
anova(beta_disp)
Analysis of Variance Table
Response: Distances
Df Sum Sq Mean Sq F value Pr(>F)
Groups 1 85.5 85.532 0.5089 0.4839
Residuals 20 3361.8 168.089
## Regressive
>
dist_matrix <- dist(t(DEG.exp[,24:45]), method = "euclidean")
myPD.exp$Histology_binary <- ifelse(myPD.exp$Histology == "Regressive", "Regressive", "Other")
>
adonis2(dist_matrix ~ myPD.exp$Histology_binary[24:45],
data = myPD.exp[24:45,],
permutations = 1000)
Permutation test for adonis under reduced model
Permutation: free
Number of permutations: 1000
adonis2(formula = dist_matrix ~ myPD.exp$Histology_binary[24:45], data = myPD.exp[24:45, ], permutations = 1000)
Df SumOfSqs R2 F Pr(>F)
Model 1 5816 0.07905 1.7168 0.02797 *	p-Adj = 0.03696
Residual 20 67753 0.92095
Total 21 73569 1.00000
---
Signif. codes: 0 '***' 0.001 '**' 0.01 '*' 0.05 '.' 0.1 ' ' 1
>
beta_disp <- betadisper(dist_matrix, myPD.exp$Histology_binary[24:45])
anova(beta_disp)
Analysis of Variance Table
Response: Distances
Df Sum Sq Mean Sq F value Pr(>F)
Groups 1 29.3 29.331 0.1733 0.6816
Residuals 20 3385.3 169.266
## Exploratory
## Blastemal
>
dist_matrix <- dist(t(DEG.exp[,24:45]), method = "euclidean")
myPD.exp$Histology_binary <- ifelse(myPD.exp$Histology == "Blastemal", "Blastemal", "Other")
>
adonis2(dist_matrix ~ myPD.exp$Histology_binary[24:45],
data = myPD.exp[24:45,],
permutations = 1000)
Permutation test for adonis under reduced model
Permutation: free
Number of permutations: 1000
adonis2(formula = dist_matrix ~ myPD.exp$Histology_binary[24:45], data = myPD.exp[24:45, ], permutations = 1000)
Df SumOfSqs R2 F Pr(>F)
Model 1 3425 0.04655 0.9764 0.4575
Residual 20 70144 0.95345
Total 21 73569 1.00000
>
beta_disp <- betadisper(dist_matrix, myPD.exp$Histology_binary[24:45])
anova(beta_disp)
Analysis of Variance Table
Response: Distances
Df Sum Sq Mean Sq F value Pr(>F)
Groups 1 505.48 505.48 3.3669 0.08144 .
Residuals 20 3002.68 150.13
---
Signif. codes: 0 '***' 0.001 '**' 0.01 '*' 0.05 '.' 0.1 ' ' 1
>
## Stromal
>
dist_matrix <- dist(t(DEG.exp[,24:45]), method = "euclidean")
myPD.exp$Histology_binary <- ifelse(myPD.exp$Histology == "Stromal", "Stromal", "Other")
>
adonis2(dist_matrix ~ myPD.exp$Histology_binary[24:45],
data = myPD.exp[24:45,],
permutations = 1000)
Permutation test for adonis under reduced model
Permutation: free
Number of permutations: 1000
adonis2(formula = dist_matrix ~ myPD.exp$Histology_binary[24:45], data = myPD.exp[24:45, ], permutations = 1000)
Df SumOfSqs R2 F Pr(>F)
Model 1 4962 0.06744 1.4464 0.07692 .
Residual 20 68608 0.93256
Total 21 73569 1.00000
---
Signif. codes: 0 '***' 0.001 '**' 0.01 '*' 0.05 '.' 0.1 ' ' 1
>
beta_disp <- betadisper(dist_matrix, myPD.exp$Histology_binary[24:45])
anova(beta_disp)
Analysis of Variance Table
Response: Distances
Df Sum Sq Mean Sq F value Pr(>F)
Groups 1 1191.5 1191.47 8.1836 0.009664 **
Residuals 20 2911.9 145.59
---
Signif. codes: 0 '***' 0.001 '**' 0.01 '*' 0.05 '.' 0.1 ' ' 1
>
# Association of WT Subtype and clinical features
## Fisher's Exact Test
Phenotype	p_Value	p-adj
MethCluster	0.0091147	0.02296125
Histology	0.0091845	0.02296125
Stages	0.192724	0.24090562
MolGroup	1	1
ChemoResponse	0.158247	0.24090562
# Quantile Regression for IGF2 regulation (Fig. S4c)
tau	coef	lower	upper	Sample	Predictor
0.1	25.4418	19.8179	32.8533	WT	IC1
0.3	17.3196	0.55931	24.6032	WT	IC1
0.5	3.68634	-2.56245	10.1609	WT	IC1
0.7	1.24269	-3.3081	5.8146	WT	IC1
0.9	-2.10893	-10.8964	7.13144	WT	IC1
0.1	-21.4884	-43.3117	23.7095	WT	DMR0
0.3	-8.61232	-17.1349	-7.15449	WT	DMR0
0.5	-8.35486	-13.3985	-3.67327	WT	DMR0
0.7	-9.97411	-17.5763	-4.38734	WT	DMR0
0.9	-14.9527	-24.0455	-3.21935	WT	DMR0
0.1	8.33023	-20.5679	13.8619	WT	P0
0.3	-5.60383	-8.588	5.59741	WT	P0
0.5	-3.3113	-7.79818	-2.15047	WT	P0
0.7	-5.58526	-7.30742	-0.796042	WT	P0
0.9	-4.12598	-16.81	5.14911	WT	P0
0.1	10.0264	-48.2189	12.3019	WT	P2
0.3	-0.791255	-24.433	14.5243	WT	P2
0.5	-2.66403	-6.56838	2.65705	WT	P2
0.7	-3.62316	-4.30478	0.993544	WT	P2
0.9	-1.39646	-4.65603	6.77447	WT	P2
0.1	-166.329	-597.57	-73.7931	WT	P3
0.3	-124.688	-196.848	33.3227	WT	P3
0.5	-82.6746	-134.029	53.4715	WT	P3
0.7	-24.4807	-120.389	77.1849	WT	P3
0.9	49.8201	-35.8401	96.881	WT	P3
0.1	335.671	-933.655	417.031	WT	P4
0.3	-154.371	-303.08	20.7154	WT	P4
0.5	-52.3917	-232.524	-12.8033	WT	P4
0.7	-56.9643	-124.358	-27.456	WT	P4
0.9	-91.981	-135.357	759.152	WT	P4
## Linear regression model for PLAG1 and BAHD1 effect on IGF2 expression
Term	Estimate	Std. Error	t value	p-value	Significance
(Intercept)	14.2513	3.2334	4.407	7.1e-05	***
PLAG1	0.6282	0.2051	3.063	0.00382	**
BAHD1	-1.7901	0.5619	-3.186	0.00272	**
Residual standard error: 1.325 on 42 degrees of freedom
Multiple R-squared: 0.3279, Adjusted R-squared: 0.2959
F-statistic: 10.25 on 2 and 42 DF, p-value: 0.0002376
## Correlation Between IGF2 and BAHD1 Stratified by PLAG1 Expression
Group	Pearson Correlation	t-statistic	df	p-value	95% CI	Significance
High PLAG1	-0.309676	-1.6923	27	0.1021	[-0.607, 0.064]	ns
Low PLAG1	-0.513405	-2.3171	15	0.03505	[-0.797, -0.043]	*
## Ordinal Regression for analayse IGF2 and H19 expression in WT progression (Fig….)
IGF2 – Stages
polr(formula = Stage ~ Expression data = Exp.data.long[Exp.data.long$GeneName == IGF2 ] , Hess = TRUE)
Coefficients:
Value Std. Error t value
Expression 1.2 0.2821 4.254
Intercepts:
Value Std. Error t value
NNK|I_II 13.5980 3.2233 4.2186
I_II|III 17.1846 3.8737 4.4362
Residual Deviance: 51.70957
AIC: 57.70957
H19 – Stages
polr(formula = Stage ~ Expression, data = Exp.data.long[Exp.data.long$GeneName == "H19", ], Hess = TRUE)
Coefficients:
Value Std. Error t value
Expression -0.3008 0.1099 -2.738
Intercepts:
Value Std. Error t value
NNK|I_II -2.5409 0.9803 -2.5919
I_II|III -0.6057 0.8931 -0.6781
Residual Deviance: 81.30191
AIC: 87.30191
T-values were converted to p-values using code: “2 * pt(-abs(t_value), df)”
