# Supplementary material for: Novel epigenetic signature, molecular subtypes and insights into IGF2/H19 dysregulation in Wilms tumour revealed by methylomic and transcriptomic profiling
Source: Research Square preprint supplement (doi:10.21203/rs.3.rs-8030860/v1), 2025-11-11
Supplement: Supplementary file 5 [file 6ba2c6455c7fdd660f036011.xlsx]

## Sheet: Table S6_DEGs
	baseMean	log2FoldChange	lfcSE	stat	pvalue	padj
ATP6V1C2	205.444	-5.07541	0.180106	-28.1802	1.02334e-174	1.80272e-170
HSD11B2	1263.36	-5.60309	0.202138	-27.7192	4.10226e-169	3.61327e-165
UMOD	10335.8	-11.3178	0.436844	-25.9081	5.39764e-148	3.16949e-144
MST1L	868.267	-6.91787	0.268119	-25.8015	8.53907e-147	3.7606e-143
AQP2	4887.31	-10.2335	0.398505	-25.6798	1.96427e-145	6.92052e-142
SLC12A1	12933	-9.46457	0.376324	-25.1501	1.41071e-139	4.14183e-136
EGF	4034.53	-8.19523	0.336081	-24.3847	2.485e-131	6.25367e-128
SLC22A8	617	-9.13889	0.382047	-23.9209	1.85775e-126	4.09077e-123
DMGDH	378.356	-3.82843	0.168721	-22.6909	5.50615e-114	1.07774e-110
SLC4A9	568.689	-8.90586	0.3939	-22.6095	3.49685e-113	6.16006e-110
GP2	731.956	-9.56215	0.425751	-22.4595	1.03311e-111	1.65447e-108
SLC6A19	1093.42	-9.58484	0.42928	-22.3277	1.98887e-110	2.91966e-107
MIOX	1452.91	-10.0248	0.453742	-22.0936	3.64122e-108	4.93413e-105
KNG1	2631.56	-10.3473	0.468678	-22.0776	5.18461e-108	6.52372e-105
RP11-690G19.4	303.222	-9.62668	0.436311	-22.0638	7.03719e-108	8.26447e-105
BHMT2	710.556	-6.4309	0.293808	-21.8881	3.3744e-106	3.71521e-103
SLC9A3	731.333	-7.73072	0.357436	-21.6282	9.74127e-104	1.00942e-100
PBLD	619.956	-3.36657	0.156658	-21.49	1.93293e-102	1.89169e-99
MFSD4	1041	-5.71335	0.267411	-21.3654	2.8045e-101	2.60021e-98
HAO2	449.756	-6.8006	0.318957	-21.3214	7.18885e-101	6.33194e-98
SLC12A3	2309.96	-8.49014	0.401854	-21.1274	4.45193e-99	3.73453e-96
CYP4A11	929.911	-9.44434	0.451495	-20.9179	3.67596e-97	2.94344e-94
ALDOB	5550.58	-10.3028	0.493	-20.8981	5.57003e-97	4.26616e-94
CLCNKB	762.733	-8.37882	0.403283	-20.7766	7.05437e-96	5.17791e-93
INPP5J	215.244	-4.38607	0.211319	-20.7557	1.08876e-95	7.67186e-93
UPB1	303.178	-5.25596	0.253447	-20.7379	1.57574e-95	1.06762e-92
ACSM2B	1383.84	-8.4977	0.412957	-20.5777	4.34923e-94	2.83763e-91
SLC22A2	436.4	-7.64358	0.375028	-20.3814	2.44658e-92	1.53925e-89
CTD-2228K2.5	472.267	-3.67129	0.180207	-20.3726	2.92634e-92	1.7776e-89
CALB1	775.311	-9.15816	0.456467	-20.0631	1.55037e-89	9.1038e-87
DEFB1	872	-8.34591	0.416906	-20.0187	3.78446e-89	2.15055e-86
RHCG	284.356	-9.10813	0.458012	-19.8862	5.35432e-88	2.94756e-85
HGD	284.022	-5.42481	0.273581	-19.8289	1.67582e-87	8.94581e-85
CTB-27N1.1	432.133	-9.23758	0.468131	-19.7329	1.12522e-86	5.82999e-84
LINC00982	1127	-8.45631	0.428704	-19.7253	1.30818e-86	6.58428e-84
CUBN	6336.76	-5.07103	0.259133	-19.5692	2.82921e-85	1.38443e-82
AGMAT	271.867	-6.84877	0.351724	-19.472	1.89609e-84	9.02743e-82
USP2	583.222	-4.7487	0.24438	-19.4316	4.16855e-84	1.93245e-81
CYP4F3	426.289	-8.06413	0.423393	-19.0464	7.03372e-81	3.17708e-78
PDZK1	363.978	-6.1145	0.323906	-18.8774	1.75028e-79	7.70824e-77
SLC13A1	487.489	-8.12335	0.431039	-18.846	3.17186e-79	1.36282e-76
BHMT	1209.24	-7.78563	0.415047	-18.7584	1.65246e-78	6.93088e-76
SLC22A11	386.556	-7.74564	0.418127	-18.5246	1.30727e-76	5.35557e-74
GLYATL1	553.689	-6.63917	0.359223	-18.482	2.88221e-76	1.15393e-73
CLCNKA	1138.16	-8.38114	0.453757	-18.4706	3.56335e-76	1.39493e-73
WNK4	483.933	-5.70486	0.309305	-18.4441	5.81288e-76	2.22608e-73
LDHD	118.911	-5.16665	0.282576	-18.2841	1.10752e-74	4.15109e-72
SERPINA5	318.578	-6.97033	0.382454	-18.2253	3.25044e-74	1.19291e-71
ANKS4B	87	-7.89079	0.433452	-18.2045	4.75189e-74	1.70835e-71
G6PC	343.422	-9.57396	0.528138	-18.1278	1.92471e-73	6.78114e-71
FUT6	458.489	-8.08587	0.446415	-18.1129	2.52055e-73	8.70629e-71
AMN	341.067	-6.5544	0.36385	-18.014	1.51226e-72	5.12308e-70
SLC34A1	1379.2	-10.7685	0.599877	-17.9511	4.70408e-72	1.56353e-69
TMEM27	216.822	-5.19025	0.291775	-17.7886	8.66725e-71	2.82745e-68
SCNN1G	844.133	-7.03425	0.396261	-17.7516	1.67621e-70	5.36875e-68
PAH	1481.27	-9.61272	0.541789	-17.7425	1.96828e-70	6.19165e-68
HPD	252.867	-7.4659	0.421531	-17.7114	3.42583e-70	1.05876e-67
GBA3	249.822	-6.9623	0.393397	-17.6979	4.35043e-70	1.32133e-67
RASD1	908.711	-4.95287	0.28059	-17.6516	9.88497e-70	2.95142e-67
ACSM2A	1638.29	-8.72589	0.495406	-17.6136	1.93675e-69	5.6863e-67
CYP4A22	102.133	-6.91456	0.394795	-17.5143	1.11415e-68	3.21753e-66
GIPC2	204.556	-4.40741	0.251854	-17.4999	1.43543e-68	4.01622e-66
KCNJ1	862.622	-7.77499	0.444289	-17.4999	1.43632e-68	4.01622e-66
SLCO4C1	507.622	-5.66793	0.324211	-17.4823	1.95612e-68	5.38421e-66
TMEM174	119.933	-8.17708	0.467829	-17.4788	2.07897e-68	5.63432e-66
MMP16	680.444	5.0535	0.289236	17.4719	2.34641e-68	6.26279e-66
ALDH4A1	214.022	-4.36907	0.250295	-17.4557	3.11566e-68	8.19185e-66
AZGP1	221.689	-8.17902	0.472643	-17.3048	4.32483e-67	1.12038e-64
AQP1	1786.13	-4.31076	0.24974	-17.261	9.2451e-67	2.36031e-64
KL	1167.11	-5.54964	0.322346	-17.2164	2.00106e-66	5.03581e-64
SLC22A7	165.422	-8.63363	0.502184	-17.1922	3.03968e-66	7.54184e-64
IYD	206.311	-6.45969	0.376281	-17.1672	4.67596e-66	1.14405e-63
CA12	3362.44	-5.00169	0.29216	-17.1197	1.05818e-65	2.55355e-63
EFHD1	640.067	-3.925	0.229653	-17.091	1.73134e-65	4.12152e-63
SLC16A12	775.4	-5.74078	0.337043	-17.0328	4.69388e-65	1.1025e-62
GLYAT	467.022	-7.30576	0.429036	-17.0283	5.06294e-65	1.17354e-62
MST1P2	194	-4.17324	0.247092	-16.8894	5.38353e-64	1.23164e-61
TMEM213	1082.49	-8.79499	0.522219	-16.8416	1.20969e-63	2.73204e-61
FAM151A	236.378	-7.98426	0.475586	-16.7883	2.97461e-63	6.63301e-61
CRYL1	433.489	-3.15943	0.188581	-16.7537	5.32203e-63	1.17191e-60
FN3K	244.622	-3.19361	0.191159	-16.7065	1.17441e-62	2.55413e-60
PCK1	2963.24	-8.06773	0.483603	-16.6826	1.75528e-62	3.77086e-60
CYFIP2	4227.31	-3.60449	0.217095	-16.6033	6.59949e-62	1.40068e-59
SLC5A12	1403.69	-7.09879	0.431388	-16.4557	7.63161e-61	1.60046e-58
FOXI1	131	-9.01651	0.548228	-16.4466	8.86664e-61	1.83758e-58
ALDH6A1	1627.09	-3.19107	0.194397	-16.4153	1.4876e-60	3.04715e-58
SLC47A2	138.467	-6.5832	0.40129	-16.4051	1.75879e-60	3.56125e-58
TMPRSS2	483.267	-6.23054	0.380712	-16.3655	3.37145e-60	6.74904e-58
ALDH1L1	532.867	-6.50993	0.398558	-16.3337	5.6834e-60	1.12493e-57
CA2	361.067	-4.6932	0.287373	-16.3314	5.90278e-60	1.15537e-57
PLG	754.756	-9.14667	0.561029	-16.3034	9.33527e-60	1.80714e-57
CPXM1	602.8	3.05616	0.187925	16.2626	1.81735e-59	3.47982e-57
CEACAM1	286.933	-4.0296	0.248	-16.2484	2.29249e-59	4.34242e-57
FKBP10	217.622	2.70903	0.166808	16.2404	2.61351e-59	4.89782e-57
AGPAT9	590.089	-4.55834	0.283032	-16.1054	2.33822e-58	4.3358e-56
AQP3	756.689	-5.50343	0.342582	-16.0645	4.52222e-58	8.29828e-56
VASH2	352.178	4.86668	0.303385	16.0413	6.57872e-58	1.19475e-55
WDR72	1397.47	-6.66516	0.417783	-15.9536	2.68738e-57	4.83071e-55
PAQR5	675.2	-6.10809	0.382982	-15.9488	2.90566e-57	5.17032e-55
FXYD2	335.933	-4.24688	0.267554	-15.873	9.74621e-57	1.71689e-54
ACE2	220.889	-5.83396	0.36798	-15.854	1.31855e-56	2.29976e-54
ATP6V0A4	1022.07	-8.81924	0.557451	-15.8207	2.2412e-56	3.87068e-54
PTGFRN	632.956	2.27986	0.144437	15.7845	3.98084e-56	6.80839e-54
SLC6A12	410.311	-4.67494	0.296253	-15.7803	4.25405e-56	7.20571e-54
F11	337.467	-7.19492	0.455998	-15.7784	4.38158e-56	7.35104e-54
SLC36A2	669.644	-9.26692	0.587494	-15.7737	4.72364e-56	7.85015e-54
CDHR5	348.956	-5.41594	0.343652	-15.76	5.86575e-56	9.65711e-54
KIF1A	254.511	5.59375	0.355362	15.741	7.91781e-56	1.29148e-53
ECHDC3	92.0889	-3.07796	0.195798	-15.7201	1.10138e-55	1.77999e-53
SLC39A5	215.911	-6.72254	0.429948	-15.6357	4.15756e-55	6.65815e-53
CCDC64	899.133	-4.56484	0.292044	-15.6306	4.50227e-55	7.14523e-53
CRHBP	96.9111	-3.80414	0.245415	-15.5008	3.42337e-54	5.38446e-52
ELOVL2	94.9333	4.5048	0.291372	15.4606	6.39729e-54	9.97298e-52
PNP	475.356	-3.1464	0.20401	-15.4228	1.15036e-53	1.77761e-51
LIPH	188.2	-6.52759	0.423441	-15.4156	1.28609e-53	1.97007e-51
SLC22A6	504.822	-9.79714	0.63609	-15.4021	1.58399e-53	2.40548e-51
PTGER3	1482.73	-4.92324	0.319748	-15.3973	1.7074e-53	2.57073e-51
SLC23A1	137.044	-6.4265	0.417683	-15.3861	2.03009e-53	3.03068e-51
LINC00671	150.644	-7.7713	0.50634	-15.348	3.65406e-53	5.40924e-51
AFM	384.689	-8.94176	0.583021	-15.3369	4.33206e-53	6.35946e-51
AC009014.3	95.4444	-6.91385	0.451355	-15.318	5.80065e-53	8.44499e-51
ST6GAL2	352.178	3.6179	0.236528	15.2959	8.14537e-53	1.17614e-50
PTH2R	389.311	-5.38102	0.35297	-15.245	1.77748e-52	2.5457e-50
SLC22A12	415.111	-9.1911	0.603912	-15.2193	2.63421e-52	3.74228e-50
HOGA1	151.2	-4.79445	0.31561	-15.191	4.05375e-52	5.71287e-50
ALDH8A1	156.533	-4.24608	0.280124	-15.1579	6.72088e-52	9.39642e-50
RP11-622A1.2	117.6	-9.02778	0.597262	-15.1153	1.28425e-51	1.78136e-49
HPN	358.244	-5.90803	0.390888	-15.1144	1.30152e-51	1.79122e-49
PPP2R3A	1197.04	-1.62316	0.107483	-15.1016	1.57956e-51	2.15702e-49
UNC13B	650.2	-1.50547	0.0997765	-15.0884	1.93076e-51	2.61632e-49
ANGPTL3	95.3556	-7.18788	0.476583	-15.0821	2.12333e-51	2.85531e-49
LRP2	6714.42	-6.3679	0.422345	-15.0775	2.27808e-51	3.0402e-49
DPYS	437.467	-6.48575	0.430242	-15.0747	2.37675e-51	3.14804e-49
SMIM5	103.444	-4.63025	0.307256	-15.0696	2.56479e-51	3.37174e-49
RNF152	2481.09	-2.675	0.17754	-15.067	2.66779e-51	3.48117e-49
BBOX1	212.311	-6.2632	0.416399	-15.0413	3.93495e-51	5.09692e-49
CDH16	1893.96	-8.66638	0.576368	-15.0362	4.25254e-51	5.46809e-49
VIL1	77.5778	-4.91242	0.326915	-15.0266	4.91687e-51	6.2765e-49
SLC5A10	158.444	-6.78155	0.451554	-15.0182	5.57637e-51	7.06715e-49
TSPAN33	306.622	-3.10355	0.207258	-14.9744	1.08002e-50	1.35897e-48
GLDC	420.756	-4.97952	0.332999	-14.9536	1.47658e-50	1.84479e-48
A1CF	208.356	-7.64092	0.51126	-14.9453	1.67212e-50	2.07437e-48
PDZD3	109.822	-7.1143	0.476146	-14.9414	1.77196e-50	2.18286e-48
ATP6V0D2	313.356	-6.30098	0.422837	-14.9017	3.21328e-50	3.93091e-48
AGXT2	361.778	-8.93341	0.600256	-14.8827	4.27037e-50	5.18806e-48
RAP1GAP	804.444	-5.38619	0.36264	-14.8527	6.67922e-50	8.05898e-48
GCGR	154.556	-6.80836	0.459228	-14.8257	9.99633e-50	1.19793e-47
PRODH	317.956	-5.89763	0.398216	-14.8101	1.26029e-49	1.50009e-47
HNF4A	593.156	-8.31007	0.561824	-14.7912	1.66889e-49	1.9731e-47
TENM3	648.867	2.56887	0.173717	14.7877	1.75957e-49	2.06644e-47
EHHADH	424.733	-2.62258	0.177432	-14.7808	1.94907e-49	2.27383e-47
IRX2	180.844	-6.74775	0.45692	-14.7679	2.35955e-49	2.7346e-47
GSTM3	512.067	-3.11698	0.21122	-14.757	2.77415e-49	3.19408e-47
SMIM2-AS1	38.7333	-4.18019	0.283654	-14.737	3.73261e-49	4.26972e-47
ESRRB	135.444	-4.28683	0.290992	-14.7318	4.0276e-49	4.57744e-47
AQP6	88.7778	-5.37703	0.36518	-14.7243	4.49904e-49	5.08045e-47
SGK2	422.467	-3.90343	0.265194	-14.7192	4.85671e-49	5.44942e-47
PRODH2	584.956	-9.18955	0.6268	-14.661	1.14495e-48	1.27655e-46
SLC3A1	1507.16	-6.27016	0.428623	-14.6286	1.84558e-48	2.04476e-46
CTSL3P	30.5778	-7.398	0.506892	-14.5948	3.02964e-48	3.33564e-46
GGT6	190.378	-6.47928	0.443958	-14.5944	3.05085e-48	3.33813e-46
ABCC6	357.711	-4.36729	0.299531	-14.5804	3.7411e-48	4.0681e-46
RP13-452N2.1	50.8444	-7.52047	0.516033	-14.5736	4.13395e-48	4.46771e-46
UNC5CL	165.156	-3.33474	0.228937	-14.5662	4.608e-48	4.94966e-46
SH3PXD2B	409.511	2.74571	0.188573	14.5604	5.01473e-48	5.35391e-46
SLC4A4	1441.6	-3.71609	0.255703	-14.5329	7.5028e-48	7.96201e-46
PKLR	32.8444	-7.21662	0.49755	-14.5043	1.13762e-47	1.20002e-45
RBP1	336.333	2.75906	0.190231	14.5037	1.14716e-47	1.20288e-45
KHK	279.644	-4.9099	0.33914	-14.4775	1.681e-47	1.75222e-45
SLC27A2	344.178	-5.09446	0.351898	-14.4771	1.69135e-47	1.75263e-45
SACS	1342.04	2.43984	0.168552	14.4753	1.73657e-47	1.78897e-45
PTPRB	1283.04	-2.32251	0.160679	-14.4544	2.35264e-47	2.40954e-45
CLMN	1994.51	-2.57637	0.178288	-14.4506	2.48399e-47	2.52937e-45
ACAT1	663.933	-2.75989	0.191186	-14.4356	3.08991e-47	3.12827e-45
ARG2	645.644	-4.65106	0.322539	-14.4202	3.86439e-47	3.89e-45
DCXR	294.022	-2.78781	0.193641	-14.3968	5.42031e-47	5.42524e-45
PRR11	61.7556	2.71656	0.189014	14.3722	7.72903e-47	7.69235e-45
SLC6A13	624.756	-4.70554	0.327453	-14.3701	7.97052e-47	7.88813e-45
SLC17A1	509.667	-7.34296	0.51269	-14.3224	1.58525e-46	1.5601e-44
CLDN8	869.756	-8.12573	0.568168	-14.3016	2.13775e-46	2.09215e-44
LRRC19	232.222	-5.90709	0.413529	-14.2846	2.72928e-46	2.6563e-44
EPS8L2	1054.93	-5.09482	0.356717	-14.2825	2.81238e-46	2.72213e-44
AC004485.3	37.2222	-7.40387	0.518422	-14.2816	2.85183e-46	2.74524e-44
ACY3	86.1333	-6.59077	0.461874	-14.2696	3.384e-46	3.23981e-44
TINAGL1	725.111	-3.40189	0.238429	-14.2679	3.46633e-46	3.3007e-44
CDH9	56.1778	-6.65009	0.466364	-14.2594	3.91705e-46	3.70983e-44
KIFC3	454.022	-2.96788	0.208281	-14.2494	4.51912e-46	4.25715e-44
TRPV4	246.044	-3.07189	0.215642	-14.2454	4.7899e-46	4.48824e-44
CYSTM1	439.244	-2.76532	0.194182	-14.2409	5.10997e-46	4.76281e-44
ABCC2	398.711	-4.32793	0.30394	-14.2394	5.21593e-46	4.83599e-44
CDHR2	139.378	-5.32808	0.374259	-14.2363	5.45094e-46	5.02743e-44
RHBG	127.067	-6.53774	0.459368	-14.232	5.79678e-46	5.31854e-44
FBN2	1285.96	4.14772	0.291844	14.2121	7.70663e-46	7.0342e-44
AC137056.1	44.5556	-7.22469	0.508737	-14.2012	8.99967e-46	8.17207e-44
MPC1	400.222	-2.52414	0.17793	-14.1861	1.11638e-45	1.00852e-43
OGDHL	1147.91	-5.4147	0.381761	-14.1835	1.15938e-45	1.04202e-43
MEST	884.311	3.03179	0.213896	14.1741	1.32477e-45	1.18462e-43
TFCP2L1	2474.09	-5.96711	0.421336	-14.1624	1.56656e-45	1.39376e-43
FGFR3	533.889	-4.25473	0.301518	-14.111	3.24752e-45	2.87479e-43
PNPLA1	28.9556	-5.44313	0.385893	-14.1053	3.52345e-45	3.10346e-43
PPARA	1046.11	-2.31809	0.164477	-14.0937	4.15351e-45	3.64021e-43
PXDN	1756.67	2.26272	0.160665	14.0835	4.79782e-45	4.18408e-43
GSTA1	329.844	-7.87607	0.559879	-14.0675	6.0201e-45	5.22414e-43
ELMO3	82.0889	-3.41472	0.242815	-14.063	6.40705e-45	5.53268e-43
OLFML2B	430.556	3.80369	0.270524	14.0605	6.64586e-45	5.7109e-43
PRRG4	144.822	-3.25508	0.231591	-14.0553	7.14721e-45	6.1119e-43
CYB5A	568.711	-2.62866	0.187144	-14.0462	8.12643e-45	6.91571e-43
TMEM72	385.222	-5.69543	0.406019	-14.0275	1.05848e-44	8.96448e-43
SLC45A4	586.711	-2.09404	0.149491	-14.0079	1.39554e-44	1.17626e-42
RBP5	244.756	-4.19146	0.299955	-13.9737	2.25747e-44	1.89369e-42
AOC1	809.689	-7.58022	0.542528	-13.972	2.30935e-44	1.92803e-42
HNF1A	72.7778	-6.04185	0.432789	-13.9603	2.7238e-44	2.26333e-42
RP11-10J21.4	86.0889	-3.2232	0.231025	-13.9518	3.0697e-44	2.53878e-42
CYS1	480.444	-5.68904	0.40791	-13.9468	3.29096e-44	2.70904e-42
MT-CYB	96170.6	-2.45857	0.176465	-13.9323	4.03144e-44	3.30316e-42
SLC5A2	161.733	-5.44866	0.391116	-13.9311	4.1013e-44	3.34484e-42
DPEP1	500.267	-5.60943	0.402855	-13.9242	4.51596e-44	3.66604e-42
RP11-134F2.2	24.5556	-7.43733	0.534155	-13.9235	4.55809e-44	3.68327e-42
CNKSR1	77.1556	-2.80171	0.201267	-13.9204	4.7634e-44	3.81419e-42
TREH	22.2667	-6.62315	0.475785	-13.9205	4.75661e-44	3.81419e-42
AIF1L	1882.31	-3.35915	0.241902	-13.8864	7.65726e-44	6.10364e-42
BAIAP2L2	95.0889	-4.83962	0.348665	-13.8804	8.32366e-44	6.60493e-42
FAM83F	130.489	-5.21561	0.376601	-13.8492	1.28702e-43	1.01668e-41
HEPACAM2	52.3111	-6.54178	0.472377	-13.8486	1.29631e-43	1.01945e-41
EPHA3	493.244	3.88286	0.280569	13.8392	1.47776e-43	1.15699e-41
SERPINA6	37.3778	-7.45327	0.53935	-13.819	1.9581e-43	1.52628e-41
SLC28A1	260.889	-6.06268	0.438935	-13.8123	2.14972e-43	1.66826e-41
PALM3	70.2444	-5.13932	0.372163	-13.8093	2.23959e-43	1.73038e-41
KCNQ1	166.956	-2.49461	0.180812	-13.7967	2.66846e-43	2.05273e-41
ARHGAP11A	165.333	3.18162	0.230674	13.7927	2.82052e-43	2.16027e-41
USH1C	168.378	-4.55503	0.330481	-13.783	3.22393e-43	2.45856e-41
RP1-60O19.1	97.7111	-6.60364	0.479176	-13.7812	3.30564e-43	2.51001e-41
SLC30A2	43.1333	-6.683	0.485182	-13.7742	3.64248e-43	2.7539e-41
KCNJ3	162.622	-5.14415	0.373716	-13.7649	4.14583e-43	3.12107e-41
MEX3A	245.933	3.74907	0.272382	13.764	4.19648e-43	3.14576e-41
FBP1	350.489	-4.73892	0.345037	-13.7345	6.3086e-43	4.709e-41
TP53INP2	481.4	-2.17416	0.15847	-13.7197	7.74118e-43	5.75395e-41
RP11-386B13.4	43.3111	-7.11238	0.519062	-13.7024	9.82701e-43	7.27364e-41
CEP170	1236.53	1.68755	0.123161	13.702	9.88244e-43	7.28406e-41
SLC5A3	4692.16	-2.18982	0.160502	-13.6435	2.20649e-42	1.61957e-40
NOSTRIN	209.756	-2.71488	0.199095	-13.6361	2.44265e-42	1.78547e-40
SLC1A1	272.867	-3.77165	0.277512	-13.5909	4.53293e-42	3.29968e-40
TEK	451.578	-3.052	0.224588	-13.5893	4.63499e-42	3.36008e-40
UGT2B7	814.756	-6.96686	0.512877	-13.5839	4.99145e-42	3.60367e-40
ATP1B1	8864.04	-4.14572	0.305817	-13.5562	7.28174e-42	5.23572e-40
ADORA2A-AS1	66.0667	-5.92732	0.437806	-13.5387	9.2431e-42	6.61896e-40
AC009061.1	168.6	-4.63754	0.342662	-13.5339	9.86616e-42	7.03653e-40
HMGCS2	673.6	-8.81462	0.652173	-13.5158	1.26208e-41	8.96486e-40
CWH43	68.3778	-7.22893	0.53529	-13.5047	1.46734e-41	1.0381e-39
APOM	106.556	-4.24559	0.315592	-13.4528	2.96555e-41	2.08964e-39
SLC17A3	184.822	-6.53131	0.485674	-13.4479	3.16583e-41	2.22188e-39
RP11-627G23.1	128.378	-4.82908	0.359669	-13.4264	4.23244e-41	2.95867e-39
MAOA	384.111	-4.02541	0.299864	-13.4241	4.36803e-41	3.04139e-39
ADAMTS9-AS1	775.089	-4.04355	0.301384	-13.4166	4.83241e-41	3.35149e-39
TMEM52B	985.933	-7.24501	0.540039	-13.4157	4.8918e-41	3.37937e-39
DUSP9	65.7556	-5.56638	0.41507	-13.4107	5.23367e-41	3.60142e-39
DIO1	197.089	-8.33943	0.622077	-13.4058	5.59357e-41	3.8341e-39
ANPEP	1763.64	-5.37118	0.400959	-13.3958	6.39567e-41	4.3669e-39
TPX2	233.711	4.02689	0.300826	13.3861	7.28952e-41	4.958e-39
SHANK2	354.044	-4.49019	0.335783	-13.3723	8.78107e-41	5.94951e-39
DDC	587.178	-7.55553	0.56568	-13.3565	1.085e-40	7.32313e-39
PROM2	583.689	-4.27445	0.320607	-13.3324	1.50012e-40	1.00863e-38
SLC2A2	115.111	-6.86892	0.515336	-13.329	1.5696e-40	1.05134e-38
TINAG	251.733	-8.32884	0.624896	-13.3284	1.58312e-40	1.05637e-38
HRG	70.9333	-7.8972	0.592743	-13.3231	1.69792e-40	1.1287e-38
ASPDH	33.0444	-5.72143	0.429457	-13.3225	1.71348e-40	1.13476e-38
AQP7	65.1111	-4.90801	0.368601	-13.3152	1.8882e-40	1.24579e-38
PRDM16	299.822	-5.5849	0.419841	-13.3024	2.24063e-40	1.47279e-38
MKI67	1028.58	4.21944	0.317225	13.3011	2.28163e-40	1.49417e-38
CES3	88.7111	-4.53073	0.341121	-13.2819	2.94823e-40	1.92356e-38
CYP4V2	1160.62	-1.83167	0.138023	-13.2707	3.42294e-40	2.22504e-38
ATP1A1	9594.96	-2.80392	0.211727	-13.2431	4.94788e-40	3.20448e-38
SLC13A3	1029.36	-4.69666	0.354743	-13.2396	5.18294e-40	3.34442e-38
GALNT14	517.822	-4.2867	0.324289	-13.2188	6.83539e-40	4.39461e-38
MDK	631.311	3.70802	0.280554	13.2168	7.02246e-40	4.49846e-38
ARHGEF16	152.133	-3.9343	0.298295	-13.1893	1.01162e-39	6.4568e-38
PEBP1	1618.38	-2.0086	0.152425	-13.1776	1.18055e-39	7.50776e-38
EMX1	454.978	-7.97679	0.6061	-13.1608	1.47425e-39	9.34185e-38
ARHGAP11B	135.311	2.67865	0.203662	13.1524	1.64765e-39	1.03661e-37
SLC43A2	722	-2.83388	0.215461	-13.1526	1.64423e-39	1.03661e-37
PLIN5	58.7556	-4.72353	0.359275	-13.1474	1.76139e-39	1.10422e-37
TRANK1	844.867	1.68661	0.12831	13.1448	1.82382e-39	1.1393e-37
RAMP3	100.311	-2.88272	0.219362	-13.1414	1.90756e-39	1.18741e-37
PLLP	123.978	-3.91684	0.298157	-13.1368	2.02591e-39	1.25664e-37
CENPE	214.667	3.16271	0.240783	13.1351	2.0714e-39	1.28035e-37
LRFN5	395.356	4.3034	0.327886	13.1247	2.37757e-39	1.46445e-37
CLDN10	332.489	-5.78219	0.440631	-13.1225	2.44676e-39	1.50182e-37
PTH1R	974.956	-4.79484	0.365498	-13.1187	2.57475e-39	1.57489e-37
ABCC6P1	70.7778	-4.98071	0.380114	-13.1032	3.15596e-39	1.92372e-37
CDCA2	84.3556	3.88098	0.296362	13.0954	3.4981e-39	2.12491e-37
SLC13A2	137.711	-8.725	0.666645	-13.0879	3.85964e-39	2.33648e-37
NR1I3	43.7778	-6.37989	0.487605	-13.0841	4.0576e-39	2.4479e-37
PAQR7	333.489	-1.99605	0.152563	-13.0834	4.09494e-39	2.46199e-37
ASPG	65.1778	-6.93529	0.531091	-13.0586	5.67829e-39	3.40234e-37
ASPM	566.267	4.58258	0.35134	13.0432	6.94954e-39	4.14994e-37
AC019181.2	195.533	-6.35685	0.487453	-13.041	7.15574e-39	4.25863e-37
CTH	126.089	-2.47524	0.190004	-13.0273	8.55545e-39	5.0745e-37
SLC22A13	102.622	-5.16768	0.397455	-13.0019	1.19306e-38	7.05264e-37
REEP6	47.7778	-3.91799	0.301496	-12.9951	1.30368e-38	7.6808e-37
NR0B2	41.7556	-6.89789	0.531109	-12.9877	1.43658e-38	8.43562e-37
NPY1R	430.6	-4.04142	0.311279	-12.9832	1.52295e-38	8.91305e-37
RNF186	36.4222	-6.97874	0.537595	-12.9814	1.56008e-38	9.1001e-37
GPD1	241.311	-5.44153	0.420074	-12.9537	2.23758e-38	1.3009e-36
RAB17	225.378	-4.70273	0.363208	-12.9478	2.41897e-38	1.40173e-36
CLNK	141.156	-4.0814	0.315229	-12.9474	2.4301e-38	1.40356e-36
FCAMR	93.1333	-7.10212	0.548866	-12.9396	2.68922e-38	1.54814e-36
VEPH1	385.711	-3.50019	0.271041	-12.9139	3.75892e-38	2.15691e-36
MUC15	271.422	-7.81879	0.605767	-12.9072	4.09673e-38	2.34312e-36
GOT1	435.244	-2.3786	0.184956	-12.8604	7.52e-38	4.28713e-36
RP4-541C22.5	22.2889	-5.12571	0.398807	-12.8526	8.31756e-38	4.72652e-36
CAPN12	115.622	-4.46691	0.347746	-12.8453	9.13662e-38	5.17526e-36
BRIP1	177.911	3.27502	0.255206	12.8329	1.07333e-37	6.06017e-36
KIF20A	96.9111	4.25266	0.331435	12.8311	1.09821e-37	6.18082e-36
KLHDC7A	106.933	-4.78969	0.373442	-12.8258	1.17591e-37	6.5971e-36
DAO	89.9778	-7.17054	0.559128	-12.8245	1.19538e-37	6.68505e-36
DUSP15	66.4444	-2.8536	0.2226	-12.8194	1.27704e-37	7.11909e-36
ENAM	140.667	-5.23858	0.408953	-12.8097	1.44621e-37	8.03674e-36
MSRB1	139.911	-1.95989	0.153111	-12.8005	1.62998e-37	9.02945e-36
AFMID	427.467	-2.03305	0.158853	-12.7983	1.67518e-37	9.2508e-36
ACMSD	181.622	-6.56711	0.513739	-12.783	2.04141e-37	1.1238e-35
RNF175	24.7556	5.53881	0.434031	12.7613	2.69507e-37	1.47901e-35
TOP2A	701.533	4.60289	0.361511	12.7324	3.90752e-37	2.13773e-35
LNX1	324.2	-4.84952	0.380934	-12.7306	3.99688e-37	2.17985e-35
SUSD2	290.822	-4.37698	0.344827	-12.6933	6.44387e-37	3.50356e-35
C19orf77	401.289	-6.43557	0.508755	-12.6496	1.12411e-36	6.09301e-35
DNASE1L3	113.556	-3.70099	0.29322	-12.6219	1.59941e-36	8.64272e-35
FABP1	33.7333	-6.71173	0.532441	-12.6056	1.96682e-36	1.05956e-34
ZYG11A	116.089	-5.60095	0.444871	-12.59	2.39552e-36	1.28657e-34
C16orf11	29.3111	-6.16826	0.490062	-12.5867	2.49962e-36	1.3384e-34
ESRP2	174.489	-4.04181	0.321453	-12.5736	2.95038e-36	1.57497e-34
XPOT	819.222	1.34263	0.106829	12.568	3.16603e-36	1.68498e-34
ACO2	1063.76	-1.66919	0.132824	-12.5669	3.20939e-36	1.70291e-34
C11orf54	1002.49	-2.34752	0.186974	-12.5553	3.7186e-36	1.96717e-34
PVALB	43.6667	-5.41359	0.431862	-12.5354	4.77644e-36	2.51921e-34
MTTP	45.2889	-4.0586	0.323818	-12.5336	4.89051e-36	2.57168e-34
MT-ND1	95938	-2.53488	0.202669	-12.5075	6.79636e-36	3.56323e-34
GPX3	6659.53	-5.12739	0.410358	-12.4949	7.95822e-36	4.16e-34
NAGS	31.9556	-3.52123	0.281871	-12.4923	8.21974e-36	4.28399e-34
RP5-881L22.4	51.3333	-7.79995	0.625094	-12.478	9.83874e-36	5.11266e-34
BDKRB2	180.333	-3.62385	0.290623	-12.4692	1.09869e-35	5.6925e-34
ACPP	255.733	-3.41945	0.274414	-12.4609	1.21993e-35	6.30213e-34
MARVELD3	96.6444	-4.46626	0.35856	-12.4561	1.29544e-35	6.67267e-34
NCAPG	186.444	4.23908	0.340727	12.4413	1.5602e-35	8.01297e-34
LINC01020	36.6667	-7.07416	0.569017	-12.4322	1.74673e-35	8.94488e-34
AKR7A3	115.222	-3.17948	0.255917	-12.4239	1.9392e-35	9.90175e-34
ATAD2	542.4	2.22593	0.179229	12.4195	2.04759e-35	1.04249e-33
CKAP2L	71.0222	4.27989	0.344811	12.4123	2.24164e-35	1.13801e-33
CASR	540.333	-7.08474	0.571248	-12.4022	2.54221e-35	1.28688e-33
PLCG2	927.311	-2.55248	0.205904	-12.3965	2.73135e-35	1.37867e-33
BIRC5	77.3556	3.73123	0.301023	12.3952	2.77578e-35	1.39709e-33
CYP2B6	27.4222	-5.69827	0.460795	-12.3662	3.98337e-35	1.99917e-33
ADH6	106.533	-5.9266	0.479436	-12.3616	4.21621e-35	2.11002e-33
C2orf54	49.4222	-5.98631	0.484527	-12.355	4.57971e-35	2.28544e-33
KLF15	134.133	-3.35355	0.272179	-12.3211	6.97429e-35	3.47059e-33
RP11-192H23.4	163.711	-3.32009	0.269563	-12.3166	7.37415e-35	3.65924e-33
HIST1H3B	619.556	4.47134	0.36311	12.314	7.61335e-35	3.76733e-33
PTGER1	123.089	-4.48587	0.364752	-12.2984	9.23684e-35	4.55788e-33
C14orf164	27.4667	-5.11886	0.416611	-12.2869	1.06485e-34	5.23978e-33
HJURP	76.2889	4.31221	0.351074	12.2829	1.11897e-34	5.49077e-33
MT-CO1	364072	-2.29803	0.187103	-12.2822	1.12939e-34	5.52646e-33
RILP	41.6222	-2.83861	0.23163	-12.255	1.58032e-34	7.71162e-33
FBLN7	108.867	2.99013	0.244246	12.2423	1.84755e-34	8.99074e-33
THBS4	298.8	3.79174	0.310204	12.2234	2.33185e-34	1.13162e-32
2025-03-03	77.8889	2.57933	0.211088	12.2192	2.45462e-34	1.18793e-32
SERINC2	312.778	-2.74678	0.224976	-12.2092	2.775e-34	1.33919e-32
SGCD	596.578	3.22166	0.263875	12.209	2.78238e-34	1.33919e-32
RP11-513O17.2	275.422	-5.45865	0.447121	-12.2085	2.80148e-34	1.34471e-32
GGT1	251.4	-3.70162	0.303241	-12.2069	2.8572e-34	1.36773e-32
MUC1	621.756	-4.94019	0.404728	-12.2062	2.88078e-34	1.37528e-32
CEP55	51.5111	3.58459	0.293729	12.2037	2.96884e-34	1.41349e-32
KAL1	171.889	2.6283	0.215517	12.1954	3.29057e-34	1.56245e-32
GXYLT2	359.756	3.18018	0.261197	12.1754	4.20259e-34	1.99013e-32
SLC26A1	88.9778	-4.88946	0.401942	-12.1646	4.79928e-34	2.2666e-32
SLC5A11	58.3333	-5.4416	0.447389	-12.163	4.89108e-34	2.30378e-32
RBP4	68.8444	-4.96936	0.408593	-12.1621	4.94593e-34	2.3234e-32
NTN4	1179.47	-3.2585	0.268168	-12.151	5.67015e-34	2.65652e-32
BSND	121.333	-8.80219	0.724418	-12.1507	5.68652e-34	2.65713e-32
ESRRA	128.978	-2.35015	0.193705	-12.1327	7.09125e-34	3.30475e-32
EXOC3L2	83.9333	-2.75394	0.227099	-12.1266	7.63207e-34	3.5474e-32
LMNB1	292.467	2.62772	0.216777	12.1217	8.10149e-34	3.75568e-32
HMMR	60.2	2.68532	0.221575	12.1192	8.35332e-34	3.86226e-32
CASKIN2	287.222	-1.52382	0.126103	-12.0839	1.28427e-33	5.90955e-32
MT-ND2	81684.3	-2.33519	0.193248	-12.0839	1.28483e-33	5.90955e-32
ANLN	251.578	4.05879	0.336172	12.0736	1.45657e-33	6.68202e-32
ENC1	1814.76	3.33493	0.276387	12.0662	1.59336e-33	7.29056e-32
COL13A1	161.689	3.44802	0.285793	12.0647	1.62162e-33	7.40064e-32
C9orf66	38.3333	-5.73958	0.476105	-12.0553	1.81904e-33	8.28017e-32
UGT2A3	46.3556	-7.07866	0.58731	-12.0527	1.87744e-33	8.52396e-32
RP5-952N6.1	35.2444	-6.46146	0.53685	-12.0359	2.30146e-33	1.04223e-31
RORC	180.733	-3.67908	0.305796	-12.0312	2.43704e-33	1.10079e-31
HECW1	180.489	-4.81861	0.400887	-12.0199	2.79447e-33	1.25901e-31
MT-ND5	116331	-2.29377	0.191129	-12.0011	3.50457e-33	1.57491e-31
NAPSA	61.2222	-3.87736	0.323236	-11.9955	3.75295e-33	1.68224e-31
KLKB1	114.778	-3.06365	0.255965	-11.969	5.16431e-33	2.309e-31
CGNL1	3852.53	-2.91542	0.243586	-11.9688	5.17997e-33	2.31014e-31
SLC9A4	179.711	-7.82815	0.655575	-11.9409	7.2433e-33	3.22217e-31
SLC16A7	477.022	-3.5472	0.297967	-11.9047	1.11903e-32	4.96544e-31
SLC22A24	38.1778	-6.89728	0.579391	-11.9044	1.12312e-32	4.97109e-31
UPP2	165.756	-4.39396	0.369845	-11.8805	1.4943e-32	6.59737e-31
CNTNAP2	742.378	4.12395	0.347395	11.8711	1.67281e-32	7.36705e-31
PDXK	1790.09	-1.754	0.147786	-11.8685	1.72488e-32	7.57742e-31
TMEM37	287.333	-3.1162	0.262605	-11.8665	1.76668e-32	7.74176e-31
BUB1B	142.889	3.44434	0.290373	11.8618	1.87002e-32	8.17425e-31
POLQ	139.844	3.29135	0.277532	11.8594	1.92413e-32	8.38998e-31
GPR160	202.733	-2.82201	0.238096	-11.8524	2.091e-32	9.09508e-31
CLDN2	224.067	-5.54869	0.468857	-11.8345	2.58913e-32	1.1234e-30
ATP6V1G3	12.8	-6.24614	0.528292	-11.8233	2.95877e-32	1.28063e-30
RP11-61A14.3	77.8889	-1.91582	0.162048	-11.8225	2.985e-32	1.28882e-30
PLCL1	775.644	-3.10873	0.263115	-11.8151	3.26197e-32	1.40496e-30
FAM107B	1014.69	-2.08514	0.176583	-11.8083	3.53634e-32	1.51942e-30
CISH	300.956	-2.5133	0.212986	-11.8003	3.88814e-32	1.66651e-30
EPHX2	656.867	-2.4169	0.204894	-11.7959	4.09901e-32	1.75262e-30
ZNF44	481	-1.25173	0.106128	-11.7945	4.16822e-32	1.7779e-30
UHRF1	125.022	3.77033	0.319703	11.7932	4.22962e-32	1.79973e-30
KIF15	152.222	3.51279	0.297911	11.7914	4.32205e-32	1.83463e-30
GPR161	82.0222	2.00759	0.170365	11.7841	4.71696e-32	1.99745e-30
PLA2G4F	171.378	-5.59348	0.474961	-11.7767	5.14583e-32	2.17384e-30
RP1-145M24.1	97.2667	-3.14159	0.267067	-11.7633	6.0315e-32	2.54189e-30
CISD3	69.7778	-1.72075	0.14636	-11.757	6.50229e-32	2.73375e-30
COBLL1	4637.67	-3.80763	0.324259	-11.7425	7.7132e-32	3.23514e-30
CKAP4	567.378	1.44171	0.122961	11.7249	9.50026e-32	3.97522e-30
ALPL	170.889	-3.85535	0.329136	-11.7135	1.08651e-31	4.53552e-30
SLC52A3	60.6889	-5.20642	0.444502	-11.7129	1.09436e-31	4.55749e-30
NCAPH	53.9778	3.58719	0.306284	11.712	1.10649e-31	4.59716e-30
SLC16A9	892.311	-3.12065	0.266519	-11.709	1.14684e-31	4.75357e-30
NEK2	43.5778	4.51683	0.385771	11.7086	1.15182e-31	4.76302e-30
NOS1	88.3333	-5.10963	0.436415	-11.7082	1.15724e-31	4.77421e-30
ROBO1	1284.69	2.69049	0.22986	11.7049	1.20294e-31	4.95116e-30
TMEM88	51.4889	-2.20185	0.188175	-11.7011	1.25861e-31	5.16823e-30
SLC47A1	513.156	-3.86605	0.330457	-11.6991	1.28827e-31	5.2777e-30
TTC38	432.578	-1.75278	0.149874	-11.695	1.35137e-31	5.52338e-30
SLC23A3	250.378	-3.55746	0.304403	-11.6867	1.49107e-31	6.08024e-30
APBA2	111.978	4.06654	0.347972	11.6864	1.49577e-31	6.08533e-30
CPT1A	1095.96	-1.85163	0.158552	-11.6784	1.64422e-31	6.67387e-30
GAL3ST1	60.0667	-4.36134	0.373554	-11.6753	1.7054e-31	6.90627e-30
SCNN1A	1289.58	-5.80907	0.497729	-11.6712	1.78961e-31	7.23066e-30
FAM195A	111.756	-2.68735	0.230289	-11.6695	1.82515e-31	7.35739e-30
GABARAPL1	783.2	-1.55357	0.133144	-11.6684	1.84949e-31	7.4385e-30
MTATP6P1	15414.4	-2.32345	0.199152	-11.6667	1.88677e-31	7.57117e-30
PTER	367.556	-2.86684	0.246131	-11.6476	2.36048e-31	9.45049e-30
ELOVL7	253.022	-3.83936	0.329764	-11.6427	2.49832e-31	9.96632e-30
FOLR1	147.511	-4.15895	0.357222	-11.6425	2.50629e-31	9.96632e-30
EDA2R	83.2444	4.33183	0.37207	11.6425	2.50519e-31	9.96632e-30
KIF4A	108.711	3.05277	0.262323	11.6374	2.65951e-31	1.05518e-29
GAS2L3	226.111	2.3728	0.203914	11.6363	2.69525e-31	1.06696e-29
GRAMD1C	394.667	-3.08095	0.265194	-11.6177	3.34967e-31	1.32305e-29
KIF12	783.178	-4.89457	0.42153	-11.6115	3.6043e-31	1.42043e-29
TTC22	74.2889	-3.74231	0.3223	-11.6112	3.61326e-31	1.42079e-29
ZNF684	81.1778	-1.31019	0.112883	-11.6067	3.8123e-31	1.49571e-29
MT-ND4	197825	-2.21993	0.191325	-11.6029	3.98207e-31	1.55885e-29
CLDN16	257.022	-5.0091	0.431769	-11.6014	4.05569e-31	1.58415e-29
TUBA1B	1985.2	1.97907	0.170621	11.5992	4.15844e-31	1.62069e-29
TTK	109.689	4.29531	0.370534	11.5922	4.51375e-31	1.75528e-29
RP11-283I3.4	35.8444	-4.2394	0.366199	-11.5768	5.40481e-31	2.09716e-29
CNNM2	476.467	-1.59477	0.137802	-11.5729	5.65286e-31	2.18684e-29
HNF1A-AS1	94.6222	-5.5996	0.483859	-11.5728	5.66075e-31	2.18684e-29
LMNB2	254.244	1.70494	0.147442	11.5635	6.30908e-31	2.43196e-29
LRRN1	487.778	3.99525	0.34553	11.5627	6.36866e-31	2.44957e-29
RPS2	1725.89	1.2175	0.105419	11.5491	7.45665e-31	2.86179e-29
hsa-mir-1199	28.4	-4.12969	0.357696	-11.5452	7.80196e-31	2.98781e-29
MT1E	106.911	-3.56171	0.308558	-11.5431	8.0022e-31	3.05785e-29
ASRGL1	149.956	-2.32408	0.201385	-11.5405	8.24684e-31	3.14451e-29
NDRG1	2815.76	-2.40843	0.208723	-11.5389	8.39958e-31	3.19583e-29
TMEM61	22.5333	-4.45126	0.385855	-11.5361	8.67956e-31	3.29524e-29
LAMA4	1784.56	2.71942	0.235906	11.5276	9.58147e-31	3.62983e-29
SLCO5A1	95.2	4.11292	0.357053	11.5191	1.0574e-30	3.99725e-29
KIAA1161	192.667	-2.28164	0.198095	-11.5179	1.07185e-30	4.04319e-29
KIF14	110.511	4.00474	0.347944	11.5097	1.17854e-30	4.43614e-29
GLTPD2	28.4889	-5.89393	0.512152	-11.5082	1.19979e-30	4.50651e-29
HIST1H3F	268.978	3.47749	0.302521	11.4951	1.39696e-30	5.23593e-29
ADD2	36.3556	6.45568	0.561989	11.4872	1.52965e-30	5.72107e-29
MT-CO3	126471	-2.33391	0.203208	-11.4853	1.56334e-30	5.83469e-29
PDE2A	220.2	-2.59867	0.226435	-11.4764	1.73293e-30	6.45399e-29
DSCAML1	252.267	-3.19857	0.278747	-11.4748	1.765e-30	6.55955e-29
SCIN	1022.69	-4.66094	0.406457	-11.4672	1.9271e-30	7.14692e-29
COL18A1-AS1	17.5111	-4.80286	0.41919	-11.4575	2.15739e-30	7.98416e-29
KCNJ10	299.2	-6.20137	0.541447	-11.4533	2.26294e-30	8.35723e-29
COL4A3	1482.76	-4.58819	0.400662	-11.4515	2.31071e-30	8.5158e-29
OGDH	1043.36	-1.21338	0.106	-11.447	2.4331e-30	8.94812e-29
ANTXR1	1723.09	2.32483	0.203103	11.4466	2.44666e-30	8.97926e-29
ESPN	100.844	-4.01297	0.350623	-11.4453	2.48353e-30	9.09562e-29
ANXA9	68.5111	-4.20016	0.367118	-11.4409	2.61193e-30	9.54601e-29
C1orf115	284.778	-3.10503	0.271526	-11.4355	2.7797e-30	1.01381e-28
SLC34A3	65.1778	-6.35836	0.556247	-11.4308	2.93278e-30	1.06743e-28
AC013268.5	29.4222	-3.32552	0.2911	-11.424	3.17258e-30	1.15233e-28
RAD51AP1	93.4667	3.00689	0.263276	11.4211	3.28239e-30	1.18977e-28
ATP6V1B1	213.844	-5.07592	0.444517	-11.419	3.36236e-30	1.21625e-28
TRPC7-AS1	15.3111	-5.67274	0.497135	-11.4108	3.69107e-30	1.33242e-28
CBR3-AS1	104.511	-2.27037	0.198974	-11.4104	3.71122e-30	1.33695e-28
KCNJ15	1333.53	-4.29035	0.376021	-11.4099	3.73227e-30	1.34179e-28
HIST1H2BO	124.4	3.99614	0.350434	11.4034	4.02108e-30	1.44268e-28
SIX1	171.911	6.75799	0.592763	11.4008	4.14109e-30	1.48271e-28
GPT	125.356	-4.59734	0.403331	-11.3984	4.25721e-30	1.5212e-28
RP1	107.111	-5.27406	0.462802	-11.3959	4.38052e-30	1.56209e-28
ACAA1	367.511	-1.73785	0.152586	-11.3894	4.7246e-30	1.68139e-28
RP11-394O9.1	100.933	-4.83132	0.424526	-11.3805	5.23069e-30	1.85774e-28
CMTM4	964.089	-2.12138	0.186409	-11.3802	5.24568e-30	1.85931e-28
CLRN3	29.5556	-5.67169	0.498827	-11.37	5.89623e-30	2.0857e-28
NQO2	355.978	-2.13241	0.187954	-11.3454	7.81778e-30	2.75988e-28
PNPLA2	421.911	-1.52401	0.134355	-11.3432	8.01747e-30	2.82472e-28
HIST1H1B	428.533	3.65673	0.322451	11.3404	8.27442e-30	2.90942e-28
ENTPD5	556.111	-1.83246	0.161707	-11.332	9.11192e-30	3.19752e-28
SPTBN2	1244.62	-3.55204	0.313766	-11.3207	1.03692e-29	3.63148e-28
CCDC88A	1484.4	1.92418	0.170028	11.3169	1.08278e-29	3.78456e-28
CASZ1	560.267	-3.21715	0.284415	-11.3115	1.15152e-29	4.01685e-28
TCL6	94.6	-4.01445	0.355012	-11.3079	1.19908e-29	4.17451e-28
CGN	376.6	-4.17136	0.368901	-11.3075	1.20414e-29	4.18386e-28
LINC00955	40.7556	-6.6164	0.58536	-11.3031	1.26624e-29	4.39096e-28
FANCI	235.511	2.55931	0.226527	11.298	1.3421e-29	4.64486e-28
AP001626.1	67.9111	-5.04293	0.446532	-11.2935	1.41243e-29	4.87868e-28
SLC16A5	254.778	-2.91753	0.258393	-11.2911	1.45229e-29	5.00658e-28
MARCKS	1440.53	2.07471	0.183945	11.279	1.6662e-29	5.73278e-28
DDAH1	1174.6	-1.91786	0.170074	-11.2766	1.71214e-29	5.87934e-28
NUSAP1	171.733	2.76628	0.245363	11.2742	1.75905e-29	6.02868e-28
LINC00473	505.133	-4.37595	0.388159	-11.2736	1.77188e-29	6.06085e-28
COL3A1	43424.6	3.65817	0.32472	11.2656	1.94041e-29	6.62446e-28
C14orf105	838.8	-5.43556	0.482798	-11.2585	2.10421e-29	7.16978e-28
AL138847.1	11.5778	-5.17363	0.459544	-11.2582	2.11058e-29	7.17759e-28
DTL	156.756	3.84257	0.341481	11.2527	2.24668e-29	7.62571e-28
GATA3	427.933	-4.48976	0.39914	-11.2486	2.35366e-29	7.97348e-28
hsa-mir-6723	2704.31	-2.40643	0.21425	-11.2319	2.8444e-29	9.61746e-28
PDHA1	709.511	-1.23168	0.109672	-11.2306	2.88668e-29	9.74172e-28
MT-ND4L	46082.5	-2.1574	0.192135	-11.2286	2.95064e-29	9.93854e-28
MARCKSL1	261.178	2.27856	0.203035	11.2225	3.16243e-29	1.06315e-27
RP11-56A10.1	34.5778	-5.4762	0.488017	-11.2213	3.20399e-29	1.07508e-27
PPP1R1A	140.822	-3.53433	0.315142	-11.215	3.4401e-29	1.15211e-27
SLC16A4	385.022	-3.32055	0.296136	-11.2129	3.52265e-29	1.17751e-27
LOXL2	335.978	2.11988	0.189127	11.2088	3.6931e-29	1.23215e-27
CXCL14	776.933	-4.72122	0.421236	-11.208	3.72447e-29	1.24027e-27
LLGL2	604.667	-3.50235	0.312597	-11.204	3.89535e-29	1.29473e-27
IGF2	7224.8	3.53291	0.315509	11.1975	4.19321e-29	1.3911e-27
CTD-2008L17.1	67.7333	4.63822	0.414418	11.1921	4.45501e-29	1.47518e-27
CXCR4	517.044	2.62442	0.23455	11.1892	4.60693e-29	1.52262e-27
CCNB2	76.6889	4.14445	0.370552	11.1845	4.85549e-29	1.60176e-27
RP11-478K15.6	66.9556	3.62751	0.324409	11.1819	5.00004e-29	1.64637e-27
TMEM82	18.6	-6.73028	0.601966	-11.1805	5.0811e-29	1.66994e-27
PGPEP1	499.511	-2.03519	0.182114	-11.1753	5.38517e-29	1.76658e-27
CAPN13	122.089	-4.46281	0.399486	-11.1714	5.62864e-29	1.84301e-27
RP11-728F11.4	70.1778	-4.227	0.378385	-11.1712	5.64398e-29	1.84461e-27
HDAC9	499.644	2.19232	0.196284	11.1692	5.77255e-29	1.88313e-27
ESCO2	60.0444	3.92338	0.351434	11.1639	6.123e-29	1.99377e-27
AK4	1359.76	-4.14752	0.371906	-11.1521	6.99574e-29	2.27374e-27
LDLRAD3	221.533	1.85465	0.166397	11.146	7.49335e-29	2.43099e-27
MT-ATP8	4475.22	-2.15436	0.193291	-11.1457	7.51455e-29	2.43339e-27
PARK2	176.556	-1.96144	0.176104	-11.138	8.19615e-29	2.64924e-27
C4orf19	96.4	-3.92254	0.352402	-11.1309	8.87742e-29	2.86419e-27
CTD-2194A8.2	14.2	-5.9051	0.530601	-11.1291	9.05621e-29	2.91653e-27
RP3-333A15.2	36.5111	-4.25078	0.382322	-11.1183	1.02184e-28	3.28481e-27
BAI2	103.756	2.1905	0.197083	11.1146	1.06547e-28	3.41883e-27
CDCA7	83.1111	4.38126	0.394243	11.1131	1.08354e-28	3.47048e-27
SCG5	64.1778	4.63963	0.41775	11.1062	1.16985e-28	3.74013e-27
PIPOX	172.822	-3.3411	0.301089	-11.0967	1.30134e-28	4.15299e-27
COL5A2	2417	2.74966	0.24785	11.0941	1.34074e-28	4.27097e-27
SVOPL	75.9556	-5.67356	0.511577	-11.0903	1.39766e-28	4.44426e-27
GBA2	633.756	-1.2973	0.116983	-11.0896	1.40845e-28	4.4705e-27
PC	269.844	-2.46288	0.222164	-11.0858	1.46982e-28	4.6569e-27
INADL	2564.33	-2.0517	0.185126	-11.0827	1.52133e-28	4.81145e-27
NDC80	92.4	3.37499	0.304583	11.0807	1.55667e-28	4.9144e-27
MT-ATP6	74534.6	-2.26008	0.204138	-11.0713	1.72818e-28	5.44608e-27
ZNF208	134.178	-4.25033	0.384015	-11.0681	1.79127e-28	5.63481e-27
ASL	98.7556	-1.68424	0.152341	-11.0557	2.05713e-28	6.45962e-27
MT-CO2	90767.6	-2.20949	0.20001	-11.0469	2.26968e-28	7.11435e-27
RAPGEF3	764.356	-2.63245	0.238346	-11.0447	2.3263e-28	7.27889e-27
TST	121.267	-2.10616	0.190719	-11.0433	2.36318e-28	7.38116e-27
PIGQ	393.333	-1.51914	0.137604	-11.0399	2.45182e-28	7.64447e-27
NREP	2790.64	2.22369	0.201517	11.0347	2.59778e-28	8.08523e-27
GABRA2	249.933	-4.85765	0.440567	-11.0259	2.86564e-28	8.9032e-27
CHST11	205.4	2.25267	0.204462	11.0175	3.14586e-28	9.75659e-27
BUB1	143.822	3.95212	0.358752	11.0163	3.18849e-28	9.87144e-27
DEPDC1	75.8444	4.46695	0.405926	11.0044	3.6408e-28	1.1252e-26
SPC24	55.2444	2.87957	0.261702	11.0032	3.68692e-28	1.13746e-26
AC013463.2	163.378	-5.04425	0.458987	-10.99	4.27096e-28	1.31534e-26
LHFPL2	491.778	2.49259	0.226907	10.9851	4.50769e-28	1.38582e-26
GAL3ST4	64.3556	3.29735	0.300582	10.9699	5.33427e-28	1.63708e-26
FECH	390.378	-1.15265	0.105111	-10.966	5.56782e-28	1.70579e-26
NUF2	82.4889	4.0628	0.370642	10.9615	5.85047e-28	1.78927e-26
WNT5B	60.8889	2.37624	0.216847	10.9582	6.07234e-28	1.8539e-26
FRMD1	215.044	-5.74921	0.524699	-10.9572	6.13928e-28	1.8711e-26
PTGR1	517.533	-1.78886	0.163264	-10.9568	6.16262e-28	1.87497e-26
XXyac-YM21GA2.7	14.5778	-5.14998	0.470084	-10.9554	6.25787e-28	1.90067e-26
ADCY2	177.889	3.55337	0.324775	10.941	7.33651e-28	2.22444e-26
PHYHIPL	155.689	-3.12991	0.286125	-10.939	7.5052e-28	2.27168e-26
HIST3H2A	60.6889	3.25358	0.297436	10.9388	7.5212e-28	2.27261e-26
SPNS2	271.4	-3.78406	0.345937	-10.9386	7.53696e-28	2.27348e-26
KCNK5	256.467	-4.07304	0.372425	-10.9365	7.70837e-28	2.32005e-26
TCF4	3560.36	2.00758	0.183568	10.9364	7.7177e-28	2.32005e-26
ENAH	1953.78	1.82412	0.166891	10.93	8.28158e-28	2.48532e-26
LPPR1	108.511	-4.712	0.431691	-10.9152	9.75167e-28	2.92152e-26
DYRK2	689.022	1.75178	0.160548	10.9112	1.01853e-27	3.04627e-26
CPEB4	2012.38	-2.53826	0.232646	-10.9104	1.02768e-27	3.0684e-26
ATP6V1A	1459.53	-1.46892	0.134869	-10.8914	1.26662e-27	3.77542e-26
TYMS	142.822	2.64974	0.243711	10.8725	1.5586e-27	4.63787e-26
TMEM207	85.6222	-7.64976	0.704209	-10.8629	1.73155e-27	5.14385e-26
CTSH	760.956	-2.52517	0.232694	-10.8519	1.9539e-27	5.79459e-26
ARSF	13.5778	-5.68582	0.524128	-10.8482	2.03493e-27	6.02476e-26
CDH1	1294.36	-3.8738	0.357207	-10.8447	2.11401e-27	6.24839e-26
MEI4	29.7778	-5.00948	0.461946	-10.8443	2.12296e-27	6.26432e-26
NUGGC	58.2444	-3.03267	0.27969	-10.843	2.15391e-27	6.34503e-26
AKR7L	43.8667	-2.72832	0.251637	-10.8423	2.16929e-27	6.37966e-26
PTTG1	63.1333	3.67946	0.33943	10.8401	2.22204e-27	6.52392e-26
SEPHS2	423.267	-1.5955	0.147196	-10.8393	2.24146e-27	6.56999e-26
STARD10	177.289	-1.7888	0.165065	-10.8369	2.30138e-27	6.73441e-26
RNU6-35P	25.1778	-6.15174	0.568312	-10.8246	2.63302e-27	7.69208e-26
RP11-273B20.1	24.5556	-2.74559	0.25423	-10.7996	3.45651e-27	1.00811e-25
HDHD3	95.1556	-1.96242	0.18175	-10.7973	3.54319e-27	1.03168e-25
HIST1H2BH	107.844	3.03648	0.281251	10.7963	3.58253e-27	1.04142e-25
SLC9A2	148.178	-4.76643	0.441681	-10.7916	3.77321e-27	1.09504e-25
SULT1C2	1041.64	-3.78423	0.350782	-10.788	3.92323e-27	1.1367e-25
POMK	261.578	1.52542	0.141465	10.783	4.14306e-27	1.19843e-25
SLC25A33	135.467	-1.74315	0.161677	-10.7817	4.20096e-27	1.21318e-25
RTKN2	154.956	3.01533	0.279678	10.7814	4.21222e-27	1.21444e-25
ACADSB	560.467	-1.73088	0.160661	-10.7735	4.59102e-27	1.32149e-25
TSPAN1	316.067	-3.76376	0.349359	-10.7733	4.60109e-27	1.32223e-25
ANKRD9	92.0444	-1.97354	0.183236	-10.7705	4.74309e-27	1.36082e-25
UGT3A1	274.778	-4.86781	0.452057	-10.7681	4.86839e-27	1.3945e-25
TRAIP	36.3111	2.52704	0.234781	10.7634	5.12545e-27	1.46575e-25
FSCN1	567.178	1.97589	0.183582	10.763	5.14822e-27	1.46987e-25
PKHD1	5963.82	-5.66925	0.52716	-10.7543	5.65449e-27	1.6118e-25
EIF2S2P2	20.2	-3.69251	0.343399	-10.7528	5.74661e-27	1.63542e-25
AC073218.2	389.267	-5.81724	0.541017	-10.7524	5.77276e-27	1.64021e-25
HNF4G	135.644	-4.10866	0.382286	-10.7476	6.08224e-27	1.72536e-25
HIST1H2AL	174.244	3.88423	0.361483	10.7453	6.23823e-27	1.76676e-25
SLC5A9	51.9111	-3.2144	0.299422	-10.7353	6.94619e-27	1.96411e-25
HSPA2	577.689	-3.82675	0.356506	-10.734	7.04505e-27	1.98887e-25
KIF11	222.444	2.99627	0.279388	10.7244	7.81878e-27	2.20377e-25
MMP14	1295.76	2.30377	0.214901	10.7201	8.18806e-27	2.30417e-25
SHMT1	662.689	-2.33295	0.217819	-10.7105	9.08565e-27	2.55268e-25
TUSC3	588.022	1.69553	0.158314	10.7099	9.14293e-27	2.56468e-25
SDC4	1484.89	-2.70301	0.252464	-10.7065	9.4887e-27	2.65744e-25
RAB11FIP5	305.244	-2.44495	0.22843	-10.7033	9.82576e-27	2.74747e-25
FGF1	184.178	-3.47066	0.32437	-10.6997	1.0212e-26	2.85094e-25
ZRANB3	177.422	1.42006	0.132735	10.6984	1.03535e-26	2.88587e-25
SLC26A4	129.578	-3.73062	0.348735	-10.6976	1.04484e-26	2.90773e-25
AC092653.5	10.6222	-5.36406	0.501777	-10.6901	1.13232e-26	3.1462e-25
SLC7A9	123.489	-3.96907	0.371463	-10.685	1.19669e-26	3.31984e-25
SLC25A30	433.978	-1.9911	0.186451	-10.6789	1.27759e-26	3.53869e-25
PEPD	492.289	-2.12315	0.198859	-10.6767	1.30897e-26	3.61991e-25
AC006159.3	23.1556	-5.25578	0.492358	-10.6747	1.33662e-26	3.69059e-25
GYLTL1B	194.444	-3.84209	0.359968	-10.6734	1.35545e-26	3.73671e-25
CLDN19	180.067	-6.06777	0.569363	-10.6571	1.61515e-26	4.4457e-25
CRISPLD1	190.222	3.36104	0.315385	10.6569	1.61822e-26	4.4472e-25
ARHGEF15	88.5111	-2.03631	0.191097	-10.6559	1.63624e-26	4.48973e-25
ETNK2	161.6	-2.47135	0.232064	-10.6495	1.75373e-26	4.80461e-25
GATM	1860.76	-3.61307	0.339527	-10.6415	1.91082e-26	5.22688e-25
CHDH	499.067	-3.31763	0.311792	-10.6405	1.93053e-26	5.27259e-25
CRYZ	655.2	-2.01461	0.189566	-10.6275	2.22034e-26	6.05473e-25
CD276	354.289	1.72321	0.162224	10.6224	2.34419e-26	6.38256e-25
PROC	30	-4.43779	0.417853	-10.6204	2.39415e-26	6.50854e-25
ACAA2	510.622	-1.52422	0.143563	-10.6171	2.48238e-26	6.73799e-25
DLGAP5	102.978	4.97574	0.469086	10.6073	2.75563e-26	7.46819e-25
CENPK	115.911	2.89654	0.273169	10.6035	2.87174e-26	7.7709e-25
PCDH1	589.578	-2.64261	0.249372	-10.5971	3.07411e-26	8.30576e-25
UGT1A6	138.622	-6.55199	0.618863	-10.5871	3.41928e-26	9.21009e-25
SLC9A3R2	265.4	-1.88526	0.178071	-10.5872	3.4175e-26	9.21009e-25
PDP2	148.289	-1.87963	0.177763	-10.5738	3.94356e-26	1.06061e-24
GDA	381.622	-4.69831	0.444396	-10.5723	4.00339e-26	1.07506e-24
EGOT	98.7111	-3.95706	0.374296	-10.572	4.01781e-26	1.07655e-24
PRSS8	308.778	-4.69952	0.444528	-10.5719	4.02116e-26	1.07655e-24
EPB41L1	765.156	-1.85756	0.175823	-10.5649	4.3329e-26	1.15825e-24
FBXO5	88.3556	2.03917	0.193115	10.5594	4.59783e-26	1.2272e-24
KIAA0101	39.7111	3.34983	0.317278	10.558	4.66309e-26	1.24274e-24
PODXL	2413.31	-2.9547	0.28014	-10.5472	5.23131e-26	1.39206e-24
WDFY3-AS2	107.2	-1.86499	0.176854	-10.5454	5.3367e-26	1.41797e-24
MLF1IP	120.022	3.01986	0.286456	10.5421	5.52264e-26	1.46516e-24
PDZK1IP1	596.156	-6.34132	0.601618	-10.5404	5.62389e-26	1.48978e-24
ACSS1	517.267	-2.08735	0.198047	-10.5397	5.67016e-26	1.49978e-24
PIM3	456.956	-2.44512	0.232083	-10.5355	5.92471e-26	1.56476e-24
MAP1B	1875.11	2.19119	0.208169	10.526	6.55466e-26	1.72855e-24
CX3CL1	230.422	-2.73399	0.259764	-10.5249	6.63248e-26	1.74645e-24
ZNF521	937.267	2.45024	0.232838	10.5234	6.74052e-26	1.77225e-24
SCNN1B	164.311	-5.53092	0.525846	-10.5181	7.1261e-26	1.87084e-24
KCNJ16	2147.64	-5.49938	0.522889	-10.5173	7.19088e-26	1.88504e-24
IMPA2	462.911	-2.75643	0.262296	-10.5089	7.86457e-26	2.05858e-24
IDH2	964.978	-1.97457	0.187988	-10.5037	8.30165e-26	2.16976e-24
ASB9	40.3778	-2.32369	0.221257	-10.5022	8.43796e-26	2.20212e-24
PPAPDC1A	63.9111	-3.50722	0.334044	-10.4993	8.70362e-26	2.26809e-24
HABP4	209.6	-1.55735	0.148338	-10.4987	8.75728e-26	2.2787e-24
CTB-131B5.2	138.578	-2.3813	0.226924	-10.4938	9.22143e-26	2.39594e-24
ANO7P1	18.5778	-3.48927	0.332684	-10.4882	9.78452e-26	2.5385e-24
DMTN	213.289	-2.57847	0.246365	-10.4661	1.23673e-25	3.20385e-24
ZNF519	195.022	2.12694	0.203468	10.4535	1.4128e-25	3.6546e-24
SKA3	55.3111	3.31514	0.317454	10.4429	1.57883e-25	4.07811e-24
SOWAHA	59.1111	-3.93671	0.377073	-10.4402	1.62489e-25	4.19094e-24
CDKL1	455.8	-2.12663	0.203715	-10.4392	1.64142e-25	4.22738e-24
NCAM1	294.956	3.45283	0.331172	10.4261	1.8843e-25	4.84582e-24
MAL	688.622	-5.87986	0.564091	-10.4236	1.93461e-25	4.96795e-24
KIF13B	1375.04	-2.03435	0.195517	-10.405	2.35292e-25	6.03333e-24
ACSF2	890.956	-2.77476	0.266784	-10.4008	2.45939e-25	6.29719e-24
BCL11A	109.711	2.61904	0.251828	10.4001	2.4764e-25	6.33153e-24
SULF1	3138.62	3.47254	0.333943	10.3986	2.51573e-25	6.42278e-24
DISC1	154.578	1.78146	0.171372	10.3953	2.60522e-25	6.64162e-24
KIF18A	87.4667	2.7683	0.266313	10.3949	2.61544e-25	6.65804e-24
CNKSR2	37.3333	4.39025	0.422389	10.3938	2.64467e-25	6.72274e-24
CNDP2	1083.69	-1.66693	0.160384	-10.3933	2.65849e-25	6.74812e-24
SGOL1	49.8222	3.3195	0.319427	10.3921	2.69486e-25	6.83059e-24
MEX3B	95.7556	3.51388	0.338228	10.3891	2.77991e-25	7.03604e-24
CRB3	64.5111	-5.44835	0.524739	-10.383	2.9641e-25	7.49146e-24
NR4A1	3254.84	-3.15404	0.303858	-10.38	3.0586e-25	7.71924e-24
MFAP3L	494.756	-3.18356	0.306811	-10.3763	3.17919e-25	8.0121e-24
RP11-247L20.4	69.8	-2.46296	0.237462	-10.372	3.32451e-25	8.36637e-24
TMEM184A	79.2444	-3.25656	0.314022	-10.3705	3.37847e-25	8.49003e-24
TAL1	59.4889	-1.83595	0.177041	-10.3702	3.38847e-25	8.50304e-24
CENPL	57.6889	1.70448	0.164385	10.3688	3.43676e-25	8.61195e-24
MOGAT1	18.6667	-4.54275	0.43848	-10.3602	3.76112e-25	9.38468e-24
XPNPEP2	500.733	-5.34646	0.516113	-10.3591	3.80535e-25	9.48162e-24
MTND1P23	98.0444	-2.71086	0.262148	-10.3409	4.59961e-25	1.14445e-23
MT-ND3	27797.6	-2.20343	0.213171	-10.3364	4.82241e-25	1.19819e-23
TRO	474.6	1.84145	0.178186	10.3344	4.92341e-25	1.22156e-23
AC114812.9	30.2889	-5.83462	0.564656	-10.333	4.99487e-25	1.23755e-23
PINK1	511.756	-1.26781	0.122734	-10.3298	5.16837e-25	1.27874e-23
RCAN2	326.444	-1.99592	0.193261	-10.3276	5.28626e-25	1.30607e-23
PHYH	184.622	-1.66655	0.161449	-10.3224	5.58072e-25	1.37689e-23
C4orf46	133.156	1.97207	0.19106	10.3217	5.62118e-25	1.38493e-23
C1orf112	205.333	1.68733	0.163489	10.3207	5.67843e-25	1.39708e-23
LINC01071	43.0222	3.94621	0.382402	10.3195	5.74968e-25	1.41264e-23
HIST1H2AG	420.911	3.26292	0.316658	10.3042	6.74166e-25	1.65405e-23
RP11-798K3.2	14.3111	-4.36023	0.423256	-10.3016	6.92765e-25	1.69732e-23
CBR1	184.378	-1.74731	0.169665	-10.2985	7.15326e-25	1.75017e-23
ADRA2B	28.2667	-2.64682	0.257062	-10.2964	7.31527e-25	1.78732e-23
ATAD5	197.822	2.10282	0.20429	10.2933	7.55142e-25	1.84246e-23
GALE	69.9111	-1.65908	0.161428	-10.2776	8.89461e-25	2.16419e-23
CDK18	377.667	-1.64784	0.160359	-10.2759	9.04869e-25	2.19864e-23
SLC25A42	179.911	-2.07309	0.201777	-10.2742	9.2139e-25	2.2357e-23
KANK3	79.2667	-2.31864	0.226087	-10.2555	1.11755e-24	2.70794e-23
C4orf21	267.333	1.71223	0.166995	10.2532	1.1449e-24	2.7704e-23
UGT1A1	20.4889	-5.51176	0.53786	-10.2476	1.21352e-24	2.93187e-23
STK32B	195.156	-3.22035	0.314258	-10.2475	1.21495e-24	2.93187e-23
LZTS3	270.8	-2.39912	0.234178	-10.2449	1.24803e-24	3.00755e-23
GJB1	94.7333	-5.98648	0.584437	-10.2431	1.27032e-24	3.0571e-23
PRKAG2	507.533	-1.52335	0.148781	-10.2389	1.32763e-24	3.19065e-23
TJP3	64.8222	-4.26093	0.41616	-10.2387	1.33029e-24	3.1927e-23
ENPP7P8	41.2	-4.60347	0.449925	-10.2316	1.43092e-24	3.42953e-23
EZH2	380.4	2.37231	0.231931	10.2285	1.47766e-24	3.53675e-23
SHANK3	546.156	-2.17287	0.212456	-10.2274	1.49498e-24	3.57336e-23
PLA2G12B	11.1111	-5.17877	0.506557	-10.2235	1.55683e-24	3.71614e-23
TFAP2B	222.178	-6.8379	0.66926	-10.2171	1.66211e-24	3.96208e-23
PRC1	234.778	2.18782	0.214382	10.2052	1.87854e-24	4.47194e-23
SH2D3A	94.7333	-3.92218	0.384444	-10.2022	1.93797e-24	4.6072e-23
ADIRF	66.4	-4.16578	0.40834	-10.2017	1.94761e-24	4.62387e-23
NUDT16P	34.2222	-2.82163	0.276654	-10.1991	2.00047e-24	4.74298e-23
CKAP2	318.378	2.26905	0.222576	10.1945	2.0987e-24	4.96917e-23
MRPS6	652	-1.7499	0.171672	-10.1933	2.12516e-24	5.02509e-23
HNF1B	754.378	-5.91951	0.581085	-10.187	2.26668e-24	5.35252e-23
FANCA	188.644	2.47183	0.242745	10.1828	2.36565e-24	5.57876e-23
UNC13C	228.889	-4.09153	0.401873	-10.1811	2.40705e-24	5.66879e-23
PCYT2	149.222	-2.23259	0.219593	-10.1669	2.78495e-24	6.55003e-23
SPINK5	205.111	3.37495	0.332122	10.1618	2.93714e-24	6.89875e-23
CRIM1	2727.24	-1.54347	0.151957	-10.1573	3.07538e-24	7.21383e-23
ST3GAL6	308.356	-1.46498	0.144348	-10.1489	3.34949e-24	7.84636e-23
LRPAP1	793.6	-1.04847	0.10335	-10.1448	3.49391e-24	8.17379e-23
TET1	726.933	1.84208	0.181583	10.1445	3.50412e-24	8.1868e-23
RBKS	86.2222	-2.12514	0.209532	-10.1423	3.58512e-24	8.36496e-23
MT-RNR1	108966	-2.34442	0.231402	-10.1314	4.0098e-24	9.34347e-23
ACTR3C	256.444	-2.28057	0.225156	-10.1289	4.11376e-24	9.57304e-23
CLSPN	71.4	2.63423	0.260221	10.1231	4.3659e-24	1.01464e-22
COBL	400.6	-3.50452	0.346263	-10.121	4.45906e-24	1.03492e-22
PDK2	476.422	-1.49115	0.147383	-10.1175	4.62046e-24	1.07098e-22
KIAA1191	821.889	-1.17937	0.116648	-10.1104	4.96661e-24	1.1497e-22
GINS4	62.3333	2.33726	0.231436	10.099	5.58349e-24	1.28921e-22
CDON	544.622	2.7293	0.270256	10.0989	5.58395e-24	1.28921e-22
CBLC	32.0889	-4.71837	0.467224	-10.0987	5.59658e-24	1.29044e-22
PLK4	93.8222	2.39248	0.236931	10.0978	5.64955e-24	1.30095e-22
TDGF1	41.6444	-5.39551	0.534395	-10.0965	5.72578e-24	1.31678e-22
RP5-1018K9.1	8.66667	-5.4854	0.543673	-10.0895	6.1468e-24	1.41176e-22
FZD10	74.4444	4.37043	0.433222	10.0882	6.23064e-24	1.42915e-22
CDKL2	177.978	-3.13559	0.310866	-10.0866	6.32986e-24	1.44814e-22
SLC25A48	49.2667	-5.38846	0.534214	-10.0867	6.32603e-24	1.44814e-22
FMO4	225.356	-2.31532	0.229668	-10.0812	6.6924e-24	1.5291e-22
TENM4	646.956	2.14322	0.212611	10.0805	6.73918e-24	1.53779e-22
AGTR1	127.644	-3.78752	0.375895	-10.076	7.05308e-24	1.60734e-22
BMPER	156.889	3.62005	0.359288	10.0756	7.0815e-24	1.61173e-22
RPS19	687.067	1.31922	0.130978	10.0721	7.33962e-24	1.66832e-22
SMIM6	11.0667	-5.07837	0.504262	-10.0709	7.4297e-24	1.68662e-22
SERPINF2	192.467	-4.11613	0.408991	-10.0641	7.96112e-24	1.80493e-22
SDK2	204.444	2.48455	0.247091	10.0552	8.71337e-24	1.97294e-22
FAAH	154.156	-2.18983	0.218056	-10.0425	9.91149e-24	2.24134e-22
FAM65C	440.956	-3.56427	0.35514	-10.0362	1.05623e-23	2.38545e-22
MYBL1	83.7333	1.60556	0.160083	10.0295	1.13062e-23	2.55018e-22
MAP3K15	100.956	-4.58102	0.456988	-10.0244	1.19089e-23	2.68269e-22
TNS4	47.7556	-4.18189	0.417384	-10.0193	1.25418e-23	2.82166e-22
C1orf210	48.0667	-4.61643	0.461127	-10.0112	1.36113e-23	3.05837e-22
KIAA1524	221.244	1.67138	0.167008	10.0078	1.40872e-23	3.16127e-22
RP11-66B24.5	10.7778	-5.22118	0.521736	-10.0073	1.41533e-23	3.17207e-22
MUC20	593.622	-2.82414	0.282393	-10.0007	1.51253e-23	3.38562e-22
TMEM139	83.2889	-3.69679	0.369943	-9.99286	1.63784e-23	3.66145e-22
GDF15	334.222	-3.45528	0.345835	-9.99112	1.66687e-23	3.72163e-22
CHN1	205.489	1.97719	0.197924	9.98961	1.69242e-23	3.77388e-22
PHF14	1187.13	1.10935	0.111145	9.98104	1.84524e-23	4.10681e-22
TOLLIP	352.689	-1.29802	0.13005	-9.98098	1.84638e-23	4.10681e-22
WWC2	1112.49	-1.27843	0.128162	-9.97506	1.95989e-23	4.35378e-22
GRB14	378.022	-4.20289	0.421482	-9.97171	2.02704e-23	4.49727e-22
CDK1	147.044	2.79105	0.279938	9.97024	2.05727e-23	4.5586e-22
ACOT12	20.1556	-3.28678	0.329722	-9.96834	2.09701e-23	4.64081e-22
LIMS2	228.756	-2.27703	0.228586	-9.96136	2.24957e-23	4.96597e-22
TMEM171	40.9778	-3.85478	0.387652	-9.94391	2.68104e-23	5.90366e-22
BASP1	204.8	1.77686	0.178697	9.94345	2.69342e-23	5.92351e-22
HPCAL1	247.756	-1.3177	0.132534	-9.94239	2.7221e-23	5.97911e-22
VTCN1	79.6444	-3.48515	0.350797	-9.93494	2.93342e-23	6.43526e-22
SMTNL2	237.156	-3.79869	0.382394	-9.93398	2.96188e-23	6.48961e-22
RP5-857K21.11	261.333	-2.55681	0.2574	-9.93322	2.98456e-23	6.53119e-22
ACOT2	118.022	-1.54212	0.155272	-9.93174	3.02915e-23	6.62054e-22
GGACT	55.7333	-2.26481	0.228126	-9.92789	3.14834e-23	6.8725e-22
MELK	85.0889	4.18398	0.421605	9.92394	3.27573e-23	7.14174e-22
COQ9	332.6	-1.53871	0.155091	-9.92132	3.36266e-23	7.3222e-22
GATA3-AS1	17.9111	-4.68151	0.471985	-9.91878	3.44931e-23	7.49235e-22
EVPL	312.533	-3.79462	0.382567	-9.91883	3.44786e-23	7.49235e-22
ALS2CL	399.444	-3.10679	0.31336	-9.91445	3.60246e-23	7.81539e-22
SHROOM4	55.5778	-1.56021	0.157396	-9.91266	3.66755e-23	7.94681e-22
GALNT18	288.667	-1.87602	0.189307	-9.90994	3.76872e-23	8.156e-22
TUBA1A	1167.67	2.4682	0.249144	9.90674	3.89151e-23	8.41139e-22
ARHGEF10L	914.822	-2.10119	0.212112	-9.90605	3.91851e-23	8.45937e-22
RASIP1	104.378	-1.8633	0.188102	-9.90578	3.9289e-23	8.47142e-22
AC156455.1	35.6889	2.50489	0.252955	9.90248	4.06072e-23	8.74495e-22
CCNI2	38.8	-3.93516	0.397436	-9.90138	4.10554e-23	8.83066e-22
CDIP1	202.911	-1.48123	0.149633	-9.89911	4.20011e-23	9.02306e-22
LURAP1	52.7778	-2.37286	0.239749	-9.89723	4.27979e-23	9.18304e-22
ETFDH	405.467	-1.15338	0.116543	-9.89662	4.30562e-23	9.22722e-22
MTND5P11	429.822	-2.39118	0.241661	-9.89477	4.38627e-23	9.38863e-22
UGT1A4	30.2444	-6.2965	0.636556	-9.89151	4.5315e-23	9.68773e-22
TRPM4	234.267	-1.89033	0.191185	-9.88746	4.71845e-23	1.00752e-21
FABP3	168.356	-3.16889	0.320531	-9.88638	4.76982e-23	1.01725e-21
AC112229.7	30.9333	-3.16833	0.320535	-9.88453	4.85876e-23	1.03497e-21
WWC1	727.756	-3.02436	0.306174	-9.87791	5.19056e-23	1.10431e-21
GCNT2	369.267	-2.30645	0.233553	-9.87547	5.31839e-23	1.13014e-21
MTND4P12	1690.71	-2.2402	0.226875	-9.87415	5.3889e-23	1.14375e-21
RP11-96D1.11	63.1556	-3.13015	0.317071	-9.87207	5.50162e-23	1.16626e-21
FA2H	34.9778	-5.22296	0.52909	-9.87159	5.52819e-23	1.17049e-21
CENPJ	314.8	1.63514	0.165672	9.8697	5.63305e-23	1.19126e-21
MLLT11	67	2.74523	0.278164	9.86912	5.66611e-23	1.19681e-21
RAB11FIP3	1729.49	-2.42975	0.246243	-9.86728	5.77083e-23	1.21747e-21
LMTK3	27.1556	-3.59956	0.364926	-9.86381	5.97378e-23	1.25878e-21
SLC2A11	432.067	-1.74816	0.177261	-9.86206	6.07894e-23	1.27941e-21
CENPW	51.4667	2.78799	0.282774	9.8594	6.24225e-23	1.31221e-21
GRHL1	108.333	-2.29235	0.232762	-9.84848	6.95891e-23	1.46112e-21
ACSL1	1399.11	-2.32589	0.236259	-9.84464	7.22986e-23	1.51621e-21
CCDC24	61.3778	-2.00818	0.204024	-9.84288	7.35754e-23	1.53932e-21
RP11-352D13.6	54.5111	-7.23582	0.735128	-9.84294	7.35269e-23	1.53932e-21
BAG1	388.178	-1.53378	0.155858	-9.84085	7.50727e-23	1.56878e-21
POSTN	1938.69	3.66904	0.372975	9.83723	7.78218e-23	1.6243e-21
PPARGC1A	2600.11	-3.64743	0.3709	-9.834	8.03641e-23	1.67538e-21
MMRN2	270.6	-1.81768	0.184869	-9.8323	8.17329e-23	1.7019e-21
ECI2	502.911	-1.46153	0.148677	-9.83026	8.33994e-23	1.73455e-21
C10orf62	17.7333	-4.68376	0.476783	-9.82366	8.90474e-23	1.84983e-21
RGN	58.0667	-3.63041	0.369593	-9.82271	8.98931e-23	1.8652e-21
FANCB	57.2444	2.38361	0.242685	9.82184	9.06763e-23	1.87924e-21
GLIPR1	447.822	2.37752	0.24207	9.8216	9.08849e-23	1.88135e-21
IRF6	195.111	-3.86665	0.393734	-9.82047	9.19161e-23	1.90046e-21
RP11-346I3.4	58.2444	-2.38396	0.24279	-9.81902	9.32439e-23	1.92566e-21
MARVELD1	207.111	2.06946	0.210803	9.81706	9.50725e-23	1.96112e-21
ALAD	397.111	-1.50329	0.153163	-9.81496	9.70788e-23	2.00016e-21
PRKAA2	1057.4	-2.09065	0.213081	-9.81154	1.00426e-22	2.06672e-21
RAB25	57.6222	-4.27742	0.436064	-9.80918	1.02802e-22	2.11315e-21
NAT8L	167.756	-3.12832	0.319062	-9.80471	1.07454e-22	2.20618e-21
RP11-379F12.4	22.2	-6.10399	0.622796	-9.80094	1.1154e-22	2.28741e-21
PVT1	141.333	3.14466	0.321229	9.78944	1.24988e-22	2.56023e-21
SULT1C2P1	45.8222	-3.92195	0.400789	-9.78558	1.29854e-22	2.65681e-21
RP11-61L19.2	15.1556	-5.26473	0.538328	-9.77979	1.37496e-22	2.80989e-21
RP11-253M7.6	16	-4.71224	0.481921	-9.77804	1.39895e-22	2.8556e-21
MACC1	782.422	-3.85336	0.394102	-9.77759	1.40522e-22	2.86508e-21
CCDC14	1609.76	1.13936	0.116559	9.775	1.44164e-22	2.93594e-21
FZD2	98.7778	2.67513	0.274079	9.76046	1.66398e-22	3.38483e-21
IVNS1ABP	4225.51	-1.43357	0.146911	-9.75812	1.70275e-22	3.4597e-21
GLRX	185.2	-2.00424	0.20564	-9.74632	1.91268e-22	3.88176e-21
ASS1	1212.71	-4.28383	0.439752	-9.74147	2.00639e-22	4.06726e-21
SLC6A8	219.733	-2.16402	0.222163	-9.74065	2.02263e-22	4.09547e-21
NRP2	604.022	2.04721	0.21025	9.73705	2.09556e-22	4.23827e-21
NEIL3	33.2667	3.85385	0.396242	9.726	2.33594e-22	4.71903e-21
MME	1614.04	-4.68164	0.481465	-9.72374	2.38852e-22	4.81971e-21
RP11-397G17.1	16.8667	-6.14819	0.632297	-9.72357	2.39237e-22	4.82196e-21
ADAMTS9-AS2	652.4	-2.29427	0.236051	-9.71936	2.49352e-22	5.02009e-21
CCDC136	109.333	2.56208	0.263617	9.71897	2.50311e-22	5.03366e-21
FZD7	617.733	2.403	0.247281	9.71768	2.53497e-22	5.09191e-21
AGPAT3	876.867	-1.11776	0.115109	-9.71041	2.72244e-22	5.46225e-21
AC069213.1	94.6889	-3.44389	0.354839	-9.70553	2.85598e-22	5.71716e-21
FADS2	373.844	1.7111	0.176387	9.70081	2.99109e-22	5.98083e-21
CLUHP3	264.022	-1.52005	0.156743	-9.69776	3.0818e-22	6.15521e-21
SGOL2	89.3333	1.64594	0.16974	9.69684	3.10984e-22	6.20419e-21
GAS5	660.089	1.40172	0.144655	9.69006	3.32329e-22	6.61504e-21
ACADL	176.6	-5.10375	0.526696	-9.69013	3.32105e-22	6.61504e-21
RP11-521M14.1	7.53333	-5.39412	0.556758	-9.68844	3.3765e-22	6.7058e-21
DTNA	512.733	2.24157	0.231406	9.68673	3.43335e-22	6.81102e-21
UTP20	735.244	1.08667	0.112368	9.67061	4.0199e-22	7.95669e-21
ARSE	113.733	-3.58862	0.371084	-9.67063	4.01885e-22	7.95669e-21
C1orf132	830.489	-1.66662	0.172395	-9.66746	4.14546e-22	8.19601e-21
SLC1A4	89.4222	1.78676	0.184992	9.65858	4.52086e-22	8.92818e-21
NCAPG2	287.311	1.62772	0.168594	9.65466	4.69698e-22	9.26563e-21
OPLAH	122.289	-2.82096	0.292193	-9.65444	4.70728e-22	9.27555e-21
CHEK1	120.156	2.00485	0.207778	9.64899	4.96406e-22	9.7706e-21
EVC	2123.6	-1.75543	0.181991	-9.64567	5.12746e-22	1.0081e-20
STARD8	328.222	-2.11499	0.219317	-9.6435	5.23736e-22	1.02855e-20
TIE1	233.622	-1.62237	0.168255	-9.64232	5.29757e-22	1.03894e-20
GLTP	356.222	-1.39251	0.144418	-9.64224	5.30202e-22	1.03894e-20
TUBB	317.511	1.90341	0.197425	9.64117	5.35723e-22	1.04859e-20
COL5A1	2442.8	2.74117	0.284351	9.64007	5.41501e-22	1.05872e-20
ANKRD13B	56.6222	2.17148	0.225273	9.63935	5.45327e-22	1.06502e-20
LAD1	128	-2.93166	0.304411	-9.6306	5.93834e-22	1.15847e-20
HOOK2	383.178	-1.72043	0.178644	-9.63047	5.94597e-22	1.15867e-20
DAK	251.689	-1.59889	0.166032	-9.63003	5.97125e-22	1.16231e-20
SLC9A3R1	294.378	-2.10788	0.218937	-9.62779	6.10255e-22	1.18656e-20
NOS3	101.422	-1.95569	0.203151	-9.62681	6.16135e-22	1.19667e-20
COL6A3	8907.47	2.79177	0.290046	9.62527	6.25452e-22	1.21343e-20
HIST1H2AB	128.467	2.8336	0.294674	9.61605	6.84093e-22	1.32574e-20
ECI1	192.511	-1.49812	0.155936	-9.6073	7.44783e-22	1.44177e-20
FMO5	66.7111	-2.59193	0.269835	-9.60561	7.57076e-22	1.46396e-20
RP4-655J12.4	104.822	-4.32235	0.450046	-9.60424	7.67219e-22	1.48194e-20
CENPI	69.8889	2.66835	0.278054	9.59653	8.26817e-22	1.59531e-20
ACADVL	1273.84	-1.27107	0.132475	-9.59477	8.41038e-22	1.62098e-20
HRSP12	173.733	-2.575	0.268395	-9.59409	8.46631e-22	1.62997e-20
TUBA4A	141.533	-2.7325	0.28492	-9.59041	8.77315e-22	1.6872e-20
RCAN1	804.067	-2.43632	0.254116	-9.58744	9.02933e-22	1.73458e-20
PDCD4	862.067	1.06964	0.111574	9.5868	9.08606e-22	1.74357e-20
NOTCH4	194.422	-1.97171	0.205831	-9.57924	9.77589e-22	1.87391e-20
FANCD2	218.356	2.04575	0.213597	9.57763	9.9302e-22	1.90142e-20
LGSN	47.6222	-5.42857	0.566953	-9.575	1.01854e-21	1.94817e-20
SLC10A2	29.8222	-6.15786	0.643319	-9.57201	1.04842e-21	2.00314e-20
GPR137C	119.933	2.40401	0.251155	9.57179	1.05074e-21	2.00483e-20
CDC6	57.6889	2.98063	0.3114	9.5717	1.05158e-21	2.00483e-20
CKB	583.044	-2.66692	0.278686	-9.56961	1.07305e-21	2.04355e-20
CHL1	387.667	-3.6741	0.384017	-9.56755	1.09474e-21	2.0826e-20
CLUH	638.356	-1.94407	0.203355	-9.55995	1.17809e-21	2.23875e-20
PNPLA3	96.0444	-3.78448	0.395875	-9.55978	1.18008e-21	2.24012e-20
RP1-90J20.11	84.8	-2.4377	0.255085	-9.55643	1.21893e-21	2.31137e-20
RP11-586K2.1	15.7556	4.71844	0.493827	9.55486	1.23755e-21	2.34415e-20
PCK2	326.378	-2.63154	0.275536	-9.55064	1.28901e-21	2.439e-20
RP11-297D21.2	12.0444	-4.16574	0.436239	-9.54922	1.3068e-21	2.47002e-20
MST1	227.222	-2.06838	0.216613	-9.54873	1.313e-21	2.47908e-20
FKBP7	148.333	1.92047	0.201392	9.53598	1.4847e-21	2.80027e-20
PDGFB	237.867	-1.87599	0.196756	-9.53459	1.50478e-21	2.8351e-20
MT1F	108.933	-3.74426	0.392876	-9.53039	1.56696e-21	2.9491e-20
FIGNL1	164.867	1.64581	0.1728	9.52434	1.66097e-21	3.12269e-20
WNK2	275.333	2.58177	0.271088	9.52376	1.67025e-21	3.13679e-20
MOCS1	204.578	-1.65726	0.174021	-9.52331	1.67749e-21	3.14704e-20
SLC25A10	104.6	-2.3214	0.243769	-9.52292	1.68379e-21	3.1555e-20
CPEB3	341.844	-1.68546	0.177032	-9.52063	1.72134e-21	3.22244e-20
NPY5R	32.2667	-4.03215	0.423532	-9.52031	1.72659e-21	3.22884e-20
MIS18BP1	482.667	1.48921	0.156495	9.51606	1.79877e-21	3.36025e-20
AC079602.1	148.756	-5.28342	0.555383	-9.51311	1.85045e-21	3.45312e-20
GNL3	359.6	1.05156	0.110541	9.51286	1.85498e-21	3.45792e-20
SIGIRR	130.022	-2.15459	0.22652	-9.51173	1.87518e-21	3.49187e-20
TCTA	151.978	-1.08517	0.114195	-9.50273	2.04455e-21	3.80325e-20
CCNB1	136.756	2.23462	0.235199	9.50095	2.07979e-21	3.86473e-20
TBL1XR1	3175.73	1.14523	0.120586	9.49717	2.15679e-21	4.00358e-20
CAT	1014.6	-1.27542	0.134307	-9.49637	2.1734e-21	4.03017e-20
OXCT1	454.956	-1.59227	0.167708	-9.49429	2.21724e-21	4.10715e-20
CDC42BPG	121.489	-2.7542	0.290207	-9.49046	2.30013e-21	4.25621e-20
SNX29	1257.56	-1.59012	0.167558	-9.48999	2.31054e-21	4.27099e-20
USP53	1411.36	-1.51195	0.159441	-9.4828	2.4755e-21	4.56155e-20
AC026150.5	29.5111	4.20817	0.443766	9.48287	2.47392e-21	4.56155e-20
ZHX3	922.733	-1.74693	0.184238	-9.48193	2.49633e-21	4.59513e-20
ALDH1L1-AS2	10.2	-4.75294	0.50141	-9.47914	2.56381e-21	4.71442e-20
MDGA2	62.2889	2.53372	0.267368	9.47655	2.62825e-21	4.82787e-20
CASC15	1117.31	2.34403	0.247704	9.46301	2.99213e-21	5.49055e-20
MTBP	150.044	1.86323	0.196906	9.46254	3.00565e-21	5.50962e-20
FAP	297.8	3.85965	0.407963	9.46078	3.0564e-21	5.59684e-20
AGPAT2	141.089	-1.46511	0.154895	-9.45873	3.11708e-21	5.70203e-20
HAGH	180.956	-1.84421	0.194998	-9.45756	3.15199e-21	5.7599e-20
OPA3	248.689	-1.26883	0.134183	-9.45599	3.19982e-21	5.84125e-20
MCM6	330.556	1.53319	0.162185	9.45336	3.28135e-21	5.98388e-20
RPLP0	4275.04	1.32818	0.140522	9.45179	3.33084e-21	6.06784e-20
PARD6B	847.667	-3.02985	0.320612	-9.45021	3.38163e-21	6.154e-20
RDH13	25.7333	-1.86825	0.197755	-9.44728	3.47765e-21	6.32221e-20
ZMAT4	54.7333	3.59386	0.380483	9.44551	3.53671e-21	6.42296e-20
OVOL1	87.4667	-4.53543	0.480409	-9.44077	3.70057e-21	6.71362e-20
SLC5A1	40.2444	-4.6659	0.494607	-9.43356	3.96389e-21	7.18394e-20
MACROD1	79.6667	-2.20278	0.233522	-9.43286	3.99051e-21	7.22474e-20
MPP7	350.911	-2.16521	0.229572	-9.43151	4.04239e-21	7.31117e-20
PITPNM2	392.267	-1.6828	0.178581	-9.42317	4.3768e-21	7.90787e-20
RP11-352D13.5	10.0444	-4.71503	0.500464	-9.42132	4.45455e-21	8.04009e-20
C1orf116	99.8222	-4.64177	0.492763	-9.41988	4.5159e-21	8.14249e-20
SLC25A1	97.2889	-1.5653	0.16626	-9.41477	4.74097e-21	8.53956e-20
TPRN	61.5778	-1.64805	0.175088	-9.41268	4.83642e-21	8.70259e-20
ABTB2	283.111	-2.1593	0.229418	-9.41206	4.86528e-21	8.74559e-20
TTYH2	157.133	2.06508	0.219466	9.40954	4.98322e-21	8.94845e-20
NPY6R	47.0667	-4.22355	0.448978	-9.40703	5.10343e-21	9.15499e-20
ROR2	263.333	2.36716	0.251646	9.40673	5.11828e-21	9.17229e-20
RP11-231E6.1	51.8889	-4.71183	0.501	-9.40485	5.21064e-21	9.32831e-20
SYNE2	13975.8	-1.60329	0.170527	-9.402	5.35352e-21	9.57437e-20
PLCH2	108.889	-3.50011	0.372402	-9.39876	5.52074e-21	9.86342e-20
RAD51	19.2	2.78442	0.29634	9.39603	5.66622e-21	1.01131e-19
CYP8B1	20.2222	-4.72442	0.502893	-9.39448	5.74994e-21	1.02521e-19
BAIAP2	398.244	-2.05307	0.218555	-9.39386	5.78435e-21	1.0303e-19
RANBP3L	374.911	-3.66839	0.390644	-9.39062	5.965e-21	1.06141e-19
SLC22A5	576.244	-1.79437	0.191234	-9.38311	6.40525e-21	1.1386e-19
VANGL2	358.644	1.56404	0.166824	9.37539	6.89233e-21	1.22394e-19
SLC38A11	159.444	-3.18505	0.340044	-9.3666	7.49064e-21	1.32885e-19
DHTKD1	499.156	-1.18787	0.126825	-9.36616	7.52214e-21	1.3331e-19
TMC4	136.6	-3.1867	0.340323	-9.36376	7.69512e-21	1.36238e-19
XRCC2	90.9111	2.6523	0.283263	9.3634	7.72094e-21	1.36558e-19
NFATC4	242.511	1.50255	0.160527	9.3601	7.96631e-21	1.40757e-19
UBE2T	50.5556	3.05228	0.326377	9.35202	8.59871e-21	1.51778e-19
CA4	51.8889	-3.47342	0.371431	-9.35145	8.64531e-21	1.52448e-19
ORC6	48.5111	2.59532	0.277799	9.34241	9.41653e-21	1.65882e-19
RP5-857K21.7	122.422	-2.42535	0.25963	-9.34155	9.49333e-21	1.67067e-19
ASAP1	1319.24	1.21104	0.129694	9.33768	9.84638e-21	1.73108e-19
GAS7	305.289	2.25641	0.241794	9.33196	1.03935e-20	1.82545e-19
ACOT11	696.644	-1.95899	0.209931	-9.3316	1.04285e-20	1.82976e-19
UGT1A2P	19.0667	-5.64914	0.605602	-9.32813	1.07751e-20	1.8887e-19
F2RL1	187.933	-3.21876	0.345561	-9.31458	1.22439e-20	2.14402e-19
ZMYND12	30.0222	-2.14547	0.230416	-9.31126	1.26331e-20	2.20997e-19
TOB1	731	-1.85259	0.198999	-9.30957	1.28357e-20	2.24319e-19
ZNF280B	65.8444	2.52256	0.271095	9.30506	1.33923e-20	2.33814e-19
CCDC148	263.844	-2.72509	0.292941	-9.30249	1.3719e-20	2.39281e-19
BRCA2	260.644	2.33489	0.251095	9.29881	1.42027e-20	2.47473e-19
RAD18	208.356	1.41487	0.152238	9.29382	1.48849e-20	2.59104e-19
NTM	190.356	2.61626	0.281513	9.29357	1.49203e-20	2.59462e-19
PABPC1	5485.04	1.07975	0.116288	9.28514	1.61489e-20	2.80551e-19
LINC00379	10.0444	-4.84108	0.52158	-9.28157	1.67005e-20	2.89849e-19
PBK	42.6222	4.24648	0.457736	9.27715	1.74079e-20	3.01828e-19
ST8SIA4	205.422	2.40542	0.259329	9.27555	1.76711e-20	3.06091e-19
RAB3IP	1030.71	-2.26981	0.244727	-9.27486	1.77845e-20	3.07753e-19
DEPDC7	71.4222	-2.14062	0.230839	-9.27323	1.80597e-20	3.12208e-19
ENPP6	181.356	-5.10057	0.550246	-9.26962	1.86809e-20	3.2263e-19
SDHA	755	-1.13037	0.121958	-9.26854	1.88713e-20	3.256e-19
AC003984.1	17.8889	-5.01603	0.541229	-9.26786	1.89922e-20	3.27365e-19
MCCD1	9.17778	-5.86224	0.63277	-9.26442	1.96142e-20	3.37756e-19
LPIN3	207.133	-2.81493	0.304277	-9.2512	2.21981e-20	3.81876e-19
TIAM1	341.644	2.03516	0.219998	9.25083	2.22755e-20	3.82834e-19
CLEC3B	29.8667	-2.83639	0.306904	-9.24195	2.42046e-20	4.15583e-19
LINC01055	10.5778	-5.35856	0.579896	-9.24056	2.45199e-20	4.20588e-19
PRR26	49	-2.69378	0.291777	-9.23231	2.64855e-20	4.5386e-19
RNF217	791.156	1.63993	0.177692	9.22907	2.72997e-20	4.67357e-19
CTD-2008P7.9	48.3778	-5.27183	0.57161	-9.22279	2.89473e-20	4.95083e-19
RCN1	582.222	1.22954	0.133332	9.22165	2.92573e-20	4.999e-19
PIANP	36.1333	3.52663	0.382617	9.21713	3.05145e-20	5.20875e-19
NR3C2	822.867	-2.3542	0.25551	-9.21374	3.14946e-20	5.37084e-19
PRKAB1	597.778	-1.60833	0.174746	-9.20385	3.4535e-20	5.88364e-19
NOTCH2	3632.36	1.42404	0.154745	9.20248	3.49774e-20	5.95326e-19
SMARCD3	208.022	1.41535	0.153967	9.19258	3.83524e-20	6.52139e-19
ANKRD24	37.2889	-2.67718	0.291256	-9.19185	3.86129e-20	6.55935e-19
IL1RL2	50.8667	-3.02153	0.328747	-9.19104	3.89067e-20	6.60289e-19
MCM2	214.733	2.05957	0.224131	9.18911	3.96107e-20	6.71591e-19
SLC26A6	253.311	-2.11126	0.229792	-9.18772	4.01255e-20	6.79665e-19
CES2	330.089	-1.56133	0.169992	-9.18473	4.12578e-20	6.98172e-19
SMIM2	20.2222	3.604	0.392396	9.1846	4.13065e-20	6.98325e-19
CDCA8	30.2222	2.87269	0.312815	9.18334	4.17924e-20	7.05862e-19
SYT11	302.578	1.67754	0.182694	9.18222	4.22285e-20	7.12544e-19
OXER1	59.9778	-3.13074	0.341048	-9.17976	4.3204e-20	7.28309e-19
FER1L6	66.7778	-4.60628	0.501967	-9.17645	4.45536e-20	7.49625e-19
CPEB2	755.844	-2.09034	0.2278	-9.1762	4.46586e-20	7.50674e-19
PPP1R16B	251.578	-2.85247	0.311003	-9.17184	4.65014e-20	7.80161e-19
RP11-6B4.1	15.6	-5.78885	0.63119	-9.17132	4.67243e-20	7.83154e-19
ZNF280C	223.844	1.3289	0.144899	9.1712	4.67783e-20	7.83314e-19
ZNF385B	138.244	-2.78349	0.303551	-9.16977	4.74036e-20	7.93031e-19
KIF20B	274.156	1.43436	0.156457	9.16775	4.83015e-20	8.07286e-19
CHD5	20.2	-3.12497	0.340977	-9.16474	4.96645e-20	8.29279e-19
RP11-750B16.1	92.6889	-2.61504	0.285378	-9.16341	5.02822e-20	8.38798e-19
GCM1	15.5111	-5.07515	0.554026	-9.16049	5.16626e-20	8.61011e-19
COLGALT2	166	3.01515	0.329291	9.15648	5.36168e-20	8.92735e-19
ABCA1	2244.53	1.70615	0.186356	9.15533	5.41927e-20	9.01472e-19
DMRT2	221.778	-6.19858	0.677149	-9.15394	5.48961e-20	9.12311e-19
RP11-390N6.1	16.2889	-5.13635	0.561251	-9.1516	5.60984e-20	9.31414e-19
RP11-704M14.1	27.6222	-4.99571	0.546049	-9.14883	5.75514e-20	9.54637e-19
HMX2	7.77778	-5.59667	0.611841	-9.14727	5.83924e-20	9.67677e-19
HIST1H3C	462.578	2.86007	0.312778	9.1441	6.0126e-20	9.9547e-19
HYAL1	17.6667	-3.64383	0.398509	-9.14366	6.03745e-20	9.98645e-19
CBX7	239.822	-1.67452	0.183339	-9.13345	6.63518e-20	1.09649e-18
SH3PXD2A	1327.64	1.50172	0.164432	9.13278	6.67622e-20	1.10223e-18
SLC39A4	65.7333	-2.29845	0.251828	-9.12703	7.04042e-20	1.16127e-18
CBX1	410.244	1.06735	0.116948	9.12668	7.06342e-20	1.16398e-18
TMEM51-AS1	66.6222	-2.08273	0.22823	-9.12558	7.13518e-20	1.1747e-18
SIMC1	194.222	1.06125	0.116363	9.12017	7.5007e-20	1.23373e-18
TMEM51	214.422	-2.12353	0.232944	-9.11604	7.79197e-20	1.28044e-18
LRP4	402.644	2.15403	0.236313	9.11517	7.85462e-20	1.28953e-18
BCAT1	561.289	2.59312	0.284536	9.1135	7.97658e-20	1.30834e-18
SH3GL2	45.3111	-3.42089	0.375394	-9.1128	8.02853e-20	1.31563e-18
RP11-736E3.1	6.11111	-5.07235	0.556657	-9.11216	8.0759e-20	1.32217e-18
TMEM194A	492.422	1.39322	0.152899	9.11201	8.08702e-20	1.32276e-18
TPPP	78.8889	-2.86351	0.314382	-9.1084	8.36087e-20	1.36628e-18
ZFP69B	26.7333	2.23016	0.244927	9.1054	8.59491e-20	1.40193e-18
XKR5	37.6889	4.03927	0.443612	9.10541	8.59376e-20	1.40193e-18
IL17RB	269.689	-2.80005	0.30756	-9.10406	8.70182e-20	1.41674e-18
COLCA1	199.933	-2.76098	0.303267	-9.10414	8.69533e-20	1.41674e-18
HIST1H2AK	86.9778	2.23744	0.245773	9.10368	8.73214e-20	1.42036e-18
RP11-325F22.5	91.2	-4.25878	0.467864	-9.10261	8.81841e-20	1.43307e-18
GLIPR2	123.289	2.20774	0.242588	9.10075	8.9709e-20	1.45651e-18
BCL2L1	507.422	-1.3532	0.148758	-9.09671	9.31087e-20	1.51032e-18
EHF	526.378	-3.79558	0.417414	-9.0931	9.62569e-20	1.55995e-18
C10orf126	19.8222	-4.60753	0.507017	-9.08753	1.01317e-19	1.64044e-18
AC006126.4	23	-2.87478	0.316391	-9.08616	1.02597e-19	1.65965e-18
AP1M2	113.956	-4.12541	0.45404	-9.08601	1.02739e-19	1.66041e-18
LINC00885	17.0667	-4.16233	0.458308	-9.08195	1.06645e-19	1.72103e-18
CENPH	43.7111	2.09754	0.230958	9.08191	1.06685e-19	1.72103e-18
ATPIF1	413.044	-1.44936	0.159592	-9.08166	1.06936e-19	1.7235e-18
RP11-933H2.4	68.8444	-2.03906	0.224796	-9.07073	1.18223e-19	1.90193e-18
PARPBP	91.8	2.73548	0.301569	9.07083	1.18118e-19	1.90193e-18
IL17RD	1303.47	2.30067	0.253671	9.06949	1.19578e-19	1.92023e-18
ISOC2	116.444	-1.36778	0.150889	-9.0648	1.24836e-19	2.00283e-18
ARL4D	63.7556	-2.18008	0.240531	-9.06363	1.26183e-19	2.0226e-18
GALM	260.644	-1.71652	0.189419	-9.06207	1.28e-19	2.04987e-18
SPC25	24.0222	4.09445	0.451949	9.05954	1.30997e-19	2.09595e-18
SYT13	147	-2.72278	0.300626	-9.05704	1.34042e-19	2.14273e-18
SMC4	815.222	1.53484	0.169477	9.05629	1.3496e-19	2.15544e-18
BSPRY	61.7111	-4.02243	0.444176	-9.05595	1.35388e-19	2.16032e-18
DPYSL3	717.689	2.55374	0.282143	9.05122	1.41377e-19	2.25384e-18
EGFL7	193.8	-1.95108	0.215571	-9.05072	1.42027e-19	2.26215e-18
WDHD1	156.044	1.66964	0.184494	9.04985	1.43169e-19	2.27829e-18
RNF128	83.2667	-4.05854	0.44853	-9.04854	1.44899e-19	2.30373e-18
PANK1	260.556	-1.70564	0.188638	-9.04182	1.54084e-19	2.44536e-18
FAM131C	13.4	-4.65099	0.514624	-9.03765	1.60073e-19	2.53812e-18
ABAT	643.822	-2.09737	0.232095	-9.03669	1.61482e-19	2.55815e-18
FZD10-AS1	153.956	4.99478	0.552766	9.03598	1.62538e-19	2.57256e-18
TOB2	659.111	-1.02491	0.113453	-9.03376	1.65873e-19	2.623e-18
C11orf82	27.1778	2.65832	0.294411	9.02928	1.72811e-19	2.73026e-18
RP4-543J13.1	8.82222	-5.6268	0.623632	-9.02263	1.83633e-19	2.89863e-18
LDLRAD4	746.244	1.57965	0.175207	9.01591	1.95237e-19	3.07905e-18
TMEM125	35.9333	-3.63145	0.40279	-9.01574	1.95547e-19	3.08118e-18
RP11-279F6.1	66.4889	-3.1198	0.3463	-9.00894	2.08057e-19	3.27536e-18
OSR1	90.4889	2.86877	0.318556	9.00555	2.14597e-19	3.3753e-18
ABHD14B	161	-1.2527	0.139144	-9.00291	2.19822e-19	3.4544e-18
ASPA	376.711	-3.8586	0.428744	-8.99979	2.26148e-19	3.55064e-18
AP000322.53	17.6444	-5.03346	0.55952	-8.99604	2.34012e-19	3.67085e-18
C6orf223	15.9111	-3.96752	0.441334	-8.98983	2.47607e-19	3.88064e-18
SKP2	257.067	1.60516	0.17862	8.98645	2.55335e-19	3.99821e-18
ADAM12	591.467	3.02348	0.336661	8.98077	2.68872e-19	4.20644e-18
ANKRD50	1165.42	1.67943	0.187044	8.97875	2.73857e-19	4.28062e-18
HELT	8.86667	-5.29688	0.589948	-8.97855	2.74348e-19	4.28449e-18
PCDP1	318.778	-3.21596	0.358305	-8.97548	2.82132e-19	4.40215e-18
HIST1H2BI	89.8444	2.59159	0.288753	8.9751	2.8309e-19	4.41319e-18
XXyac-YM21GA2.3	6.93333	-4.86506	0.542312	-8.97095	2.93955e-19	4.57852e-18
FAM3B	41.6667	-4.08288	0.455183	-8.96974	2.97214e-19	4.6252e-18
CD101	32.8444	1.84321	0.205582	8.96582	3.07989e-19	4.78864e-18
TFEB	98.1111	-1.50125	0.167479	-8.96382	3.13611e-19	4.87175e-18
CNPPD1	317.467	-1.65279	0.184415	-8.96235	3.17846e-19	4.93319e-18
BAG3	293.956	-1.38219	0.154225	-8.96219	3.18302e-19	4.93592e-18
NDUFV1	559.133	-1.03667	0.115675	-8.96197	3.18936e-19	4.94141e-18
CDC25C	22.4222	4.49471	0.501572	8.96124	3.21052e-19	4.96981e-18
RP11-208K4.1	7.2	-5.1653	0.576527	-8.95933	3.26669e-19	5.05233e-18
PRRX1	526.289	3.84011	0.428639	8.95884	3.28117e-19	5.07028e-18
CEP170B	315.422	-2.03587	0.22748	-8.94965	3.5662e-19	5.50589e-18
TCEAL5	17.2889	3.07572	0.343703	8.94877	3.59451e-19	5.54474e-18
RP11-408H1.3	19.2	-3.55182	0.397174	-8.94273	3.79686e-19	5.85175e-18
FAM111B	58.7556	3.30079	0.369275	8.93856	3.9426e-19	6.07105e-18
EXO1	53.1556	3.88394	0.434602	8.93678	4.00677e-19	6.16448e-18
MSC	44.7333	3.33042	0.372696	8.93603	4.03399e-19	6.20094e-18
COL4A4	1354.51	-3.44307	0.385338	-8.93522	4.06381e-19	6.24134e-18
TRPV6	83.8667	-4.04556	0.452912	-8.93232	4.17177e-19	6.39598e-18
CDKN3	16.8222	3.77638	0.422978	8.92808	4.33458e-19	6.63982e-18
MT-RNR2	218420	-2.07494	0.232427	-8.9273	4.36547e-19	6.68133e-18
CTSLP1	8.64444	-4.77102	0.5347	-8.92279	4.54703e-19	6.95317e-18
TPRG1	74.4889	2.62417	0.294123	8.92201	4.57885e-19	6.98969e-18
CTD-2247C11.5	11.7778	-5.9781	0.670078	-8.9215	4.60033e-19	7.01641e-18
PCSK1N	132.4	-2.71267	0.304079	-8.92096	4.62268e-19	7.04439e-18
MAP7	429.267	-2.74737	0.308131	-8.91623	4.8245e-19	7.34558e-18
MSH6	621.422	1.16925	0.131184	8.91304	4.96499e-19	7.54645e-18
MOGAT3	6.8	-5.22436	0.586328	-8.91031	5.08912e-19	7.72844e-18
EPAS1	2378.8	-1.88717	0.211961	-8.90337	5.41771e-19	8.22036e-18
LINC01060	24.8222	-3.92864	0.441307	-8.90229	5.47054e-19	8.29337e-18
ACTN4	2810.4	-1.04619	0.117549	-8.90001	5.58407e-19	8.45821e-18
PDE8B	289.067	-2.49365	0.280208	-8.8993	5.61989e-19	8.50515e-18
MYRFL	60.4444	-2.7204	0.3057	-8.89893	5.63873e-19	8.52634e-18
ZNF423	354.111	2.11884	0.238164	8.89656	5.76025e-19	8.70261e-18
GLIS3	908.733	-1.62659	0.183277	-8.87502	6.99211e-19	1.05547e-17
MT-TH	225.711	-2.82178	0.318057	-8.87193	7.18897e-19	1.08425e-17
GCAT	52.1778	-1.48763	0.167713	-8.87007	7.3101e-19	1.10158e-17
PDGFRL	71.6667	3.17428	0.358017	8.86628	7.56295e-19	1.13871e-17
RAB9B	43.4	2.75376	0.310592	8.86617	7.57042e-19	1.13886e-17
C7orf41	1113.04	-1.97174	0.222409	-8.86541	7.62239e-19	1.1457e-17
CACNB3	146.2	1.79595	0.202598	8.86463	7.67596e-19	1.15277e-17
ETFB	81.0222	-1.40281	0.158261	-8.86389	7.72733e-19	1.15949e-17
PRKDC	4340.67	1.01377	0.114407	8.86106	7.92584e-19	1.18827e-17
LRRC20	42.1556	1.87861	0.212129	8.85599	8.2944e-19	1.24247e-17
CCNA2	104.622	2.84223	0.321073	8.85231	8.57296e-19	1.2831e-17
SLC25A25	492.067	-1.9214	0.21706	-8.85194	8.60138e-19	1.28626e-17
TMEM132A	161.822	2.11979	0.239481	8.85156	8.63022e-19	1.28948e-17
RP11-395P17.3	135.022	-1.61821	0.18286	-8.84945	8.79481e-19	1.31296e-17
RALYL	132.289	-5.06125	0.572193	-8.84536	9.12302e-19	1.36081e-17
C1QTNF6	154.067	1.35016	0.15269	8.84254	9.35686e-19	1.3945e-17
TOPBP1	628.111	1.09559	0.123906	8.84215	9.38937e-19	1.39817e-17
MMS22L	396.533	1.7457	0.19752	8.83807	9.73832e-19	1.4489e-17
MIA2	12.7556	-5.12326	0.579717	-8.83752	9.78654e-19	1.45485e-17
NR1H4	94.2889	-3.93872	0.445848	-8.83423	1.00793e-18	1.4971e-17
ACVR1B	612.911	-1.30604	0.147887	-8.83132	1.03444e-18	1.53519e-17
TMEM120A	116.067	-1.31107	0.148472	-8.83042	1.04286e-18	1.54638e-17
RNF183	35.9556	-3.81465	0.432047	-8.82924	1.0539e-18	1.56144e-17
PLB1	52.6444	1.70221	0.19283	8.82751	1.07036e-18	1.58449e-17
UGT8	585.556	-3.54167	0.401258	-8.82642	1.08075e-18	1.59853e-17
USHBP1	42.3333	-2.32674	0.263755	-8.82159	1.12842e-18	1.66763e-17
SLC2A12	132.511	-1.93019	0.21883	-8.8205	1.13951e-18	1.68262e-17
KIAA1522	471.8	-1.82695	0.207162	-8.81895	1.15541e-18	1.70467e-17
MT-TM	95.6444	-2.42862	0.275426	-8.81767	1.16863e-18	1.72129e-17
SHB	92.2444	-1.75754	0.199333	-8.81709	1.17474e-18	1.72884e-17
GPR157	65.0222	-1.74842	0.198321	-8.81614	1.18478e-18	1.74215e-17
LINC00472	945.111	-2.71245	0.30775	-8.81381	1.20963e-18	1.77721e-17
NAP1L1	3601.2	1.37734	0.156284	8.81306	1.21772e-18	1.78762e-17
RP11-254F7.3	29.1556	-4.98618	0.565842	-8.81197	1.22967e-18	1.80365e-17
PLEKHO1	66.6	1.43309	0.162683	8.80913	1.26118e-18	1.84833e-17
PER1	1134.31	-2.00991	0.228169	-8.80885	1.26431e-18	1.85138e-17
RP11-183M13.1	25.5111	-3.72778	0.423726	-8.79762	1.39746e-18	2.04466e-17
ADAMTS7	209.111	1.96269	0.2231	8.79734	1.40094e-18	2.04805e-17
ERP27	82.0222	-2.66308	0.302741	-8.79655	1.41092e-18	2.06092e-17
IHH	11.5556	-5.08897	0.578691	-8.79393	1.44422e-18	2.10781e-17
LINC00900	17.2889	3.84533	0.437566	8.788	1.52246e-18	2.22016e-17
MMP24-AS1	137.978	-1.62331	0.184853	-8.78165	1.61091e-18	2.34721e-17
TMEM30B	222.667	-3.24939	0.370262	-8.77591	1.69523e-18	2.46803e-17
RNF122	135.889	1.49818	0.170737	8.77479	1.71222e-18	2.49071e-17
BLM	84.9333	2.64484	0.301559	8.77056	1.77776e-18	2.58391e-17
ERCC6L	18.8667	3.59176	0.409733	8.76611	1.84952e-18	2.68599e-17
RP11-395G23.3	40.3333	-2.27189	0.259189	-8.76537	1.86161e-18	2.70132e-17
SERPINA1	421.244	-3.15591	0.360049	-8.76523	1.86403e-18	2.70262e-17
IKBIP	140.422	1.6303	0.186016	8.76427	1.87985e-18	2.7233e-17
ACADS	76.4222	-1.65393	0.188843	-8.75826	1.98295e-18	2.8703e-17
FRMD7	20.9556	-3.99493	0.456194	-8.75708	2.0037e-18	2.89796e-17
CDCA5	39.9333	3.38021	0.386121	8.75427	2.05425e-18	2.96864e-17
CENPA	17.0222	3.96523	0.453812	8.73761	2.38095e-18	3.43794e-17
ELN	586.089	2.67255	0.306081	8.73151	2.51284e-18	3.62541e-17
RP11-296I10.3	97.8444	-3.87066	0.443738	-8.72286	2.71266e-18	3.91049e-17
LGR4	1434.76	-1.61316	0.184973	-8.72102	2.75709e-18	3.97129e-17
DPP4	467.311	-3.14715	0.360909	-8.72007	2.78028e-18	4.00143e-17
SERPINH1	974.6	1.35702	0.155751	8.71277	2.96532e-18	4.26426e-17
SIAE	279.911	-1.79345	0.205851	-8.71238	2.97564e-18	4.2756e-17
GPR56	853.222	-2.78472	0.319844	-8.70651	3.13379e-18	4.49551e-17
GRAMD2	30.5556	-2.81295	0.323131	-8.70528	3.1678e-18	4.5406e-17
RP11-320M16.1	42.7556	-2.63593	0.302887	-8.70269	3.24098e-18	4.64171e-17
RP11-231P20.2	16.2222	-3.55359	0.408417	-8.70088	3.29332e-18	4.71285e-17
RRM2	138.644	2.46973	0.283883	8.69979	3.32485e-18	4.7541e-17
KRT7	401.6	-4.50967	0.518537	-8.6969	3.41065e-18	4.87283e-17
WASF1	192.267	1.50307	0.172855	8.69557	3.4509e-18	4.92635e-17
RP11-218E20.3	22.9333	-3.38461	0.389418	-8.69147	3.57772e-18	5.10325e-17
CNGA1	41.1111	-2.96506	0.341196	-8.6902	3.61803e-18	5.15657e-17
ILVBL	241.111	-1.18145	0.13605	-8.68397	3.822e-18	5.43409e-17
HAAO	124.689	-2.58437	0.297783	-8.6787	4.00328e-18	5.68697e-17
AC118754.4	7.53333	-4.75081	0.547416	-8.67861	4.00632e-18	5.68697e-17
RP1-288H2.2	21	-4.31286	0.497486	-8.66931	4.34752e-18	6.16633e-17
MIR181A1HG	186.133	2.54475	0.293891	8.65881	4.76699e-18	6.75586e-17
PIGH	127.756	-1.20312	0.13896	-8.65804	4.79952e-18	6.79649e-17
HADH	422.133	-1.04588	0.120807	-8.65743	4.82527e-18	6.82746e-17
AURKA	45.5111	1.71513	0.198152	8.65564	4.9017e-18	6.93004e-17
CLYBL	176.378	-1.5817	0.182768	-8.65416	4.9657e-18	7.0149e-17
FTLP14	15.2222	-4.01902	0.464559	-8.65127	5.09303e-18	7.189e-17
TIA1	2066.04	1.23007	0.142188	8.65098	5.10578e-18	7.20123e-17
ACOT4	16.3778	-2.53804	0.293407	-8.65024	5.13895e-18	7.24222e-17
L1CAM	286.844	-3.86412	0.446743	-8.64953	5.1711e-18	7.28171e-17
FOXQ1	53.1333	-3.68932	0.426973	-8.64063	5.5902e-18	7.8593e-17
TACC3	125.244	1.95152	0.225921	8.63809	5.71616e-18	8.02998e-17
HMGCL	168.6	-1.0993	0.127288	-8.63632	5.80503e-18	8.14832e-17
AIM1	595.911	-2.2775	0.263755	-8.63489	5.87819e-18	8.24445e-17
CDH11	1756.18	2.39507	0.277402	8.63394	5.92716e-18	8.30652e-17
CCND2	2480.67	2.54796	0.295239	8.63016	6.12665e-18	8.57926e-17
TOX3	290.222	-3.09894	0.359289	-8.6252	6.39791e-18	8.95199e-17
FAM178A	1162.93	1.21825	0.141248	8.62491	6.41427e-18	8.96775e-17
ESRRG	1345	-2.63237	0.305309	-8.62199	6.57999e-18	9.19216e-17
LINC00645	168.956	-4.59061	0.532579	-8.61959	6.71969e-18	9.37987e-17
HIST1H2BN	187.378	2.02293	0.234759	8.61703	6.87159e-18	9.58432e-17
DRAXIN	18.0889	2.88613	0.335185	8.61057	7.26957e-18	1.01314e-16
ACY1	24.3333	-2.27593	0.264374	-8.60877	7.38476e-18	1.02838e-16
DCPS	98.7111	-1.4952	0.173692	-8.60835	7.41223e-18	1.03139e-16
RGS10	91.1556	1.96903	0.228864	8.6035	7.73182e-18	1.07501e-16
MT1X	77.1556	-2.94298	0.342095	-8.6028	7.77922e-18	1.08075e-16
RP11-205M3.3	22.2667	-5.62149	0.65358	-8.60108	7.8969e-18	1.09623e-16
PMM1	139.422	-1.53999	0.179132	-8.59693	8.1875e-18	1.13568e-16
PHLDA3	68.0444	1.90575	0.221748	8.59423	8.38273e-18	1.16184e-16
AC013275.2	17.8444	-3.86135	0.449422	-8.5918	8.56199e-18	1.18482e-16
VWA7	41.7111	-2.6448	0.307827	-8.59184	8.55909e-18	1.18482e-16
SLCO4A1	158.267	-3.81307	0.443847	-8.59094	8.62597e-18	1.19274e-16
HILPDA	44.1778	1.49398	0.17391	8.59055	8.65517e-18	1.19584e-16
TTC39C	206.044	1.52929	0.178051	8.58905	8.76894e-18	1.21061e-16
RP11-456O19.2	29.6444	4.2672	0.496865	8.58826	8.82944e-18	1.21801e-16
TM4SF18	234.911	-1.83228	0.213428	-8.58504	9.08043e-18	1.25165e-16
ADAM19	309.711	1.61862	0.188639	8.5805	9.44576e-18	1.29997e-16
TMEM192	307.8	-1.14736	0.133718	-8.58039	9.45495e-18	1.30022e-16
MIR4461	85.5111	-2.13117	0.248407	-8.57934	9.54164e-18	1.31063e-16
MSRA	228.267	-1.68312	0.196184	-8.5793	9.54554e-18	1.31063e-16
MLXIPL	178.156	-4.59362	0.535821	-8.57305	1.0078e-17	1.38266e-16
RP11-81H14.2	25.3778	-2.07376	0.241901	-8.57277	1.01027e-17	1.38486e-16
RFX7	693.889	1.15153	0.134325	8.57269	1.01097e-17	1.38486e-16
CALCR	53.5556	-4.33149	0.505294	-8.57221	1.0152e-17	1.38957e-16
ST14	396.556	-2.36613	0.276031	-8.57195	1.01744e-17	1.39156e-16
PLXNC1	436.156	2.44556	0.285339	8.57074	1.02822e-17	1.40445e-16
WWP2	614.356	-1.10601	0.129046	-8.57071	1.02846e-17	1.40445e-16
GRTP1	69.6222	-2.24692	0.262197	-8.56959	1.03855e-17	1.41712e-16
SLC16A1	446.622	2.14128	0.249982	8.56572	1.074e-17	1.46385e-16
SREBF2	1041.78	-1.12763	0.131645	-8.56567	1.07445e-17	1.46385e-16
GRHL2	273.8	-3.90585	0.45602	-8.56508	1.08002e-17	1.4703e-16
ATG4D	104.289	-1.25474	0.146515	-8.56387	1.09143e-17	1.48469e-16
PRR15L	82.3556	-4.18191	0.488352	-8.56332	1.09665e-17	1.49064e-16
CTD-2341M24.1	34.1556	2.33294	0.272642	8.5568	1.16041e-17	1.57609e-16
SCARB1	186.067	1.53869	0.179868	8.55458	1.18298e-17	1.6055e-16
MTRNR2L8	305.289	-2.23399	0.261154	-8.55431	1.18578e-17	1.60796e-16
NDUFS8	156.244	-1.0066	0.117673	-8.55423	1.18662e-17	1.60796e-16
VWA5B1	65.5111	-5.19299	0.607402	-8.54952	1.23601e-17	1.6736e-16
CEP170P1	23.8444	1.96889	0.230301	8.5492	1.23944e-17	1.67695e-16
GSTK1	757.244	-1.03262	0.1208	-8.54817	1.25051e-17	1.69064e-16
MIR22HG	209.956	-2.46664	0.28864	-8.54575	1.27708e-17	1.72523e-16
IL1RL1	281.067	-3.78257	0.442638	-8.54552	1.27961e-17	1.72733e-16
MTMR10	1497.53	-1.10758	0.129648	-8.54297	1.30812e-17	1.76446e-16
GRM1	45.7556	-3.01301	0.352924	-8.53726	1.3744e-17	1.85244e-16
SLC44A4	109.644	-3.4021	0.398558	-8.53603	1.38914e-17	1.87031e-16
NCAPD2	557.911	1.30651	0.153089	8.53429	1.41013e-17	1.89624e-16
VAV3	902.867	-1.88758	0.221195	-8.53357	1.41899e-17	1.90671e-16
FAHD1	130.6	-1.36039	0.159425	-8.53311	1.4247e-17	1.91292e-16
PRSS22	28.5333	-4.51866	0.52961	-8.53206	1.4377e-17	1.9289e-16
FOLH1B	19	-4.73737	0.555466	-8.52864	1.48072e-17	1.98511e-16
HIST1H3D	253.733	2.22309	0.260734	8.52627	1.51141e-17	2.02472e-16
VCAN	7608.33	2.89909	0.340024	8.52615	1.51297e-17	2.02526e-16
LEPREL2	88.6444	1.88881	0.221566	8.52479	1.53082e-17	2.04761e-16
INSR	2091.93	-1.37423	0.161219	-8.524	1.54134e-17	2.0601e-16
MAP4K4	1559.22	1.45559	0.170776	8.52342	1.54906e-17	2.06886e-16
RERGL	35.8444	-2.56534	0.301045	-8.52147	1.57539e-17	2.10243e-16
PLEKHG3	884.044	-1.31985	0.154891	-8.52116	1.57957e-17	2.10641e-16
BLNK	192.356	-2.47403	0.290391	-8.51966	1.60026e-17	2.13239e-16
CDK2AP2	159.378	-1.72754	0.202789	-8.51889	1.61085e-17	2.14488e-16
HIST1H3H	309.867	2.2788	0.267507	8.51866	1.61415e-17	2.14765e-16
AC011891.5	89.1556	-4.14779	0.487105	-8.51519	1.6632e-17	2.21124e-16
RP11-368L12.1	34.4444	-3.85526	0.452782	-8.51459	1.67179e-17	2.22099e-16
LRRC37A6P	38.2444	-2.43661	0.286189	-8.514	1.68041e-17	2.22908e-16
RP11-728F11.3	11.7111	-4.92287	0.578205	-8.51406	1.67947e-17	2.22908e-16
ITIH5	440.156	-3.23436	0.380056	-8.51022	1.73605e-17	2.30115e-16
NUAK2	352.689	-2.48535	0.292134	-8.50757	1.77613e-17	2.35251e-16
TMCO4	200.489	-1.2962	0.152391	-8.50573	1.80449e-17	2.38827e-16
RP11-61A14.2	33.1333	-1.72471	0.203025	-8.49506	1.9783e-17	2.61634e-16
NGEF	56.3111	-2.94881	0.347225	-8.4925	2.02244e-17	2.67156e-16
AZGP1P1	12.4222	-5.88425	0.692901	-8.4922	2.02764e-17	2.67557e-16
HIBADH	591.311	-1.16968	0.137789	-8.48888	2.08647e-17	2.75114e-16
ESAM	233.267	-1.48766	0.175267	-8.48799	2.10239e-17	2.77007e-16
DBF4	108.867	1.26976	0.149705	8.48174	2.21844e-17	2.92078e-16
RP11-279F6.3	16.0667	-3.13228	0.369647	-8.47371	2.37697e-17	3.12482e-16
RP11-794G24.1	35.2222	-3.50003	0.41351	-8.4642	2.57916e-17	3.38811e-16
MFAP2	200.378	3.28486	0.388212	8.46152	2.63916e-17	3.46434e-16
CABYR	27.8222	3.5306	0.417474	8.45704	2.7424e-17	3.59718e-16
L2HGDH	190.022	-1.45361	0.171942	-8.45406	2.81341e-17	3.68483e-16
AC027612.4	8.46667	-4.95709	0.586414	-8.45323	2.83365e-17	3.70858e-16
TP53INP1	870.933	1.05523	0.124844	8.45237	2.85437e-17	3.73293e-16
NELL1	241.111	-5.16683	0.611318	-8.45194	2.86492e-17	3.74395e-16
SUCLG1	710.6	-1.35879	0.1608	-8.45021	2.90783e-17	3.7972e-16
CTD-3006G17.2	34.5556	3.82302	0.452536	8.448	2.96329e-17	3.86676e-16
ATP1B3	694.6	-1.58933	0.188239	-8.44316	3.08863e-17	4.02734e-16
CA10	51.5333	-4.24846	0.503215	-8.44263	3.10267e-17	4.04265e-16
MT-TD	41.2222	-3.64082	0.431289	-8.44172	3.12713e-17	4.07151e-16
DCHS2	217.311	2.61451	0.309757	8.44052	3.15919e-17	4.11021e-16
FGFR4	191.444	-2.68657	0.318425	-8.43706	3.25428e-17	4.2308e-16
JAKMIP2	47.4	2.52441	0.299388	8.43191	3.40063e-17	4.41781e-16
KDR	590.378	-1.52531	0.18099	-8.42759	3.52866e-17	4.58075e-16
SLC3A2	650.222	-1.07647	0.127787	-8.4239	3.64167e-17	4.72398e-16
KIF1C	740.378	-1.12122	0.133117	-8.4228	3.67576e-17	4.76469e-16
UBTD2	316.133	1.0459	0.124188	8.42191	3.70401e-17	4.79778e-16
RPL6	2834.42	1.0916	0.129626	8.42118	3.72702e-17	4.82404e-16
NUDT7	43.4	-1.68923	0.200651	-8.41875	3.80511e-17	4.92149e-16
DSCC1	38	2.69025	0.319558	8.41866	3.80814e-17	4.92181e-16
SPRED1	875.733	1.15887	0.137659	8.4184	3.81651e-17	4.92901e-16
TPMT	250.022	-1.68432	0.200113	-8.41687	3.8667e-17	4.99017e-16
BARD1	340.533	1.40715	0.167217	8.41514	3.9242e-17	5.06067e-16
SGSM1	141.533	-2.75306	0.327287	-8.41177	4.03875e-17	5.20458e-16
RGL3	480.8	-2.91081	0.346199	-8.40791	4.17383e-17	5.37472e-16
KCNT2	367.733	2.29396	0.272875	8.40662	4.21985e-17	5.43001e-16
NAPRT1	224.378	-1.67897	0.199724	-8.40644	4.22654e-17	5.43466e-16
ITPK1	322.178	-1.06961	0.127249	-8.40568	4.25396e-17	5.46591e-16
NUP107	530.133	1.10708	0.13174	8.40354	4.33226e-17	5.56247e-16
SHMT2	243.733	1.3559	0.16136	8.40298	4.35288e-17	5.58488e-16
PAPPA	579.756	-2.04389	0.243271	-8.40172	4.40004e-17	5.63781e-16
ROGDI	100.022	-1.50333	0.178931	-8.4017	4.40054e-17	5.63781e-16
TNFRSF11B	204.044	-2.94605	0.350924	-8.39513	4.65369e-17	5.95781e-16
SLC39A13	331.222	-1.09919	0.130966	-8.393	4.73885e-17	6.06242e-16
HDAC2	894.756	1.18929	0.14171	8.3924	4.76318e-17	6.08912e-16
RP11-386I14.3	8.42222	-3.1263	0.372619	-8.39005	4.85928e-17	6.20748e-16
NPHS2	256.133	-6.90942	0.823544	-8.38986	4.86733e-17	6.20875e-16
PYCR1	33.3111	3.07659	0.36679	8.38789	4.94931e-17	6.30876e-16
AC112198.1	19.5778	-3.70851	0.442449	-8.38177	5.21365e-17	6.6409e-16
CDK4	374.422	1.02706	0.122592	8.3779	5.38799e-17	6.858e-16
PPL	467.356	-3.11029	0.371434	-8.37373	5.58243e-17	7.10036e-16
LRP8	71.9556	2.03509	0.243071	8.37243	5.64428e-17	7.17385e-16
H2AFX	137.556	1.72374	0.205948	8.36975	5.77424e-17	7.33374e-16
TMEM25	56.9111	-1.10971	0.132612	-8.36811	5.85506e-17	7.42568e-16
LA16c-329F2.1	9.48889	-5.10532	0.610141	-8.36744	5.88859e-17	7.46284e-16
RP11-111G23.1	37.1111	-2.38372	0.284947	-8.36551	5.98538e-17	7.58005e-16
SLC6A17	19.0222	-3.3611	0.401855	-8.36395	6.06511e-17	7.67e-16
ANXA11	1039.73	-1.44986	0.173345	-8.36401	6.06222e-17	7.67e-16
RP3-333A15.1	7.33333	-4.14834	0.496054	-8.36267	6.13159e-17	7.74849e-16
KLF9	1401.53	-1.71845	0.205615	-8.35761	6.40023e-17	8.07061e-16
FAM83B	117.644	-4.48975	0.537311	-8.35596	6.49009e-17	8.17807e-16
RP11-115K3.1	34.8222	-4.92093	0.58898	-8.355	6.54344e-17	8.2394e-16
QRFPR	10.4	-3.34457	0.400375	-8.35359	6.6221e-17	8.33249e-16
NOVA2	60.6222	-1.95566	0.234263	-8.34812	6.93577e-17	8.72095e-16
TMEM116	267.178	-1.57928	0.189196	-8.3473	6.98396e-17	8.77528e-16
GPX7	79.2889	1.64197	0.196725	8.3465	7.03155e-17	8.82878e-16
EIF3EP1	29.2	1.89557	0.227168	8.34436	7.15979e-17	8.98339e-16
ZBTB16	513.022	-2.52634	0.30292	-8.33996	7.43141e-17	9.31756e-16
MAP2K3	295.8	-1.76054	0.211105	-8.33963	7.45249e-17	9.33734e-16
TMEM45B	126.756	-3.39	0.406808	-8.33316	7.87115e-17	9.84789e-16
GJC1	332.689	1.83663	0.2208	8.31808	8.94009e-17	1.11694e-15
CNR1	57.1556	3.22862	0.388568	8.30904	9.64834e-17	1.20457e-15
FAM149A	231.4	-2.22441	0.267807	-8.30602	9.89669e-17	1.2347e-15
KNTC1	837.978	1.74722	0.210404	8.30414	1.00547e-16	1.25353e-15
ROBO4	257.467	-1.60603	0.193535	-8.29844	1.0549e-16	1.31423e-15
HEY1	112.333	2.10972	0.254295	8.29635	1.0736e-16	1.33658e-15
2025-03-02	503.489	-2.05448	0.247673	-8.29514	1.08456e-16	1.34926e-15
AC074286.1	228	-2.41638	0.291332	-8.29424	1.09281e-16	1.35857e-15
EPHB2	170.356	1.80708	0.217942	8.29157	1.1176e-16	1.38841e-15
C11orf35	49.1778	-3.04779	0.367589	-8.29131	1.12009e-16	1.39052e-15
WRN	664.8	1.12564	0.135781	8.29015	1.13109e-16	1.40319e-15
ST6GAL2-IT1	7.62222	4.14673	0.500294	8.28859	1.14597e-16	1.42065e-15
TRPM3	1759.93	-3.3636	0.405846	-8.28787	1.15291e-16	1.42825e-15
LHFPL3-AS1	55.0667	-4.11123	0.49615	-8.28626	1.16862e-16	1.44669e-15
CCNE2	35.7333	2.75274	0.3323	8.28388	1.19223e-16	1.47488e-15
KIF26A	86.9556	-2.62035	0.316386	-8.28213	1.20995e-16	1.49575e-15
ILDR1	72.9778	-3.71796	0.449081	-8.27904	1.24174e-16	1.53398e-15
ISLR	330.578	2.34623	0.283412	8.27852	1.24719e-16	1.53963e-15
TEX264	167.289	-1.15835	0.13993	-8.27809	1.25168e-16	1.54409e-15
SLC44A3	267.222	-2.30733	0.278751	-8.27737	1.25923e-16	1.55231e-15
FRK	683.778	-2.56185	0.309772	-8.27011	1.33836e-16	1.6487e-15
TTC39A	67.8222	-2.44446	0.295637	-8.26843	1.3573e-16	1.67087e-15
RBM47	1437.33	-2.40652	0.291054	-8.26829	1.35891e-16	1.67169e-15
TM4SF5	7.04444	-5.24753	0.635151	-8.26187	1.43411e-16	1.7608e-15
MT-TF	10.1111	-3.22791	0.390701	-8.26185	1.43435e-16	1.7608e-15
MYOM3	462.378	-4.33186	0.524379	-8.26094	1.44526e-16	1.77296e-15
GLTPD1	89.0667	-1.18513	0.143484	-8.25963	1.46131e-16	1.7914e-15
GLIS1	75.8222	-3.26211	0.394961	-8.25933	1.46491e-16	1.79457e-15
GPR4	41.7333	-1.88708	0.228532	-8.25741	1.48873e-16	1.82248e-15
ZMAT3	818.311	1.43909	0.174432	8.25016	1.58187e-16	1.93516e-15
DNASE1	513.667	-1.47036	0.178267	-8.24805	1.61001e-16	1.96822e-15
IPO9	1232.87	1.01685	0.123292	8.24753	1.61704e-16	1.97544e-15
PHF15	435.289	-1.4431	0.175076	-8.24273	1.6832e-16	2.05342e-15
MYO3B	235.533	-3.02985	0.36765	-8.24113	1.70588e-16	2.07964e-15
HIST1H2BJ	149.889	2.2016	0.26723	8.23857	1.74286e-16	2.12326e-15
BACH2	304.244	1.83486	0.22273	8.23804	1.75053e-16	2.13112e-15
HNRNPA1	6080.04	1.04809	0.127256	8.23603	1.78019e-16	2.16424e-15
GINS2	30.6	2.70196	0.328077	8.23575	1.78434e-16	2.16779e-15
FLT1	636.689	-1.78282	0.216507	-8.23449	1.80322e-16	2.18922e-15
AC007362.1	61.1333	2.42672	0.294848	8.2304	1.86587e-16	2.26371e-15
LINC00607	21.1556	2.9065	0.353155	8.23008	1.87096e-16	2.26833e-15
ZC3H12A	163.244	-2.71543	0.330093	-8.22627	1.93137e-16	2.33996e-15
LAMC1	3093.76	1.28542	0.156313	8.22341	1.97793e-16	2.39472e-15
AC114812.10	24.4667	-5.00699	0.609115	-8.2201	2.03329e-16	2.46005e-15
PLEKHA7	644.733	-2.3976	0.291776	-8.21726	2.08211e-16	2.51739e-15
FBXO2	20.8222	-2.63091	0.320223	-8.21588	2.10618e-16	2.54476e-15
MPV17L	136.489	-1.51053	0.18389	-8.21435	2.13319e-16	2.57562e-15
A4GALT	124.422	-2.28228	0.27786	-8.21376	2.14367e-16	2.5865e-15
RP11-311F12.1	10.4889	-3.35342	0.408298	-8.21315	2.15463e-16	2.59794e-15
IL17RE	60.9333	-2.32303	0.28293	-8.2106	2.20085e-16	2.65186e-15
GAD1	159.822	-2.89704	0.352946	-8.20819	2.24551e-16	2.70197e-15
WDR76	100.778	1.5528	0.18923	8.2059	2.28871e-16	2.75207e-15
C10orf67	35.3778	-2.43108	0.296273	-8.20555	2.29541e-16	2.75824e-15
LETM1	441.244	-1.03896	0.12663	-8.20469	2.31182e-16	2.77607e-15
ZDHHC23	143.111	-1.85449	0.226037	-8.20436	2.31822e-16	2.78187e-15
CHEK2	64.8444	1.48661	0.181205	8.20402	2.3247e-16	2.78774e-15
DNAI1	31.4	-2.15265	0.262497	-8.20064	2.39108e-16	2.8654e-15
TLDC2	28.7556	-3.04293	0.371107	-8.19961	2.41167e-16	2.88708e-15
GPR34	56.6444	2.2704	0.276892	8.19957	2.41245e-16	2.88708e-15
CPT2	199	-1.16667	0.142306	-8.19831	2.43781e-16	2.91544e-15
ANO2	113.133	1.78904	0.21829	8.1957	2.49138e-16	2.97748e-15
CTC-248O19.1	9.95556	-3.60378	0.439742	-8.19521	2.50166e-16	2.98775e-15
RASSF7	103.933	-2.27757	0.277928	-8.1948	2.51003e-16	2.99571e-15
TMEM53	67.6	-1.44447	0.176291	-8.19367	2.53375e-16	3.02197e-15
ARHGEF38-IT1	14.7778	-3.52272	0.429995	-8.19248	2.55908e-16	3.05011e-15
RP11-386G11.10	51.8	1.97278	0.240893	8.18943	2.62463e-16	3.12613e-15
RP11-59E19.1	8.44444	-4.80776	0.58729	-8.18635	2.69263e-16	3.20496e-15
PPP1CC	772.222	1.08273	0.132317	8.18281	2.77301e-16	3.2984e-15
OVCH2	28.9556	-3.52987	0.431454	-8.18133	2.80724e-16	3.33686e-15
ADM2	47.8	-3.12222	0.381655	-8.18074	2.82102e-16	3.35098e-15
LINC01037	12.1111	3.65941	0.447337	8.18043	2.82844e-16	3.35594e-15
RP3-523K23.2	34.2	-3.75221	0.458683	-8.1804	2.829e-16	3.35594e-15
ADHFE1	314.089	-1.56845	0.19176	-8.17924	2.85641e-16	3.38617e-15
AC007246.3	141.644	-1.57164	0.192227	-8.17593	2.93585e-16	3.47801e-15
SEMA3B	302.667	-1.89929	0.232376	-8.17335	2.99934e-16	3.54845e-15
SIK1	1011.58	-2.29159	0.28037	-8.17343	2.99754e-16	3.54845e-15
CHRM3	132.4	-2.2086	0.270298	-8.17097	3.0592e-16	3.61442e-15
KCNH2	90.5556	3.40226	0.416509	8.1685	3.12236e-16	3.68656e-15
MSI1	59.4222	2.06546	0.252877	8.16782	3.14011e-16	3.70504e-15
FN1	12409.9	1.97058	0.241326	8.16565	3.19719e-16	3.76985e-15
GLUD1	1205.96	-1.25862	0.154209	-8.16182	3.30012e-16	3.88862e-15
KIAA1211	239.022	2.01169	0.246533	8.15991	3.35285e-16	3.94812e-15
RP11-932O9.10	12.8222	3.18051	0.389914	8.15694	3.43618e-16	4.04353e-15
KIF2A	447.289	1.21784	0.149324	8.15566	3.4727e-16	4.08378e-15
STX3	562.978	-2.00209	0.245675	-8.14936	3.65864e-16	4.29957e-15
GLUD2	22.4222	-2.21447	0.271762	-8.14855	3.68311e-16	4.32545e-15
NPR3	591.178	-2.81387	0.345467	-8.14513	3.78878e-16	4.44658e-15
IDNK	60.6444	-1.49167	0.183219	-8.14143	3.90639e-16	4.58156e-15
SPR	51.5111	-2.47225	0.303692	-8.14066	3.93132e-16	4.60772e-15
MYO6	2391.36	-1.57852	0.193972	-8.13788	4.02275e-16	4.71175e-15
CDT1	26.4444	2.74153	0.337146	8.13158	4.23717e-16	4.9596e-15
PRKCZ	186.067	-1.89875	0.233531	-8.13062	4.27084e-16	4.9957e-15
AMOTL1	1107	1.15409	0.142081	8.12281	4.5551e-16	5.32466e-15
RUNX1	678.756	1.95379	0.240547	8.12227	4.57563e-16	5.34511e-15
INTS7	306.111	1.19699	0.147469	8.1169	4.78241e-16	5.58296e-15
PRIM2	203.289	1.27456	0.157089	8.1136	4.91399e-16	5.73278e-15
BRCA1	211.733	1.7131	0.211165	8.1126	4.95475e-16	5.7765e-15
NEBL	1196.56	-2.17689	0.268506	-8.10743	5.17002e-16	6.02348e-15
MKNK2	535.444	-1.21356	0.149691	-8.1071	5.18435e-16	6.03618e-15
C1orf172	29.6	-2.88313	0.355933	-8.10021	5.48638e-16	6.38363e-15
PTCSC3	11.8444	-4.76855	0.58912	-8.09435	5.75693e-16	6.68958e-15
LRRC2	116.578	-2.4857	0.307148	-8.09284	5.82872e-16	6.76854e-15
LINC00961	26.2444	-2.25544	0.278718	-8.09217	5.86134e-16	6.80193e-15
TTLL6	26.3778	-3.95308	0.488692	-8.08909	6.0111e-16	6.97114e-15
GATA2	246.8	-2.99347	0.370252	-8.08495	6.21877e-16	7.20722e-15
PALM	219.844	-1.67625	0.207445	-8.08044	6.45318e-16	7.47398e-15
LINC00970	14.8444	-3.23196	0.400155	-8.07678	6.64969e-16	7.69651e-15
FSTL1	2933.22	1.59289	0.197245	8.0757	6.70929e-16	7.7604e-15
RBFOX2	1898.56	1.38541	0.171573	8.07472	6.76306e-16	7.81746e-15
LAMB4	34.1111	-2.25376	0.27918	-8.07278	6.87162e-16	7.93253e-15
SPDL1	138.578	1.2049	0.149333	8.06855	7.11356e-16	8.20645e-15
ERBB2	1186.82	-1.43804	0.178266	-8.06684	7.21401e-16	8.31689e-15
CYP3A7	38.7333	-3.7521	0.465187	-8.06579	7.27631e-16	8.38322e-15
EHD3	276.889	-1.97627	0.245047	-8.06489	7.33021e-16	8.43497e-15
COA3	212.156	-1.30764	0.162143	-8.06475	7.33857e-16	8.4384e-15
CTC-321K16.1	10.6222	-3.86075	0.478855	-8.06248	7.47649e-16	8.59137e-15
GPRC5C	373.267	-1.7508	0.217177	-8.06166	7.52669e-16	8.64342e-15
ZNF730	82.1111	2.41652	0.299797	8.06054	7.59607e-16	8.71741e-15
RP1-228H13.5	31.8222	2.15624	0.267556	8.05901	7.69119e-16	8.81509e-15
FYN	831.644	1.73202	0.215031	8.05474	7.96454e-16	9.12246e-15
ARHGEF38	203.244	-4.08	0.506935	-8.04837	8.39061e-16	9.60423e-15
SDPR	405.289	-1.60401	0.199402	-8.04409	8.6886e-16	9.93886e-15
EME1	21.8889	2.48534	0.30897	8.04395	8.69851e-16	9.94373e-15
TBC1D31	184.933	1.01306	0.125966	8.04233	8.81492e-16	1.00665e-14
LINC00659	14.5333	-3.56207	0.442917	-8.04229	8.81732e-16	1.00665e-14
SH3TC1	426.356	-1.66894	0.207539	-8.04159	8.86833e-16	1.01182e-14
KSR2	147.889	-2.86617	0.356508	-8.03956	9.01608e-16	1.02801e-14
FRMD3	408.2	-2.25938	0.281067	-8.03858	9.08859e-16	1.03561e-14
NUPR1L	8.33333	-3.89106	0.484066	-8.03829	9.11045e-16	1.03743e-14
MVK	104.667	-1.33832	0.16651	-8.03744	9.17357e-16	1.04394e-14
COMTD1	26.2889	-2.10651	0.262117	-8.03649	9.24462e-16	1.05134e-14
NAV1	1006.98	1.36364	0.169795	8.03112	9.65894e-16	1.09705e-14
PDGFC	707.044	1.40449	0.174885	8.03096	9.67152e-16	1.09777e-14
ELF3	277.489	-3.40921	0.424585	-8.02951	9.78628e-16	1.10979e-14
CPSF6	2454.2	1.07043	0.133329	8.0285	9.86735e-16	1.11783e-14
CLCN5	455.6	-2.02216	0.252039	-8.0232	1.03022e-15	1.16634e-14
PLA1A	33.5556	-2.46866	0.307771	-8.02111	1.04791e-15	1.18561e-14
TMEM130	21.6444	3.13332	0.39076	8.01852	1.0703e-15	1.21017e-14
SPINT1	339.689	-2.65857	0.331573	-8.01807	1.07421e-15	1.21381e-14
IRX5	50.3111	-3.45787	0.431288	-8.01755	1.07876e-15	1.21817e-14
BMP1	323.578	1.62701	0.203056	8.0126	1.12309e-15	1.26742e-14
CRAT	234.622	-1.31251	0.163851	-8.01038	1.14352e-15	1.28882e-14
MAD2L1	69.1556	2.59139	0.323514	8.01014	1.1458e-15	1.29057e-14
ICA1	272.556	-2.22779	0.278132	-8.00983	1.14872e-15	1.29302e-14
N4BP2	850.756	1.31762	0.164509	8.00943	1.15245e-15	1.2964e-14
CLCN2	72.4667	-1.26641	0.158131	-8.00859	1.16033e-15	1.30443e-14
GALNT11	1053.64	-1.28199	0.160118	-8.00656	1.17962e-15	1.32358e-14
ADAMTSL2	168.467	-2.04967	0.256037	-8.00537	1.19111e-15	1.33477e-14
FAT3	1216.98	2.87109	0.358644	8.0054	1.19082e-15	1.33477e-14
ECH1	245.333	-1.03432	0.12921	-8.00495	1.1951e-15	1.33839e-14
HBEGF	214.733	-1.90891	0.238546	-8.00229	1.2213e-15	1.36599e-14
GALK1	58.6889	-1.45589	0.181933	-8.0023	1.22116e-15	1.36599e-14
RPL7L1P9	36.9778	-1.98558	0.248167	-8.00098	1.23431e-15	1.37967e-14
METTL7A	1330.89	-1.7004	0.21257	-7.99926	1.25169e-15	1.39821e-14
MPC2	281.378	-1.39948	0.175053	-7.9946	1.29999e-15	1.45125e-14
SOWAHB	45.0667	-2.84934	0.356461	-7.99339	1.31279e-15	1.46461e-14
ASB13	140.511	-1.30607	0.163409	-7.99267	1.32052e-15	1.4723e-14
STMN1	837.4	1.79076	0.224056	7.99246	1.32268e-15	1.47378e-14
GLYCTK	174.711	-1.59419	0.199521	-7.99009	1.34837e-15	1.50144e-14
AC009948.5	148.778	1.1701	0.146458	7.9893	1.35706e-15	1.51017e-14
C6orf123	20.0222	-3.21121	0.401945	-7.98918	1.35837e-15	1.51067e-14
GRB7	188.867	-2.62887	0.32935	-7.982	1.43977e-15	1.60019e-14
SDHD	403.133	-1.13329	0.141987	-7.98165	1.44394e-15	1.60381e-14
ERBB3	655.889	-3.44622	0.431858	-7.98	1.46329e-15	1.62428e-14
CTC-360G5.9	54.4	-1.81981	0.228429	-7.96666	1.63024e-15	1.80732e-14
SLC7A8	921.911	-1.663	0.20877	-7.96571	1.64279e-15	1.82009e-14
ABCC6P2	18.8667	-3.23255	0.405873	-7.96444	1.65978e-15	1.83775e-14
ARHGAP24	1046.91	-1.7878	0.224481	-7.96415	1.66367e-15	1.84091e-14
ACACB	1442.82	-1.4904	0.187162	-7.96318	1.6767e-15	1.85416e-14
ETV1	401.911	2.6271	0.329923	7.96278	1.68213e-15	1.859e-14
LEPREL1	707.222	-1.76963	0.222361	-7.95835	1.74347e-15	1.92557e-14
SPAST	320.422	1.06429	0.133754	7.95702	1.76239e-15	1.94526e-14
RGMA	101.978	2.43333	0.306023	7.95146	1.84324e-15	2.03322e-14
C2orf40	46.3778	-3.75038	0.471739	-7.95011	1.86351e-15	2.05429e-14
PCDHB3	17.2667	2.86082	0.359902	7.94889	1.88195e-15	2.07333e-14
AL136376.1	14.5778	-2.47515	0.311453	-7.94712	1.90897e-15	2.10178e-14
NUDT8	13.7111	-2.47691	0.311799	-7.94393	1.9588e-15	2.15529e-14
DCLRE1B	61.3111	1.15752	0.14573	7.94286	1.97565e-15	2.17248e-14
MAL2	859.378	-2.72926	0.343947	-7.93513	2.1027e-15	2.31074e-14
MTFR1L	401.422	-1.12211	0.141447	-7.93305	2.13835e-15	2.34845e-14
RPSA	2015.91	1.03595	0.130666	7.92826	2.22235e-15	2.43919e-14
FLRT2	1230.71	2.4405	0.307843	7.92774	2.23175e-15	2.44798e-14
ALB	36.2444	-2.94164	0.371092	-7.92699	2.24525e-15	2.46125e-14
TBC1D24	259.844	-1.29907	0.163899	-7.92602	2.26288e-15	2.47904e-14
TMCC1-AS1	37.3778	1.82359	0.230148	7.92353	2.30855e-15	2.52749e-14
CHRNA5	22.9556	3.4181	0.431397	7.92334	2.31218e-15	2.5299e-14
RP11-292B8.1	34.9111	-2.2544	0.284543	-7.92287	2.32093e-15	2.53633e-14
RBBP8	807.889	-1.63753	0.206682	-7.92292	2.31993e-15	2.53633e-14
CHSY3	32.1111	1.91039	0.241214	7.91992	2.37654e-15	2.59548e-14
KDELC1	118.756	1.27353	0.160902	7.91496	2.47338e-15	2.69957e-14
GSG2	12.8889	3.10587	0.39255	7.91204	2.53207e-15	2.76192e-14
C1RL-AS1	188.778	1.72328	0.217874	7.90953	2.5836e-15	2.81638e-14
C6orf136	53.1333	-1.33713	0.169115	-7.90662	2.64463e-15	2.88112e-14
ZC2HC1C	30.5333	-1.87174	0.236764	-7.90553	2.66803e-15	2.90482e-14
GRHPR	428.622	-1.14494	0.144836	-7.90513	2.67655e-15	2.9123e-14
NAAA	208.622	-1.41366	0.178845	-7.90437	2.69301e-15	2.9284e-14
C21orf33	498.444	-1.08386	0.137138	-7.90347	2.71237e-15	2.94763e-14
FMOD	477.733	2.27269	0.287567	7.90316	2.71914e-15	2.95317e-14
NEDD4L	2564.82	-1.87335	0.237055	-7.90258	2.73191e-15	2.96521e-14
KCNJ13	33.9556	-4.37708	0.553925	-7.90195	2.74574e-15	2.97838e-14
PTPRO	538.911	-3.00563	0.380474	-7.89969	2.79608e-15	3.03112e-14
Z97634.3	37.1778	-2.90953	0.368371	-7.89837	2.8258e-15	3.06145e-14
ZNF660	194.644	1.46728	0.185807	7.8968	2.86158e-15	3.09831e-14
DNAH2	56.1556	2.22041	0.281343	7.89219	2.96941e-15	3.21112e-14
CMTM7	138.422	1.59358	0.202051	7.88701	3.09524e-15	3.34514e-14
BCAM	1464.51	-2.21783	0.281296	-7.88432	3.16257e-15	3.41372e-14
DIAPH1	1161.11	-1.11142	0.14097	-7.8841	3.16814e-15	3.41763e-14
SMIM2-IT1	16.8444	4.02775	0.510895	7.88372	3.17767e-15	3.42581e-14
DLEU2	275.356	1.62905	0.206671	7.88235	3.21289e-15	3.45744e-14
MCF2L	876.2	-1.83793	0.23317	-7.88236	3.21242e-15	3.45744e-14
SERPINA4	7.93333	-4.36784	0.554129	-7.88236	3.21247e-15	3.45744e-14
TMEM8A	282.156	-1.40668	0.178508	-7.88021	3.26825e-15	3.51272e-14
AMFR	1229.6	-1.24351	0.157815	-7.8795	3.28681e-15	3.53051e-14
IRX3	63.8889	-2.94968	0.374386	-7.87873	3.30721e-15	3.55026e-14
MIDN	616	-1.08634	0.137888	-7.8784	3.31598e-15	3.55751e-14
TNK1	20.4444	-2.19806	0.279084	-7.87599	3.38063e-15	3.62466e-14
UBE2FP2	9.77778	-3.83894	0.487492	-7.87488	3.41065e-15	3.65463e-14
SMPD1	186.267	-1.19297	0.151575	-7.87047	3.53301e-15	3.78343e-14
TBC1D4	1341.56	-1.25654	0.159664	-7.86989	3.54946e-15	3.79874e-14
PRLR	605.622	-2.54619	0.323581	-7.86879	3.58091e-15	3.83008e-14
CD9	782.844	-1.7546	0.223009	-7.86784	3.60815e-15	3.85687e-14
JAZF1	107.822	1.45726	0.185259	7.86605	3.6602e-15	3.91014e-14
KIAA1024	39.9556	2.20405	0.280263	7.86424	3.71358e-15	3.96475e-14
IQCJ-SCHIP1	40.2444	-2.00338	0.255042	-7.85508	3.99511e-15	4.26274e-14
SLC35D2	140.2	-1.03231	0.131464	-7.85239	4.08184e-15	4.35264e-14
CAMSAP3	117.089	-2.94784	0.375451	-7.85147	4.112e-15	4.38215e-14
CMBL	458.422	-2.03074	0.258711	-7.84948	4.17759e-15	4.44936e-14
MT-TI	22.8667	-3.20269	0.408045	-7.84886	4.19843e-15	4.46885e-14
ZNF209P	17.5556	-4.68338	0.596708	-7.84869	4.20404e-15	4.47213e-14
MT-TL1	14.5111	-2.93219	0.373734	-7.84567	4.3064e-15	4.57825e-14
NPHS1	488.889	-5.4763	0.698474	-7.84038	4.49178e-15	4.76957e-14
WDR62	51.0667	2.0684	0.263881	7.83837	4.56433e-15	4.84369e-14
DNAJC11	688.022	-1.2298	0.156978	-7.83419	4.71882e-15	5.00462e-14
RP3-399L15.3	30.4222	2.33077	0.297752	7.8279	4.96067e-15	5.25479e-14
DHDH	13.3111	-3.87523	0.495093	-7.82728	4.98531e-15	5.27772e-14
GLS	3413.62	-1.19049	0.152098	-7.82716	4.99014e-15	5.27966e-14
ASB15	39.2889	-5.31471	0.67906	-7.82656	5.01404e-15	5.29858e-14
TDG	335.889	1.01069	0.12918	7.82386	5.12266e-15	5.40688e-14
AADAT	109.111	1.34049	0.171365	7.82241	5.18233e-15	5.46658e-14
CAMK1D	303.911	1.47838	0.189185	7.81448	5.51912e-15	5.81837e-14
TMEM143	67.6444	-1.16927	0.149716	-7.80993	5.72176e-15	6.02838e-14
KCNAB3	46.9778	1.42196	0.182072	7.80986	5.72534e-15	6.02855e-14
GPR110	767.267	-3.20216	0.410115	-7.80797	5.81183e-15	6.11596e-14
SEMA3G	128.067	-2.25202	0.288499	-7.80598	5.90403e-15	6.20928e-14
SLC12A2	900.089	1.31487	0.16846	7.80525	5.93822e-15	6.24151e-14
TUFT1	443.267	-2.37391	0.304184	-7.8042	5.98808e-15	6.29016e-14
PLEKHA6	744.978	-2.06373	0.264503	-7.80228	6.07965e-15	6.38255e-14
PLIN4	29.6	-2.99503	0.383944	-7.80071	6.1558e-15	6.45864e-14
CYP2C9	16.5111	-4.21004	0.53972	-7.80042	6.17024e-15	6.46993e-14
AP000662.4	54.9778	2.14741	0.275327	7.79949	6.21586e-15	6.51389e-14
LINC00390	9.51111	3.84056	0.492723	7.79456	6.46316e-15	6.76902e-14
FBXO44	164.244	-1.57312	0.20184	-7.79389	6.49792e-15	6.80139e-14
RP11-180C16.1	41.4444	-2.5183	0.323373	-7.78761	6.82874e-15	7.14341e-14
CD47	1468.6	1.48286	0.190555	7.7818	7.14995e-15	7.47499e-14
KCNMA1	264.089	2.18457	0.280936	7.77603	7.48374e-15	7.81467e-14
RP11-617F23.1	88.2444	-1.99469	0.256541	-7.77532	7.52558e-15	7.84906e-14
PPARG	212.933	-1.7896	0.230178	-7.77486	7.55323e-15	7.87324e-14
MSH2	492.178	1.33202	0.171467	7.76836	7.951e-15	8.28295e-14
QDPR	225.267	-1.22981	0.158348	-7.7665	8.06819e-15	8.39733e-14
PRR15	46.4444	-3.59163	0.462453	-7.76647	8.07032e-15	8.39733e-14
PCDHB18	11.8222	2.6908	0.346608	7.76322	8.28e-15	8.61042e-14
SLC19A3	98.1333	-3.60252	0.46435	-7.7582	8.61416e-15	8.95262e-14
TNFAIP6	14.2444	3.67553	0.473805	7.75747	8.66422e-15	8.99853e-14
MTRNR2L12	6127.53	-1.98037	0.255287	-7.7574	8.66854e-15	8.99853e-14
KIAA1586	167.733	1.105	0.142463	7.75645	8.73423e-15	9.06138e-14
ZBTB7A	320.489	-1.02711	0.132432	-7.75574	8.78276e-15	9.101e-14
PNMA2	77.5556	2.25481	0.290833	7.75294	8.97909e-15	9.29898e-14
OVOL2	15.7333	-3.62296	0.467403	-7.75126	9.09836e-15	9.41696e-14
SALL2	198.778	1.64991	0.212884	7.75027	9.16989e-15	9.48543e-14
NBPF16	101.889	1.23803	0.15979	7.7479	9.34239e-15	9.65252e-14
CTSV	30.2222	-2.60129	0.336253	-7.73609	1.02519e-14	1.0586e-13
KIF3C	82.6444	1.61412	0.208675	7.73507	1.03347e-14	1.06653e-13
POLE2	67.4667	2.45421	0.31741	7.732	1.05872e-14	1.09195e-13
SLC25A23	267.578	-1.18732	0.153668	-7.72651	1.10533e-14	1.13868e-13
SDC1	475.133	-2.47603	0.320493	-7.72567	1.11262e-14	1.14553e-13
CNTNAP3B	109.378	-2.10039	0.271949	-7.72345	1.13222e-14	1.16502e-13
CPT1C	49.4667	2.57755	0.333824	7.72127	1.15173e-14	1.18441e-13
SLC22A14	20.9778	-2.95617	0.382916	-7.72015	1.16194e-14	1.19421e-13
RP1-80N2.2	14.0222	-3.44213	0.445881	-7.71984	1.1648e-14	1.19645e-13
SDHB	368.022	-1.23933	0.160555	-7.71903	1.17218e-14	1.20333e-13
MAP3K13	475.489	-1.05804	0.137088	-7.71794	1.18224e-14	1.21295e-13
CHCHD10	139.378	-2.14668	0.278164	-7.71729	1.18827e-14	1.21842e-13
KLHL23	202.933	1.21988	0.158076	7.71706	1.19048e-14	1.21998e-13
ECHS1	505.889	-1.47011	0.190593	-7.71333	1.22581e-14	1.25473e-13
SORD	200.089	-1.8158	0.235456	-7.71185	1.24005e-14	1.26856e-13
PITPNM1	289.378	-1.50802	0.195552	-7.7116	1.2425e-14	1.27033e-13
CYP27C1	55.3111	2.64267	0.342737	7.71049	1.25338e-14	1.28071e-13
IP6K3	55.8889	-2.80497	0.364025	-7.70544	1.30398e-14	1.33088e-13
BPHL	281.378	-1.2008	0.155864	-7.70414	1.3173e-14	1.34369e-13
LRP12	273.733	1.09692	0.142386	7.70381	1.32068e-14	1.34636e-13
MYO1C	933.156	-1.21178	0.157299	-7.70363	1.32255e-14	1.34748e-13
RALGPS1	458.489	-1.4416	0.187144	-7.70318	1.32722e-14	1.35146e-13
RPS15A	377.689	1.06528	0.138297	7.70283	1.33081e-14	1.35433e-13
RP11-532F12.5	32.4667	-2.67178	0.346892	-7.70203	1.33921e-14	1.3621e-13
C8orf46	45.7778	-2.03393	0.264253	-7.6969	1.39407e-14	1.41659e-13
GNG7	124.489	-2.04382	0.265539	-7.69687	1.3944e-14	1.41659e-13
NIPAL1	111.089	-2.41682	0.314218	-7.69152	1.45393e-14	1.47622e-13
CCM2L	36.9333	-1.99521	0.259411	-7.69128	1.45668e-14	1.47816e-13
GDF11	143.533	1.81683	0.236377	7.68614	1.51642e-14	1.5379e-13
RPL7L1P2	12.0444	-3.66708	0.477158	-7.68525	1.52695e-14	1.54768e-13
KPNA2	218.556	1.62783	0.211835	7.68442	1.53687e-14	1.55684e-13
TP53	266	1.07179	0.139503	7.68288	1.55547e-14	1.57478e-13
FAM64A	18.0222	4.03441	0.525266	7.68069	1.58239e-14	1.6002e-13
HAS2	340.089	2.95884	0.385488	7.67555	1.64704e-14	1.66462e-13
THRB	410.111	-1.76124	0.229481	-7.67489	1.65563e-14	1.67234e-13
BDH1	206.467	-1.77119	0.230792	-7.67438	1.66225e-14	1.67807e-13
PEG10	3058.44	2.49591	0.325238	7.67411	1.66571e-14	1.68059e-13
ATP6V0E2	101.467	-1.63674	0.21338	-7.67055	1.71255e-14	1.72686e-13
IER2	1103.56	-1.55901	0.203299	-7.66857	1.73925e-14	1.75279e-13
GINS1	110.022	2.00783	0.261887	7.66676	1.76402e-14	1.77672e-13
EBNA1BP2	285.556	-1.48505	0.193708	-7.66647	1.76796e-14	1.77967e-13
LSAMP	453.311	2.25533	0.294284	7.66378	1.80535e-14	1.81525e-13
CCSAP	148.489	1.18977	0.155298	7.66124	1.84149e-14	1.84947e-13
SCPEP1	316.867	-1.16336	0.151869	-7.66029	1.85512e-14	1.8621e-13
LPL	334.244	-2.58716	0.33776	-7.65977	1.86272e-14	1.86866e-13
S100A6	662.8	-1.9913	0.259976	-7.65954	1.86595e-14	1.87084e-13
RBPMS	1818.53	-1.36413	0.178117	-7.65863	1.87931e-14	1.88316e-13
RP11-705C15.3	256.822	1.56656	0.204686	7.6535	1.95589e-14	1.95878e-13
LRRC4C	108.178	2.23588	0.292175	7.65254	1.97049e-14	1.97228e-13
SAT2	215.356	-1.46419	0.19138	-7.65067	1.9994e-14	2.00008e-13
PAK6	22.2889	-2.72076	0.355723	-7.64853	2.03286e-14	2.0324e-13
CERKL	56.9778	-3.57842	0.467977	-7.64656	2.0643e-14	2.06267e-13
GPR113	37.4222	-2.91538	0.381349	-7.64489	2.09117e-14	2.08832e-13
SCD5	378.356	-1.6096	0.210565	-7.64419	2.10264e-14	2.09859e-13
HSF2	229.978	1.2257	0.160352	7.64385	2.10829e-14	2.10303e-13
ZNF703	204.778	2.03067	0.265738	7.64163	2.14487e-14	2.13832e-13
ADAMTS2	445.933	2.20693	0.289172	7.63191	2.31303e-14	2.30466e-13
FCN3	15	-3.65746	0.479678	-7.62483	2.44361e-14	2.43339e-13
UBE2E3	515.8	1.07122	0.140496	7.62459	2.44809e-14	2.43648e-13
JPH4	86.6222	2.11561	0.277489	7.6241	2.45734e-14	2.4443e-13
CES4A	61.1333	-2.16007	0.283331	-7.62384	2.46232e-14	2.44786e-13
TBC1D32	476.067	1.3126	0.172189	7.62302	2.47809e-14	2.46216e-13
TMEM101	210.111	-1.23418	0.161969	-7.61984	2.53987e-14	2.5207e-13
SLC37A4	108.244	-1.77214	0.23261	-7.6185	2.56645e-14	2.54564e-13
ZNF503-AS1	10.8889	-2.5395	0.333486	-7.61501	2.63672e-14	2.61387e-13
SPARC	9501.31	1.7232	0.226294	7.61487	2.63963e-14	2.61528e-13
ZNF165	47.4	-2.31882	0.304578	-7.61321	2.67368e-14	2.64753e-13
KIF5C	96.3333	1.70958	0.224568	7.61275	2.6833e-14	2.65556e-13
GPX8	298.022	2.17896	0.286292	7.61098	2.7202e-14	2.69057e-13
MRPL34	133.378	-1.20698	0.158618	-7.60932	2.75544e-14	2.72389e-13
MPST	190.467	-1.18761	0.156085	-7.60874	2.76784e-14	2.73462e-13
CLEC2D	283.067	1.4635	0.192347	7.60865	2.76969e-14	2.73491e-13
MYO9A	2842.09	-1.06994	0.140628	-7.60829	2.7775e-14	2.74109e-13
ETV5	354.889	1.65897	0.218207	7.60274	2.89915e-14	2.85955e-13
TNS1	4590.58	-1.47363	0.193843	-7.6022	2.91143e-14	2.87004e-13
MT-TP	39.8889	-2.81982	0.370961	-7.60141	2.92916e-14	2.88591e-13
CCDC138	130.089	1.29865	0.170865	7.60043	2.95139e-14	2.90619e-13
PAFAH1B3	64.0444	1.20497	0.158553	7.59978	2.96624e-14	2.91918e-13
CDC20	39.0444	3.13638	0.412764	7.59848	2.99629e-14	2.9471e-13
STXBP5	634.089	1.41881	0.186771	7.59652	3.04193e-14	2.99033e-13
ABHD6	169	-1.60126	0.210829	-7.59504	3.07702e-14	3.02313e-13
CDC25A	40.5333	2.08594	0.274655	7.59476	3.08367e-14	3.02797e-13
TRIP13	46.2667	1.39954	0.184316	7.59316	3.12195e-14	3.06334e-13
RAB11FIP4	289.311	-1.61401	0.212582	-7.5924	3.14043e-14	3.07857e-13
TYRP1	60.2222	-3.02445	0.39837	-7.59207	3.14837e-14	3.08464e-13
TBXA2R	28.4667	-2.06884	0.272584	-7.58972	3.20599e-14	3.13934e-13
EPCAM	979.822	-2.90556	0.383091	-7.58453	3.33706e-14	3.26224e-13
FAM102A	480.978	-1.48816	0.196216	-7.58428	3.34337e-14	3.2666e-13
ITGA2	840.467	-2.17481	0.286782	-7.58351	3.3634e-14	3.283e-13
NEK8	95.4667	-1.46384	0.19303	-7.58349	3.36388e-14	3.283e-13
SEC24D	666.156	1.39912	0.184545	7.58147	3.41668e-14	3.33268e-13
GOT2	514.289	-1.06413	0.140367	-7.58107	3.42717e-14	3.34106e-13
SCN2A	429.778	-3.0966	0.408528	-7.5799	3.45815e-14	3.3694e-13
MT2A	516.467	-2.08203	0.27473	-7.57845	3.49696e-14	3.40533e-13
NUDT16	402.911	-1.07948	0.14264	-7.56785	3.79465e-14	3.69114e-13
MTRNR2L2	2542.93	-2.01096	0.265813	-7.5653	3.86971e-14	3.76208e-13
FAM110C	199.067	-2.41378	0.319196	-7.56208	3.96665e-14	3.85419e-13
NNT	1336.98	-1.00761	0.133279	-7.56019	4.02466e-14	3.90625e-13
FRMPD3	10.6667	3.14693	0.416348	7.55842	4.07989e-14	3.95767e-13
PFKFB2	446.267	-1.47355	0.194966	-7.55802	4.09245e-14	3.96767e-13
SLC25A4	187.8	-1.73819	0.230012	-7.55694	4.12653e-14	3.99851e-13
RNF148	45.5778	-2.18852	0.289622	-7.55647	4.14144e-14	4.01076e-13
AC034193.5	81.3111	1.69705	0.22474	7.55118	4.31328e-14	4.17258e-13
TMEM108	65.6	3.01866	0.399758	7.5512	4.31252e-14	4.17258e-13
LEPRE1	254.422	1.10977	0.147061	7.54636	4.47578e-14	4.32741e-13
KIF2C	65.5111	2.60484	0.34525	7.54479	4.53032e-14	4.37774e-13
GRM7	45.9556	3.8745	0.513697	7.54239	4.6143e-14	4.45644e-13
TRHDE-AS1	317.933	-3.11608	0.413156	-7.54212	4.62389e-14	4.46326e-13
FGD1	153.844	1.37802	0.182784	7.53902	4.73517e-14	4.56817e-13
LCN12	62.0222	-3.02788	0.401763	-7.5365	4.8277e-14	4.65488e-13
STPG2	50.9778	-1.55718	0.206695	-7.5337	4.93211e-14	4.75036e-13
SLC51B	9.84444	-4.27294	0.567199	-7.5334	4.94353e-14	4.75875e-13
LEF1	292.267	1.93482	0.256882	7.53194	4.99916e-14	4.80539e-13
PRUNE2	844.889	-2.0612	0.273661	-7.53195	4.99865e-14	4.80539e-13
MRO	64.6	-2.3899	0.317304	-7.53191	5.00016e-14	4.80539e-13
DDN	50.1333	-4.84785	0.643659	-7.5317	5.00852e-14	4.8108e-13
KATNAL1	466.867	1.20875	0.160518	7.5303	5.06236e-14	4.85987e-13
MAN1A1	1287.02	-2.0866	0.277168	-7.52828	5.14146e-14	4.93311e-13
TCEAL7	68.0889	2.59284	0.344439	7.52771	5.16364e-14	4.9517e-13
FGD5	355.067	-1.62763	0.216283	-7.52546	5.25351e-14	5.0324e-13
TXLNB	120.311	3.27621	0.435377	7.525	5.27201e-14	5.04738e-13
KANSL1L	951.733	-1.12846	0.149981	-7.52404	5.31083e-14	5.07902e-13
CTB-119C2.1	53.8	-1.48003	0.196706	-7.52406	5.31007e-14	5.07902e-13
HSPA4L	333	-1.79731	0.238884	-7.52377	5.32204e-14	5.08698e-13
RP11-752D24.2	31.5556	-3.07025	0.408213	-7.52121	5.42728e-14	5.18178e-13
CHP1	640.422	-1.1336	0.150722	-7.52114	5.43005e-14	5.18178e-13
CHAD	17.1333	-2.69445	0.358248	-7.52119	5.42783e-14	5.18178e-13
MAFK	232.4	-1.749	0.232617	-7.51881	5.52749e-14	5.27192e-13
ZNF69	203.867	-1.18934	0.158187	-7.51856	5.53828e-14	5.27935e-13
CTC-471F3.4	23.1556	-1.62642	0.21635	-7.51755	5.58138e-14	5.31755e-13
PAK4	222.156	-1.1155	0.148418	-7.51593	5.65073e-14	5.38072e-13
AFF3	656.667	2.14703	0.285763	7.51332	5.76471e-14	5.48629e-13
SLC26A7	1013.71	-4.29679	0.572008	-7.51177	5.83336e-14	5.54563e-13
CCDC162P	79.8222	-2.57497	0.34282	-7.51116	5.86053e-14	5.56845e-13
CYC1	287.289	-1.05779	0.140918	-7.50641	6.07687e-14	5.76779e-13
MT-TV	315.711	-2.41745	0.322066	-7.50606	6.09352e-14	5.78048e-13
CHMP4BP1	76.3556	-1.82431	0.243069	-7.5053	6.12873e-14	5.81075e-13
CTD-2611O12.6	15	-2.16593	0.288636	-7.50402	6.18913e-14	5.86486e-13
GALNT1	519.444	1.13605	0.151406	7.50331	6.22258e-14	5.89022e-13
GALNT15	94.8667	-1.9829	0.264545	-7.49552	6.60385e-14	6.24777e-13
RP11-285G1.9	14.3556	-4.39664	0.586706	-7.49376	6.69288e-14	6.32521e-13
TRAF4	364.267	-1.14936	0.153374	-7.49381	6.69011e-14	6.32521e-13
RFC2	82.5111	1.08506	0.144803	7.49333	6.71458e-14	6.34016e-13
STIL	128.4	1.73606	0.231743	7.49134	6.81759e-14	6.43271e-13
CASC14	20.6222	2.68331	0.358289	7.48921	6.92877e-14	6.53411e-13
IER3	91.4889	-2.11374	0.282298	-7.48763	7.01293e-14	6.60994e-13
G0S2	164	-2.39098	0.319531	-7.4828	7.2758e-14	6.85404e-13
MYO5B	533.289	-2.2633	0.302858	-7.47316	7.82938e-14	7.36371e-13
LSM11	102.867	1.13514	0.15191	7.47247	7.87006e-14	7.39802e-13
HELLS	665.844	1.85605	0.248396	7.47213	7.89063e-14	7.4134e-13
CYP27B1	85.0444	-2.92736	0.391808	-7.47142	7.9336e-14	7.44981e-13
GPR158	51.4667	3.34877	0.44839	7.46842	8.11627e-14	7.61322e-13
KIAA0922	580.356	1.14014	0.152686	7.46726	8.18847e-14	7.67685e-13
CNOT2	1243.76	1.14802	0.153833	7.46277	8.47221e-14	7.93865e-13
ZNF724P	82.7111	1.49234	0.200024	7.46082	8.59863e-14	8.04854e-13
ZNF436	243.956	1.16035	0.155581	7.45814	8.77528e-14	8.207e-13
SLC15A2	352.4	-1.99778	0.267866	-7.45811	8.77724e-14	8.207e-13
TPRG1L	326.778	-1.07282	0.14385	-7.45787	8.79341e-14	8.21776e-13
ANKDD1A	69.9778	1.38062	0.185168	7.45607	8.91395e-14	8.32599e-13
VDR	182.689	-2.72219	0.365179	-7.45438	9.02903e-14	8.42015e-13
APOBEC3C	147.622	2.04183	0.27391	7.45438	9.0291e-14	8.42015e-13
RP11-379K17.12	20.4889	-2.36814	0.317747	-7.45289	9.13144e-14	8.51108e-13
RP11-379F4.4	99.9556	1.79913	0.241461	7.451	9.26358e-14	8.62968e-13
YEATS2	911.289	1.01328	0.136037	7.44857	9.43563e-14	8.78531e-13
ZDHHC11	109.444	-1.97261	0.264999	-7.44384	9.78e-14	9.10113e-13
EML2	89.9333	-1.18016	0.158558	-7.44306	9.83768e-14	9.14998e-13
BOC	846.956	2.14272	0.28799	7.44025	1.00495e-13	9.34204e-13
PHYHD1	144.111	-1.36917	0.184062	-7.43863	1.01733e-13	9.45211e-13
ZDHHC11B	84.0444	-2.18874	0.294383	-7.43502	1.04553e-13	9.709e-13
ROR1	275.511	1.51301	0.203505	7.43477	1.04753e-13	9.71735e-13
HIST1H2BE	140.133	2.12394	0.285689	7.43446	1.04998e-13	9.73497e-13
PDPN	83.7111	2.27683	0.306278	7.43387	1.05464e-13	9.77304e-13
TMEM98	457.244	1.32338	0.178038	7.4331	1.06078e-13	9.82479e-13
NBEAL1	1771.64	-1.08393	0.145897	-7.42945	1.09053e-13	1.0095e-12
STAC2	38.5333	-2.58398	0.34787	-7.428	1.10251e-13	1.02006e-12
CELF2	675.356	1.91702	0.258226	7.42379	1.13815e-13	1.05248e-12
LRRC43	29.3556	-1.53918	0.207359	-7.42278	1.14686e-13	1.05998e-12
RACGAP1	227.4	1.55848	0.210061	7.41918	1.17844e-13	1.08802e-12
NPSR1-AS1	22.4667	-3.32078	0.447718	-7.41712	1.19695e-13	1.10395e-12
GLIS2	335.844	-1.30808	0.176386	-7.41601	1.20701e-13	1.11265e-12
APCDD1L	49.4889	-2.89618	0.390601	-7.41468	1.21917e-13	1.12327e-12
PPFIA2	82.0667	-2.58633	0.348858	-7.41371	1.22817e-13	1.13097e-12
ASF1B	30.9778	2.59003	0.349431	7.41215	1.24264e-13	1.1437e-12
DHCR24	393.289	-2.17359	0.293384	-7.40868	1.27563e-13	1.17283e-12
HIST1H4A	53.6222	2.89648	0.391146	7.40512	1.31032e-13	1.20348e-12
SYNGR3	9.75556	-2.6158	0.353278	-7.40437	1.31772e-13	1.20964e-12
C6orf58	10.8	2.32295	0.313819	7.40219	1.33953e-13	1.22838e-12
CCDC109B	60.9111	1.59391	0.215346	7.40162	1.34534e-13	1.23242e-12
ZNF678	471.578	1.20815	0.163249	7.40066	1.35513e-13	1.2401e-12
NHEJ1	25.1556	-1.99388	0.269446	-7.39992	1.36268e-13	1.24628e-12
CHML	391.2	1.16075	0.156867	7.39961	1.36583e-13	1.24795e-12
PROSER2	92.5778	-2.31898	0.313533	-7.39628	1.40051e-13	1.27897e-12
FMO1	315.867	-4.08711	0.552613	-7.39597	1.40385e-13	1.28135e-12
FGD4	1041.18	-1.28111	0.173294	-7.3927	1.43873e-13	1.31251e-12
CCNF	67.4444	1.59357	0.215656	7.38942	1.47473e-13	1.34396e-12
SGMS2	452.444	-1.88895	0.255804	-7.38435	1.53199e-13	1.3947e-12
CLIP3	169.311	1.14431	0.154982	7.38351	1.54166e-13	1.40278e-12
HIST1H2BF	174.622	2.24357	0.303938	7.38168	1.56307e-13	1.42153e-12
WDR91	621.311	-1.49772	0.20301	-7.37757	1.61199e-13	1.46526e-12
LRCH2	78.0667	1.29224	0.175165	7.37727	1.61568e-13	1.46786e-12
CHST1	188.267	2.59884	0.352325	7.37624	1.62825e-13	1.47852e-12
STAP1	48.4667	-3.83504	0.520404	-7.36935	1.71468e-13	1.55459e-12
IGSF6	54.9778	2.66674	0.361927	7.36818	1.7298e-13	1.56749e-12
RP1-90J20.12	55.6	-1.73015	0.234935	-7.36437	1.77982e-13	1.612e-12
MIR2276	9.28889	-2.61505	0.355648	-7.35292	1.93919e-13	1.75363e-12
MAPRE1P3	16.8444	-3.60121	0.489952	-7.35013	1.98012e-13	1.78973e-12
AC019181.3	25.2	-2.63083	0.357948	-7.34975	1.98573e-13	1.79388e-12
ITGA6	1445.07	-1.34032	0.182366	-7.34963	1.98755e-13	1.7946e-12
SLC2A4RG	191.311	-1.74075	0.236948	-7.34656	2.03374e-13	1.83537e-12
CLIC5	640.978	-3.29933	0.449176	-7.3453	2.05298e-13	1.85178e-12
GRIP2	91.5778	-3.1904	0.434372	-7.34487	2.05967e-13	1.85686e-12
PHF17	687.244	-1.00925	0.137419	-7.34433	2.06794e-13	1.86284e-12
KLC3	13.1111	-2.97708	0.40536	-7.3443	2.06841e-13	1.86284e-12
TMSB10	342.644	1.35793	0.184902	7.34406	2.07214e-13	1.86524e-12
RP11-341G5.1	17.2444	-2.88019	0.39226	-7.34254	2.09574e-13	1.88552e-12
RSAD1	309.667	-1.2127	0.165212	-7.34027	2.13156e-13	1.91579e-12
GPER1	46.6889	-2.16344	0.294934	-7.33535	2.21135e-13	1.9865e-12
ABCD3	845.978	-1.0485	0.142949	-7.33474	2.22149e-13	1.99459e-12
APAF1	542.889	1.13798	0.155174	7.33358	2.24078e-13	2.01088e-12
OCLN	174.844	-2.36106	0.322095	-7.33032	2.29609e-13	2.05946e-12
ZNF92	149.133	1.28545	0.175418	7.32793	2.33741e-13	2.09546e-12
LINC01036	17.5556	2.76577	0.377544	7.32569	2.37669e-13	2.1296e-12
SLC9B2	64.2667	1.6384	0.223741	7.32275	2.42936e-13	2.17568e-12
ADRB1	37.7333	-3.39478	0.463598	-7.32268	2.43069e-13	2.17576e-12
RP11-380M21.2	68.5111	-1.59627	0.218022	-7.32158	2.45061e-13	2.19248e-12
DNM3OS	269.844	3.01619	0.411989	7.32104	2.46052e-13	2.20023e-12
ITGA4	362.333	1.79785	0.245579	7.32087	2.46374e-13	2.20199e-12
ZNF286A	248.089	1.17348	0.160302	7.32042	2.47188e-13	2.20815e-12
TMPO	1289.71	1.5051	0.205789	7.31384	2.59622e-13	2.3157e-12
ACADM	605.889	-1.32925	0.181786	-7.31217	2.62856e-13	2.34335e-12
EML6	201.422	-2.06947	0.283035	-7.31171	2.63767e-13	2.35029e-12
CYP4A22-AS1	13.2667	-3.02849	0.414462	-7.30704	2.73097e-13	2.43096e-12
BCMO1	22.2667	-2.24114	0.306764	-7.30573	2.75775e-13	2.45357e-12
KDM5B	1560.64	1.09384	0.14974	7.30495	2.77373e-13	2.46653e-12
PSD3	986.689	1.40638	0.192567	7.30334	2.80707e-13	2.49492e-12
NFIX	501.156	1.74466	0.238917	7.30235	2.82789e-13	2.51216e-12
RFC3	231.489	1.55827	0.213411	7.30171	2.84138e-13	2.52287e-12
RP11-236J17.5	26.4444	-3.56511	0.488341	-7.30046	2.86791e-13	2.54515e-12
OIP5	11.7111	2.75418	0.377388	7.29802	2.92037e-13	2.59039e-12
C1orf21	493.956	1.11169	0.152335	7.29769	2.92761e-13	2.59551e-12
ST3GAL6-AS1	9.6	-2.36294	0.3239	-7.29529	2.98018e-13	2.64078e-12
SETD7	740	1.01705	0.139481	7.29164	3.06213e-13	2.71204e-12
HSD17B8	22.5556	-1.60161	0.219776	-7.28747	3.15833e-13	2.79583e-12
ADCY7	226.533	1.78212	0.244606	7.28569	3.20036e-13	2.83162e-12
SGPP1	276.089	-1.38545	0.190189	-7.28458	3.22669e-13	2.85233e-12
RIPK4	253.911	-2.69639	0.370151	-7.28457	3.22701e-13	2.85233e-12
SCARNA21	1169.87	1.36464	0.187338	7.28437	3.23166e-13	2.85501e-12
COL8A2	41.7556	2.74584	0.377094	7.28157	3.29945e-13	2.91198e-12
RP11-404P21.9	22.2222	-3.87707	0.532469	-7.28131	3.30604e-13	2.91487e-12
ZNF300	267.889	1.11904	0.153708	7.28031	3.33059e-13	2.93359e-12
MYH14	258.889	-2.86062	0.393001	-7.27891	3.36526e-13	2.96264e-12
RPL32	2284.78	1.00918	0.138656	7.27831	3.3802e-13	2.97282e-12
IRX1	144.6	-5.24321	0.720473	-7.27745	3.4018e-13	2.99032e-12
ZNF492	42.2	1.87141	0.257203	7.276	3.4386e-13	3.02117e-12
PECR	160.756	-1.44014	0.197933	-7.2759	3.44118e-13	3.02178e-12
CALU	1336	1.20379	0.16545	7.27584	3.44273e-13	3.02178e-12
RFX3	814.578	1.14174	0.15693	7.27548	3.45179e-13	3.02823e-12
RP11-75L1.2	39.3111	1.22486	0.168383	7.27427	3.48291e-13	3.054e-12
ARHGEF28	1800.16	-1.24776	0.17158	-7.27218	3.53743e-13	3.09872e-12
PKNOX2	132.822	1.42597	0.196128	7.2706	3.57889e-13	3.13349e-12
RAB7L1	251.2	-1.86414	0.256474	-7.26834	3.63922e-13	3.18473e-12
LIN9	94.4	1.50381	0.206922	7.26751	3.6617e-13	3.20281e-12
CENPO	109	1.2994	0.17881	7.26693	3.67751e-13	3.21504e-12
SLC22A18	121.489	-2.09055	0.287761	-7.26489	3.73355e-13	3.26241e-12
RP11-3K16.2	160.267	-3.22593	0.444151	-7.26315	3.78169e-13	3.30121e-12
RRAGD	603.022	-1.77598	0.244562	-7.26189	3.8171e-13	3.33046e-12
ARMC4	18.4	2.86263	0.394349	7.25911	3.89638e-13	3.39795e-12
AC006427.2	19.2222	-2.17778	0.300049	-7.25809	3.92593e-13	3.42203e-12
SEMA4G	105.267	-1.68325	0.231928	-7.25764	3.93914e-13	3.43184e-12
C11orf85	8.11111	-4.0662	0.560275	-7.25751	3.94271e-13	3.43326e-12
SUSD3	36.4222	-1.88103	0.25919	-7.25734	3.94771e-13	3.43591e-12
HIST1H2AE	449.044	1.92631	0.265764	7.24819	4.22363e-13	3.67425e-12
FNIP2	1439	-1.15739	0.159757	-7.24469	4.33422e-13	3.76859e-12
CILP	180.378	2.60255	0.359526	7.23885	4.52509e-13	3.93261e-12
MECOM	2384.24	-2.84779	0.393429	-7.23839	4.54056e-13	3.94305e-12
CYP3A5	353.133	-2.73814	0.378282	-7.23836	4.54158e-13	3.94305e-12
MLYCD	159.6	-1.16153	0.160507	-7.23665	4.59908e-13	3.99101e-12
MEIS1	1615.69	2.09158	0.289054	7.23596	4.62234e-13	4.00921e-12
LIMK1	97.0444	1.32723	0.18347	7.23402	4.68891e-13	4.06495e-12
RP11-503C24.6	12.6222	-4.0812	0.564254	-7.23291	4.72735e-13	4.09626e-12
MCOLN3	143.111	-1.7943	0.248095	-7.23232	4.74804e-13	4.11216e-12
PAIP2B	227.711	-1.20543	0.166759	-7.22858	4.88056e-13	4.22279e-12
FANCG	62.7778	1.06778	0.147739	7.22748	4.92027e-13	4.25506e-12
PSRC1	39.0667	1.58439	0.219279	7.22541	4.99575e-13	4.31821e-12
AC112229.1	20.2889	-2.15014	0.29762	-7.22444	5.03167e-13	4.34713e-12
RP11-31F15.1	53.3111	1.83541	0.254123	7.2225	5.104e-13	4.40746e-12
MAST4-IT1	8.73333	-2.40015	0.332438	-7.21983	5.20539e-13	4.49281e-12
ST6GALNAC5	36.3778	2.89792	0.401402	7.21949	5.21817e-13	4.50163e-12
ZNF366	53.2889	-1.88583	0.261222	-7.21924	5.228e-13	4.5079e-12
DUSP4	129.889	2.09182	0.28978	7.21864	5.25095e-13	4.52547e-12
RSPO3	292.333	3.14962	0.436334	7.21837	5.26149e-13	4.53234e-12
G2E3	426.578	1.09637	0.151915	7.21701	5.31417e-13	4.57549e-12
DONSON	122.622	1.08541	0.150418	7.21593	5.35658e-13	4.60975e-12
AC091492.2	22.0889	-1.98119	0.274658	-7.2133	5.46124e-13	4.69752e-12
SCD	393.733	1.75989	0.244051	7.21117	5.54728e-13	4.7692e-12
PLCB4	490.4	1.39195	0.193036	7.21086	5.56009e-13	4.77788e-12
TJP2	851.222	-1.47752	0.204906	-7.21072	5.56554e-13	4.78023e-12
MKLN1-AS1	332.356	-1.68462	0.233814	-7.20497	5.80556e-13	4.98395e-12
CD1D	24.5333	2.00643	0.278482	7.2049	5.80866e-13	4.98419e-12
ROBO2	1371.09	2.51271	0.348771	7.20448	5.82654e-13	4.9971e-12
SATB2	290.844	-2.276	0.316126	-7.19965	6.03669e-13	5.1723e-12
FLT4	255.444	-1.6432	0.228259	-7.19884	6.07265e-13	5.20057e-12
ADRA1B	21.3778	-2.62566	0.364883	-7.19588	6.20585e-13	5.31206e-12
TOM1L1	578.133	-1.74099	0.241975	-7.19494	6.24893e-13	5.34634e-12
LINC00475	16	4.15445	0.577894	7.18895	6.529e-13	5.58054e-12
ENO1	1820.16	-1.14506	0.159289	-7.18858	6.54687e-13	5.5931e-12
CTD-2540F13.2	16.0222	-2.64876	0.368633	-7.18537	6.70274e-13	5.72348e-12
SLC48A1	234.044	-1.2479	0.173694	-7.18446	6.74727e-13	5.75872e-12
CADPS2	798.911	-1.98163	0.275836	-7.18409	6.76556e-13	5.77153e-12
MTHFD2	182.956	1.63698	0.227876	7.18366	6.78718e-13	5.78717e-12
PAK3	118.156	2.08455	0.290198	7.18319	6.81054e-13	5.80428e-12
TEF	355.6	-1.33119	0.185329	-7.18284	6.82767e-13	5.81326e-12
MCM5	227.711	1.18861	0.16564	7.17588	7.18423e-13	6.11388e-12
LINC00864	7.22222	-4.4488	0.620014	-7.17533	7.21328e-13	6.13564e-12
TDRD9	86.9333	-2.47174	0.344531	-7.17422	7.27215e-13	6.18273e-12
BAIAP3	140.822	-2.41914	0.337267	-7.17277	7.34937e-13	6.24537e-12
PCYOX1	1054.51	-1.11453	0.155408	-7.17159	7.41342e-13	6.29676e-12
GOLT1A	11.7556	-2.99329	0.417394	-7.17137	7.42507e-13	6.30361e-12
DDHD1	512.267	1.12318	0.156626	7.17113	7.43817e-13	6.3117e-12
PTK7	908.6	1.26136	0.175951	7.16883	7.56419e-13	6.41554e-12
KCNE1	68.0444	-2.74709	0.383291	-7.1671	7.6601e-13	6.49376e-12
CXorf57	49.2444	-2.71806	0.379295	-7.16608	7.71757e-13	6.53933e-12
LAMTOR5	343.067	-1.2738	0.177797	-7.16437	7.8146e-13	6.61518e-12
ZFYVE28	97.6667	-1.81744	0.253712	-7.16338	7.87099e-13	6.65972e-12
PTPRQ	440	-4.01807	0.561059	-7.16157	7.97582e-13	6.74517e-12
ABCG8	13.1778	-3.97688	0.555335	-7.16123	7.99564e-13	6.75869e-12
TNFAIP1	58.1333	-1.11201	0.155291	-7.1608	8.02077e-13	6.77669e-12
RP11-367J11.3	9.17778	-2.30018	0.32134	-7.15811	8.17972e-13	6.90766e-12
MMP24	93.2444	-3.02311	0.422347	-7.15789	8.193e-13	6.91556e-12
SV2A	24.7556	2.11891	0.296118	7.15562	8.32965e-13	7.02418e-12
ERVMER34-1	67.7111	-2.23758	0.31286	-7.15199	8.55269e-13	7.20881e-12
LDLR	531.956	-1.90536	0.266427	-7.15152	8.58193e-13	7.23e-12
AC002539.1	11.7778	-3.00639	0.42043	-7.15074	8.63119e-13	7.26802e-12
IPCEF1	177.933	-1.44418	0.202023	-7.14858	8.768e-13	7.37618e-12
RRAD	56	-2.65261	0.371068	-7.14859	8.76759e-13	7.37618e-12
SCRN2	102.178	-1.22947	0.172119	-7.14313	9.12319e-13	7.66765e-12
CAMK2N1	482.622	-1.93361	0.270707	-7.1428	9.14457e-13	7.68196e-12
MFGE8	386.6	1.1564	0.161924	7.14166	9.22132e-13	7.74275e-12
ACKR2	73.1556	-1.89565	0.265439	-7.14158	9.2262e-13	7.74315e-12
GLI3	569.044	1.41506	0.19822	7.13886	9.41088e-13	7.89438e-12
SETD3	804.689	-1.04322	0.146142	-7.13839	9.44321e-13	7.91773e-12
RAB40B	129.044	-1.37801	0.193101	-7.13622	9.59326e-13	8.03972e-12
RP11-96C23.5	9.66667	-2.5432	0.356601	-7.13177	9.90863e-13	8.30006e-12
GPR180	260.622	1.14393	0.160421	7.13075	9.98249e-13	8.35797e-12
NHLRC4	19.0667	-2.17216	0.304682	-7.12926	1.0091e-12	8.44484e-12
RP13-580F15.2	8.24444	-2.98357	0.41856	-7.12818	1.01704e-12	8.50721e-12
SLC43A3	64.4	1.47601	0.207094	7.12728	1.02373e-12	8.55909e-12
BCAR1	404.311	-1.18176	0.165856	-7.12522	1.03915e-12	8.6839e-12
PLCZ1	14.8667	-4.45789	0.625705	-7.12458	1.04402e-12	8.72044e-12
BMP2K	774.022	1.17633	0.16518	7.12151	1.06752e-12	8.90832e-12
CNDP1	15.8444	-2.41918	0.339786	-7.11972	1.08149e-12	9.02057e-12
[truncated: 2,674 more rows]
