# Supplementary material for: Novel epigenetic signature, molecular subtypes and insights into IGF2/H19 dysregulation in Wilms tumour revealed by methylomic and transcriptomic profiling
Source: Research Square preprint supplement (doi:10.21203/rs.3.rs-8030860/v1), 2025-11-11
Supplement: Supplementary file 6 [file 75e514edfc3abed9f3e94ff5.xlsx]

## Sheet: Table S3_KEGG enrich DMSs
id	genome_fraction	observed_region_hits	fold_enrichment	p_value	p_adjust	mean_tss_dist	observed_gene_hits	gene_set_size	fold_enrichment_hyper	p_value_hyper	p_adjust_hyper
CELL_ADHESION_MOLECULES_CAMS	0.0198891	192	1.08187	0.144021	0.887203	331439	53	114	1.39353	0.00238746	0.0403699
ECM_RECEPTOR_INTERACTION	0.0105647	93	0.986541	0.566216	0.999997	160051	40	81	1.4802	0.0020204	0.0378815
LEUKOCYTE_TRANSENDOTHELIAL_MIGRATION	0.0128803	111	0.965801	0.656627	0.999997	133292	54	115	1.40748	0.00165899	0.0378815
WNT_SIGNALING_PATHWAY	0.020403	140	0.768994	0.999533	0.999997	146825	67	149	1.34783	0.00203664	0.0378815
MAPK_SIGNALING_PATHWAY	0.0299036	234	0.876963	0.982389	0.999997	207473	112	261	1.28625	0.000751113	0.0199582
CALCIUM_SIGNALING_PATHWAY	0.0201117	166	0.925015	0.854069	0.999997	221337	80	176	1.36246	0.000538852	0.0183064
FOCAL_ADHESION	0.0251852	194	0.863268	0.984201	0.999997	158230	88	197	1.33895	0.00059053	0.0183064
MELANOGENESIS	0.0136673	98	0.803586	0.989124	0.999997	154094	52	101	1.54322	0.000124846	0.00580534
ADHERENS_JUNCTION	0.0110832	111	1.1224	0.12141	0.825508	133686	41	72	1.70686	3.26774e-05	0.00405705
NEUROACTIVE_LIGAND_RECEPTOR_INTERACTION	0.0258343	260	1.12789	0.0282773	0.292199	171927	120	267	1.34715	4.89832e-05	0.00405705
PATHWAYS_IN_CANCER	0.0415583	325	0.876425	0.993801	0.999997	170851	141	323	1.30847	6.54363e-05	0.00405705
