# Supplementary material for: Novel epigenetic signature, molecular subtypes and insights into IGF2/H19 dysregulation in Wilms tumour revealed by methylomic and transcriptomic profiling
Source: Research Square preprint supplement (doi:10.21203/rs.3.rs-8030860/v1), 2025-11-11
Supplement: Supplementary file 7 [file 8a5471141c02d835a2910cdb.xlsx]

## Sheet: Table S2_DMSs
chr	start	end	strand	CpGID	gene	feature	cgi	meanDiff
chr1	9884732	9884732	R	cg00123104	CLSTN1	TSS200	shore	0.34668
chr1	16330716	16330716	R	cg08887581	C1orf64	TSS200	opensea	0.303066
chr1	32041898	32041898	R	cg15120085	TINAGL1	TSS200	opensea	0.389231
chr1	32041940	32041940	F	cg15079885	TINAGL1	TSS200	opensea	0.336689
chr1	32042037	32042037	R	cg22855405	TINAGL1	TSS200	opensea	0.339579
chr1	32042050	32042050	R	cg16638238	TINAGL1	TSS200	opensea	0.377816
chr1	32043619	32043619	R	cg26394270	TINAGL1	TSS200	opensea	0.362654
chr1	35525367	35525367	R	cg24594818	ZMYM1	TSS200	opensea	-0.35692
chr1	35525383	35525383	R	cg07284483	ZMYM1	TSS200	opensea	-0.428789
chr1	42619087	42619087	R	cg14258285	GUCA2B	TSS200	opensea	0.316134
chr1	51763651	51763651	F	cg17506790	TTC39A	TSS200	opensea	0.328885
chr1	62660356	62660356	R	cg05000407	L1TD1	TSS200	shore	0.41115
chr1	62660421	62660421	R	cg14254748	L1TD1	TSS200	shore	0.356831
chr1	62660435	62660435	R	cg01391898	L1TD1	TSS200	shore	0.50622
chr1	78511466	78511466	R	cg01074657	GIPC2	TSS200	shore	0.323387
chr1	110254828	110254828	R	cg25210835	GSTM5	TSS200	opensea	0.412288
chr1	110254835	110254835	R	cg24467349	GSTM5	TSS200	opensea	0.406583
chr1	117021500	117021500	F	cg15506091	LOC101929023	TSS200	opensea	0.324823
chr1	119911452	119911452	R	cg02111421	HAO2-IT1	TSS200	opensea	0.311785
chr1	151966892	151966892	F	cg13249591	S100A10	TSS200	island	0.324134
chr1	152956429	152956429	R	cg04546999	SPRR1A	TSS200	opensea	-0.340176
chr1	153363580	153363580	F	cg24898863	S100A8	TSS200	opensea	-0.307379
chr1	156030844	156030844	F	cg09243900	RAB25	TSS200	opensea	0.370975
chr1	157811650	157811650	R	cg03377310	CD5L	TSS200	opensea	-0.367985
chr1	157811724	157811724	F	cg03761113	CD5L	TSS200	opensea	-0.344481
chr1	158369334	158369334	R	cg24982343	OR10T2	TSS200	opensea	-0.341034
chr1	158801084	158801084	R	cg16279948	MNDA	TSS200	opensea	-0.442426
chr1	158979538	158979538	R	cg01342196	IFI16	TSS200	opensea	-0.341862
chr1	160549261	160549261	R	cg13978689	CD84	TSS200	opensea	-0.413356
chr1	160549316	160549316	F	cg12177979	CD84	TSS200	opensea	-0.399559
chr1	160617092	160617092	F	cg01710351	SLAMF1	TSS200	opensea	-0.352702
chr1	160617124	160617124	R	cg00149213	SLAMF1	TSS200	opensea	-0.374645
chr1	160681760	160681760	F	cg05200628	CD48	TSS200	opensea	-0.404904
chr1	161147821	161147821	F	cg05990652	B4GALT3	TSS200	shore	0.336869
chr1	173174860	173174860	R	cg10155780	TNFSF4	TSS200	opensea	-0.304094
chr1	173176465	173176465	F	cg23038529	TNFSF4	TSS200	opensea	-0.312285
chr1	173176501	173176501	F	cg26315984	TNFSF4	TSS200	opensea	-0.328053
chr1	173572273	173572273	R	cg17695891	SLC9C2	TSS200	opensea	-0.318056
chr1	179560870	179560870	F	cg12277666	TDRD5	TSS200	island	0.31004
chr1	190594016	190594016	R	cg12412036	LOC440704	TSS200	opensea	-0.327326
chr1	196620870	196620870	F	cg07780180	CFH	TSS200	opensea	-0.353936
chr1	203155938	203155938	R	cg14085262	CHI3L1	TSS200	opensea	-0.346697
chr1	205326059	205326059	F	cg21996351	KLHDC8A	TSS200	opensea	-0.381212
chr1	205326071	205326071	F	cg08159989	KLHDC8A	TSS200	opensea	-0.40167
chr1	205326399	205326399	F	cg22889645	KLHDC8A	TSS200	opensea	-0.343934
chr1	217311172	217311172	F	cg21784383	ESRRG	TSS200	island	0.394584
chr1	217311177	217311177	F	cg25975621	ESRRG	TSS200	island	0.389647
chr1	217311209	217311209	F	cg14878917	ESRRG	TSS200	shore	0.386485
chr1	217311234	217311234	R	cg25452854	ESRRG	TSS200	shore	0.31225
chr1	228362233	228362233	R	cg02017417	IBA57	TSS200	shore	0.419027
chr1	247579312	247579312	F	cg21919599	NLRP3	TSS200	opensea	-0.396528
chr1	247579319	247579319	F	cg09418290	NLRP3	TSS200	opensea	-0.431881
chr10	4868364	4868364	F	cg13218425	AKR1E2	TSS200	island	0.338545
chr10	4868386	4868386	R	cg00700969	AKR1E2	TSS200	island	0.312469
chr10	4868398	4868398	R	cg12255897	AKR1E2	TSS200	island	0.352944
chr10	27541418	27541418	F	cg15469871	LOC387646	TSS200	island	0.330179
chr10	29923920	29923920	F	cg04678141	SVIL	TSS200	opensea	-0.318026
chr10	29923942	29923942	R	cg21637909	SVIL	TSS200	opensea	-0.305764
chr10	81967272	81967272	R	cg08880670	LINC00857	TSS200	island	0.342067
chr10	81967281	81967281	R	cg25660691	LINC00857	TSS200	island	0.416505
chr10	81967284	81967284	R	cg25677116	LINC00857	TSS200	island	0.322851
chr10	88728078	88728078	F	cg01754756	C10orf116	TSS200	island	0.476369
chr10	88728128	88728128	R	cg09573585	C10orf116	TSS200	island	0.420494
chr10	94820892	94820892	R	cg01416891	CYP26C1	TSS200	island	0.403063
chr10	94820923	94820923	R	cg05219493	CYP26C1	TSS200	island	0.386377
chr10	94820988	94820988	F	cg25083618	CYP26C1	TSS200	island	0.342881
chr10	104613787	104613787	F	cg16330755	C10orf32	TSS200	shore	0.321885
chr10	118350475	118350475	F	cg07238926	PNLIPRP1	TSS200	opensea	-0.333378
chr10	124670078	124670078	F	cg18822598	FAM24A	TSS200	opensea	-0.323581
chr10	129535348	129535348	F	cg08829841	FOXI2	TSS200	island	0.458751
chr10	129535378	129535378	F	cg16642284	FOXI2	TSS200	island	0.411332
chr10	129535509	129535509	R	cg09614415	FOXI2	TSS200	island	0.371508
chr10	135171718	135171718	R	cg21345949	C10orf125	TSS200	island	0.321457
chr11	5265008	5265008	F	cg05133853	HBBP1	TSS200	opensea	-0.309082
chr11	6518438	6518438	R	cg14370752	DNHD1	TSS200	opensea	0.340832
chr11	7618401	7618401	F	cg18962562	PPFIBP2	TSS200	opensea	0.322059
chr11	7950225	7950225	R	cg00444390	OR10A6	TSS200	opensea	-0.342612
chr11	18230625	18230625	R	cg09511963	LOC494141	TSS200	island	0.3059
chr11	18230629	18230629	R	cg12302402	LOC494141	TSS200	island	0.366687
chr11	18433683	18433683	R	cg11821245	LDHC	TSS200	opensea	0.358138
chr11	18433732	18433732	R	cg14259717	LDHC	TSS200	opensea	0.360035
chr11	18433745	18433745	R	cg08418111	LDHC	TSS200	opensea	0.354705
chr11	18433748	18433748	R	cg21471707	LDHC	TSS200	opensea	0.322094
chr11	46383051	46383051	F	cg07920092	DGKZ	TSS200	opensea	-0.389011
chr11	46740703	46740703	F	cg05450701	F2	TSS200	opensea	0.307153
chr11	55110527	55110527	F	cg17782067	OR4A16	TSS200	opensea	-0.298594
chr11	55110562	55110562	F	cg19539556	OR4A16	TSS200	opensea	-0.323019
chr11	55587090	55587090	F	cg01923766	OR5D18	TSS200	opensea	-0.349102
chr11	55682099	55682099	R	cg26349048	OR5W2	TSS200	opensea	-0.316626
chr11	55905246	55905246	F	cg11323650	OR8J3	TSS200	opensea	-0.411391
chr11	56000767	56000767	F	cg01143197	OR5T2	TSS200	opensea	-0.392291
chr11	56043040	56043040	R	cg01464104	OR5T1	TSS200	opensea	-0.412487
chr11	56127508	56127508	R	cg12517523	OR8J1	TSS200	opensea	-0.373225
chr11	56258947	56258947	R	cg14301370	OR5M8	TSS200	opensea	-0.392829
chr11	58207761	58207761	R	cg09923978	OR5B12	TSS200	opensea	-0.328942
chr11	59210634	59210634	F	cg10919344	OR5A1	TSS200	opensea	-0.35484
chr11	59634191	59634191	F	cg23741006	TCN1	TSS200	opensea	-0.384474
chr11	63273507	63273507	R	cg13439241	LGALS12	TSS200	opensea	-0.412514
chr11	64739636	64739636	F	cg10149600	C11orf85	TSS200	island	0.311514
chr11	64739749	64739749	F	cg24077102	C11orf85	TSS200	island	0.301499
chr11	67806347	67806347	F	cg08162803	TCIRG1	TSS200	island	0.472748
chr11	67806363	67806363	F	cg11731626	TCIRG1	TSS200	island	0.450406
chr11	67806426	67806426	R	cg11671925	TCIRG1	TSS200	island	0.317609
chr11	67806432	67806432	R	cg26002713	TCIRG1	TSS200	island	0.412577
chr11	67806437	67806437	R	cg17589079	TCIRG1	TSS200	island	0.31528
chr11	73357159	73357159	R	cg02254407	PLEKHB1	TSS200	opensea	0.351846
chr11	73357164	73357164	R	cg24176731	PLEKHB1	TSS200	opensea	0.343381
chr11	104916095	104916095	F	cg01943200	CARD16	TSS200	opensea	-0.321767
chr12	7818654	7818654	F	cg17187764	APOBEC1	TSS200	opensea	-0.319815
chr12	8025593	8025593	R	cg11207307	SLC2A14	TSS200	island	0.358412
chr12	16430706	16430706	F	cg16844635	SLC15A5	TSS200	opensea	-0.31652
chr12	16430768	16430768	R	cg04968650	SLC15A5	TSS200	opensea	-0.303722
chr12	25055441	25055441	R	cg14717988	BCAT1	TSS200	shore	0.319991
chr12	51236693	51236693	F	cg15169829	TMPRSS12	TSS200	island	0.344166
chr12	52685334	52685334	R	cg15701111	KRT81	TSS200	shore	0.373865
chr12	52995358	52995358	R	cg22200736	KRT72	TSS200	shore	0.31777
chr12	55845955	55845955	R	cg21462785	OR6C2	TSS200	opensea	-0.346807
chr12	55968117	55968117	R	cg26381357	OR2AP1	TSS200	opensea	-0.335757
chr12	66220810	66220810	F	cg09972016	RPSAP52	TSS200	shore	-0.325997
chr12	67072951	67072951	F	cg10802444	GRIP1	TSS200	opensea	-0.344223
chr12	67073022	67073022	F	cg09414535	GRIP1	TSS200	opensea	-0.354049
chr12	67073062	67073062	R	cg10865238	GRIP1	TSS200	opensea	-0.366965
chr12	82347431	82347431	F	cg24194660	LOC101928449	TSS200	opensea	-0.467719
chr12	93096780	93096780	R	cg12755471	C12orf74	TSS200	opensea	0.36957
chr12	93096811	93096811	R	cg27576271	C12orf74	TSS200	opensea	0.320033
chr12	93096819	93096819	R	cg26383838	C12orf74	TSS200	opensea	0.332095
chr12	95945384	95945384	R	cg14565151	USP44	TSS200	shelf	0.343075
chr12	100897076	100897076	R	cg05108417	NR1H4	TSS200	opensea	0.34734
chr14	39702965	39702965	R	cg23292259	MIA2	TSS200	opensea	0.325366
chr14	55907385	55907385	R	cg26143452	TBPL2	TSS200	island	0.324302
chr14	57960754	57960754	F	cg21493873	C14orf105	TSS200	opensea	0.320195
chr14	95027692	95027692	R	cg05186455	SERPINA4	TSS200	opensea	0.328915
chr14	96180576	96180576	R	cg19992633	TCL1A	TSS200	island	0.387851
chr14	96180598	96180598	R	cg27089768	TCL1A	TSS200	island	0.425004
chr14	96180643	96180643	R	cg24996565	TCL1A	TSS200	island	0.324799
chr15	25481210	25481210	R	cg06298530	SNORD115-11	TSS200	opensea	-0.310361
chr15	40674878	40674878	F	cg02633229	C15orf23	TSS200	shore	0.327717
chr15	68111947	68111947	R	cg13969843	SKOR1	TSS200	shore	0.320275
chr15	68112019	68112019	R	cg01512447	SKOR1	TSS200	shore	0.378663
chr15	68112028	68112028	F	cg20333059	SKOR1	TSS200	shore	0.442664
chr15	90319516	90319516	F	cg12206103	MESP2	TSS200	shore	0.318308
chr15	99057614	99057614	F	cg15618989	FAM169B	TSS200	opensea	0.364924
chr15	101084980	101084980	F	cg06679270	LASS3	TSS200	island	0.342447
chr16	2848409	2848409	R	cg25618731	TESSP1	TSS200	shore	0.325267
chr16	21244898	21244898	F	cg08030625	ANKS4B	TSS200	opensea	0.322943
chr16	56651367	56651367	F	cg06846010	MT1L	TSS200	island	0.35857
chr16	59789219	59789219	F	cg13027458	LOC644649	TSS200	shore	-0.427363
chr16	66952893	66952893	F	cg03562220	CDH16	TSS200	shelf	0.323102
chr16	67232921	67232921	R	cg26178184	ELMO3	TSS200	shore	0.437714
chr16	67233002	67233002	R	cg16113721	ELMO3	TSS200	shore	0.307788
chr16	69385726	69385726	R	cg23373396	TMED6	TSS200	opensea	0.342245
chr16	69385761	69385761	R	cg08627125	TMED6	TSS200	opensea	0.331339
chr16	69385827	69385827	R	cg18368125	TMED6	TSS200	opensea	0.403647
chr16	82068702	82068702	R	cg26479028	HSD17B2	TSS200	opensea	0.389513
chr16	89225592	89225592	F	cg05676251	C16orf81	TSS200	shore	-0.350437
chr16	89225602	89225602	F	cg05498586	C16orf81	TSS200	shore	-0.304598
chr17	1553415	1553415	R	cg05548425	RILP	TSS200	shore	0.344283
chr17	1553585	1553585	F	cg03044281	RILP	TSS200	shore	0.331638
chr17	6899207	6899207	F	cg14375499	ALOX12	TSS200	island	0.342901
chr17	6899297	6899297	R	cg03760483	ALOX12	TSS200	island	0.314252
chr17	6899310	6899310	R	cg03404566	ALOX12	TSS200	island	0.309348
chr17	18855313	18855313	F	cg00306284	SLC5A10	TSS200	opensea	0.331821
chr17	29886890	29886890	R	cg22894896	MIR193A	TSS200	island	0.519048
chr17	36105117	36105117	R	cg05222347	HNF1B	TSS200	shore	0.438488
chr17	36105210	36105210	F	cg10772489	HNF1B	TSS200	shore	0.524959
chr17	36105239	36105239	R	cg02335804	HNF1B	TSS200	shore	0.57489
chr17	38024353	38024353	R	cg07607752	ZPBP2	TSS200	island	0.30881
chr17	40274703	40274703	R	cg16208084	HSPB9	TSS200	island	0.495235
chr17	40274722	40274722	R	cg26934993	HSPB9	TSS200	island	0.415968
chr17	40274728	40274728	R	cg08880849	HSPB9	TSS200	island	0.579678
chr17	40274740	40274740	R	cg07168142	HSPB9	TSS200	island	0.494393
chr17	41052658	41052658	R	cg05353659	G6PC	TSS200	opensea	0.318503
chr17	46682410	46682410	F	cg04588674	HOXB6	TSS200	shelf	0.398543
chr17	72588412	72588412	R	cg26886976	CD300LD	TSS200	opensea	-0.352687
chr17	72619962	72619962	F	cg13018120	CD300E	TSS200	opensea	-0.310535
chr17	75446450	75446450	F	cg14885762	SEPT9	TSS200	shore	-0.312773
chr17	75446565	75446565	F	cg21204860	SEPT9	TSS200	shore	-0.325812
chr17	75446592	75446592	F	cg19654743	SEPT9	TSS200	shore	-0.348003
chr17	75471214	75471214	R	cg11947295	SEPT9	TSS200	opensea	-0.311207
chr18	29171662	29171662	F	cg22872729	TTR	TSS200	opensea	0.468838
chr18	29171671	29171671	R	cg05960982	TTR	TSS200	opensea	0.360318
chr18	40695711	40695711	R	cg06012795	RIT2	TSS200	opensea	-0.312037
chr18	45663766	45663766	R	cg19189151	ZBTB7C	TSS200	shore	-0.302842
chr18	55714359	55714359	F	cg11049680	NEDD4L	TSS200	shore	0.394089
chr18	55714371	55714371	F	cg22624429	NEDD4L	TSS200	shore	0.305242
chr18	55714393	55714393	F	cg21615397	NEDD4L	TSS200	shore	0.366539
chr18	61616526	61616526	F	cg23782616	HMSD	TSS200	opensea	0.334015
chr19	695549	695549	R	cg13463459	PRSSL1	TSS200	opensea	-0.335244
chr19	695564	695564	F	cg16429839	PRSS57	TSS200	opensea	-0.346576
chr19	695568	695568	F	cg06599390	PRSSL1	TSS200	opensea	-0.357977
chr19	7741809	7741809	R	cg03470073	C19orf59	TSS200	shelf	-0.321777
chr19	7741838	7741838	R	cg17661462	C19orf59	TSS200	shelf	-0.392534
chr19	11784647	11784647	R	cg05950877	ZNF833	TSS200	shore	0.542769
chr19	11784708	11784708	R	cg25394203	ZNF833	TSS200	shore	0.443783
chr19	11784731	11784731	R	cg26590664	ZNF833	TSS200	shore	0.513664
chr19	11784761	11784761	R	cg21771200	ZNF833	TSS200	shore	0.447614
chr19	11784774	11784774	R	cg15209566	ZNF833	TSS200	shore	0.39229
chr19	12624742	12624742	F	cg19926444	ZNF709	TSS200	shore	0.34977
chr19	12624770	12624770	F	cg23989004	ZNF709	TSS200	shore	0.313878
chr19	12863295	12863295	F	cg16554020	BEST2	TSS200	shelf	-0.341895
chr19	12863331	12863331	R	cg25146369	BEST2	TSS200	shelf	-0.351443
chr19	14196637	14196637	F	cg09379609	C19orf67	TSS200	island	0.474348
chr19	14196728	14196728	R	cg15245122	C19orf67	TSS200	shore	0.302067
chr19	14196753	14196753	R	cg09796101	C19orf67	TSS200	shore	0.347533
chr19	14196769	14196769	R	cg25937382	C19orf67	TSS200	shore	0.331136
chr19	15052282	15052282	F	cg18385570	OR7C2	TSS200	opensea	-0.308757
chr19	15052294	15052294	R	cg09849955	OR7C2	TSS200	opensea	-0.336914
chr19	15344046	15344046	R	cg26010734	EPHX3	TSS200	shore	0.481094
chr19	43969884	43969884	F	cg04259907	LYPD3	TSS200	shore	0.304394
chr19	52005153	52005153	F	cg04336859	SIGLEC12	TSS200	opensea	-0.380851
chr19	52005176	52005176	F	cg13981787	SIGLEC12	TSS200	opensea	-0.339833
chr19	52005188	52005188	F	cg02381385	SIGLEC12	TSS200	opensea	-0.310788
chr19	54850475	54850475	F	cg25040293	LILRA4	TSS200	opensea	-0.313513
chr19	54876728	54876728	F	cg21878746	LAIR1	TSS200	opensea	-0.325439
chr19	54876749	54876749	F	cg01515802	LAIR1	TSS200	opensea	-0.33848
chr19	54876752	54876752	F	cg10132694	LAIR1	TSS200	opensea	-0.29977
chr19	54876795	54876795	F	cg20117742	LAIR1	TSS200	opensea	-0.307958
chr19	55013946	55013946	R	cg25588792	LAIR2	TSS200	opensea	-0.345009
chr19	55013954	55013954	R	cg19547155	LAIR2	TSS200	opensea	-0.313871
chr19	55043845	55043845	F	cg04244985	KIR3DX1	TSS200	opensea	-0.335747
chr19	58220657	58220657	F	cg03234186	ZNF154	TSS200	shore	0.490313
chr19	58220662	58220662	F	cg08668790	ZNF154	TSS200	shore	0.483759
chr19	58220669	58220669	R	cg00983956	ZNF154	TSS200	shore	0.481203
chr19	58220718	58220718	F	cg12506930	ZNF154	TSS200	shore	0.505058
chr19	58220773	58220773	F	cg26465391	ZNF154	TSS200	shore	0.480616
chr19	58280832	58280832	R	cg03584535	ZNF586	TSS200	shore	0.368657
chr19	58280891	58280891	F	cg07685728	ZNF586	TSS200	shore	0.375668
chr19	58341657	58341657	F	cg12660146	ZNF587B	TSS200	opensea	0.342114
chr2	2335088	2335088	F	cg14615195	MYT1L	TSS200	opensea	-0.348325
chr2	2335090	2335090	F	cg20435238	MYT1L	TSS200	opensea	-0.343282
chr2	6072801	6072801	R	cg25686172	LOC150622	TSS200	opensea	-0.311127
chr2	24397871	24397871	R	cg21778743	FAM228A	TSS200	island	0.423095
chr2	25142198	25142198	F	cg21011133	ADCY3	TSS200	shore	-0.347804
chr2	25142229	25142229	F	cg21151432	ADCY3	TSS200	shore	-0.395792
chr2	65593933	65593933	R	cg08467103	SPRED2	TSS200	opensea	-0.313609
chr2	65594021	65594021	R	cg26376241	SPRED2	TSS200	opensea	-0.300816
chr2	74875253	74875253	F	cg02109484	C2orf65	TSS200	island	0.40725
chr2	74875263	74875263	F	cg17019053	C2orf65	TSS200	island	0.410944
chr2	74875268	74875268	F	cg00273449	C2orf65	TSS200	island	0.367807
chr2	79727973	79727973	R	cg10704270	LOC101927987	TSS200	opensea	-0.328136
chr2	96781891	96781891	R	cg21542793	ADRA2B	TSS200	island	0.361074
chr2	106681937	106681937	F	cg14535980	C2orf40	TSS200	shore	0.390659
chr2	106681945	106681945	F	cg21838979	C2orf40	TSS200	shore	0.45737
chr2	106681983	106681983	R	cg06499647	C2orf40	TSS200	island	0.317618
chr2	106681998	106681998	R	cg07510423	C2orf40	TSS200	island	0.410057
chr2	106682003	106682003	R	cg27342273	C2orf40	TSS200	island	0.403642
chr2	106755481	106755481	F	cg08714510	UXS1	TSS200	opensea	0.399781
chr2	106755487	106755487	F	cg06888756	UXS1	TSS200	opensea	0.489887
chr2	113594375	113594375	R	cg07935264	IL1B	TSS200	opensea	-0.427603
chr2	138721672	138721672	R	cg12092718	HNMT	TSS200	opensea	0.308691
chr2	160761262	160761262	F	cg18514922	LY75	TSS200	island	0.395059
chr2	160761400	160761400	R	cg10699296	LY75	TSS200	island	0.440464
chr2	160761413	160761413	R	cg14819504	LY75	TSS200	island	0.44121
chr2	160761427	160761427	R	cg01092293	LY75	TSS200	island	0.399077
chr2	160761429	160761429	R	cg13557231	LY75	TSS200	island	0.474732
chr2	163009036	163009036	F	cg22471459	GCG	TSS200	opensea	-0.380201
chr2	163009102	163009102	F	cg17202985	GCG	TSS200	opensea	-0.332214
chr2	166790225	166790225	R	cg11162602	TTC21B-AS1	TSS200	opensea	0.359908
chr2	167005840	167005840	F	cg09800774	SCN1A	TSS200	opensea	-0.299745
chr2	167744953	167744953	F	cg06439907	XIRP2	TSS200	opensea	-0.372075
chr2	176964404	176964404	F	cg18022224	HOXD12	TSS200	island	0.382958
chr2	176964456	176964456	R	cg03874199	HOXD12	TSS200	island	0.353296
chr2	176964512	176964512	R	cg02694427	HOXD12	TSS200	island	0.356561
chr2	178753535	178753535	F	cg05847901	PDE11A	TSS200	opensea	-0.308207
chr2	186603311	186603311	R	cg25343589	FSIP2	TSS200	shore	0.335544
chr2	186603317	186603317	R	cg23506322	FSIP2	TSS200	shore	0.325263
chr2	234601443	234601443	F	cg23510527	UGT1A6	TSS200	opensea	0.355313
chr20	1472264	1472264	R	cg24311135	SIRPB2	TSS200	opensea	-0.319849
chr20	1600705	1600705	F	cg09577651	SIRPB1	TSS200	opensea	-0.301056
chr20	23015906	23015906	R	cg17586860	SSTR4	TSS200	island	0.365552
chr20	23015908	23015908	R	cg18197392	SSTR4	TSS200	island	0.315124
chr20	23015932	23015932	R	cg07676859	SSTR4	TSS200	island	0.342842
chr20	23015936	23015936	R	cg22534145	SSTR4	TSS200	island	0.322423
chr20	29896479	29896479	R	cg11484348	DEFB116	TSS200	opensea	-0.362308
chr20	30639877	30639877	R	cg02179592	HCK	TSS200	shore	0.441624
chr20	31781232	31781232	R	cg11274778	BASE	TSS200	opensea	-0.387341
chr20	32308259	32308259	F	cg15991950	PXMP4	TSS200	shore	0.324436
chr20	35972957	35972957	F	cg18858144	SRC	TSS200	shore	0.343526
chr20	35973042	35973042	F	cg24055525	SRC	TSS200	shore	0.329315
chr20	43029695	43029695	R	cg23746144	HNF4A	TSS200	opensea	0.389945
chr20	43029732	43029732	R	cg07006673	HNF4A	TSS200	opensea	0.334219
chr20	43029777	43029777	F	cg27420224	HNF4A	TSS200	opensea	0.37431
chr20	50419082	50419082	F	cg19871388	SALL4	TSS200	shore	0.302891
chr21	22175522	22175522	R	cg26977737	C21orf131	TSS200	opensea	-0.398128
chr21	35896993	35896993	R	cg17697004	RCAN1	TSS200	opensea	0.351807
chr21	36041579	36041579	F	cg18371700	CLIC6	TSS200	island	0.450304
chr21	36041605	36041605	F	cg19200589	CLIC6	TSS200	island	0.535175
chr21	36041612	36041612	F	cg18074297	CLIC6	TSS200	island	0.496455
chr21	36041683	36041683	R	cg11528328	CLIC6	TSS200	island	0.547939
chr21	37092865	37092865	F	cg18862975	MIR802	TSS200	opensea	-0.347475
chr21	42733894	42733894	R	cg15281283	MX2	TSS200	opensea	-0.307527
chr21	46845160	46845160	R	cg07529658	NCRNA00175	TSS200	shelf	0.364451
chr22	17680545	17680545	R	cg13248581	CECR1	TSS200	opensea	0.44207
chr22	17680561	17680561	R	cg17333767	CECR1	TSS200	opensea	0.452974
chr22	17680563	17680563	R	cg21830459	CECR1	TSS200	opensea	0.412601
chr22	17680575	17680575	R	cg21144941	CECR1	TSS200	opensea	0.408427
chr22	17680578	17680578	R	cg22910462	CECR1	TSS200	opensea	0.422265
chr22	17680704	17680704	R	cg12317346	CECR1	TSS200	opensea	0.336845
chr22	17680706	17680706	R	cg01972843	CECR1	TSS200	opensea	0.321842
chr22	22901830	22901830	F	cg22871485	PRAME	TSS200	shore	-0.319265
chr22	24241124	24241124	R	cg19776580	MIF-AS1	TSS200	shelf	0.319896
chr22	30476254	30476254	R	cg15209808	HORMAD2	TSS200	island	0.405193
chr22	30476278	30476278	R	cg10195901	HORMAD2	TSS200	island	0.394275
chr22	30476281	30476281	F	cg14509403	HORMAD2	TSS200	island	0.339478
chr22	30476326	30476326	F	cg17632937	HORMAD2	TSS200	island	0.399842
chr22	30476345	30476345	F	cg23268208	HORMAD2	TSS200	island	0.389712
chr22	42095347	42095347	R	cg20522370	MEI1	TSS200	shore	0.355857
chr22	42095368	42095368	F	cg10296410	MEI1	TSS200	shore	0.446418
chr22	42095430	42095430	R	cg10384919	MEI1	TSS200	island	0.399173
chr22	42095441	42095441	R	cg22476848	MEI1	TSS200	island	0.357253
chr22	42095443	42095443	F	cg22804236	MEI1	TSS200	island	0.374839
chr22	50528291	50528291	F	cg03860256	MOV10L1	TSS200	island	0.323056
chr22	50528333	50528333	F	cg10828284	MOV10L1	TSS200	island	0.383478
chr3	4948256	4948256	F	cg08061844	BHLHE40-AS1	TSS200	opensea	0.328688
chr3	10150083	10150083	F	cg15117754	C3orf24	TSS200	shore	0.312595
chr3	11178683	11178683	F	cg06457736	HRH1	TSS200	opensea	-0.311216
chr3	40428508	40428508	R	cg17200465	ENTPD3	TSS200	shore	0.320383
chr3	49941408	49941408	F	cg18129748	MST1R	TSS200	island	0.354221
chr3	49941416	49941416	F	cg11663600	MST1R	TSS200	island	0.346899
chr3	49941470	49941470	R	cg06521550	MST1R	TSS200	shore	0.324816
chr3	50341009	50341009	F	cg14943722	HYAL1	TSS200	opensea	0.447268
chr3	50341062	50341062	R	cg02046192	HYAL1	TSS200	opensea	0.355505
chr3	50341183	50341183	R	cg06360465	HYAL1	TSS200	opensea	0.343175
chr3	52260227	52260227	F	cg08721301	TLR9	TSS200	opensea	-0.304533
chr3	72200262	72200262	F	cg06226369	LINC00870	TSS200	opensea	0.329145
chr3	72200396	72200396	R	cg04601779	LINC00870	TSS200	opensea	0.380228
chr3	95402155	95402155	R	cg21254120	MTHFD2P1	TSS200	opensea	-0.423161
chr3	98250613	98250613	R	cg22032803	GPR15	TSS200	opensea	-0.311244
chr3	101659687	101659687	F	cg12963656	LOC152225	TSS200	opensea	-0.325229
chr3	108541522	108541522	R	cg12517060	TRAT1	TSS200	opensea	-0.306656
chr3	111451273	111451273	R	cg21857668	PHLDB2	TSS200	opensea	0.408712
chr3	122043865	122043865	F	cg18618429	CSTA	TSS200	opensea	-0.330539
chr3	131080516	131080516	F	cg00404641	NUDT16P	TSS200	shore	0.338388
chr3	131080697	131080697	F	cg18413131	NUDT16P	TSS200	island	0.310276
chr3	139396918	139396918	F	cg25537988	NMNAT3	TSS200	shore	0.329294
chr3	139396924	139396924	F	cg09721739	NMNAT3	TSS200	shore	0.380767
chr3	139396928	139396928	F	cg23571537	NMNAT3	TSS200	shore	0.352538
chr3	143567492	143567492	R	cg15360181	SLC9A9	TSS200	opensea	-0.344883
chr3	149192304	149192304	F	cg13235059	TM4SF4	TSS200	opensea	0.341379
chr3	153202275	153202275	R	cg00731062	C3orf79	TSS200	opensea	-0.405444
chr3	157154506	157154506	R	cg19073688	PTX3	TSS200	shore	-0.307306
chr3	186383551	186383551	F	cg21315983	HRG	TSS200	opensea	0.408628
chr3	186383752	186383752	R	cg10230442	HRG	TSS200	opensea	0.341276
chr3	194030679	194030679	F	cg18677603	LOC100131551	TSS200	shelf	-0.333418
chr3	194030706	194030706	R	cg07141504	LOC100131551	TSS200	shelf	-0.364079
chr3	195869344	195869344	F	cg26673516	LINC00885	TSS200	opensea	0.310954
chr4	683148	683148	F	cg02096793	MFSD7	TSS200	shore	0.393817
chr4	1202653	1202653	F	cg14527262	LOC100130872-SPON2	TSS200	shore	-0.388688
chr4	1202657	1202657	F	cg04228083	LOC100130872-SPON2	TSS200	shore	-0.344986
chr4	1202861	1202861	F	cg11104416	LOC100130872	TSS200	shore	-0.311513
chr4	3371715	3371715	R	cg00968423	RGS12	TSS200	shelf	-0.355979
chr4	14889868	14889868	F	cg21832068	LINC00504	TSS200	opensea	-0.383391
chr4	21305549	21305549	R	cg05005308	KCNIP4	TSS200	opensea	-0.390523
chr4	40518046	40518046	R	cg00736641	RBM47	TSS200	opensea	0.340085
chr4	57975738	57975738	F	cg23093377	IGFBP7-AS1	TSS200	shore	0.385289
chr4	80994647	80994647	R	cg12667673	ANTXR2	TSS200	shore	-0.300367
chr4	100140474	100140474	F	cg10099209	ADH6	TSS200	opensea	0.351116
chr4	185727098	185727098	F	cg16460004	ACSL1	TSS200	shelf	0.318702
chr4	187070225	187070225	F	cg10802875	FAM149A	TSS200	shelf	0.319732
chr4	188916724	188916724	R	cg14817655	ZFP42	TSS200	island	0.444764
chr4	188916726	188916726	R	cg24896649	ZFP42	TSS200	island	0.371738
chr4	188916865	188916865	R	cg18034737	ZFP42	TSS200	island	0.481834
chr4	188916867	188916867	R	cg06274159	ZFP42	TSS200	island	0.484717
chr4	188916875	188916875	R	cg10242602	ZFP42	TSS200	island	0.458661
chr5	34043481	34043481	F	cg23051392	C1QTNF3	TSS200	opensea	-0.305725
chr5	54281507	54281507	F	cg13106512	ESM1	TSS200	opensea	-0.315531
chr5	54398290	54398290	F	cg06058187	GZMA	TSS200	opensea	-0.31185
chr5	72416202	72416202	F	cg27085869	TMEM171	TSS200	island	0.368599
chr5	78365677	78365677	F	cg12648510	DMGDH	TSS200	island	0.375368
chr5	90610277	90610277	R	cg03184235	LUCAT1	TSS200	opensea	-0.399185
chr5	131409352	131409352	F	cg26369418	CSF2	TSS200	opensea	-0.299005
chr5	132209201	132209201	R	cg11397957	LEAP2	TSS200	opensea	0.416033
chr5	132209235	132209235	R	cg16834894	LEAP2	TSS200	opensea	0.319971
chr5	140220731	140220731	R	cg24339092	PCDHA8	TSS200	shore	0.385115
chr5	140220895	140220895	F	cg15320168	PCDHA8	TSS200	shore	0.359087
chr5	140254845	140254845	R	cg09852127	PCDHA12	TSS200	shore	0.50068
chr5	140254909	140254909	F	cg14557699	PCDHA12	TSS200	shore	0.462974
chr5	140479823	140479823	R	cg17609028	PCDHB3	TSS200	shore	0.332642
chr5	140480200	140480200	R	cg24586758	PCDHB3	TSS200	shore	0.34978
chr5	140501311	140501311	R	cg15066174	PCDHB4	TSS200	shore	0.427548
chr5	140501380	140501380	R	cg13288164	PCDHB4	TSS200	shore	0.422339
chr5	140501403	140501403	R	cg07129523	PCDHB4	TSS200	shore	0.324461
chr5	140501451	140501451	R	cg17288142	PCDHB4	TSS200	shore	0.3635
chr5	140566682	140566682	F	cg20082988	PCDHB9	TSS200	shore	0.334816
chr5	140588221	140588221	F	cg17047981	PCDHB12	TSS200	shore	0.309798
chr5	140588223	140588223	F	cg05827573	PCDHB12	TSS200	shore	0.390797
chr5	140588231	140588231	F	cg12343638	PCDHB12	TSS200	shore	0.417495
chr5	140593344	140593344	R	cg02797992	PCDHB13	TSS200	shore	0.309111
chr5	140602959	140602959	F	cg21522026	PCDHB14	TSS200	shore	0.312754
chr5	140619567	140619567	R	cg10553103	PCDHB19P	TSS200	shore	0.413539
chr5	140619586	140619586	F	cg25010500	PCDHB19P	TSS200	shore	0.328065
chr5	140624898	140624898	F	cg18606364	PCDHB15	TSS200	shore	0.446629
chr5	140625004	140625004	F	cg18664869	PCDHB15	TSS200	shore	0.316673
chr5	140625059	140625059	R	cg11368643	PCDHB15	TSS200	shore	0.45377
chr5	140625068	140625068	R	cg24951286	PCDHB15	TSS200	shore	0.367292
chr5	140625130	140625130	F	cg23941075	PCDHB15	TSS200	shore	0.326032
chr5	140683632	140683632	F	cg05845376	SLC25A2	TSS200	island	0.581968
chr5	140683670	140683670	F	cg25212131	SLC25A2	TSS200	island	0.370976
chr5	140683681	140683681	F	cg07039560	SLC25A2	TSS200	island	0.426715
chr5	140683699	140683699	F	cg21636683	SLC25A2	TSS200	island	0.318753
chr5	140734648	140734648	F	cg19037350	PCDHGA4	TSS200	shore	0.301471
chr5	140734758	140734758	F	cg23930711	PCDHGA4	TSS200	island	0.326932
chr5	140743798	140743798	F	cg19192159	PCDHGA5	TSS200	shore	0.356757
chr5	140749797	140749797	F	cg10742695	PCDHGB3	TSS200	shore	0.383184
chr5	140762232	140762232	R	cg15732498	PCDHGA7	TSS200	shore	0.3895
chr5	140800524	140800524	F	cg09207053	PCDHGA11	TSS200	shore	0.419126
chr5	149980486	149980486	R	cg08125125	SYNPO	TSS200	opensea	-0.32164
chr5	150326312	150326312	F	cg07499553	LOC134466	TSS200	shore	0.340838
chr5	150521254	150521254	F	cg02840890	ANXA6	TSS200	opensea	-0.307923
chr5	150521339	150521339	F	cg04150429	ANXA6	TSS200	opensea	-0.346143
chr5	150521392	150521392	R	cg10610249	ANXA6	TSS200	opensea	-0.324921
chr5	151066712	151066712	F	cg01524697	SPARC	TSS200	opensea	-0.307723
chr5	154092339	154092339	F	cg11742111	LARP1	TSS200	opensea	0.325316
chr5	154092426	154092426	F	cg03519907	LARP1	TSS200	opensea	0.3481
chr5	175976214	175976214	F	cg09734011	PCDH24	TSS200	opensea	0.304781
chr5	176784688	176784688	R	cg07086918	RGS14	TSS200	opensea	-0.350994
chr5	176784715	176784715	R	cg25461508	RGS14	TSS200	opensea	-0.385986
chr5	176784719	176784719	R	cg04466840	RGS14	TSS200	opensea	-0.370337
chr5	176784747	176784747	R	cg15591490	RGS14	TSS200	opensea	-0.411064
chr5	176784777	176784777	F	cg11370586	RGS14	TSS200	opensea	-0.337276
chr5	180018495	180018495	F	cg10508993	SCGB3A1	TSS200	island	0.374993
chr5	180018503	180018503	F	cg22859061	SCGB3A1	TSS200	island	0.426052
chr5	180018562	180018562	F	cg01934626	SCGB3A1	TSS200	island	0.42481
chr5	180018564	180018564	F	cg11916729	SCGB3A1	TSS200	island	0.375285
chr6	2903699	2903699	R	cg07844977	SERPINB9	TSS200	island	0.365439
chr6	2903704	2903704	R	cg22336806	SERPINB9	TSS200	island	0.399398
chr6	6588737	6588737	F	cg19190593	LY86	TSS200	opensea	-0.313812
chr6	26018058	26018058	F	cg14703002	HIST1H1A	TSS200	shelf	0.398247
chr6	26018074	26018074	R	cg23829024	HIST1H1A	TSS200	shelf	0.327125
chr6	26018084	26018084	R	cg15741433	HIST1H1A	TSS200	shelf	0.309744
chr6	26018127	26018127	F	cg05816193	HIST1H1A	TSS200	shelf	0.341487
chr6	26018185	26018185	F	cg14652095	HIST1H1A	TSS200	shelf	0.400084
chr6	28058789	28058789	R	cg11517269	ZSCAN12L1	TSS200	opensea	0.408667
chr6	28058856	28058856	F	cg18105139	ZSCAN12L1	TSS200	opensea	0.307809
chr6	28058911	28058911	F	cg17849569	ZSCAN12L1	TSS200	opensea	0.317318
chr6	28227068	28227068	R	cg17384889	NKAPL	TSS200	island	0.323413
chr6	28227079	28227079	R	cg18694169	NKAPL	TSS200	island	0.345179
chr6	28227085	28227085	R	cg10253847	NKAPL	TSS200	island	0.327304
chr6	28227091	28227091	F	cg01031101	NKAPL	TSS200	island	0.331605
chr6	28227093	28227093	F	cg09523275	NKAPL	TSS200	island	0.394017
chr6	29324075	29324075	F	cg07605826	OR5V1	TSS200	opensea	-0.308577
chr6	30043818	30043818	F	cg09530011	RNF39	TSS200	shore	0.304654
chr6	46293571	46293571	F	cg06665622	RCAN2	TSS200	opensea	-0.308693
chr6	49755043	49755043	F	cg12553321	PGK2	TSS200	opensea	-0.31852
chr6	49755105	49755105	R	cg21080533	PGK2	TSS200	opensea	-0.413392
chr6	49845001	49845001	R	cg03947300	CRISP1	TSS200	opensea	-0.307531
chr6	55192148	55192148	R	cg04956723	GFRAL	TSS200	opensea	-0.346452
chr6	74162063	74162063	R	cg24713667	C6orf150	TSS200	island	0.351984
chr6	74162072	74162072	R	cg20758982	C6orf150	TSS200	island	0.358139
chr6	74162074	74162074	F	cg17162475	C6orf150	TSS200	island	0.313073
chr6	74162089	74162089	F	cg05525106	C6orf150	TSS200	island	0.39294
chr6	116381957	116381957	R	cg18764771	FRK	TSS200	opensea	0.34472
chr6	116381976	116381976	R	cg15226275	FRK	TSS200	opensea	0.310975
chr6	125995336	125995336	R	cg15395013	LOC643623	TSS200	opensea	-0.306174
chr6	130182551	130182551	F	cg17626734	C6orf191	TSS200	opensea	-0.344992
chr6	160679974	160679974	R	cg19627213	SLC22A2	TSS200	shore	0.301319
chr6	163147999	163147999	R	cg06065608	PACRG	TSS200	shore	0.330106
chr6	168197667	168197667	R	cg00228390	C6orf123	TSS200	island	0.33011
chr7	26578547	26578547	R	cg12420683	KIAA0087	TSS200	opensea	-0.425878
chr7	92747455	92747455	R	cg17668728	SAMD9	TSS200	opensea	-0.377552
chr7	92848969	92848969	R	cg02544502	HEPACAM2	TSS200	opensea	-0.308979
chr7	93112319	93112319	R	cg16120102	MIR653	TSS200	opensea	-0.396888
chr7	94953956	94953956	F	cg17330251	PON1	TSS200	island	0.358894
chr7	94954059	94954059	F	cg01874867	PON1	TSS200	shore	0.367643
chr7	99775422	99775422	F	cg00048759	STAG3	TSS200	island	0.317198
chr7	99775443	99775443	F	cg13210467	STAG3	TSS200	island	0.33041
chr7	99775521	99775521	F	cg10084644	STAG3	TSS200	island	0.300765
chr7	116254947	116254947	R	cg19102672	LINC01510	TSS200	opensea	0.438854
chr7	127881280	127881280	R	cg19594666	LEP	TSS200	island	0.348487
chr7	127881293	127881293	R	cg11045943	LEP	TSS200	island	0.349045
chr7	127881298	127881298	R	cg26814075	LEP	TSS200	island	0.342544
chr7	129015370	129015370	F	cg07537912	AHCYL2	TSS200	opensea	0.313376
chr7	134891926	134891926	R	cg26312916	MIR6509	TSS200	opensea	0.302296
chr7	138458847	138458847	F	cg18657953	ATP6V0A4	TSS200	opensea	0.447016
chr8	39771219	39771219	F	cg07866399	IDO1	TSS200	opensea	-0.313148
chr8	57472469	57472469	F	cg12398777	LINC00968	TSS200	opensea	-0.319128
chr8	65711522	65711522	R	cg19424531	CYP7B1	TSS200	island	0.327788
chr8	87081978	87081978	R	cg09506473	PSKH2	TSS200	island	0.325613
chr8	87082014	87082014	R	cg04470072	PSKH2	TSS200	island	0.340427
chr8	107072814	107072814	R	cg21451768	ZFPM2-AS1	TSS200	opensea	-0.313966
chr8	125259814	125259814	F	cg27344515	LOC101927588	TSS200	opensea	-0.439673
chr8	128808017	128808017	F	cg25247520	MIR1204	TSS200	shore	-0.304838
chr8	128808063	128808063	F	cg11201447	MIR1204	TSS200	shore	-0.32697
chr9	14180824	14180824	R	cg10302019	NFIB	TSS200	opensea	0.318776
chr9	21385440	21385440	R	cg13235447	IFNA2	TSS200	opensea	-0.335359
chr9	22646113	22646113	F	cg22574288	LINC01239	TSS200	opensea	-0.424877
chr9	79056558	79056558	F	cg08329501	GCNT1	TSS200	opensea	-0.336245
chr9	86571689	86571689	F	cg11565797	C9orf64	TSS200	island	0.407023
chr9	86571691	86571691	F	cg09009519	C9orf64	TSS200	island	0.393749
chr9	86571814	86571814	R	cg01614478	C9orf64	TSS200	island	0.427478
chr9	96846724	96846724	R	cg10377153	PTPDC1	TSS200	opensea	-0.345674
chr9	123631327	123631327	F	cg03699700	PHF19	TSS200	island	0.342043
chr9	123657192	123657192	R	cg11431144	PHF19	TSS200	shore	0.549526
chr9	123657230	123657230	F	cg06125825	PHF19	TSS200	shore	0.402647
chr9	124329317	124329317	F	cg01761369	DAB2IP	TSS200	opensea	-0.320077
chr9	125512005	125512005	F	cg25284223	OR1L6	TSS200	opensea	-0.327106
chr9	130541200	130541200	R	cg11141774	SH2D3C	TSS200	opensea	-0.303554
chr9	130700868	130700868	R	cg02557335	DPM2	TSS200	shore	0.398349
chr9	130700923	130700923	F	cg14395885	DPM2	TSS200	shore	0.37932
chr9	131007472	131007472	F	cg14723090	MIR3154	TSS200	opensea	-0.309672
chr9	138531399	138531399	R	cg08367260	GLT6D1	TSS200	opensea	-0.320713
chr9	138531405	138531405	R	cg06363085	GLT6D1	TSS200	opensea	-0.374665
chr9	139414185	139414185	F	cg13304430	MIR4673	TSS200	shore	0.358344
chr1	1369934	1369934	R	cg14667273	VWA1	TSS1500	shore	-0.303798
chr1	1370013	1370013	F	cg20138749	VWA1	TSS1500	shore	-0.356766
chr1	2324396	2324396	R	cg03533858	MORN1	TSS1500	shore	-0.334994
chr1	18806517	18806517	R	cg27451581	KLHDC7A	TSS1500	shelf	0.300382
chr1	22110392	22110392	F	cg06757381	USP48	TSS1500	shore	0.376822
chr1	22110598	22110598	R	cg08862774	USP48	TSS1500	shore	0.319007
chr1	23496304	23496304	F	cg26530485	LUZP1	TSS1500	opensea	-0.403168
chr1	24644596	24644596	R	cg08603845	GRHL3	TSS1500	shelf	-0.382166
chr1	24644925	24644925	R	cg26091557	GRHL3	TSS1500	shelf	-0.371193
chr1	24648545	24648545	R	cg01231985	GRHL3	TSS1500	island	0.335283
chr1	24648551	24648551	R	cg01590970	GRHL3	TSS1500	island	0.309324
chr1	24648851	24648851	F	cg22176324	GRHL3	TSS1500	island	0.305638
chr1	32041507	32041507	R	cg16103203	TINAGL1	TSS1500	opensea	0.303068
chr1	32041605	32041605	F	cg10530055	TINAGL1	TSS1500	opensea	0.304343
chr1	32041732	32041732	F	cg03314569	TINAGL1	TSS1500	opensea	0.383689
chr1	42921582	42921582	R	cg06520846	PPCS	TSS1500	shore	0.311172
chr1	42921584	42921584	R	cg06346081	PPCS	TSS1500	shore	0.33189
chr1	44401433	44401433	R	cg23212751	ARTN	TSS1500	shore	0.315054
chr1	67217826	67217826	F	cg08857729	TCTEX1D1	TSS1500	shore	0.307893
chr1	67217853	67217853	R	cg24110050	TCTEX1D1	TSS1500	shore	0.362321
chr1	68299493	68299493	F	cg25189904	GNG12	TSS1500	shore	0.304867
chr1	94051106	94051106	R	cg08141300	BCAR3	TSS1500	opensea	0.336144
chr1	95285252	95285252	R	cg15571882	SLC44A3	TSS1500	shore	0.301125
chr1	95698827	95698827	F	cg01206378	RWDD3	TSS1500	shore	0.332534
chr1	95698917	95698917	F	cg05382022	RWDD3	TSS1500	shore	0.362381
chr1	95698924	95698924	F	cg20701556	RWDD3	TSS1500	shore	0.422096
chr1	95698954	95698954	F	cg24808901	RWDD3	TSS1500	shore	0.430467
chr1	95699037	95699037	R	cg26537280	RWDD3	TSS1500	shore	0.304999
chr1	95699097	95699097	F	cg03123541	RWDD3	TSS1500	shore	0.462276
chr1	111412802	111412802	R	cg02266253	CD53	TSS1500	opensea	-0.338013
chr1	111414364	111414364	R	cg07314983	CD53	TSS1500	opensea	-0.37682
chr1	111414984	111414984	F	cg10105218	CD53	TSS1500	opensea	-0.300939
chr1	111415232	111415232	F	cg10516886	CD53	TSS1500	opensea	-0.366555
chr1	111832109	111832109	F	cg08129490	CHIA	TSS1500	opensea	-0.344492
chr1	113750311	113750311	F	cg07458778	LOC643441	TSS1500	opensea	0.299824
chr1	116915122	116915122	R	cg09580336	ATP1A1	TSS1500	shore	0.356059
chr1	119532655	119532655	R	cg03942051	TBX15	TSS1500	shore	0.323891
chr1	119532773	119532773	F	cg02362103	TBX15	TSS1500	shore	0.397519
chr1	119532925	119532925	R	cg23371746	TBX15	TSS1500	shore	0.343748
chr1	145096125	145096125	R	cg25133786	SEC22B	TSS1500	shore	0.305103
chr1	150121302	150121302	F	cg07759237	PLEKHO1	TSS1500	shore	-0.308793
chr1	151482883	151482883	F	cg01801283	CGN	TSS1500	shore	0.315858
chr1	156030669	156030669	F	cg08491066	RAB25	TSS1500	opensea	0.317576
chr1	157671177	157671177	R	cg04429688	FCRL3	TSS1500	opensea	-0.33954
chr1	157671759	157671759	F	cg15202552	FCRL3	TSS1500	opensea	-0.390502
chr1	158258083	158258083	R	cg04592527	CD1C	TSS1500	opensea	-0.402313
chr1	158258802	158258802	R	cg27534912	CD1C	TSS1500	opensea	-0.382903
chr1	158259268	158259268	F	cg16993682	CD1C	TSS1500	opensea	-0.427606
chr1	158322966	158322966	R	cg08551551	CD1E	TSS1500	opensea	-0.362453
chr1	158370467	158370467	F	cg21348284	OR10T2	TSS1500	opensea	-0.461992
chr1	158391119	158391119	R	cg01733284	OR10K2	TSS1500	opensea	-0.305847
chr1	158434956	158434956	R	cg27510497	OR10K1	TSS1500	opensea	-0.343023
chr1	158518363	158518363	F	cg03225787	OR6Y1	TSS1500	opensea	-0.384197
chr1	158534679	158534679	R	cg20778958	OR6P1	TSS1500	opensea	-0.319733
chr1	158575318	158575318	R	cg11879548	OR10Z1	TSS1500	opensea	-0.369316
chr1	158575773	158575773	F	cg04436634	OR10Z1	TSS1500	opensea	-0.354884
chr1	158656718	158656718	R	cg22730004	SPTA1	TSS1500	opensea	-0.448459
chr1	158671705	158671705	R	cg18453528	OR6K2	TSS1500	opensea	-0.340978
chr1	158688775	158688775	R	cg08918576	OR6K3	TSS1500	opensea	-0.361002
chr1	158688804	158688804	R	cg12811284	OR6K3	TSS1500	opensea	-0.359663
chr1	158737820	158737820	R	cg14514991	OR6N1	TSS1500	opensea	-0.341649
chr1	158748432	158748432	R	cg23101171	OR6N2	TSS1500	opensea	-0.322711
chr1	158799935	158799935	R	cg25119415	MNDA	TSS1500	opensea	-0.379069
chr1	158800024	158800024	R	cg05304729	MNDA	TSS1500	opensea	-0.396856
chr1	158900088	158900088	R	cg21576886	PYHIN1	TSS1500	opensea	-0.301311
chr1	159258877	159258877	R	cg14696870	FCER1A	TSS1500	opensea	-0.328978
chr1	159408848	159408848	F	cg06406347	OR10J1	TSS1500	opensea	-0.406091
chr1	159409207	159409207	F	cg15700197	OR10J1	TSS1500	opensea	-0.51903
chr1	159507162	159507162	R	cg26043322	OR10J5	TSS1500	opensea	-0.37583
chr1	159556997	159556997	F	cg05919685	APCS	TSS1500	opensea	-0.42313
chr1	159685684	159685684	F	cg24976805	CRP	TSS1500	opensea	-0.324155
chr1	160050275	160050275	R	cg14315271	KCNJ9	TSS1500	shelf	-0.305708
chr1	161147718	161147718	R	cg20740051	B4GALT3	TSS1500	shore	0.32885
chr1	162383000	162383000	F	cg21501207	SH2D1B	TSS1500	opensea	-0.304852
chr1	173176090	173176090	F	cg22034554	TNFSF4	TSS1500	opensea	-0.298773
chr1	173176731	173176731	R	cg18459392	TNFSF4	TSS1500	opensea	-0.305308
chr1	173795086	173795086	R	cg17011686	CENPL	TSS1500	shore	-0.401247
chr1	185014181	185014181	F	cg11320084	RNF2	TSS1500	shore	0.341237
chr1	202778869	202778869	R	cg21105875	KDM5B	TSS1500	shore	0.320004
chr1	204183519	204183519	R	cg02858402	GOLT1A	TSS1500	opensea	0.309465
chr1	204183603	204183603	R	cg20510272	GOLT1A	TSS1500	opensea	0.325846
chr1	207924376	207924376	R	cg21066685	CD46	TSS1500	shore	0.309131
chr1	207924482	207924482	R	cg04290171	CD46	TSS1500	shore	0.308709
chr1	212964388	212964388	F	cg24246313	TATDN3	TSS1500	shore	-0.392209
chr1	217311531	217311531	F	cg25755575	ESRRG	TSS1500	island	0.321551
chr1	221051538	221051538	R	cg13547928	HLX	TSS1500	shore	0.363708
chr1	222910009	222910009	R	cg18665384	FAM177B	TSS1500	opensea	0.299812
chr1	229406360	229406360	F	cg23959311	RAB4A	TSS1500	shore	0.402955
chr1	229406520	229406520	R	cg06646021	RAB4A	TSS1500	shore	0.33606
chr1	229406534	229406534	R	cg05463325	RAB4A	TSS1500	shore	0.350617
chr1	236958020	236958020	R	cg08751988	MTR	TSS1500	shore	0.406078
chr1	236958030	236958030	F	cg15518992	MTR	TSS1500	shore	0.389852
chr1	246728663	246728663	F	cg17815049	CNST	TSS1500	shore	-0.371406
chr1	246728677	246728677	R	cg12910806	CNST	TSS1500	shore	-0.379068
chr1	247242514	247242514	F	cg18191060	ZNF670	TSS1500	shore	0.308432
chr1	247242539	247242539	F	cg26536593	ZNF670	TSS1500	shore	0.310619
chr1	247711545	247711545	F	cg06167827	GCSAML	TSS1500	opensea	-0.32927
chr1	247711595	247711595	F	cg16385583	C1orf150	TSS1500	opensea	-0.399347
chr1	247877172	247877172	F	cg17294440	OR6F1	TSS1500	opensea	-0.317253
chr1	247922050	247922050	R	cg13482251	OR1C1	TSS1500	opensea	-0.328277
chr1	248110661	248110661	F	cg18857759	OR2L8	TSS1500	opensea	-0.321789
chr1	248184944	248184944	F	cg27483432	OR2L5	TSS1500	opensea	-0.324797
chr1	248307171	248307171	R	cg23907520	OR2M5	TSS1500	opensea	-0.324692
chr1	248401797	248401797	F	cg10362698	OR2M4	TSS1500	opensea	-0.324901
chr1	248438008	248438008	F	cg25338320	OR2T33	TSS1500	opensea	-0.331104
chr1	248568187	248568187	R	cg16274221	OR2T1	TSS1500	opensea	-0.335783
chr10	7859623	7859623	R	cg03672997	TAF3	TSS1500	shore	0.340581
chr10	17269643	17269643	R	cg23821329	VIM	TSS1500	shore	-0.322937
chr10	22632995	22632995	R	cg09429160	SPAG6	TSS1500	shore	0.323674
chr10	22633075	22633075	F	cg03686496	SPAG6	TSS1500	shore	0.339661
chr10	28820367	28820367	R	cg24792245	WAC	TSS1500	shore	0.33495
chr10	37597888	37597888	R	cg27590688	LINC00993	TSS1500	opensea	-0.365058
chr10	49608385	49608385	R	cg03883275	MAPK8	TSS1500	opensea	0.352228
chr10	62761575	62761575	F	cg24205914	RHOBTB1	TSS1500	island	0.309469
chr10	64892673	64892673	F	cg13216112	NRBF2	TSS1500	shore	-0.309522
chr10	77541834	77541834	R	cg10908050	C10orf11	TSS1500	opensea	0.385193
chr10	82050793	82050793	F	cg00977842	MAT1A	TSS1500	opensea	0.358878
chr10	85985779	85985779	F	cg19717640	LRIT2	TSS1500	opensea	-0.30016
chr10	91060825	91060825	R	cg13111928	IFIT2	TSS1500	opensea	0.408236
chr10	93682808	93682808	R	cg03778899	BTAF1	TSS1500	shore	-0.301016
chr10	94351376	94351376	R	cg07673866	KIF11	TSS1500	island	0.362338
chr10	94351686	94351686	F	cg04344917	KIF11	TSS1500	shore	0.356779
chr10	94820236	94820236	R	cg16577651	CYP26C1	TSS1500	island	0.422022
chr10	94820376	94820376	F	cg07225966	CYP26C1	TSS1500	island	0.348472
chr10	95361933	95361933	F	cg08950537	RBP4	TSS1500	shore	0.304966
chr10	95361951	95361951	R	cg03395461	RBP4	TSS1500	shore	0.304299
chr10	100996579	100996579	R	cg00877329	HPSE2	TSS1500	shelf	0.313926
chr10	100996825	100996825	F	cg26067760	HPSE2	TSS1500	shelf	0.425928
chr10	100997023	100997023	F	cg25034395	HPSE2	TSS1500	shelf	0.346371
chr10	102731104	102731104	F	cg21372337	SEMA4G	TSS1500	shore	0.309994
chr10	104954118	104954118	F	cg20912449	NT5C2	TSS1500	shore	-0.308224
chr10	112835507	112835507	R	cg09133462	ADRA2A	TSS1500	shore	-0.302512
chr10	120102253	120102253	R	cg20149281	FAM204A	TSS1500	shore	0.308626
chr10	122610303	122610303	F	cg13596132	WDR11	TSS1500	shore	-0.304876
chr10	129535138	129535138	R	cg04617948	FOXI2	TSS1500	island	0.481029
chr10	129535186	129535186	R	cg25539045	FOXI2	TSS1500	island	0.498437
chr10	134144355	134144355	R	cg10200298	LRRC27	TSS1500	shore	-0.339179
chr11	628603	628603	R	cg26736232	SCT	TSS1500	shore	-0.410232
chr11	2156699	2156699	F	cg01668279	MIR483	TSS1500	shelf	-0.329448
chr11	2397201	2397201	R	cg21843586	CD81	TSS1500	shore	0.379862
chr11	2397255	2397255	R	cg15289899	CD81	TSS1500	shore	0.435581
chr11	2397323	2397323	F	cg05102670	CD81	TSS1500	shore	0.305037
chr11	2397350	2397350	F	cg14022995	CD81	TSS1500	shore	0.352229
chr11	2397523	2397523	R	cg00319334	CD81	TSS1500	shore	0.346798
chr11	2397538	2397538	R	cg14398963	CD81	TSS1500	shore	0.321422
chr11	2397655	2397655	R	cg02078292	CD81	TSS1500	shore	0.449641
chr11	2397773	2397773	R	cg12845432	CD81	TSS1500	shore	0.391713
chr11	2397784	2397784	R	cg02249841	CD81	TSS1500	shore	0.362839
chr11	2397811	2397811	F	cg01492909	CD81	TSS1500	shore	0.347736
chr11	2397831	2397831	F	cg05490366	CD81	TSS1500	shore	0.323911
chr11	2397977	2397977	F	cg07804260	CD81	TSS1500	shore	0.325548
chr11	2423159	2423159	R	cg23054121	TSSC4	TSS1500	shore	-0.320668
chr11	5346556	5346556	F	cg15397564	OR51B2	TSS1500	opensea	-0.344622
chr11	5442215	5442215	F	cg11450928	OR51Q1	TSS1500	opensea	-0.307186
chr11	6024966	6024966	F	cg24949579	OR56A4	TSS1500	opensea	-0.344284
chr11	7695485	7695485	R	cg24575083	CYB5R2	TSS1500	island	0.301233
chr11	7695525	7695525	R	cg02982294	CYB5R2	TSS1500	island	0.31118
chr11	7728814	7728814	F	cg13563074	OVCH2	TSS1500	opensea	-0.326205
chr11	7847777	7847777	F	cg18531242	OR5P3	TSS1500	opensea	-0.303774
chr11	7847876	7847876	F	cg16226642	OR5P3	TSS1500	opensea	-0.34043
chr11	7848142	7848142	F	cg25541968	OR5P3	TSS1500	opensea	-0.416808
chr11	9685054	9685054	R	cg23440095	SWAP70	TSS1500	shore	0.360445
chr11	9685299	9685299	R	cg15044073	SWAP70	TSS1500	shore	0.303924
chr11	18193360	18193360	R	cg16446783	MRGPRX4	TSS1500	opensea	-0.329813
chr11	19083159	19083159	F	cg16903152	MRGPRX2	TSS1500	opensea	-0.305465
chr11	19083542	19083542	R	cg10422455	MRGPRX2	TSS1500	opensea	-0.396776
chr11	31390770	31390770	F	cg21433330	DNAJC24	TSS1500	shore	0.307797
chr11	35442225	35442225	R	cg25963980	SLC1A2	TSS1500	shore	0.301879
chr11	48345293	48345293	F	cg14390254	OR4C3	TSS1500	opensea	-0.301842
chr11	55110233	55110233	F	cg05013696	OR4A16	TSS1500	opensea	-0.337683
chr11	55134345	55134345	R	cg21280420	OR4A15	TSS1500	opensea	-0.297924
chr11	55321480	55321480	R	cg04174658	OR4C15	TSS1500	opensea	-0.302154
chr11	55431584	55431584	R	cg20623702	OR4C6	TSS1500	opensea	-0.300507
chr11	55431626	55431626	F	cg07748880	OR4C6	TSS1500	opensea	-0.304449
chr11	55577775	55577775	F	cg05788138	OR5L1	TSS1500	opensea	-0.401709
chr11	55605161	55605161	F	cg25384000	OR5D16	TSS1500	opensea	-0.330308
chr11	55705149	55705149	F	cg16859831	OR5I1	TSS1500	opensea	-0.336216
chr11	55705284	55705284	F	cg17120792	OR5I1	TSS1500	opensea	-0.423743
chr11	55736968	55736968	R	cg05343512	OR10AG1	TSS1500	opensea	-0.408884
chr11	55737045	55737045	R	cg18099058	OR10AG1	TSS1500	opensea	-0.339592
chr11	55737423	55737423	R	cg06189459	OR10AG1	TSS1500	opensea	-0.359643
chr11	55796572	55796572	F	cg17060964	OR5AS1	TSS1500	opensea	-0.342102
chr11	55906304	55906304	R	cg13055487	OR8J3	TSS1500	opensea	-0.332502
chr11	56059643	56059643	F	cg22629065	OR8H1	TSS1500	opensea	-0.304827
chr11	56112384	56112384	R	cg25545500	OR8K1	TSS1500	opensea	-0.371293
chr11	56126517	56126517	F	cg27474322	OR8J1	TSS1500	opensea	-0.345566
chr11	56187177	56187177	F	cg15434232	OR5R1	TSS1500	opensea	-0.322384
chr11	56312057	56312057	R	cg11410694	OR5M11	TSS1500	opensea	-0.336027
chr11	56381325	56381325	R	cg09337062	OR5M1	TSS1500	opensea	-0.381697
chr11	56430801	56430801	F	cg24376337	OR5AR1	TSS1500	opensea	-0.303422
chr11	56756159	56756159	R	cg14696931	OR5AK2	TSS1500	opensea	-0.335209
chr11	57956794	57956794	F	cg19350767	OR9Q2	TSS1500	opensea	-0.36269
chr11	58036281	58036281	R	cg21666031	OR10W1	TSS1500	opensea	-0.351816
chr11	58037175	58037175	F	cg16092393	OR10W1	TSS1500	opensea	-0.322502
chr11	58127944	58127944	F	cg05655457	OR5B17	TSS1500	opensea	-0.334931
chr11	59131003	59131003	R	cg16167166	OR5AN1	TSS1500	opensea	-0.310504
chr11	60047808	60047808	F	cg07988891	MS4A4A	TSS1500	opensea	-0.461753
chr11	61594708	61594708	F	cg13299762	FADS2	TSS1500	shore	-0.308885
chr11	64863232	64863232	F	cg13853761	C11orf2	TSS1500	shore	0.305582
chr11	68451699	68451699	R	cg02340541	GAL	TSS1500	island	0.363262
chr11	71956678	71956678	R	cg15025140	PHOX2A	TSS1500	shore	0.313667
chr11	76493489	76493489	R	cg20708135	TSKU	TSS1500	shore	-0.380513
chr11	78243709	78243709	R	cg09024049	LOC101928896	TSS1500	opensea	0.325808
chr11	89655800	89655800	R	cg01283766	TRIM49D2	TSS1500	opensea	-0.316276
chr11	93277161	93277161	F	cg06549238	C11orf75	TSS1500	shore	0.42234
chr11	93277178	93277178	F	cg15456144	C11orf75	TSS1500	shore	0.308235
chr11	93277191	93277191	F	cg06895640	C11orf75	TSS1500	shore	0.347036
chr11	93469286	93469286	R	cg10008099	SNORA40	TSS1500	opensea	-0.310727
chr11	93475962	93475962	F	cg26570233	TAF1D	TSS1500	shore	0.300272
chr11	94883425	94883425	F	cg00832563	LOC101929295	TSS1500	island	0.445841
chr11	96076778	96076778	F	cg09850372	MAML2	TSS1500	opensea	-0.329337
chr11	96076794	96076794	R	cg26328687	MAML2	TSS1500	opensea	-0.345693
chr11	113929810	113929810	F	cg25744613	ZBTB16	TSS1500	island	0.315711
chr11	121971232	121971232	F	cg20475322	MIR125B1	TSS1500	opensea	-0.336956
chr11	121971247	121971247	F	cg24603444	MIR125B1	TSS1500	opensea	-0.331255
chr11	121971744	121971744	R	cg01837269	MIR125B1	TSS1500	opensea	-0.33311
chr11	124609216	124609216	F	cg23575319	NRGN	TSS1500	shore	0.372479
chr11	130185384	130185384	F	cg02400092	ZBTB44	TSS1500	shore	0.372391
chr11	130185670	130185670	F	cg05227350	ZBTB44	TSS1500	shore	0.37759
chr12	9103530	9103530	R	cg22129885	M6PR	TSS1500	shore	-0.325853
chr12	10022676	10022676	F	cg13819304	CLEC2B	TSS1500	opensea	-0.318175
chr12	10022688	10022688	F	cg12591315	CLEC2B	TSS1500	opensea	-0.316605
chr12	12509705	12509705	R	cg15110296	LOH12CR1	TSS1500	shore	-0.340158
chr12	14721072	14721072	F	cg25873104	PLBD1	TSS1500	island	0.311798
chr12	21283013	21283013	R	cg11180750	SLCO1B1	TSS1500	opensea	-0.303529
chr12	22198837	22198837	F	cg02656474	CMAS	TSS1500	shore	-0.324826
chr12	25055563	25055563	R	cg15096563	BCAT1	TSS1500	shore	0.41471
chr12	49111374	49111374	F	cg01412462	CCNT1	TSS1500	shore	0.350607
chr12	49111395	49111395	R	cg10924779	CCNT1	TSS1500	shore	0.344906
chr12	49365989	49365989	R	cg10280636	WNT10B	TSS1500	shore	0.365821
chr12	49366152	49366152	F	cg07462861	WNT10B	TSS1500	shore	0.322469
chr12	49366217	49366217	F	cg25594307	WNT10B	TSS1500	shore	0.405554
chr12	49366536	49366536	F	cg24626581	WNT10B	TSS1500	shelf	0.366172
chr12	49366538	49366538	F	cg05164634	WNT10B	TSS1500	shelf	0.387489
chr12	50298158	50298158	F	cg21955005	FAIM2	TSS1500	shore	-0.326726
chr12	51786489	51786489	F	cg15127250	GALNT6	TSS1500	shore	0.416583
chr12	51786547	51786547	R	cg25360385	GALNT6	TSS1500	shore	0.323078
chr12	55378884	55378884	F	cg08849829	TESPA1	TSS1500	opensea	-0.333459
chr12	55378912	55378912	F	cg17881208	KIAA0748	TSS1500	opensea	-0.346707
chr12	55864950	55864950	F	cg03248834	OR6C70	TSS1500	opensea	-0.312253
chr12	58003774	58003774	R	cg03309176	GEFT	TSS1500	shore	0.308414
chr12	69139390	69139390	F	cg24502382	SLC35E3	TSS1500	shore	-0.31964
chr12	72668243	72668243	R	cg01976374	TRHDE-AS1	TSS1500	shore	0.327178
chr12	80836629	80836629	F	cg20238308	PTPRQ	TSS1500	opensea	-0.317148
chr12	80836867	80836867	F	cg15535380	PTPRQ	TSS1500	opensea	-0.323022
chr12	94131844	94131844	F	cg09427574	LOC101928731	TSS1500	opensea	0.353758
chr12	95942907	95942907	F	cg13879483	USP44	TSS1500	island	0.366627
chr12	95942964	95942964	R	cg07783282	USP44	TSS1500	island	0.360725
chr12	95943114	95943114	R	cg09883286	USP44	TSS1500	shore	0.430943
chr12	95945498	95945498	R	cg25590081	USP44	TSS1500	shelf	0.29844
chr12	95945610	95945610	R	cg09530530	USP44	TSS1500	shelf	0.349029
chr12	97300410	97300410	R	cg21721825	NEDD1	TSS1500	shore	-0.312663
chr12	97300429	97300429	F	cg15621458	NEDD1	TSS1500	shore	-0.321705
chr12	102269622	102269622	R	cg26779905	DRAM1	TSS1500	shore	0.304733
chr12	105478582	105478582	F	cg16204509	ALDH1L2	TSS1500	shore	0.371833
chr12	108907705	108907705	R	cg03620729	FICD	TSS1500	shore	-0.307903
chr12	111021817	111021817	R	cg16073273	PPTC7	TSS1500	shore	0.305473
chr12	113133584	113133584	R	cg20470083	MIR1302-1	TSS1500	opensea	-0.301735
chr12	117743333	117743333	F	cg21417310	NOS1	TSS1500	opensea	-0.347584
chr12	120030203	120030203	R	cg04373566	TMEM233	TSS1500	shore	-0.302062
chr12	121415506	121415506	R	cg23661013	HNF1A	TSS1500	shore	0.341959
chr12	126106447	126106447	R	cg00526628	TMEM132B	TSS1500	opensea	-0.319896
chr13	30948716	30948716	R	cg27506442	LOC100188949	TSS1500	opensea	-0.374825
chr13	31041221	31041221	F	cg01504447	HMGB1	TSS1500	opensea	-0.316748
chr13	33850931	33850931	R	cg18653997	STARD13-AS	TSS1500	opensea	0.366572
chr13	41056288	41056288	R	cg04509682	LOC646982	TSS1500	opensea	0.301048
chr13	44595496	44595496	R	cg00735454	LOC121838	TSS1500	opensea	0.341504
chr13	44595666	44595666	F	cg10115564	LOC121838	TSS1500	opensea	0.302482
chr13	47371987	47371987	F	cg04118119	ESD	TSS1500	shore	0.387888
chr13	49793170	49793170	F	cg07447742	MLNR	TSS1500	shore	0.418206
chr13	50700845	50700845	F	cg20733077	DLEU2	TSS1500	island	-0.301574
chr13	52703615	52703615	R	cg18057513	NEK5	TSS1500	shore	0.364204
chr13	52769875	52769875	F	cg06259025	THSD1P	TSS1500	island	0.305107
chr13	52769951	52769951	F	cg24678163	THSD1P	TSS1500	shore	0.304568
chr13	54388934	54388934	R	cg16755041	LINC00558	TSS1500	opensea	-0.321222
chr13	73354967	73354967	R	cg00361040	PIBF1	TSS1500	shore	-0.302506
chr13	78270580	78270580	F	cg16197568	SLAIN1	TSS1500	shore	-0.298455
chr13	88794203	88794203	F	cg07869814	LOC105370306	TSS1500	opensea	-0.311315
chr13	89889903	89889903	F	cg24516953	LINC01047	TSS1500	opensea	-0.326718
chr13	91579373	91579373	R	cg02347881	LOC144776	TSS1500	opensea	-0.301553
chr13	99960957	99960957	R	cg10736330	GPR183	TSS1500	opensea	-0.327616
chr14	20664880	20664880	F	cg27185158	OR11G2	TSS1500	opensea	-0.344313
chr14	20665187	20665187	R	cg15270173	OR11G2	TSS1500	opensea	-0.362902
chr14	20690430	20690430	F	cg00284121	OR11H6	TSS1500	opensea	-0.311523
chr14	21059948	21059948	F	cg05381902	RNASE12	TSS1500	opensea	-0.301585
chr14	24769927	24769927	R	cg12699619	DHRS1	TSS1500	shore	-0.327981
chr14	24978681	24978681	F	cg01201932	CMA1	TSS1500	opensea	-0.344459
chr14	37052694	37052694	F	cg00058576	NKX2-8	TSS1500	island	0.318591
chr14	54975716	54975716	F	cg11825941	CGRRF1	TSS1500	shore	-0.299621
chr14	57960971	57960971	F	cg01584483	C14orf105	TSS1500	opensea	0.30745
chr14	57960976	57960976	F	cg15661409	C14orf105	TSS1500	opensea	0.338475
chr14	57960985	57960985	F	cg14102434	C14orf105	TSS1500	opensea	0.335037
chr14	67879126	67879126	F	cg24995657	PLEK2	TSS1500	island	0.324822
chr14	74893169	74893169	F	cg21931419	TMEM90A	TSS1500	island	0.316887
chr14	88460078	88460078	R	cg16679708	GALC	TSS1500	shore	0.307358
chr14	96180842	96180842	F	cg04313756	TCL1A	TSS1500	island	0.357941
chr14	96180847	96180847	F	cg17717124	TCL1A	TSS1500	island	0.444366
chr14	107092283	107092283	R	cg19481727	MIR7641-2	TSS1500	opensea	0.306654
chr15	25494800	25494800	R	cg19434795	SNORD115-44	TSS1500	opensea	-0.345863
chr15	40860293	40860293	R	cg21112512	RPUSD2	TSS1500	shore	-0.325911
chr15	44969539	44969539	F	cg09511690	PATL2	TSS1500	opensea	-0.313081
chr15	59279406	59279406	F	cg26312935	RNF111	TSS1500	shore	-0.309423
chr15	64456365	64456365	F	cg05941378	PPIB	TSS1500	shore	0.343752
chr15	69590255	69590255	F	cg20082641	PAQR5	TSS1500	shore	0.370669
chr15	69590852	69590852	R	cg17074353	PAQR5	TSS1500	shore	0.379208
chr15	69590937	69590937	F	cg00642615	PAQR5	TSS1500	shore	0.362855
chr15	69605332	69605332	R	cg08199304	PAQR5	TSS1500	opensea	0.32204
chr15	69605418	69605418	F	cg00098345	PAQR5	TSS1500	opensea	0.346848
chr15	74501584	74501584	F	cg23719157	STRA6	TSS1500	opensea	-0.382734
chr15	75199810	75199810	R	cg13906792	C15orf17	TSS1500	shore	0.319287
chr15	77518882	77518882	R	cg06817669	C15orf5	TSS1500	opensea	0.307424
chr15	83953998	83953998	R	cg02713760	BNC1	TSS1500	shore	0.309098
chr15	86162179	86162179	R	cg25445104	AKAP13	TSS1500	opensea	-0.366074
chr15	86162933	86162933	R	cg09427131	AKAP13	TSS1500	opensea	-0.348746
chr15	94840930	94840930	R	cg08791382	MCTP2	TSS1500	opensea	-0.329374
chr15	94840953	94840953	R	cg12299554	MCTP2	TSS1500	opensea	-0.323789
chr16	474271	474271	F	cg09555736	RAB11FIP3	TSS1500	shore	-0.37658
chr16	474430	474430	F	cg02102075	RAB11FIP3	TSS1500	shore	-0.311938
chr16	474528	474528	R	cg03363565	RAB11FIP3	TSS1500	shore	-0.326694
chr16	2013573	2013573	F	cg26876834	SNHG9	TSS1500	shore	-0.364417
chr16	3931489	3931489	R	cg00039463	CREBBP	TSS1500	island	0.304517
chr16	19427533	19427533	F	cg23394562	TMC5	TSS1500	opensea	-0.34224
chr16	20339175	20339175	F	cg19238840	GP2	TSS1500	opensea	-0.300825
chr16	20753477	20753477	F	cg02515467	THUMPD1	TSS1500	shore	0.345577
chr16	24682982	24682982	F	cg24150233	LINC01567	TSS1500	opensea	-0.346054
chr16	29984665	29984665	R	cg10316764	TAOK2	TSS1500	island	0.383857
chr16	30661534	30661534	F	cg03175771	PRR14	TSS1500	shore	0.355514
chr16	30661708	30661708	R	cg06131802	PRR14	TSS1500	shore	0.339982
chr16	56703400	56703400	R	cg05958050	MT1G	TSS1500	island	0.31183
chr16	57832283	57832283	F	cg09619020	KIFC3	TSS1500	shelf	0.303321
chr16	57832309	57832309	F	cg04084026	KIFC3	TSS1500	shelf	0.35323
chr16	59790180	59790180	R	cg07570113	LOC644649	TSS1500	shore	-0.466809
chr16	66637701	66637701	R	cg25698564	CMTM3	TSS1500	shore	-0.345468
chr16	66637888	66637888	R	cg22227603	CMTM3	TSS1500	shore	-0.299853
chr16	66637902	66637902	R	cg15855767	CMTM3	TSS1500	shore	-0.331107
chr16	66637919	66637919	R	cg16335762	CMTM3	TSS1500	shore	-0.325053
chr16	66953432	66953432	R	cg07925867	CDH16	TSS1500	shelf	0.311366
chr16	66954273	66954273	R	cg06371478	CDH16	TSS1500	shore	0.312564
chr16	71878874	71878874	R	cg17043801	ATXN1L	TSS1500	shore	0.415435
chr16	84327869	84327869	F	cg01264765	WFDC1	TSS1500	shore	-0.337891
chr16	84852909	84852909	R	cg07207789	CRISPLD2	TSS1500	shore	0.300667
chr17	202902	202902	R	cg13702144	RPH3AL	TSS1500	shelf	0.38699
chr17	202988	202988	F	cg19131699	RPH3AL	TSS1500	shelf	0.353501
chr17	203087	203087	F	cg02671171	RPH3AL	TSS1500	shelf	0.46886
chr17	1467083	1467083	R	cg23379291	PITPNA	TSS1500	shore	-0.357759
chr17	3117953	3117953	R	cg25607161	OR1A1	TSS1500	opensea	-0.304166
chr17	3705875	3705875	R	cg06468347	ITGAE	TSS1500	opensea	-0.313504
chr17	4802532	4802532	F	cg09826019	C17orf107	TSS1500	island	0.305193
chr17	4844722	4844722	F	cg04958703	SLC25A11	TSS1500	shore	-0.302753
chr17	6898604	6898604	F	cg12908125	ALOX12	TSS1500	shore	0.363371
chr17	6898821	6898821	R	cg05284666	ALOX12	TSS1500	island	0.425243
chr17	6925228	6925228	F	cg01570459	BCL6B	TSS1500	shore	0.30397
chr17	19290755	19290755	F	cg15119221	MFAP4	TSS1500	opensea	-0.346439
chr17	19290762	19290762	F	cg20431135	MFAP4	TSS1500	opensea	-0.326808
chr17	19771548	19771548	F	cg12324629	ULK2	TSS1500	shore	0.358734
chr17	19771612	19771612	F	cg17665699	ULK2	TSS1500	island	0.417204
chr17	26221089	26221089	R	cg02502358	C17orf108	TSS1500	shore	-0.307698
chr17	26221167	26221167	R	cg25536787	C17orf108	TSS1500	shore	-0.302318
chr17	27403823	27403823	R	cg07010741	TIAF1	TSS1500	shelf	0.301156
chr17	27403888	27403888	F	cg13726166	TIAF1	TSS1500	shelf	0.333948
chr17	29886672	29886672	R	cg20286236	MIR193A	TSS1500	island	0.302011
chr17	33759929	33759929	R	cg11346248	SLFN12	TSS1500	opensea	0.414023
chr17	33759957	33759957	R	cg21697381	SLFN12	TSS1500	opensea	0.334495
chr17	33759965	33759965	F	cg19566405	SLFN12	TSS1500	opensea	0.35904
chr17	33760230	33760230	F	cg10431713	SLFN12	TSS1500	opensea	0.343351
chr17	33760249	33760249	F	cg20354552	SLFN12	TSS1500	opensea	0.385739
chr17	33760278	33760278	F	cg00492719	SLFN12	TSS1500	opensea	0.453763
chr17	33760293	33760293	R	cg08330690	SLFN12	TSS1500	opensea	0.382238
chr17	33760308	33760308	R	cg10514580	SLFN12	TSS1500	opensea	0.383016
chr17	33760419	33760419	R	cg18587557	SLFN12	TSS1500	opensea	0.320743
chr17	33760527	33760527	F	cg03237218	SLFN12	TSS1500	opensea	0.324541
chr17	33777219	33777219	R	cg00364956	SLFN13	TSS1500	shore	0.311301
chr17	36105335	36105335	R	cg12788467	HNF1B	TSS1500	island	0.546522
chr17	36105337	36105337	R	cg13230606	HNF1B	TSS1500	island	0.557422
chr17	36105364	36105364	F	cg19378036	HNF1B	TSS1500	island	0.46473
chr17	36105517	36105517	R	cg14487292	HNF1B	TSS1500	island	0.512348
chr17	36106025	36106025	R	cg04198914	HNF1B	TSS1500	shore	0.446964
chr17	36106301	36106301	F	cg04105270	HNF1B	TSS1500	shore	0.489985
chr17	37845059	37845059	R	cg26110224	PGAP3	TSS1500	shore	0.411843
chr17	38211138	38211138	R	cg12364550	MED24	TSS1500	shore	0.332046
chr17	39297098	39297098	R	cg11603107	KRTAP4-6	TSS1500	opensea	-0.385424
chr17	39867146	39867146	R	cg21387325	GAST	TSS1500	opensea	-0.421173
chr17	41739760	41739760	F	cg09991763	MEOX1	TSS1500	opensea	-0.422175
chr17	42975879	42975879	F	cg18375700	CCDC103	TSS1500	shore	-0.318665
chr17	46799640	46799640	F	cg12374721	C17orf93	TSS1500	shore	0.309939
chr17	48250645	48250645	R	cg27224791	HILS1	TSS1500	opensea	-0.354314
chr17	48945892	48945892	F	cg15978558	TOB1	TSS1500	shore	0.350349
chr17	58499300	58499300	F	cg12788108	C17orf64	TSS1500	island	0.356249
chr17	61524292	61524292	F	cg13118906	CYB561	TSS1500	island	0.34121
chr17	61524304	61524304	F	cg14204735	CYB561	TSS1500	island	0.348051
chr17	68071012	68071012	R	cg23651088	KCNJ16	TSS1500	opensea	0.329488
chr17	74641167	74641167	F	cg13049471	ST6GALNAC1	TSS1500	opensea	0.392329
chr17	74641236	74641236	R	cg01686178	ST6GALNAC1	TSS1500	opensea	0.45191
chr17	74641275	74641275	F	cg00898480	ST6GALNAC1	TSS1500	opensea	0.408781
chr17	74641294	74641294	F	cg03096803	ST6GALNAC1	TSS1500	opensea	0.34982
chr17	79652024	79652024	R	cg16549644	ARL16	TSS1500	shore	-0.396197
chr17	80023921	80023921	R	cg10801102	DUS1L	TSS1500	island	0.355419
chr18	712894	712894	R	cg07532725	ENOSF1	TSS1500	island	0.309563
chr18	8608634	8608634	R	cg16735685	RAB12	TSS1500	shore	0.426541
chr18	8608738	8608738	F	cg21156812	RAB12	TSS1500	shore	0.379174
chr18	8608907	8608907	R	cg12615761	RAB12	TSS1500	island	0.348449
chr18	12307630	12307630	F	cg07307078	TUBB6	TSS1500	island	0.387838
chr18	12307649	12307649	F	cg03507241	TUBB6	TSS1500	island	0.397144
chr18	31021533	31021533	R	cg03459115	CCDC178	TSS1500	shore	0.389346
chr18	37255393	37255393	F	cg27422060	MIR5583-1	TSS1500	opensea	-0.317198
chr18	40696164	40696164	F	cg16036046	RIT2	TSS1500	opensea	-0.308979
chr18	47900124	47900124	R	cg26465327	SKA1	TSS1500	shore	0.374738
chr18	47901096	47901096	R	cg19246089	SKA1	TSS1500	shore	0.307451
chr18	53090572	53090572	R	cg00942007	TCF4	TSS1500	opensea	-0.370667
chr18	53090620	53090620	R	cg10557015	TCF4	TSS1500	opensea	-0.378321
chr18	55289797	55289797	F	cg21911276	NARS	TSS1500	shore	0.374822
chr18	55289825	55289825	F	cg08648241	NARS	TSS1500	shore	0.303436
chr18	57566313	57566313	F	cg14685305	PMAIP1	TSS1500	shore	0.32542
chr18	57566460	57566460	R	cg05157251	PMAIP1	TSS1500	shore	0.373281
chr18	59992157	59992157	R	cg11966450	TNFRSF11A	TSS1500	island	0.451332
chr18	66381343	66381343	R	cg06923616	CCDC102B	TSS1500	shore	-0.328773
chr18	74535634	74535634	F	cg22442168	ZNF236	TSS1500	island	0.379672
chr18	74535840	74535840	F	cg20234007	ZNF236	TSS1500	island	0.364711
chr19	345312	345312	R	cg08617160	MIER2	TSS1500	island	0.316929
chr19	1406618	1406618	F	cg14884899	DAZAP1	TSS1500	shore	0.331123
chr19	4535582	4535582	R	cg02593507	PLIN5	TSS1500	shore	-0.309337
chr19	6463949	6463949	F	cg03258472	CRB3	TSS1500	shore	0.300491
chr19	6464013	6464013	F	cg11715228	CRB3	TSS1500	island	0.317018
chr19	6464029	6464029	F	cg05384271	CRB3	TSS1500	island	0.347141
chr19	7695641	7695641	R	cg03613353	XAB2	TSS1500	shore	-0.299376
chr19	7741602	7741602	R	cg18732541	C19orf59	TSS1500	shelf	-0.307327
chr19	7741732	7741732	R	cg07723365	C19orf59	TSS1500	shelf	-0.387097
chr19	10047924	10047924	F	cg00208967	OLFM2	TSS1500	shore	0.343708
chr19	10213639	10213639	F	cg06789670	ANGPTL6	TSS1500	shelf	-0.301629
chr19	10712866	10712866	F	cg19392998	SLC44A2	TSS1500	shore	0.3064
chr19	11484752	11484752	F	cg23141934	SWSAP1	TSS1500	shore	-0.486778
chr19	11484815	11484815	F	cg05202804	C19orf39	TSS1500	shore	-0.436391
chr19	11484842	11484842	F	cg26495839	C19orf39	TSS1500	shore	-0.404819
chr19	11484869	11484869	F	cg11995437	C19orf39	TSS1500	shore	-0.515558
chr19	11689715	11689715	F	cg04566159	ACP5	TSS1500	island	0.315276
chr19	11689726	11689726	F	cg00487737	ACP5	TSS1500	island	0.330394
chr19	11689813	11689813	F	cg01602621	ACP5	TSS1500	shore	0.379545
chr19	11784344	11784344	R	cg00777011	ZNF833	TSS1500	shore	0.431083
chr19	11784514	11784514	F	cg04598224	ZNF833	TSS1500	shore	0.454882
chr19	12175268	12175268	F	cg11915001	ZNF844	TSS1500	shore	0.341399
chr19	14543048	14543048	F	cg25658463	PKN1	TSS1500	island	0.385391
chr19	15344186	15344186	F	cg21595709	EPHX3	TSS1500	island	0.388284
chr19	15344239	15344239	R	cg24745495	EPHX3	TSS1500	island	0.408944
chr19	15344265	15344265	F	cg24520342	EPHX3	TSS1500	island	0.337868
chr19	15344364	15344364	R	cg18366919	EPHX3	TSS1500	island	0.385301
chr19	15919767	15919767	F	cg13089041	OR10H1	TSS1500	shore	-0.375528
chr19	19495540	19495540	F	cg02887458	GATAD2A	TSS1500	shore	0.327997
chr19	20276916	20276916	R	cg03126199	ZNF486	TSS1500	opensea	0.345027
chr19	22968418	22968418	F	cg11625060	ZNF99	TSS1500	opensea	-0.305281
chr19	33361043	33361043	R	cg21827892	SLC7A9	TSS1500	opensea	0.329421
chr19	33361127	33361127	R	cg16861209	SLC7A9	TSS1500	opensea	0.344947
chr19	39467435	39467435	F	cg08844745	FBXO17	TSS1500	shore	0.310659
chr19	39970265	39970265	R	cg19019528	TIMM50	TSS1500	shore	0.364512
chr19	40092811	40092811	R	cg00196971	LGALS13	TSS1500	opensea	-0.368386
chr19	41731683	41731683	R	cg07493436	AXL	TSS1500	shore	-0.333088
chr19	41882069	41882069	F	cg02794151	TMEM91	TSS1500	shore	0.306088
chr19	42134128	42134128	R	cg21049958	CEACAM4	TSS1500	opensea	-0.35047
chr19	45842550	45842550	R	cg05462725	KLC3	TSS1500	shore	-0.318211
chr19	46088885	46088885	R	cg02408952	OPA3	TSS1500	shore	-0.313738
chr19	46732314	46732314	F	cg14631701	IGFL1	TSS1500	opensea	-0.307227
chr19	50193021	50193021	R	cg14440600	CPT1C	TSS1500	island	0.327822
chr19	50193437	50193437	F	cg00449201	CPT1C	TSS1500	island	0.347914
chr19	51487380	51487380	F	cg13096980	KLK7	TSS1500	opensea	0.306329
chr19	52134227	52134227	R	cg13503915	SIGLEC5	TSS1500	opensea	-0.30271
chr19	52391789	52391789	F	cg25361850	ZNF577	TSS1500	shore	0.316397
chr19	52408518	52408518	F	cg24576172	ZNF649	TSS1500	opensea	0.316575
chr19	54204562	54204562	F	cg11251554	MIR518B	TSS1500	opensea	-0.313659
chr19	54926263	54926263	R	cg16453065	TTYH1	TSS1500	shore	-0.312581
chr19	55128350	55128350	F	cg05365532	LILRB1	TSS1500	opensea	-0.344408
chr19	55218117	55218117	F	cg16012769	LILRP2	TSS1500	opensea	-0.307703
chr19	55630001	55630001	F	cg22372930	PPP1R12C	TSS1500	shore	0.446341
chr19	55630336	55630336	F	cg09533178	PPP1R12C	TSS1500	shore	0.385611
chr19	56250127	56250127	R	cg12280113	NLRP9	TSS1500	opensea	-0.299917
chr19	56348383	56348383	R	cg15304800	NLRP11	TSS1500	opensea	-0.346825
chr19	58220818	58220818	F	cg01268824	ZNF154	TSS1500	shore	0.451865
chr19	58662595	58662595	R	cg10210624	ZNF329	TSS1500	shore	0.344692
chr19	58662708	58662708	F	cg14853367	ZNF329	TSS1500	shore	0.330083
chr2	9613852	9613852	F	cg21471272	IAH1	TSS1500	shore	0.3174
chr2	15731278	15731278	R	cg02256644	DDX1	TSS1500	shore	-0.31017
chr2	26205865	26205865	F	cg07751331	KIF3C	TSS1500	shore	0.302678
chr2	26205876	26205876	F	cg21187770	KIF3C	TSS1500	shore	0.321225
chr2	32390099	32390099	R	cg20855242	SLC30A6	TSS1500	shore	0.312709
chr2	42396170	42396170	F	cg01184449	EML4	TSS1500	shore	0.307064
chr2	48755777	48755777	R	cg24908617	STON1-GTF2A1L	TSS1500	shore	0.373574
chr2	56410087	56410087	R	cg03028337	CCDC85A	TSS1500	shore	0.335989
chr2	62900278	62900278	F	cg18623658	EHBP1	TSS1500	opensea	0.356564
chr2	67131360	67131360	R	cg23957207	LOC101060019	TSS1500	opensea	0.350546
chr2	70313163	70313163	R	cg08479476	PCBP1	TSS1500	shore	0.396706
chr2	70313295	70313295	R	cg26487157	PCBP1	TSS1500	island	0.332031
chr2	71126275	71126275	F	cg23271234	VAX2	TSS1500	shore	0.358879
chr2	74875387	74875387	F	cg02611848	C2orf65	TSS1500	island	0.430361
chr2	74875399	74875399	F	cg04066351	M1AP	TSS1500	island	0.400572
chr2	74875561	74875561	R	cg22524327	M1AP	TSS1500	island	0.359975
chr2	86791105	86791105	F	cg05580277	VPS24	TSS1500	shore	-0.309585
chr2	87036626	87036626	R	cg12606911	CD8A	TSS1500	island	0.304812
chr2	87036948	87036948	F	cg06804210	CD8A	TSS1500	island	0.312807
chr2	95826087	95826087	F	cg18793806	ZNF514	TSS1500	shore	0.34127
chr2	106755680	106755680	R	cg02078001	UXS1	TSS1500	opensea	0.33247
chr2	113762746	113762746	R	cg16231198	IL36A	TSS1500	opensea	-0.336817
chr2	114515385	114515385	R	cg08702052	SLC35F5	TSS1500	shore	-0.313171
chr2	119698352	119698352	F	cg09601514	MARCO	TSS1500	opensea	-0.314556
chr2	131673771	131673771	R	cg09015973	ARHGEF4	TSS1500	island	0.363779
chr2	138721433	138721433	R	cg05407171	HNMT	TSS1500	opensea	0.369657
chr2	138721454	138721454	R	cg11081049	HNMT	TSS1500	opensea	0.357298
chr2	142890541	142890541	R	cg17413870	LRP1B	TSS1500	shore	-0.366488
chr2	143634304	143634304	R	cg10554510	KYNU	TSS1500	opensea	-0.301816
chr2	154336306	154336306	R	cg22392178	RPRM	TSS1500	shore	-0.33831
chr2	155314687	155314687	R	cg07645590	LOC100144595	TSS1500	opensea	-0.322933
chr2	160761622	160761622	R	cg15026998	LY75	TSS1500	shore	0.303483
chr2	163009075	163009075	F	cg21671120	GCG	TSS1500	opensea	-0.32849
chr2	163009282	163009282	F	cg21505217	GCG	TSS1500	opensea	-0.313596
chr2	163100992	163100992	R	cg17820085	FAP	TSS1500	opensea	-0.355812
chr2	163199399	163199399	R	cg09278322	GCA	TSS1500	shore	-0.301694
chr2	167006051	167006051	F	cg02419922	SCN1A	TSS1500	opensea	-0.342767
chr2	167006234	167006234	F	cg01638243	SCN1A	TSS1500	opensea	-0.301161
chr2	170654835	170654835	F	cg23497644	SSB	TSS1500	shore	-0.339601
chr2	196521354	196521354	F	cg10625666	SLC39A10	TSS1500	shore	0.307905
chr2	207307150	207307150	F	cg24399540	ADAM23	TSS1500	shore	-0.374336
chr2	208635637	208635637	F	cg05365735	FZD5	TSS1500	shore	0.409168
chr2	223164867	223164867	F	cg18077971	PAX3	TSS1500	shore	0.320909
chr2	223164869	223164869	F	cg19352038	PAX3	TSS1500	shore	0.325259
chr2	226264545	226264545	F	cg25299371	KIAA1486	TSS1500	opensea	-0.321475
chr2	234159882	234159882	R	cg23339656	ATG16L1	TSS1500	shore	-0.307649
chr2	239755896	239755896	R	cg13518883	TWIST2	TSS1500	island	0.303527
chr2	241807859	241807859	F	cg16967583	AGXT	TSS1500	opensea	-0.361716
chr20	1612808	1612808	F	cg00232772	SIRPG-AS1	TSS1500	opensea	-0.297844
chr20	3663068	3663068	R	cg03876116	ADAM33	TSS1500	island	0.361072
chr20	17663647	17663647	R	cg26447697	RRBP1	TSS1500	shore	0.301466
chr20	17663972	17663972	R	cg07597892	RRBP1	TSS1500	shore	0.384839
chr20	24929607	24929607	R	cg26450106	CST7	TSS1500	opensea	-0.320908
chr20	29979846	29979846	F	cg06372145	DEFB119	TSS1500	opensea	-0.42831
chr20	30639305	30639305	F	cg17508991	HCK	TSS1500	shore	0.455084
chr20	30639705	30639705	R	cg17326769	HCK	TSS1500	shore	0.513734
chr20	30639816	30639816	F	cg02311725	HCK	TSS1500	shore	0.342206
chr20	33422627	33422627	F	cg16321524	HMGB3L1	TSS1500	opensea	-0.298337
chr20	35972070	35972070	R	cg17027626	SRC	TSS1500	shelf	0.324359
chr20	35973064	35973064	F	cg19757422	SRC	TSS1500	shore	0.31291
chr20	42187103	42187103	R	cg04420889	SGK2	TSS1500	opensea	0.309209
chr20	44881449	44881449	R	cg11152825	CDH22	TSS1500	shore	-0.361088
chr20	45986186	45986186	F	cg11315935	ZMYND8	TSS1500	opensea	0.306992
chr20	45986862	45986862	R	cg02807220	ZMYND8	TSS1500	opensea	0.361624
chr20	45987046	45987046	R	cg05573855	ZMYND8	TSS1500	opensea	0.300279
chr20	56883965	56883965	F	cg10927178	RAB22A	TSS1500	shore	0.3012
chr20	57090236	57090236	F	cg24459951	APCDD1L	TSS1500	island	0.332055
chr20	57090315	57090315	R	cg14546153	APCDD1L	TSS1500	shore	0.316719
chr20	57090317	57090317	F	cg23418591	APCDD1L	TSS1500	shore	0.326864
chr20	60877067	60877067	F	cg11176186	ADRM1	TSS1500	shore	0.30616
chr20	61002857	61002857	R	cg17976205	C20orf151	TSS1500	opensea	0.299603
chr20	62795464	62795464	F	cg15698171	MYT1	TSS1500	opensea	-0.310287
chr21	15580060	15580060	F	cg16863163	LIPI	TSS1500	opensea	-0.304565
chr21	19776616	19776616	F	cg20839025	TMPRSS15	TSS1500	opensea	-0.351707
chr21	24757997	24757997	R	cg03720510	D21S2088E	TSS1500	opensea	-0.377034
chr21	24758358	24758358	R	cg24985874	D21S2088E	TSS1500	opensea	-0.448504
chr21	25695067	25695067	R	cg25232018	LOC101927869	TSS1500	opensea	-0.380743
chr21	31915100	31915100	R	cg05079470	KRTAP19-6	TSS1500	opensea	-0.336844
chr21	37092770	37092770	F	cg01027226	MIR802	TSS1500	opensea	-0.317468
chr21	38378346	38378346	F	cg24726200	RIPPLY3	TSS1500	island	0.332608
chr21	38378406	38378406	F	cg16345647	DSCR6	TSS1500	island	0.425036
chr21	38378433	38378433	R	cg09849302	RIPPLY3	TSS1500	island	0.383759
chr21	38378539	38378539	R	cg04965987	DSCR6	TSS1500	island	0.349762
chr21	38378634	38378634	F	cg16886987	DSCR6	TSS1500	island	0.355049
chr21	42880554	42880554	R	cg24901042	TMPRSS2	TSS1500	island	0.315216
chr21	42880557	42880557	R	cg26309194	TMPRSS2	TSS1500	island	0.305536
chr22	21921743	21921743	F	cg26067319	UBE2L3	TSS1500	shore	-0.308458
chr22	24891129	24891129	R	cg09246479	C22orf45	TSS1500	island	0.307755
chr22	30476089	30476089	F	cg21890667	HORMAD2	TSS1500	island	0.412174
chr22	30476098	30476098	F	cg16686158	HORMAD2	TSS1500	island	0.41275
chr22	30476204	30476204	R	cg08321518	HORMAD2	TSS1500	island	0.446311
chr22	30476206	30476206	R	cg04046669	HORMAD2	TSS1500	island	0.456762
chr22	31001766	31001766	R	cg11874247	TCN2	TSS1500	opensea	0.325753
chr22	31364302	31364302	R	cg05373339	TUG1	TSS1500	shore	0.307134
chr22	37977445	37977445	R	cg19360907	LGALS2	TSS1500	opensea	-0.335183
chr22	41600182	41600182	F	cg15051882	L3MBTL2	TSS1500	shore	-0.327007
chr22	46545351	46545351	R	cg24907233	PPARA	TSS1500	shore	0.30091
chr22	50524374	50524374	F	cg07310406	MLC1	TSS1500	shelf	-0.347851
chr22	50524410	50524410	F	cg07863159	MLC1	TSS1500	shelf	-0.392934
chr22	50623687	50623687	F	cg05297854	TRABD	TSS1500	island	0.363839
chr22	50623692	50623692	F	cg11213574	TRABD	TSS1500	island	0.34616
chr3	8542475	8542475	F	cg10532246	LMCD1	TSS1500	shore	0.338121
chr3	9988662	9988662	R	cg16533830	PRRT3-AS1	TSS1500	island	0.382472
chr3	10206254	10206254	F	cg04733838	IRAK2	TSS1500	shore	-0.345492
chr3	11625160	11625160	F	cg20287910	VGLL4	TSS1500	opensea	-0.305726
chr3	12328729	12328729	R	cg19182242	PPARG	TSS1500	shore	0.3063
chr3	12328740	12328740	F	cg18063278	PPARG	TSS1500	shore	0.400069
chr3	33260934	33260934	F	cg03497399	SUSD5	TSS1500	shore	0.322493
chr3	33261112	33261112	F	cg25693769	SUSD5	TSS1500	shore	0.317309
chr3	38836991	38836991	F	cg08019151	SCN10A	TSS1500	opensea	-0.306851
chr3	40428506	40428506	R	cg14818391	ENTPD3	TSS1500	shore	0.309592
chr3	42846907	42846907	R	cg01996116	HIGD1A	TSS1500	shore	0.422348
chr3	42847044	42847044	R	cg01293485	HIGD1A	TSS1500	shore	0.364534
chr3	42847116	42847116	F	cg14508777	HIGD1A	TSS1500	shore	0.319824
chr3	42918546	42918546	R	cg09430445	CYP8B1	TSS1500	shelf	0.378385
chr3	42918681	42918681	F	cg26124860	CYP8B1	TSS1500	shelf	0.365081
chr3	42918786	42918786	F	cg09767885	CYP8B1	TSS1500	shelf	0.336709
chr3	42918806	42918806	R	cg07147573	CYP8B1	TSS1500	shelf	0.380497
chr3	46917917	46917917	F	cg26521107	PTH1R	TSS1500	opensea	0.341073
chr3	46918356	46918356	R	cg06042608	PTH1R	TSS1500	opensea	0.299704
chr3	46918866	46918866	R	cg25824816	PTH1R	TSS1500	opensea	0.319925
chr3	48282209	48282209	R	cg02219026	ZNF589	TSS1500	shore	0.370488
chr3	50341283	50341283	R	cg03223057	HYAL1	TSS1500	opensea	0.335683
chr3	50341293	50341293	R	cg12930727	HYAL1	TSS1500	opensea	0.464343
chr3	50341369	50341369	R	cg11945644	HYAL1	TSS1500	opensea	0.413304
chr3	51894883	51894883	R	cg14444993	IQCF2	TSS1500	opensea	-0.342218
chr3	52231311	52231311	F	cg12396051	ALAS1	TSS1500	shore	0.333221
chr3	56951917	56951917	F	cg01602822	ARHGEF3	TSS1500	opensea	-0.312064
chr3	71592297	71592297	F	cg15226786	MIR1284	TSS1500	opensea	-0.34793
chr3	81811322	81811322	R	cg11625933	GBE1	TSS1500	shore	0.321127
chr3	81811448	81811448	R	cg21897315	GBE1	TSS1500	shore	0.337123
chr3	95402637	95402637	R	cg25647648	MTHFD2P1	TSS1500	opensea	-0.319679
chr3	97755601	97755601	F	cg19517931	GABRR3	TSS1500	opensea	-0.326665
chr3	97805540	97805540	R	cg17111938	OR5AC2	TSS1500	opensea	-0.308366
chr3	97982431	97982431	R	cg18335663	OR5H6	TSS1500	opensea	-0.385735
chr3	98000604	98000604	R	cg25764110	OR5H2	TSS1500	opensea	-0.338622
chr3	107810507	107810507	R	cg25881170	CD47	TSS1500	island	0.31758
chr3	107810678	107810678	F	cg11741004	CD47	TSS1500	shore	0.37253
chr3	107810687	107810687	F	cg02487233	CD47	TSS1500	shore	0.400944
chr3	108540583	108540583	F	cg25049850	TRAT1	TSS1500	opensea	-0.309489
chr3	111451090	111451090	F	cg22874988	PHLDB2	TSS1500	opensea	0.405519
chr3	112887453	112887453	F	cg18270463	LOC101929717	TSS1500	opensea	-0.363559
chr3	112887464	112887464	F	cg14159042	LOC101929717	TSS1500	opensea	-0.352112
chr3	130466871	130466871	F	cg01571722	PIK3R4	TSS1500	shore	0.31385
chr3	131758836	131758836	F	cg16578613	CPNE4	TSS1500	opensea	-0.307424
chr3	134094802	134094802	F	cg26451824	AMOTL2	TSS1500	shore	0.317843
chr3	134094924	134094924	F	cg23293923	AMOTL2	TSS1500	shore	0.335478
chr3	139259742	139259742	R	cg06726820	RBP1	TSS1500	shore	-0.363728
chr3	147125712	147125712	F	cg23189410	ZIC4	TSS1500	shore	0.398162
chr3	147125714	147125714	F	cg17546247	ZIC4	TSS1500	shore	0.323783
chr3	149530095	149530095	F	cg27304177	RNF13	TSS1500	shore	0.348845
chr3	149530133	149530133	F	cg15108553	RNF13	TSS1500	shore	0.341685
chr3	154148424	154148424	F	cg05248386	GPR149	TSS1500	shore	-0.316326
chr3	157260593	157260593	R	cg02298721	PQLC2L	TSS1500	shore	0.396023
chr3	157260627	157260627	R	cg08504812	C3orf55	TSS1500	shore	0.331868
chr3	157260764	157260764	F	cg04682135	C3orf55	TSS1500	island	0.300949
chr3	157260788	157260788	F	cg00301159	C3orf55	TSS1500	island	0.335493
chr3	160168238	160168238	F	cg07572451	TRIM59	TSS1500	shore	0.340161
chr3	169538417	169538417	F	cg21634555	LRRIQ4	TSS1500	opensea	-0.308314
chr3	170137683	170137683	R	cg07126617	CLDN11	TSS1500	island	0.349581
chr3	170626822	170626822	R	cg16450309	EIF5A2	TSS1500	island	0.37917
chr3	172467177	172467177	F	cg27119936	ECT2	TSS1500	shore	0.469827
chr3	172467274	172467274	R	cg25357598	ECT2	TSS1500	shore	0.457253
chr3	174576186	174576186	F	cg01967317	NAALADL2	TSS1500	opensea	0.323449
chr3	186503643	186503643	F	cg24082174	SNORA63	TSS1500	shore	-0.328399
chr3	193924383	193924383	F	cg04836354	LOC100505920	TSS1500	shore	-0.308141
chr3	193924501	193924501	R	cg12281219	LOC100505920	TSS1500	shelf	-0.314456
chr3	195623347	195623347	F	cg21642245	TNK2	TSS1500	shore	-0.314088
chr3	195623768	195623768	F	cg06084610	TNK2	TSS1500	shore	-0.32194
chr3	195623792	195623792	F	cg23548201	TNK2	TSS1500	shore	-0.337415
chr4	1203049	1203049	F	cg14066993	LOC100130872	TSS1500	island	-0.320057
chr4	4386738	4386738	F	cg19675256	NSG1	TSS1500	shore	0.415249
chr4	4386745	4386745	F	cg05274323	D4S234E	TSS1500	shore	0.370595
chr4	8443412	8443412	F	cg06768993	ACOX3	TSS1500	shore	-0.311396
chr4	14890486	14890486	R	cg11297341	LINC00504	TSS1500	opensea	-0.301631
chr4	27217668	27217668	R	cg27198039	LOC101929199	TSS1500	opensea	-0.307005
chr4	40336255	40336255	R	cg26531231	CHRNA9	TSS1500	opensea	-0.360497
chr4	40518663	40518663	F	cg06332621	RBM47	TSS1500	opensea	0.312706
chr4	56814150	56814150	F	cg12729253	CEP135	TSS1500	shore	-0.345519
chr4	57035948	57035948	F	cg25769043	KIAA1211	TSS1500	opensea	0.337373
chr4	57035957	57035957	F	cg24814707	KIAA1211	TSS1500	opensea	0.349476
chr4	76440699	76440699	R	cg14178991	RCHY1	TSS1500	shore	-0.341404
chr4	76440715	76440715	F	cg18508824	RCHY1	TSS1500	shore	-0.412988
chr4	89512588	89512588	F	cg07547492	HERC3	TSS1500	shore	0.399356
chr4	108745279	108745279	R	cg02726377	SGMS2	TSS1500	shore	0.346215
chr4	123543092	123543092	R	cg14948552	IL21	TSS1500	opensea	-0.350597
chr4	164535643	164535643	R	cg02158542	MARCH1	TSS1500	opensea	-0.330295
chr4	165119222	165119222	F	cg27475349	ANP32C	TSS1500	opensea	-0.327802
chr4	169752455	169752455	F	cg04606771	PALLD	TSS1500	shore	-0.419512
chr4	185727207	185727207	R	cg01154380	ACSL1	TSS1500	shelf	0.324861
chr4	187069667	187069667	F	cg24381339	FAM149A	TSS1500	shelf	0.393916
chr4	188916581	188916581	R	cg15718581	ZFP42	TSS1500	shore	0.45317
chr4	188916668	188916668	R	cg17214381	ZFP42	TSS1500	island	0.35354
chr4	188916709	188916709	R	cg00663077	ZFP42	TSS1500	island	0.362694
chr5	1295737	1295737	F	cg11625005	TERT	TSS1500	island	0.326263
chr5	1446208	1446208	F	cg14502484	SLC6A3	TSS1500	island	0.364019
chr5	1446443	1446443	R	cg13202751	SLC6A3	TSS1500	island	0.363072
chr5	1800542	1800542	R	cg15095922	NDUFS6	TSS1500	island	0.434137
chr5	1800606	1800606	F	cg12287936	NDUFS6	TSS1500	island	0.614627
chr5	1800684	1800684	R	cg20742562	NDUFS6	TSS1500	island	0.45113
chr5	1800782	1800782	F	cg03243450	NDUFS6	TSS1500	island	0.528198
chr5	1800961	1800961	F	cg24827258	NDUFS6	TSS1500	island	0.560223
chr5	29143190	29143190	R	cg14157326	LOC101929660	TSS1500	opensea	-0.378595
chr5	34043724	34043724	R	cg24699745	C1QTNF3	TSS1500	opensea	-0.299874
chr5	54397821	54397821	F	cg13566919	GZMA	TSS1500	opensea	-0.382917
chr5	54397868	54397868	R	cg19343233	GZMA	TSS1500	opensea	-0.357427
chr5	72415900	72415900	R	cg14744898	TMEM171	TSS1500	island	0.399268
chr5	72415998	72415998	F	cg10795659	TMEM171	TSS1500	island	0.41368
chr5	72416000	72416000	F	cg18800060	TMEM171	TSS1500	island	0.401743
chr5	72416082	72416082	R	cg15480817	TMEM171	TSS1500	island	0.41911
chr5	72416182	72416182	R	cg25731807	TMEM171	TSS1500	island	0.359056
chr5	75013592	75013592	R	cg06430061	C5orf37	TSS1500	shore	-0.38045
chr5	78365830	78365830	R	cg26759351	DMGDH	TSS1500	shore	0.342373
chr5	90610422	90610422	F	cg13782035	LUCAT1	TSS1500	opensea	-0.32062
chr5	100240223	100240223	R	cg26872028	ST8SIA4	TSS1500	shore	0.304766
chr5	112825132	112825132	F	cg13531667	MCC	TSS1500	shore	-0.418094
chr5	132209089	132209089	R	cg12607188	LEAP2	TSS1500	opensea	0.39579
chr5	132209139	132209139	F	cg02081065	LEAP2	TSS1500	opensea	0.411679
chr5	134735362	134735362	F	cg20973207	H2AFY	TSS1500	shore	0.345176
chr5	134735478	134735478	F	cg08158049	H2AFY	TSS1500	shore	0.403582
chr5	134735613	134735613	R	cg18394340	H2AFY	TSS1500	shore	0.39385
chr5	134735637	134735637	F	cg15613420	H2AFY	TSS1500	shore	0.392207
chr5	134735654	134735654	F	cg24628744	H2AFY	TSS1500	shore	0.412804
chr5	134735914	134735914	F	cg26214742	H2AFY	TSS1500	shore	0.399103
chr5	138862469	138862469	R	cg12116266	TMEM173	TSS1500	opensea	-0.336534
chr5	140180255	140180255	F	cg21768610	PCDHA3	TSS1500	shore	0.405113
chr5	140201143	140201143	R	cg02961654	PCDHA5	TSS1500	shore	0.412165
chr5	140213621	140213621	R	cg26247335	PCDHA7	TSS1500	shore	0.339468
chr5	140219730	140219730	F	cg14215392	PCDHA8	TSS1500	shore	0.345609
chr5	140254527	140254527	F	cg02090731	PCDHA12	TSS1500	shore	0.386138
chr5	140479025	140479025	R	cg23918315	PCDHB3	TSS1500	shelf	0.316423
chr5	140479979	140479979	F	cg18782991	PCDHB3	TSS1500	shore	0.312494
chr5	140479983	140479983	F	cg02125910	PCDHB3	TSS1500	shore	0.357505
chr5	140501321	140501321	F	cg24918705	PCDHB4	TSS1500	shore	0.345862
chr5	140501365	140501365	R	cg24818200	PCDHB4	TSS1500	shore	0.334848
chr5	140566664	140566664	F	cg25360147	PCDHB9	TSS1500	shore	0.368724
chr5	140579119	140579119	R	cg20214105	PCDHB11	TSS1500	shore	0.305607
chr5	140602851	140602851	F	cg12396306	PCDHB14	TSS1500	shore	0.315123
chr5	140619446	140619446	F	cg19727801	PCDHB19P	TSS1500	shore	0.448877
chr5	140624869	140624869	F	cg03572772	PCDHB15	TSS1500	shore	0.341116
chr5	140624874	140624874	F	cg17023770	PCDHB15	TSS1500	shore	0.387609
chr5	140624888	140624888	F	cg22732749	PCDHB15	TSS1500	shore	0.415052
chr5	140723350	140723350	F	cg15314696	PCDHGA3	TSS1500	shore	0.372649
chr5	140743165	140743165	F	cg00882725	PCDHGA5	TSS1500	shore	0.341534
chr5	140743575	140743575	R	cg07520649	PCDHGA5	TSS1500	shore	0.393525
chr5	140753387	140753387	F	cg01357507	PCDHGA6	TSS1500	shore	0.322453
chr5	140761973	140761973	F	cg05516386	PCDHGA7	TSS1500	shore	0.344496
chr5	140782277	140782277	F	cg07642801	PCDHGA9	TSS1500	shelf	0.425178
chr5	140792514	140792514	R	cg10029377	PCDHGA10	TSS1500	shore	0.416051
chr5	140792540	140792540	F	cg01439264	PCDHGA10	TSS1500	shore	0.419526
chr5	150326521	150326521	F	cg04755771	LOC134466	TSS1500	shore	0.318002
chr5	151305746	151305746	R	cg02842704	GLRA1	TSS1500	shore	-0.381319
chr5	154091976	154091976	F	cg09088720	LARP1	TSS1500	opensea	0.482881
chr5	154092109	154092109	R	cg23613317	LARP1	TSS1500	opensea	0.385446
chr5	156486186	156486186	R	cg01485975	HAVCR1	TSS1500	opensea	0.37085
chr5	156486194	156486194	R	cg18103459	HAVCR1	TSS1500	opensea	0.313478
chr5	170813996	170813996	R	cg23573591	NPM1	TSS1500	shore	0.325877
chr5	172662741	172662741	R	cg03625415	NKX2-5	TSS1500	shore	0.329108
chr5	172663058	172663058	R	cg07383092	NKX2-5	TSS1500	shore	0.324608
chr5	173319028	173319028	F	cg05378303	CPEB4	TSS1500	shelf	0.370735
chr5	173319119	173319119	F	cg02966448	CPEB4	TSS1500	shelf	0.403079
chr5	173471726	173471726	F	cg09203631	HMP19	TSS1500	opensea	-0.330258
chr5	173472097	173472097	R	cg25494605	HMP19	TSS1500	opensea	-0.30576
chr6	24490221	24490221	F	cg15458313	GPLD1	TSS1500	opensea	-0.311522
chr6	25651724	25651724	F	cg02430368	SCGN	TSS1500	shore	-0.317804
chr6	26020251	26020251	F	cg18810712	HIST1H3A	TSS1500	shore	0.307424
chr6	27791239	27791239	F	cg09015797	HIST1H4J	TSS1500	shore	0.313619
chr6	29055577	29055577	R	cg10556798	OR2B3	TSS1500	opensea	-0.311475
chr6	29325277	29325277	R	cg20923461	OR5V1	TSS1500	opensea	-0.319457
chr6	29424788	29424788	R	cg20320604	OR2H1	TSS1500	opensea	-0.37812
chr6	29424926	29424926	R	cg03215160	OR2H1	TSS1500	opensea	-0.33073
chr6	30900299	30900299	R	cg25784359	SFTA2	TSS1500	opensea	0.325428
chr6	31146222	31146222	R	cg00184953	PSORS1C3	TSS1500	shelf	-0.344814
chr6	31516045	31516045	F	cg08596308	ATP6V1G2	TSS1500	opensea	-0.43973
chr6	31516059	31516059	F	cg21982924	ATP6V1G2	TSS1500	opensea	-0.34405
chr6	31707019	31707019	R	cg20640261	MSH5	TSS1500	shore	0.35643
chr6	31707301	31707301	R	cg18953509	MSH5	TSS1500	shore	0.309079
chr6	31938372	31938372	F	cg01449563	STK19	TSS1500	shore	-0.300075
chr6	31938984	31938984	R	cg23945481	STK19	TSS1500	shore	-0.355272
chr6	31939025	31939025	R	cg17339327	STK19	TSS1500	shore	-0.377491
chr6	31939085	31939085	R	cg26029547	STK19	TSS1500	shore	-0.34231
chr6	33256078	33256078	R	cg27355501	PFDN6	TSS1500	shore	-0.316616
chr6	33256216	33256216	R	cg17131579	PFDN6	TSS1500	shore	-0.320437
chr6	33256222	33256222	R	cg00870279	PFDN6	TSS1500	shore	-0.42127
chr6	34203564	34203564	F	cg00544436	HMGA1	TSS1500	island	0.407207
chr6	34203630	34203630	R	cg18696576	HMGA1	TSS1500	island	0.313941
chr6	34203887	34203887	F	cg03020951	HMGA1	TSS1500	island	0.381727
chr6	41008099	41008099	R	cg13898845	UNC5CL	TSS1500	opensea	0.300679
chr6	43483748	43483748	F	cg21958026	POLR1C	TSS1500	shore	-0.348359
chr6	47444224	47444224	F	cg23250715	CD2AP	TSS1500	shore	0.338944
chr6	49756399	49756399	R	cg06801948	PGK2	TSS1500	opensea	-0.324239
chr6	49845960	49845960	F	cg26067188	CRISP1	TSS1500	opensea	-0.361531
chr6	49933226	49933226	F	cg08707249	DEFB114	TSS1500	opensea	-0.337906
chr6	52050190	52050190	F	cg14139082	IL17A	TSS1500	opensea	-0.318526
chr6	55190909	55190909	R	cg11823729	GFRAL	TSS1500	opensea	-0.403383
chr6	55192049	55192049	F	cg23978358	GFRAL	TSS1500	opensea	-0.331927
chr6	68763982	68763982	F	cg08977725	LOC102723883	TSS1500	opensea	-0.379546
chr6	68764730	68764730	R	cg15156972	LOC102723883	TSS1500	opensea	-0.36663
chr6	69040558	69040558	F	cg13423100	LOC101928280	TSS1500	opensea	-0.300443
chr6	72114023	72114023	R	cg21303169	MIR30A	TSS1500	opensea	0.33678
chr6	78399752	78399752	F	cg21324045	MEI4	TSS1500	opensea	-0.415869
chr6	82524284	82524284	R	cg11642415	LINC01526	TSS1500	opensea	-0.335873
chr6	88494178	88494178	F	cg11678652	LOC101928911	TSS1500	opensea	0.429412
chr6	107235591	107235591	F	cg19843385	LOC100422737	TSS1500	opensea	0.347447
chr6	117802710	117802710	R	cg27642470	DCBLD1	TSS1500	shore	0.325822
chr6	117802725	117802725	F	cg11412288	DCBLD1	TSS1500	shore	0.374603
chr6	138821354	138821354	R	cg03735592	NHSL1	TSS1500	opensea	0.33505
chr6	150347012	150347012	R	cg09575280	RAET1L	TSS1500	opensea	0.302549
chr6	150347053	150347053	F	cg08119607	RAET1L	TSS1500	opensea	0.304682
chr6	154833245	154833245	F	cg14906165	CNKSR3	TSS1500	shore	0.367218
chr6	160769116	160769116	R	cg07883823	SLC22A3	TSS1500	island	0.351676
chr7	968237	968237	F	cg07496190	ADAP1	TSS1500	shore	-0.398248
chr7	1127175	1127175	R	cg03037850	GPER1	TSS1500	shore	0.351336
chr7	5085252	5085252	F	cg01530283	RBAK	TSS1500	shore	0.42114
chr7	7758995	7758995	R	cg26322315	RPA3	TSS1500	opensea	-0.319291
chr7	14031941	14031941	F	cg15256387	ETV1	TSS1500	shore	-0.301802
chr7	18534872	18534872	F	cg08285151	HDAC9	TSS1500	opensea	-0.305661
chr7	22765321	22765321	F	cg17067544	IL6	TSS1500	opensea	-0.346911
chr7	23511443	23511443	F	cg08939418	IGF2BP3	TSS1500	shore	-0.348218
chr7	24797680	24797680	F	cg25723149	DFNA5	TSS1500	shore	0.373178
chr7	24797691	24797691	F	cg22804000	DFNA5	TSS1500	shore	0.311683
chr7	27703802	27703802	R	cg14334382	HIBADH	TSS1500	shore	0.309303
chr7	44163975	44163975	F	cg04284140	POLD2	TSS1500	shore	0.427403
chr7	48127925	48127925	F	cg01092213	UPP1	TSS1500	shore	0.326525
chr7	48127997	48127997	R	cg02703728	UPP1	TSS1500	shore	0.399591
chr7	48128010	48128010	R	cg06130949	UPP1	TSS1500	shore	0.360631
chr7	48128047	48128047	R	cg16922808	UPP1	TSS1500	island	0.326241
chr7	56562731	56562731	F	cg16357179	DKFZp434L192	TSS1500	opensea	-0.30475
chr7	57207952	57207952	F	cg20306025	ZNF479	TSS1500	opensea	-0.319939
chr7	57508824	57508824	R	cg21588944	ZNF716	TSS1500	opensea	-0.303984
chr7	86271783	86271783	F	cg04946588	GRM3	TSS1500	opensea	-0.314559
chr7	87105416	87105416	F	cg25823085	ABCB4	TSS1500	shore	0.315826
chr7	87256748	87256748	F	cg12039935	RUNDC3B	TSS1500	shore	-0.311075
chr7	87342864	87342864	F	cg07872519	ABCB1	TSS1500	opensea	-0.308807
chr7	91510597	91510597	R	cg10872641	MTERF	TSS1500	shore	-0.319754
chr7	93114291	93114291	F	cg22669561	MIR489	TSS1500	opensea	-0.420629
chr7	93190336	93190336	R	cg01786985	CALCR	TSS1500	opensea	-0.325014
chr7	93549968	93549968	F	cg02914800	GNG11	TSS1500	opensea	0.348853
chr7	95025905	95025905	R	cg15927196	PON3	TSS1500	island	0.354916
chr7	95025924	95025924	F	cg15500865	PON3	TSS1500	island	0.425291
chr7	95026097	95026097	R	cg08898155	PON3	TSS1500	island	0.31022
chr7	99005134	99005134	F	cg10213821	BUD31	TSS1500	shore	-0.300808
chr7	102553045	102553045	R	cg08636620	LRRC17	TSS1500	opensea	-0.326392
chr7	107644570	107644570	R	cg12755815	LAMB1	TSS1500	shore	0.394613
chr7	108525503	108525503	R	cg01611504	C7orf66	TSS1500	opensea	-0.398347
chr7	114561988	114561988	R	cg10436410	MDFIC	TSS1500	shore	0.335803
chr7	117119424	117119424	F	cg26635219	CFTR	TSS1500	opensea	0.344754
chr7	123198384	123198384	R	cg10289901	NDUFA5	TSS1500	shore	-0.302521
chr7	123563814	123563814	F	cg14221865	SPAM1	TSS1500	opensea	-0.336477
chr7	127880932	127880932	F	cg12782180	LEP	TSS1500	island	0.371177
chr7	128502373	128502373	R	cg17360359	ATP6V1F	TSS1500	shore	0.309204
chr7	129984231	129984231	F	cg22864452	CPA5	TSS1500	opensea	0.321842
chr7	142981350	142981350	F	cg19085924	TMEM139	TSS1500	shelf	0.342729
chr7	151217883	151217883	R	cg21134096	RHEB	TSS1500	island	0.344919
chr7	151217947	151217947	R	cg24531520	RHEB	TSS1500	shore	0.304767
chr8	1992555	1992555	R	cg22843712	MYOM2	TSS1500	opensea	-0.302517
chr8	17753566	17753566	R	cg12806300	FGL1	TSS1500	opensea	0.299989
chr8	19170432	19170432	R	cg09140851	SH2D4A	TSS1500	shore	0.314284
chr8	22223985	22223985	R	cg25257677	SLC39A14	TSS1500	shore	0.381604
chr8	22224126	22224126	F	cg05487207	SLC39A14	TSS1500	shore	0.404985
chr8	22437249	22437249	R	cg00482804	PDLIM2	TSS1500	shore	0.308889
chr8	41167660	41167660	R	cg14904908	SFRP1	TSS1500	shore	0.308977
chr8	41167923	41167923	R	cg14824386	SFRP1	TSS1500	shore	0.447496
chr8	42066228	42066228	F	cg18899064	PLAT	TSS1500	opensea	-0.303604
chr8	43146388	43146388	R	cg01192262	POTEA	TSS1500	opensea	-0.360515
chr8	55527950	55527950	F	cg06704573	RP1	TSS1500	opensea	-0.301949
chr8	55528099	55528099	F	cg10780897	RP1	TSS1500	opensea	-0.363251
chr8	56791748	56791748	F	cg05997362	LYN	TSS1500	shore	0.305779
chr8	56791798	56791798	F	cg02410887	LYN	TSS1500	shore	0.313088
chr8	57309145	57309145	F	cg14220224	SDR16C6	TSS1500	opensea	-0.316846
chr8	60032983	60032983	R	cg07211044	TOX	TSS1500	shore	0.341097
chr8	62199082	62199082	F	cg03263337	CLVS1	TSS1500	opensea	-0.333602
chr8	65711644	65711644	R	cg00054210	CYP7B1	TSS1500	island	0.379263
chr8	65711658	65711658	R	cg01510388	CYP7B1	TSS1500	island	0.334362
chr8	76451386	76451386	F	cg13373342	HNF4G	TSS1500	opensea	-0.334386
chr8	80943347	80943347	R	cg02006107	MRPS28	TSS1500	shore	0.307869
chr8	96145483	96145483	F	cg16151082	PLEKHF2	TSS1500	shore	0.332946
chr8	103669614	103669614	R	cg08693224	KLF10	TSS1500	shore	-0.343158
chr8	110705213	110705213	R	cg08076877	SYBU	TSS1500	shore	-0.299969
chr8	114390744	114390744	F	cg27644795	CSMD3	TSS1500	opensea	-0.339123
chr8	120219927	120219927	F	cg02749784	MAL2	TSS1500	shore	-0.318884
chr8	120846352	120846352	R	cg21125452	TAF2	TSS1500	shore	0.339913
chr8	121458287	121458287	F	cg12994248	MRPL13	TSS1500	shore	-0.329586
chr8	125385995	125385995	R	cg01989084	TMEM65	TSS1500	shore	0.30173
chr8	131457058	131457058	F	cg16251054	ASAP1	TSS1500	shore	-0.348694
chr8	133072269	133072269	R	cg25626375	OC90	TSS1500	opensea	-0.334534
chr8	134310718	134310718	F	cg03728930	NDRG1	TSS1500	shore	0.349902
chr8	143961514	143961514	F	cg01942530	CYP11B1	TSS1500	opensea	-0.299978
chr9	1049244	1049244	R	cg00934355	DMRT2	TSS1500	shore	0.340175
chr9	6412392	6412392	R	cg20997662	UHRF2	TSS1500	island	0.357362
chr9	21218462	21218462	F	cg06479216	IFNA16	TSS1500	opensea	-0.299418
chr9	35161637	35161637	R	cg17476361	UNC13B	TSS1500	shore	0.388327
chr9	35161671	35161671	R	cg03918237	UNC13B	TSS1500	shore	0.364761
chr9	36036514	36036514	R	cg13392078	RECK	TSS1500	shore	0.365205
chr9	36135760	36135760	R	cg12707935	GLIPR2	TSS1500	shore	0.345061
chr9	36135812	36135812	R	cg14302936	GLIPR2	TSS1500	shore	0.364582
chr9	72435964	72435964	R	cg24567724	C9orf135-AS1	TSS1500	opensea	0.366723
chr9	73030253	73030253	F	cg09300217	KLF9	TSS1500	shore	0.384326
chr9	86571904	86571904	F	cg13912673	C9orf64	TSS1500	island	0.472267
chr9	86572023	86572023	R	cg06767295	C9orf64	TSS1500	island	0.459918
chr9	86572245	86572245	R	cg02459086	C9orf64	TSS1500	shore	0.444573
chr9	86572251	86572251	F	cg19785759	C9orf64	TSS1500	shore	0.418162
chr9	91267411	91267411	F	cg03578548	LOC286238	TSS1500	opensea	-0.34591
chr9	99382466	99382466	F	cg02024846	CDC14B	TSS1500	shore	0.30624
chr9	125272648	125272648	R	cg11568797	OR1J2	TSS1500	opensea	-0.308783
chr9	125314173	125314173	R	cg05389237	OR1N2	TSS1500	opensea	-0.380312
chr9	125314394	125314394	F	cg04778907	OR1N2	TSS1500	opensea	-0.326683
chr9	133567787	133567787	R	cg02755759	EXOSC2	TSS1500	shore	0.347642
chr9	133567903	133567903	F	cg14614094	EXOSC2	TSS1500	shore	0.380732
chr9	133568226	133568226	R	cg14552982	EXOSC2	TSS1500	shore	0.337979
chr9	139923567	139923567	R	cg13806966	ABCA2	TSS1500	shore	-0.3053
chr9	140473680	140473680	F	cg13411784	WDR85	TSS1500	island	0.379555
chr1	1186506	1186506	F	cg10664344		IGR	shelf	-0.327124
chr1	2845139	2845139	R	cg00779565		IGR	shore	-0.326311
chr1	2845268	2845268	F	cg19846168		IGR	shore	-0.417395
chr1	4000154	4000154	F	cg00647233		IGR	opensea	-0.297228
chr1	5062216	5062216	R	cg17450308		IGR	opensea	-0.356776
chr1	8014393	8014393	R	cg02737782		IGR	island	0.315281
chr1	8014573	8014573	F	cg04112961		IGR	island	0.354575
chr1	8014650	8014650	F	cg11518359		IGR	island	0.3846
chr1	8156318	8156318	R	cg14961795		IGR	opensea	0.312643
chr1	8198083	8198083	R	cg26496749		IGR	opensea	-0.302656
chr1	8258113	8258113	R	cg06665786		IGR	opensea	-0.339354
chr1	9686523	9686523	R	cg17467525		IGR	shore	-0.359638
chr1	11702744	11702744	R	cg24035745		IGR	opensea	-0.379915
chr1	11979188	11979188	R	cg03977831		IGR	opensea	-0.32594
chr1	12100631	12100631	F	cg02156723		IGR	opensea	-0.538727
chr1	14382172	14382172	R	cg08548284		IGR	opensea	-0.323667
chr1	16505099	16505099	F	cg12885388		IGR	opensea	0.327877
chr1	17215477	17215477	F	cg14981532		IGR	island	0.471228
chr1	17215970	17215970	F	cg01164671		IGR	island	0.347139
chr1	17216009	17216009	R	cg01056467		IGR	island	0.367403
chr1	17216167	17216167	R	cg17179842		IGR	shore	0.365806
chr1	17475819	17475819	R	cg10432422		IGR	island	0.41102
chr1	17475832	17475832	F	cg26516532		IGR	island	0.376489
chr1	17476074	17476074	F	cg04684114		IGR	island	0.311774
chr1	18158470	18158470	R	cg01648953		IGR	opensea	-0.313551
chr1	18712148	18712148	R	cg26111295		IGR	opensea	-0.388189
chr1	19832306	19832306	F	cg05828408		IGR	opensea	-0.32154
chr1	20697328	20697328	R	cg26315261		IGR	shelf	-0.318666
chr1	23912230	23912230	F	cg25683854		IGR	opensea	-0.345811
chr1	25054216	25054216	F	cg24707354		IGR	opensea	-0.299546
chr1	27849092	27849092	R	cg18512645		IGR	opensea	-0.327861
chr1	27849102	27849102	R	cg03604774		IGR	opensea	-0.372005
chr1	27849295	27849295	R	cg24527636		IGR	opensea	-0.365789
chr1	28648999	28648999	R	cg25855856		IGR	opensea	0.384693
chr1	29101849	29101849	R	cg22861340		IGR	island	0.37468
chr1	29102068	29102068	F	cg10387543		IGR	island	0.34225
chr1	32054510	32054510	F	cg12905085		IGR	island	0.457504
chr1	32054766	32054766	R	cg08169827		IGR	island	0.532194
chr1	32237923	32237923	F	cg04878000		IGR	island	0.386711
chr1	32238105	32238105	F	cg03774520		IGR	island	0.338673
chr1	32420496	32420496	F	cg15802887		IGR	opensea	-0.319296
chr1	32532462	32532462	R	cg12824423		IGR	opensea	-0.303217
chr1	33373249	33373249	F	cg14663589		IGR	opensea	-0.303134
chr1	33899352	33899352	R	cg19082496		IGR	shelf	-0.385297
chr1	37609732	37609732	F	cg11183332		IGR	opensea	-0.332879
chr1	38530169	38530169	R	cg16233076		IGR	opensea	-0.356863
chr1	38917443	38917443	F	cg16428597		IGR	opensea	-0.306134
chr1	38964926	38964926	F	cg25733578		IGR	opensea	-0.385954
chr1	39451509	39451509	F	cg16266893		IGR	opensea	0.32163
chr1	40598394	40598394	R	cg01015662		IGR	shore	0.317741
chr1	40598455	40598455	F	cg07405182		IGR	shore	0.379077
chr1	40598779	40598779	F	cg16458866		IGR	island	0.308437
chr1	43473030	43473030	R	cg04857403		IGR	island	0.378514
chr1	43473097	43473097	R	cg03343013		IGR	island	0.341562
chr1	43473392	43473392	F	cg05259305		IGR	shore	0.33216
chr1	43473460	43473460	R	cg13918150		IGR	shore	0.350428
chr1	43609431	43609431	F	cg24729378		IGR	opensea	0.388721
chr1	43609461	43609461	R	cg04364629		IGR	opensea	0.441561
chr1	46632696	46632696	F	cg27636310		IGR	island	0.378087
chr1	46632871	46632871	F	cg14709691		IGR	island	0.32843
chr1	48522093	48522093	R	cg21128127		IGR	opensea	0.345128
chr1	54203548	54203548	R	cg05927190		IGR	island	0.415453
chr1	54203678	54203678	F	cg17786642		IGR	island	0.440338
chr1	55232442	55232442	F	cg08033127		IGR	shelf	0.34965
chr1	56397400	56397400	R	cg19302183		IGR	opensea	-0.315175
chr1	56432132	56432132	R	cg04817532		IGR	opensea	-0.31829
chr1	56842338	56842338	R	cg26837800		IGR	opensea	-0.327759
chr1	57385328	57385328	R	cg00118500		IGR	opensea	0.388112
chr1	59441766	59441766	F	cg11445178		IGR	opensea	-0.348611
chr1	60433255	60433255	R	cg08824395		IGR	opensea	-0.329579
chr1	64170964	64170964	R	cg03119829		IGR	opensea	0.324162
chr1	64212080	64212080	R	cg22046201		IGR	opensea	-0.396466
chr1	64238002	64238002	F	cg16261614		IGR	shore	0.371256
chr1	68006317	68006317	F	cg17207235		IGR	opensea	0.374581
chr1	68075944	68075944	F	cg00744902		IGR	opensea	0.391611
chr1	68111425	68111425	F	cg09143268		IGR	opensea	0.299416
chr1	68140506	68140506	R	cg11747935		IGR	opensea	-0.43654
chr1	71172023	71172023	F	cg10239860		IGR	opensea	0.308178
chr1	71172089	71172089	R	cg19601666		IGR	opensea	0.455346
chr1	73183527	73183527	F	cg12530140		IGR	opensea	-0.330275
chr1	73657635	73657635	R	cg05856371		IGR	opensea	-0.305689
chr1	74174660	74174660	R	cg24146618		IGR	opensea	-0.365166
chr1	75428569	75428569	F	cg09117417		IGR	opensea	-0.316141
chr1	75428722	75428722	F	cg12382835		IGR	opensea	-0.335479
chr1	77230959	77230959	R	cg14562765		IGR	opensea	-0.357119
chr1	79839273	79839273	F	cg15578842		IGR	opensea	-0.309606
chr1	80041257	80041257	F	cg26059844		IGR	opensea	-0.359542
chr1	80365805	80365805	F	cg10740422		IGR	opensea	-0.333379
chr1	85170968	85170968	F	cg12200985		IGR	opensea	0.360465
chr1	85220130	85220130	F	cg20267580		IGR	island	0.328927
chr1	85710632	85710632	R	cg27558693		IGR	opensea	-0.303461
chr1	86081680	86081680	R	cg13388692		IGR	shore	0.31969
chr1	86081701	86081701	R	cg19800670		IGR	island	0.337014
chr1	87774698	87774698	F	cg10985956		IGR	opensea	0.306671
chr1	89765537	89765537	R	cg07136210		IGR	opensea	0.478454
chr1	91557617	91557617	R	cg11342821		IGR	opensea	-0.408583
chr1	94429423	94429423	F	cg20023884		IGR	opensea	0.300421
chr1	95847014	95847014	F	cg11525297		IGR	opensea	-0.327361
chr1	95847781	95847781	R	cg17408498		IGR	opensea	-0.342666
chr1	96044237	96044237	F	cg25802439		IGR	opensea	-0.430474
chr1	98404032	98404032	F	cg14378231		IGR	opensea	-0.336311
chr1	98404100	98404100	F	cg16133827		IGR	opensea	-0.403287
chr1	98434519	98434519	R	cg02400506		IGR	opensea	-0.324482
chr1	98606306	98606306	R	cg10600112		IGR	opensea	-0.302706
chr1	98789535	98789535	F	cg12593746		IGR	opensea	-0.309928
chr1	99636927	99636927	R	cg21924314		IGR	opensea	0.380432
chr1	100996682	100996682	R	cg23722588		IGR	opensea	-0.315821
chr1	106615082	106615082	F	cg12405859		IGR	opensea	-0.314251
chr1	106615686	106615686	F	cg07821808		IGR	opensea	-0.318221
chr1	107360492	107360492	R	cg21023144		IGR	opensea	-0.356418
chr1	108066602	108066602	R	cg00891611		IGR	opensea	0.368591
chr1	111259789	111259789	R	cg06272768		IGR	opensea	-0.383595
chr1	111308221	111308221	F	cg16172507		IGR	opensea	-0.324124
chr1	111329947	111329947	F	cg15022604		IGR	opensea	-0.478841
chr1	111359939	111359939	F	cg14564255		IGR	opensea	-0.303252
chr1	111459642	111459642	F	cg00480032		IGR	opensea	-0.486029
chr1	111625492	111625492	F	cg08899239		IGR	opensea	-0.325861
chr1	112607098	112607098	F	cg06161010		IGR	opensea	-0.328373
chr1	113285940	113285940	R	cg00698771		IGR	shore	0.337765
chr1	113286397	113286397	R	cg11685510		IGR	island	0.388609
chr1	113286757	113286757	F	cg22865470		IGR	island	0.351976
chr1	113709172	113709172	F	cg26463806		IGR	opensea	0.314963
chr1	115732999	115732999	R	cg23981702		IGR	opensea	-0.300261
chr1	118229681	118229681	F	cg12719233		IGR	opensea	0.306405
chr1	118389869	118389869	R	cg16159258		IGR	opensea	0.301461
chr1	119534088	119534088	F	cg06528645		IGR	shore	0.38472
chr1	119534644	119534644	F	cg21301805		IGR	shore	0.424912
chr1	119534899	119534899	R	cg13577628		IGR	shore	0.433597
chr1	119536288	119536288	F	cg17436134		IGR	shore	0.547346
chr1	119541833	119541833	F	cg26570165		IGR	shore	0.474711
chr1	119542159	119542159	R	cg25386234		IGR	shore	0.340011
chr1	119542295	119542295	R	cg24434800		IGR	shore	0.337818
chr1	119542629	119542629	F	cg27268556		IGR	shore	0.4582
chr1	119543057	119543057	R	cg12659883		IGR	island	0.357413
chr1	119545275	119545275	F	cg17180237		IGR	shore	0.322547
chr1	119548527	119548527	F	cg15724945		IGR	shore	0.365059
chr1	119548852	119548852	F	cg09232478		IGR	shore	0.510332
chr1	119549145	119549145	R	cg10572355		IGR	island	0.377756
chr1	119550191	119550191	F	cg25771271		IGR	island	0.332906
chr1	119550674	119550674	R	cg03476613		IGR	island	0.336369
chr1	146544044	146544044	F	cg23019889		IGR	island	0.346464
chr1	147737016	147737016	R	cg25862444		IGR	island	0.303003
chr1	147737207	147737207	R	cg22697853		IGR	island	0.357602
chr1	147752823	147752823	R	cg02909688		IGR	shore	0.472573
chr1	147752860	147752860	R	cg05959459		IGR	island	0.464453
chr1	147775609	147775609	F	cg00721572		IGR	shore	0.509037
chr1	147781827	147781827	F	cg18140268		IGR	shore	0.457403
chr1	147782116	147782116	F	cg23206461		IGR	island	0.482078
chr1	147782279	147782279	R	cg13392957		IGR	island	0.315934
chr1	147782452	147782452	F	cg13067553		IGR	island	0.448327
chr1	147782472	147782472	F	cg03242265		IGR	island	0.46539
chr1	152093622	152093622	R	cg06346150		IGR	opensea	-0.36612
chr1	152555187	152555187	F	cg17242116		IGR	opensea	-0.311363
chr1	157164556	157164556	R	cg21687740		IGR	island	0.476706
chr1	157164983	157164983	R	cg00272446		IGR	island	0.336005
chr1	157165134	157165134	F	cg13355424		IGR	island	0.362285
chr1	157386488	157386488	F	cg13907633		IGR	opensea	-0.310879
chr1	157623294	157623294	F	cg16986431		IGR	opensea	-0.417284
chr1	157646983	157646983	R	cg14486799		IGR	opensea	-0.340597
chr1	157647730	157647730	F	cg08583841		IGR	opensea	-0.341631
chr1	157896400	157896400	F	cg25028404		IGR	opensea	-0.340269
chr1	158174399	158174399	R	cg07377195		IGR	opensea	-0.298519
chr1	158254116	158254116	F	cg19387132		IGR	opensea	-0.38214
chr1	158303775	158303775	F	cg25075375		IGR	opensea	-0.335623
chr1	158431333	158431333	R	cg07255378		IGR	opensea	-0.356752
chr1	158463096	158463096	F	cg26557737		IGR	opensea	-0.404639
chr1	158564533	158564533	F	cg18035861		IGR	opensea	-0.41673
chr1	158564817	158564817	F	cg25994907		IGR	opensea	-0.383279
chr1	158564883	158564883	F	cg26822733		IGR	opensea	-0.372429
chr1	159132658	159132658	F	cg23480237		IGR	opensea	-0.355382
chr1	159138217	159138217	F	cg11518938		IGR	shelf	-0.36095
chr1	159209348	159209348	R	cg09078226		IGR	opensea	-0.349088
chr1	159252119	159252119	R	cg16636885		IGR	opensea	-0.304084
chr1	159399288	159399288	F	cg14543212		IGR	opensea	-0.33318
chr1	159439121	159439121	R	cg09441582		IGR	opensea	-0.343721
chr1	159550161	159550161	F	cg05917359		IGR	opensea	-0.366876
chr1	160505740	160505740	R	cg25792561		IGR	opensea	-0.420599
chr1	161510171	161510171	R	cg08660938		IGR	opensea	0.3027
chr1	161931993	161931993	F	cg24367957		IGR	opensea	-0.320656
chr1	162005270	162005270	R	cg02648619		IGR	opensea	-0.321911
chr1	165986832	165986832	F	cg27485649		IGR	opensea	0.328241
chr1	166459344	166459344	F	cg17665268		IGR	opensea	-0.451468
chr1	168368506	168368506	R	cg15190241		IGR	opensea	-0.318734
chr1	168721676	168721676	R	cg00256709		IGR	opensea	-0.307656
chr1	168753307	168753307	F	cg17141017		IGR	opensea	-0.309554
chr1	168802757	168802757	R	cg05816791		IGR	opensea	0.338975
chr1	169073185	169073185	R	cg10681460		IGR	shore	0.35243
chr1	169640191	169640191	R	cg23535784		IGR	opensea	-0.307966
chr1	172449221	172449221	F	cg21922512		IGR	opensea	-0.303859
chr1	172987127	172987127	F	cg04924453		IGR	opensea	-0.316969
chr1	172989890	172989890	R	cg14172282		IGR	opensea	-0.332213
chr1	175186983	175186983	F	cg10196751		IGR	opensea	-0.302995
chr1	177787250	177787250	R	cg18251761		IGR	opensea	0.3781
chr1	180878648	180878648	R	cg13209335		IGR	shelf	0.353062
chr1	182144697	182144697	F	cg09664171		IGR	opensea	-0.340523
chr1	186587800	186587800	R	cg15854602		IGR	opensea	-0.366862
chr1	188563960	188563960	F	cg25046039		IGR	opensea	-0.307333
chr1	188684845	188684845	F	cg24957401		IGR	opensea	-0.328755
chr1	189636225	189636225	R	cg10971884		IGR	opensea	-0.306013
chr1	192194980	192194980	F	cg00273875		IGR	opensea	-0.327437
chr1	192442774	192442774	F	cg25242466		IGR	opensea	-0.322579
chr1	192873912	192873912	F	cg12725760		IGR	opensea	-0.300197
chr1	195164833	195164833	F	cg08190027		IGR	opensea	-0.301276
chr1	198120958	198120958	F	cg26910675		IGR	opensea	0.313333
chr1	199098538	199098538	F	cg18842153		IGR	opensea	0.304414
chr1	201088537	201088537	R	cg23594461		IGR	shelf	0.309506
chr1	201425990	201425990	R	cg02897366		IGR	opensea	-0.402367
chr1	203294225	203294225	R	cg04048950		IGR	shelf	-0.300114
chr1	203482523	203482523	R	cg23172671		IGR	opensea	-0.331767
chr1	208132388	208132388	R	cg13298199		IGR	island	0.304761
chr1	208133116	208133116	F	cg15770106		IGR	island	0.305608
chr1	209405064	209405064	F	cg00563824		IGR	island	0.30276
chr1	209523730	209523730	R	cg17143843		IGR	opensea	-0.325905
chr1	209921031	209921031	F	cg18390816		IGR	island	0.386859
chr1	209921096	209921096	R	cg26758551		IGR	island	0.319202
chr1	209921129	209921129	F	cg16432022		IGR	island	0.383742
chr1	212810277	212810277	R	cg10190843		IGR	opensea	-0.359097
chr1	213898865	213898865	R	cg18732257		IGR	opensea	-0.297143
chr1	213967064	213967064	R	cg05927178		IGR	opensea	0.300791
chr1	219471972	219471972	R	cg18714477		IGR	opensea	-0.314953
chr1	219944417	219944417	R	cg27106183		IGR	opensea	-0.304248
chr1	220660670	220660670	R	cg05344412		IGR	opensea	0.330284
chr1	221051117	221051117	R	cg03329019		IGR	shore	0.369653
chr1	221060360	221060360	F	cg07722657		IGR	shore	0.425084
chr1	221062819	221062819	R	cg16008148		IGR	shore	0.303773
chr1	221063484	221063484	F	cg25464265		IGR	shore	0.412096
chr1	221064388	221064388	F	cg07903237		IGR	shore	0.349132
chr1	224626870	224626870	R	cg18076723		IGR	opensea	0.344594
chr1	225629247	225629247	F	cg25598447		IGR	opensea	0.394439
chr1	227748424	227748424	R	cg02736395		IGR	island	0.300486
chr1	227748712	227748712	R	cg14789818		IGR	island	0.4515
chr1	227748719	227748719	R	cg20699586		IGR	island	0.477977
chr1	227895778	227895778	F	cg27243955		IGR	opensea	-0.333034
chr1	228075423	228075423	R	cg13092405		IGR	island	0.317778
chr1	228634265	228634265	R	cg26345105		IGR	shore	0.300609
chr1	228657381	228657381	F	cg25734842		IGR	island	0.49692
chr1	228657536	228657536	F	cg25622154		IGR	island	0.375112
chr1	228657627	228657627	F	cg03569277		IGR	shore	0.345288
chr1	229506493	229506493	F	cg23830335		IGR	opensea	-0.346121
chr1	229517201	229517201	F	cg06800784		IGR	opensea	0.337444
chr1	229517862	229517862	R	cg13127385		IGR	opensea	0.315164
chr1	229830303	229830303	R	cg17425590		IGR	opensea	-0.371109
chr1	230567414	230567414	R	cg02118824		IGR	opensea	-0.304161
chr1	234521742	234521742	F	cg21039235		IGR	opensea	-0.32391
chr1	234990151	234990151	F	cg27380011		IGR	opensea	-0.323741
chr1	235012297	235012297	R	cg11926773		IGR	opensea	-0.374561
chr1	235092818	235092818	R	cg20331567		IGR	opensea	-0.332199
chr1	235099151	235099151	F	cg02088292		IGR	opensea	-0.327532
chr1	235120401	235120401	R	cg08500811		IGR	opensea	0.301141
chr1	235122803	235122803	R	cg17819085		IGR	opensea	0.311813
chr1	235147744	235147744	R	cg03518729		IGR	opensea	-0.307149
chr1	235159410	235159410	F	cg08132573		IGR	opensea	-0.335931
chr1	235268621	235268621	F	cg16576033		IGR	shore	-0.330216
chr1	236273181	236273181	R	cg19811148		IGR	opensea	-0.316653
chr1	242767727	242767727	F	cg14520280		IGR	opensea	-0.361228
chr1	244952339	244952339	F	cg24462001		IGR	opensea	-0.308863
chr1	246946115	246946115	F	cg24255988		IGR	opensea	-0.424717
chr1	247511364	247511364	R	cg15092219		IGR	opensea	0.445345
chr1	247511400	247511400	F	cg06902607		IGR	opensea	0.398107
chr1	247511469	247511469	F	cg26276327		IGR	opensea	0.442887
chr1	247887281	247887281	R	cg27648850		IGR	opensea	-0.377289
chr1	248274759	248274759	R	cg09598075		IGR	opensea	-0.321023
chr1	248759398	248759398	R	cg12539044		IGR	opensea	-0.333392
chr10	1981436	1981436	F	cg03701930		IGR	opensea	-0.308682
chr10	2815988	2815988	F	cg05168945		IGR	shore	-0.30514
chr10	2951326	2951326	F	cg14824052		IGR	opensea	-0.330895
chr10	3929103	3929103	R	cg18625916		IGR	opensea	0.301901
chr10	4555431	4555431	F	cg17352467		IGR	opensea	0.314405
chr10	5359758	5359758	F	cg12001774		IGR	opensea	-0.315652
chr10	5638124	5638124	R	cg20800726		IGR	opensea	-0.32453
chr10	6051242	6051242	R	cg04234104		IGR	opensea	-0.300376
chr10	6183284	6183284	F	cg14127767		IGR	shelf	-0.413412
chr10	6805506	6805506	F	cg10057940		IGR	opensea	0.304213
chr10	7486981	7486981	F	cg09137125		IGR	opensea	-0.368746
chr10	7491367	7491367	F	cg09938582		IGR	opensea	-0.336596
chr10	7567923	7567923	F	cg03920764		IGR	opensea	-0.324067
chr10	7567980	7567980	R	cg09845293		IGR	opensea	-0.313155
chr10	7568106	7568106	R	cg24202448		IGR	opensea	-0.322147
chr10	11727286	11727286	F	cg17184704		IGR	opensea	-0.44326
chr10	11727465	11727465	R	cg13982090		IGR	opensea	-0.409089
chr10	15461335	15461335	R	cg16729325		IGR	opensea	0.300492
chr10	21473479	21473479	F	cg12866368		IGR	opensea	-0.323044
chr10	21653244	21653244	R	cg12427286		IGR	opensea	0.300432
chr10	21799143	21799143	R	cg04714110		IGR	island	0.364259
chr10	21799314	21799314	F	cg04707519		IGR	island	0.469558
chr10	21799395	21799395	R	cg03610228		IGR	shore	0.379466
chr10	22622793	22622793	R	cg09099868		IGR	shore	0.490784
chr10	22623213	22623213	F	cg18537454		IGR	shore	0.338442
chr10	22623548	22623548	R	cg13327545		IGR	island	0.507956
chr10	22623821	22623821	F	cg12490835		IGR	island	0.38966
chr10	22623910	22623910	F	cg07351143		IGR	island	0.43968
chr10	22624094	22624094	R	cg21383487		IGR	island	0.329637
chr10	22624205	22624205	F	cg09432590		IGR	island	0.301254
chr10	22624374	22624374	F	cg10375078		IGR	island	0.342502
chr10	22627645	22627645	R	cg17504806		IGR	shore	0.319887
chr10	22765645	22765645	F	cg04819760		IGR	island	0.387027
chr10	22765840	22765840	R	cg25324047		IGR	island	0.336852
chr10	23027722	23027722	R	cg09859507		IGR	opensea	0.316273
chr10	23484867	23484867	R	cg15904283		IGR	shore	0.425228
chr10	23732088	23732088	F	cg16152753		IGR	shelf	0.303668
chr10	24841602	24841602	R	cg06854478		IGR	opensea	0.363389
chr10	27235260	27235260	R	cg13155609		IGR	opensea	0.301661
chr10	29542019	29542019	F	cg13369671		IGR	opensea	-0.300439
chr10	30129021	30129021	R	cg22639530		IGR	opensea	0.302351
chr10	30238815	30238815	F	cg20073153		IGR	opensea	-0.299209
chr10	31912539	31912539	R	cg04752496		IGR	opensea	-0.311973
chr10	35150696	35150696	F	cg07824555		IGR	opensea	-0.338809
chr10	36828215	36828215	R	cg23244859		IGR	opensea	-0.366044
chr10	36923818	36923818	R	cg07409443		IGR	opensea	-0.371768
chr10	37228631	37228631	F	cg25174946		IGR	opensea	-0.303172
chr10	38015579	38015579	F	cg20499290		IGR	opensea	0.333708
chr10	43239787	43239787	F	cg04456085		IGR	opensea	-0.305891
chr10	43428578	43428578	F	cg12352960		IGR	island	0.385402
chr10	43832611	43832611	F	cg01904729		IGR	opensea	0.338127
chr10	44185097	44185097	R	cg12868173		IGR	island	0.403744
chr10	44754714	44754714	F	cg12050175		IGR	opensea	0.356588
chr10	44788812	44788812	R	cg21163429		IGR	island	0.379529
chr10	44789077	44789077	R	cg23563014		IGR	island	0.358734
chr10	44847999	44847999	F	cg16558695		IGR	opensea	-0.302891
chr10	50776495	50776495	R	cg08349141		IGR	opensea	-0.359871
chr10	59804100	59804100	R	cg01886151		IGR	opensea	-0.315126
chr10	59936755	59936755	F	cg08715829		IGR	opensea	-0.317549
chr10	60086874	60086874	R	cg18868182		IGR	opensea	0.336821
chr10	60086891	60086891	R	cg19894382		IGR	opensea	0.358361
chr10	63657363	63657363	F	cg12845268		IGR	opensea	0.339855
chr10	64495627	64495627	F	cg06677416		IGR	opensea	-0.298021
chr10	65460017	65460017	F	cg09923954		IGR	opensea	-0.342467
chr10	66268067	66268067	R	cg26567163		IGR	opensea	-0.356873
chr10	73631213	73631213	F	cg05550145		IGR	opensea	-0.342088
chr10	73687855	73687855	R	cg14168059		IGR	opensea	0.350819
chr10	73786493	73786493	F	cg04961278		IGR	opensea	-0.312798
chr10	73787559	73787559	R	cg17209404		IGR	opensea	-0.335836
chr10	74080805	74080805	R	cg11481582		IGR	shore	-0.356501
chr10	74397336	74397336	R	cg15266651		IGR	opensea	-0.315314
chr10	75666539	75666539	R	cg13762385		IGR	opensea	-0.330839
chr10	75666847	75666847	F	cg19399285		IGR	shelf	-0.457417
chr10	76573155	76573155	R	cg27102629		IGR	shore	0.46589
chr10	76573396	76573396	R	cg04359418		IGR	island	0.549146
chr10	76573506	76573506	F	cg14906690		IGR	island	0.465025
chr10	77268489	77268489	R	cg18436214		IGR	opensea	-0.391524
chr10	77468337	77468337	F	cg02571436		IGR	opensea	-0.312117
chr10	77524487	77524487	F	cg22610620		IGR	opensea	-0.407221
chr10	78392320	78392320	F	cg18941641		IGR	opensea	0.341466
chr10	80008481	80008481	R	cg16680677		IGR	opensea	-0.321866
chr10	80076484	80076484	R	cg26413192		IGR	opensea	-0.333361
chr10	80319770	80319770	R	cg08326300		IGR	opensea	-0.324546
chr10	80501448	80501448	R	cg04485391		IGR	opensea	-0.349542
chr10	81967195	81967195	F	cg06813382		IGR	island	0.303801
chr10	81967516	81967516	F	cg11647108		IGR	island	0.42356
chr10	81967536	81967536	F	cg09614479		IGR	shore	0.441234
chr10	81967666	81967666	R	cg10775231		IGR	shore	0.402665
chr10	84810710	84810710	R	cg06645192		IGR	opensea	-0.352506
chr10	85049656	85049656	F	cg03983740		IGR	opensea	-0.309251
chr10	88171319	88171319	F	cg02133079		IGR	opensea	-0.315442
chr10	88295210	88295210	R	cg26929272		IGR	island	0.470135
chr10	88296171	88296171	R	cg15511801		IGR	island	0.529768
chr10	88296364	88296364	F	cg13508175		IGR	island	0.37611
chr10	88391965	88391965	F	cg23516463		IGR	island	0.352859
chr10	88392088	88392088	R	cg26830291		IGR	island	0.347167
chr10	89824691	89824691	R	cg06465731		IGR	opensea	-0.334913
chr10	90553647	90553647	R	cg27339271		IGR	opensea	-0.341626
chr10	91907883	91907883	R	cg21980994		IGR	opensea	-0.309432
chr10	91924411	91924411	F	cg18100580		IGR	opensea	-0.345845
chr10	92112128	92112128	R	cg03644514		IGR	opensea	-0.364603
chr10	92478259	92478259	R	cg03471573		IGR	opensea	-0.308653
chr10	93805590	93805590	R	cg10530889		IGR	island	0.409046
chr10	93805682	93805682	F	cg07028396		IGR	island	0.438567
chr10	94179972	94179972	F	cg14807565		IGR	shore	0.378244
chr10	94180046	94180046	R	cg18303477		IGR	shore	0.318989
chr10	98755748	98755748	F	cg14774445		IGR	opensea	-0.335967
chr10	100109635	100109635	F	cg23078268		IGR	opensea	-0.299654
chr10	102419209	102419209	F	cg17384380		IGR	island	0.40817
chr10	102419245	102419245	F	cg00557947		IGR	island	0.47071
chr10	102419409	102419409	F	cg07919443		IGR	island	0.368945
chr10	102475429	102475429	R	cg20100910		IGR	island	0.462796
chr10	102807443	102807443	F	cg07426618		IGR	shore	0.340374
chr10	102899262	102899262	R	cg14383658		IGR	island	0.334798
chr10	102899285	102899285	F	cg05482942		IGR	island	0.421593
chr10	102998662	102998662	R	cg04886846		IGR	shelf	0.331032
chr10	102998738	102998738	F	cg19229182		IGR	shelf	0.30543
chr10	102998762	102998762	F	cg10996596		IGR	shelf	0.304005
chr10	103539189	103539189	R	cg05364307		IGR	island	0.320032
chr10	107118916	107118916	R	cg04420253		IGR	opensea	-0.3213
chr10	112993304	112993304	F	cg05250818		IGR	opensea	-0.32928
chr10	114595907	114595907	F	cg22676382		IGR	opensea	-0.308183
chr10	114676148	114676148	R	cg18214572		IGR	opensea	0.304084
chr10	119311636	119311636	R	cg19048251		IGR	island	0.315804
chr10	119494494	119494494	R	cg06369992		IGR	island	0.429766
chr10	119494516	119494516	R	cg25463440		IGR	island	0.41368
chr10	119494652	119494652	R	cg04248757		IGR	island	0.359633
chr10	119494671	119494671	R	cg19912142		IGR	island	0.406552
chr10	120291182	120291182	F	cg17524560		IGR	opensea	-0.309154
chr10	120850686	120850686	F	cg08751348		IGR	opensea	-0.328173
chr10	122708532	122708532	R	cg05627029		IGR	island	0.415731
chr10	122708739	122708739	F	cg19111459		IGR	island	0.518779
chr10	122708898	122708898	F	cg26518861		IGR	island	0.454861
chr10	123209512	123209512	F	cg23152866		IGR	opensea	0.3336
chr10	125395443	125395443	R	cg11702934		IGR	opensea	-0.337129
chr10	126437642	126437642	R	cg03404292		IGR	opensea	-0.319751
chr10	129359860	129359860	F	cg03771513		IGR	opensea	-0.335595
chr10	129379138	129379138	F	cg18664918		IGR	opensea	-0.299756
chr10	129379217	129379217	F	cg19285797		IGR	opensea	-0.342074
chr10	129493045	129493045	F	cg11867197		IGR	opensea	0.326984
chr10	129533731	129533731	F	cg14716990		IGR	shore	0.302032
chr10	130064021	130064021	R	cg19988426		IGR	island	0.336968
chr10	130064137	130064137	R	cg10803098		IGR	island	0.397987
chr10	130064296	130064296	R	cg04884318		IGR	shore	0.302423
chr10	130073418	130073418	F	cg18049030		IGR	opensea	-0.391945
chr10	130373079	130373079	R	cg13191352		IGR	opensea	-0.306106
chr10	131631816	131631816	F	cg10799668		IGR	opensea	-0.303719
chr10	131631850	131631850	R	cg23391090		IGR	opensea	-0.315859
chr10	131927345	131927345	R	cg11693285		IGR	island	0.30696
chr10	133218314	133218314	F	cg23484230		IGR	opensea	-0.302077
chr10	133318072	133318072	F	cg19895324		IGR	island	-0.341981
chr10	133318201	133318201	R	cg16560389		IGR	island	-0.520209
chr10	133837230	133837230	F	cg14074184		IGR	opensea	-0.3144
chr10	133858385	133858385	R	cg18959081		IGR	opensea	-0.30688
chr10	133858570	133858570	R	cg09210135		IGR	opensea	-0.34925
chr10	133858741	133858741	R	cg04707217		IGR	opensea	-0.363861
chr10	134631702	134631702	R	cg08750509		IGR	opensea	-0.306686
chr10	134647082	134647082	R	cg24915508		IGR	opensea	-0.370456
chr10	134725087	134725087	F	cg18048370		IGR	shelf	-0.330854
chr10	134738509	134738509	F	cg03425262		IGR	island	-0.318188
chr10	134738569	134738569	F	cg08498533		IGR	island	-0.331672
chr10	135153937	135153937	F	cg17247026		IGR	shelf	-0.457691
chr10	135153961	135153961	F	cg24748548		IGR	shelf	-0.428695
chr10	135153972	135153972	R	cg06922248		IGR	shelf	-0.330513
chr11	259554	259554	F	cg12958961		IGR	opensea	-0.317437
chr11	336031	336031	R	cg18085030		IGR	opensea	-0.3283
chr11	1056274	1056274	F	cg24616385		IGR	shore	-0.316132
chr11	5301844	5301844	R	cg09248694		IGR	opensea	-0.307206
chr11	5545506	5545506	R	cg10503208		IGR	opensea	-0.337645
chr11	5893738	5893738	R	cg17933702		IGR	opensea	-0.349702
chr11	5951360	5951360	F	cg23696955		IGR	opensea	-0.301883
chr11	6846765	6846765	R	cg21777301		IGR	opensea	-0.309142
chr11	7699330	7699330	F	cg09636245		IGR	shelf	-0.299795
chr11	8006143	8006143	R	cg16993015		IGR	shelf	-0.321838
chr11	8625709	8625709	F	cg11528367		IGR	opensea	0.40198
chr11	11001248	11001248	R	cg25941061		IGR	opensea	-0.30746
chr11	13136812	13136812	F	cg12829473		IGR	opensea	-0.323008
chr11	14926472	14926472	F	cg24706275		IGR	island	0.312754
chr11	14926780	14926780	F	cg14768245		IGR	island	0.426626
chr11	14927004	14927004	F	cg03486485		IGR	island	0.441804
chr11	14927456	14927456	R	cg25251204		IGR	island	0.331758
chr11	14927489	14927489	R	cg00085434		IGR	island	0.340031
chr11	14927549	14927549	R	cg16394018		IGR	island	0.303911
chr11	16632088	16632088	F	cg01236063		IGR	shore	0.321718
chr11	16632311	16632311	R	cg25336874		IGR	shore	0.371135
chr11	16632509	16632509	R	cg20216139		IGR	island	0.440248
chr11	16632636	16632636	F	cg07345999		IGR	island	0.386465
chr11	18406198	18406198	F	cg00748912		IGR	opensea	0.351632
chr11	18978169	18978169	R	cg27410165		IGR	opensea	-0.353081
chr11	19049726	19049726	F	cg23763649		IGR	opensea	-0.314443
chr11	20153574	20153574	F	cg14819603		IGR	opensea	0.3124
chr11	20186078	20186078	F	cg10167266		IGR	shore	0.38803
chr11	20229517	20229517	R	cg16543094		IGR	opensea	0.409529
chr11	20229879	20229879	R	cg21678813		IGR	opensea	0.426729
chr11	20230021	20230021	F	cg11169641		IGR	opensea	0.462316
chr11	20230313	20230313	R	cg24427895		IGR	opensea	0.39225
chr11	20230330	20230330	F	cg18261246		IGR	opensea	0.332732
chr11	22010309	22010309	R	cg18103367		IGR	opensea	-0.334569
chr11	26800135	26800135	R	cg26210364		IGR	opensea	-0.31198
chr11	26967952	26967952	F	cg03691353		IGR	opensea	-0.412387
chr11	28439832	28439832	R	cg04416257		IGR	opensea	-0.303341
chr11	29195379	29195379	F	cg22944610		IGR	opensea	-0.361434
chr11	29283166	29283166	F	cg21232687		IGR	opensea	-0.309196
chr11	30266048	30266048	R	cg23175824		IGR	opensea	-0.32429
chr11	31091140	31091140	R	cg16330062		IGR	opensea	-0.316974
chr11	32354742	32354742	F	cg06619621		IGR	shore	0.353778
chr11	32354958	32354958	R	cg08214423		IGR	island	0.567654
chr11	32355022	32355022	R	cg19908556		IGR	island	0.512305
chr11	32408432	32408432	R	cg18258224		IGR	opensea	-0.298659
chr11	33404678	33404678	R	cg19566482		IGR	opensea	-0.318164
chr11	33857075	33857075	R	cg07823267		IGR	opensea	-0.316009
chr11	41040030	41040030	R	cg14955976		IGR	opensea	-0.301952
chr11	43589582	43589582	R	cg04511463		IGR	opensea	-0.310423
chr11	48388416	48388416	F	cg19287492		IGR	opensea	-0.411349
chr11	50226789	50226789	F	cg24259560		IGR	shore	-0.364274
chr11	55547601	55547601	R	cg04133555		IGR	opensea	-0.363692
chr11	55577412	55577412	R	cg04604383		IGR	opensea	-0.323763
chr11	56289687	56289687	F	cg13304654		IGR	opensea	-0.333381
chr11	56549867	56549867	R	cg20407119		IGR	opensea	-0.372032
chr11	57019421	57019421	F	cg21141726		IGR	opensea	-0.348827
chr11	57638157	57638157	F	cg17033359		IGR	opensea	-0.352425
chr11	58085823	58085823	R	cg24432464		IGR	opensea	-0.298798
chr11	58086969	58086969	R	cg16008497		IGR	opensea	-0.38637
chr11	58731357	58731357	F	cg12635602		IGR	island	0.336507
chr11	58984446	58984446	R	cg14770102		IGR	opensea	-0.450612
chr11	58984544	58984544	F	cg24158259		IGR	opensea	-0.320476
chr11	59015338	59015338	R	cg27471192		IGR	opensea	-0.310652
chr11	59705578	59705578	R	cg17991066		IGR	opensea	-0.410547
chr11	59705801	59705801	F	cg07232465		IGR	opensea	-0.354104
chr11	59785552	59785552	F	cg05483505		IGR	opensea	-0.39482
chr11	59972522	59972522	F	cg17951016		IGR	opensea	-0.369288
chr11	60244624	60244624	R	cg09839093		IGR	opensea	-0.333994
chr11	60249801	60249801	R	cg02793494		IGR	opensea	-0.364948
chr11	61517149	61517149	R	cg04832291		IGR	shelf	-0.308859
chr11	61793285	61793285	F	cg21565960		IGR	opensea	-0.339749
chr11	63035103	63035103	F	cg10384725		IGR	opensea	-0.302059
chr11	64258103	64258103	R	cg08822897		IGR	opensea	-0.327081
chr11	64583197	64583197	R	cg11364926		IGR	opensea	0.321492
chr11	64653344	64653344	R	cg03957162		IGR	opensea	-0.32978
chr11	64660996	64660996	R	cg23923854		IGR	shore	0.302922
chr11	64739253	64739253	F	cg15681626		IGR	island	0.421001
chr11	65196125	65196125	F	cg22843803		IGR	opensea	0.335832
chr11	65239080	65239080	R	cg23299484		IGR	opensea	0.38379
chr11	67312897	67312897	R	cg05950610		IGR	opensea	0.325182
chr11	67325980	67325980	R	cg19262315		IGR	opensea	0.331884
chr11	67326002	67326002	F	cg10103635		IGR	opensea	0.472953
chr11	67326023	67326023	R	cg14647190		IGR	opensea	0.37715
chr11	67326220	67326220	R	cg09399878		IGR	opensea	0.308162
chr11	71117753	71117753	R	cg22147748		IGR	opensea	-0.360221
chr11	71956755	71956755	R	cg17445219		IGR	shore	0.378772
chr11	71956757	71956757	R	cg08907291		IGR	shore	0.376593
chr11	71956766	71956766	F	cg19478945		IGR	shore	0.31852
chr11	74384522	74384522	F	cg09975397		IGR	opensea	-0.322445
chr11	74733684	74733684	F	cg14813279		IGR	opensea	0.315574
chr11	74811529	74811529	R	cg18834082		IGR	opensea	-0.350693
chr11	74814758	74814758	F	cg05433293		IGR	opensea	-0.360558
chr11	75287721	75287721	F	cg17472111		IGR	opensea	0.326228
chr11	82502565	82502565	R	cg05486273		IGR	opensea	-0.311249
chr11	82529661	82529661	F	cg12853732		IGR	opensea	0.349526
chr11	85645743	85645743	R	cg01202519		IGR	island	0.31264
chr11	85856948	85856948	F	cg05883708		IGR	opensea	0.313473
chr11	85913645	85913645	R	cg26697286		IGR	opensea	0.397855
chr11	90897452	90897452	R	cg18011312		IGR	opensea	-0.305247
chr11	91987297	91987297	R	cg10821127		IGR	opensea	-0.313183
chr11	94883242	94883242	R	cg26773791		IGR	shore	0.400182
chr11	94883474	94883474	R	cg15594471		IGR	island	0.456718
chr11	94883722	94883722	R	cg09503596		IGR	island	0.462504
chr11	94884121	94884121	R	cg22049858		IGR	island	0.340098
chr11	95032420	95032420	F	cg24929096		IGR	opensea	-0.343759
chr11	100433017	100433017	R	cg05494668		IGR	opensea	0.324321
chr11	102511692	102511692	F	cg12394010		IGR	opensea	0.312517
chr11	102702285	102702285	R	cg09122096		IGR	opensea	0.382591
chr11	102702414	102702414	R	cg02344527		IGR	opensea	0.391613
chr11	103677058	103677058	R	cg17831511		IGR	opensea	0.319659
chr11	107339618	107339618	F	cg11420764		IGR	opensea	-0.336715
chr11	107458418	107458418	R	cg13060182		IGR	shelf	-0.362245
chr11	109855902	109855902	F	cg00870689		IGR	opensea	-0.320177
chr11	111298858	111298858	F	cg06532459		IGR	opensea	-0.299179
chr11	111649151	111649151	F	cg04134975		IGR	opensea	0.37096
chr11	111991342	111991342	R	cg03548415		IGR	opensea	-0.314184
chr11	115026903	115026903	F	cg08461160		IGR	shore	-0.356636
chr11	116103268	116103268	R	cg21754876		IGR	opensea	-0.499471
chr11	116103385	116103385	R	cg25414187		IGR	opensea	-0.435633
chr11	116228957	116228957	R	cg07537095		IGR	opensea	0.489753
chr11	116484495	116484495	F	cg09338489		IGR	opensea	-0.374079
chr11	119380820	119380820	R	cg26818489		IGR	opensea	-0.362505
chr11	119465617	119465617	F	cg20285594		IGR	opensea	-0.299934
chr11	119630362	119630362	F	cg25969122		IGR	opensea	-0.321889
chr11	124185113	124185113	R	cg11495719		IGR	opensea	-0.348292
chr11	124199796	124199796	F	cg15554554		IGR	opensea	-0.30927
chr11	124312521	124312521	R	cg03977862		IGR	opensea	-0.315417
chr11	124324477	124324477	F	cg03252499		IGR	opensea	-0.473414
chr11	128287696	128287696	R	cg03275049		IGR	opensea	-0.315483
chr11	128559075	128559075	R	cg14801518		IGR	shore	0.318554
chr11	130273254	130273254	R	cg17113932		IGR	opensea	-0.329941
chr11	133706356	133706356	F	cg19415202		IGR	shelf	-0.36203
chr12	562848	562848	F	cg23826980		IGR	island	-0.335834
chr12	563019	563019	F	cg16901862		IGR	island	-0.369933
chr12	1772230	1772230	R	cg24894584		IGR	island	0.400708
chr12	1772323	1772323	R	cg03371962		IGR	island	0.328898
chr12	4119514	4119514	R	cg05927015		IGR	opensea	0.394747
chr12	4124630	4124630	F	cg24887903		IGR	opensea	0.35187
chr12	6303229	6303229	F	cg04498672		IGR	opensea	-0.348052
chr12	6374036	6374036	F	cg16798825		IGR	opensea	0.302697
chr12	7665281	7665281	R	cg13709259		IGR	opensea	-0.297291
chr12	9297489	9297489	F	cg26632559		IGR	opensea	-0.327519
chr12	9768149	9768149	R	cg13211657		IGR	opensea	-0.42312
chr12	10961294	10961294	F	cg02074878		IGR	opensea	-0.325812
chr12	11500694	11500694	R	cg02152828		IGR	opensea	-0.313049
chr12	13289714	13289714	R	cg21617343		IGR	opensea	0.365396
chr12	16789976	16789976	R	cg25007045		IGR	opensea	-0.363744
chr12	16939458	16939458	F	cg19852097		IGR	opensea	-0.304633
chr12	16939636	16939636	F	cg24946611		IGR	opensea	-0.323536
chr12	17224634	17224634	F	cg09440308		IGR	opensea	-0.415987
chr12	17250637	17250637	R	cg19703871		IGR	opensea	-0.348365
chr12	17250812	17250812	F	cg01397392		IGR	opensea	-0.38751
chr12	17742010	17742010	F	cg27572085		IGR	opensea	-0.326703
chr12	17742157	17742157	F	cg26433289		IGR	opensea	-0.298105
chr12	17743430	17743430	F	cg24395974		IGR	opensea	-0.376656
chr12	17744107	17744107	R	cg20709627		IGR	opensea	-0.373236
chr12	17863052	17863052	F	cg23727169		IGR	opensea	-0.319677
chr12	17863067	17863067	F	cg26812232		IGR	opensea	-0.33019
chr12	17863587	17863587	R	cg25698973		IGR	opensea	-0.311485
chr12	19865160	19865160	R	cg08951301		IGR	opensea	-0.30119
chr12	21103340	21103340	R	cg04122494		IGR	opensea	-0.326695
chr12	25473300	25473300	F	cg06261947		IGR	opensea	-0.325629
chr12	25845187	25845187	F	cg12060056		IGR	opensea	-0.335255
chr12	26392567	26392567	R	cg09010707		IGR	opensea	-0.347961
chr12	26427748	26427748	R	cg09531520		IGR	opensea	-0.325742
chr12	26440650	26440650	R	cg06839607		IGR	opensea	-0.339877
chr12	30323251	30323251	F	cg22974982		IGR	island	0.390784
chr12	30353777	30353777	R	cg02059705		IGR	shore	0.32096
chr12	30354611	30354611	F	cg06634914		IGR	island	0.406745
chr12	30976001	30976001	F	cg13114921		IGR	island	0.320339
chr12	32607088	32607088	F	cg06623740		IGR	opensea	0.323733
chr12	32607254	32607254	R	cg04346791		IGR	opensea	0.330661
chr12	33625423	33625423	R	cg00508772		IGR	opensea	-0.364176
chr12	34061681	34061681	R	cg03846107		IGR	opensea	-0.32952
chr12	34076577	34076577	R	cg21483818		IGR	opensea	-0.377489
chr12	34076634	34076634	R	cg18679830		IGR	opensea	-0.390904
chr12	34076952	34076952	R	cg22592525		IGR	opensea	-0.373492
chr12	34357835	34357835	R	cg03595224		IGR	opensea	-0.320531
chr12	34484805	34484805	F	cg09487985		IGR	shelf	-0.308252
chr12	34488830	34488830	R	cg10923855		IGR	island	-0.351672
[truncated: 6,924 more rows]
