# Supplementary material for: Novel epigenetic signature, molecular subtypes and insights into IGF2/H19 dysregulation in Wilms tumour revealed by methylomic and transcriptomic profiling
Source: Research Square preprint supplement (doi:10.21203/rs.3.rs-8030860/v1), 2025-11-11
Supplement: Supplementary file 8 [file b1830a9b13e477bfce178c52.xlsx]

## Sheet: Table S10_KEGG enrich ncDEGs
KEGG analysis Up-Hypo
query	significant	p_value	term_size	query_size	intersection_size	precision	recall	term_id	source	term_name	effective_domain_size	source_order	parents	evidence_codes	intersection
query_1	TRUE	1.04779e-05	97	364	13	0.0357143	0.134021	KEGG:04514	KEGG	Cell adhesion molecules	17860	315	KEGG:00000	KEGG,KEGG,KEGG,KEGG,KEGG,KEGG,KEGG,KEGG,KEGG,KEGG,KEGG,KEGG,KEGG	CD276,CD28,CD4,CD86,CNTNAP2,ITGA4,ITGAM,LRRC4C,NRXN1,NRXN3,SELPLG,SPN,VCAN
query_1	TRUE	2.48327e-05	413	364	26	0.0714286	0.062954	KEGG:05200	KEGG	Pathways in cancer	17860	453	KEGG:00000	KEGG,KEGG,KEGG,KEGG,KEGG,KEGG,KEGG,KEGG,KEGG,KEGG,KEGG,KEGG,KEGG,KEGG,KEGG,KEGG,KEGG,KEGG,KEGG,KEGG,KEGG,KEGG,KEGG,KEGG,KEGG,KEGG	ADCY7,AXIN2,CAMK2D,CCND2,CDK6,CSF1R,EDNRA,FASLG,FGFR1,FZD2,FZD7,GLI3,GNB4,GNG2,IL2RB,LAMA4,LEF1,LPAR5,MMP2,PGF,PLCB4,RAC2,RUNX1,SPI1,TGFB3,WNT5B
query_1	TRUE	2.48327e-05	129	364	14	0.0384615	0.108527	KEGG:04310	KEGG	Wnt signaling pathway	17860	299	KEGG:00000	KEGG,KEGG,KEGG,KEGG,KEGG,KEGG,KEGG,KEGG,KEGG,KEGG,KEGG,KEGG,KEGG,KEGG	AXIN2,CAMK2D,CCND2,FZD2,FZD7,LEF1,LGR6,NFATC4,PLCB4,PRICKLE1,RAC2,SERPINF1,VANGL2,WNT5B
query_1	TRUE	0.000148961	32	364	7	0.0192308	0.21875	KEGG:05150	KEGG	Staphylococcus aureus infection	17860	439	KEGG:00000	KEGG,KEGG,KEGG,KEGG,KEGG,KEGG,KEGG	C1QB,C1S,C3AR1,FCGR2A,IL10,ITGAM,SELPLG
query_1	TRUE	0.000181585	48	364	8	0.021978	0.166667	KEGG:04640	KEGG	Hematopoietic cell lineage	17860	333	KEGG:00000	KEGG,KEGG,KEGG,KEGG,KEGG,KEGG,KEGG,KEGG	CD1D,CD33,CD36,CD4,CD7,CSF1R,ITGA4,ITGAM
query_1	TRUE	0.000181585	97	364	11	0.0302198	0.113402	KEGG:04611	KEGG	Platelet activation	17860	321	KEGG:00000	KEGG,KEGG,KEGG,KEGG,KEGG,KEGG,KEGG,KEGG,KEGG,KEGG,KEGG	ADCY7,APBB1IP,COL1A2,COL3A1,FCGR2A,FERMT3,FYN,LCP2,PLCB4,TBXAS1,VWF
query_1	TRUE	0.000329956	69	364	9	0.0247253	0.130435	KEGG:04650	KEGG	Natural killer cell mediated cytotoxicity	17860	334	KEGG:00000	KEGG,KEGG,KEGG,KEGG,KEGG,KEGG,KEGG,KEGG,KEGG	CD244,CD48,FASLG,FYN,HCST,LAT2,LCP2,RAC2,ZAP70
query_1	TRUE	0.000578751	135	364	12	0.032967	0.0888889	KEGG:05202	KEGG	Transcriptional misregulation in cancer	17860	454	KEGG:00000	KEGG,KEGG,KEGG,KEGG,KEGG,KEGG,KEGG,KEGG,KEGG,KEGG,KEGG,KEGG	CCND2,CD86,CSF1R,ETV1,ETV5,HOXA10,IL2RB,ITGAM,MEIS1,RUNX1,SPI1,TCF3
query_1	TRUE	0.000645983	260	364	17	0.0467033	0.0653846	KEGG:04151	KEGG	PI3K-Akt signaling pathway	17860	285	KEGG:00000	KEGG,KEGG,KEGG,KEGG,KEGG,KEGG,KEGG,KEGG,KEGG,KEGG,KEGG,KEGG,KEGG,KEGG,KEGG,KEGG,KEGG	BRCA1,CCND2,CDK6,COL1A2,COL6A3,CSF1R,EFNA4,FASLG,FGFR1,GNB4,GNG2,IL2RB,ITGA4,LAMA4,LPAR5,PGF,VWF
query_1	TRUE	0.000733075	20	364	5	0.0137363	0.25	KEGG:05143	KEGG	African trypanosomiasis	17860	435	KEGG:00000	KEGG,KEGG,KEGG,KEGG,KEGG	FASLG,IL10,LAMA4,PLCB4,TLR9
query_1	TRUE	0.000733075	122	364	11	0.0302198	0.0901639	KEGG:05135	KEGG	Yersinia infection	17860	432	KEGG:00000	KEGG,KEGG,KEGG,KEGG,KEGG,KEGG,KEGG,KEGG,KEGG,KEGG,KEGG	CD4,FCGR2A,IL10,ITGA4,LCP2,LIMK1,NLRC4,PYCARD,RAC2,WIPF1,ZAP70
query_1	TRUE	0.000733075	46	364	7	0.0192308	0.152174	KEGG:05416	KEGG	Viral myocarditis	17860	493	KEGG:00000	KEGG,KEGG,KEGG,KEGG,KEGG,KEGG,KEGG	CD28,CD86,DTNA,FYN,RAC2,SGCD,SSPN
query_1	TRUE	0.000733075	122	364	11	0.0302198	0.0901639	KEGG:04060	KEGG	Cytokine-cytokine receptor interaction	17860	253	KEGG:00000	KEGG,KEGG,KEGG,KEGG,KEGG,KEGG,KEGG,KEGG,KEGG,KEGG,KEGG	CCR2,CD4,CSF1R,FASLG,IL10,IL2RB,IL34,INHBA,TGFB3,TNFRSF19,TNFSF13B
query_1	TRUE	0.000937636	66	364	8	0.021978	0.121212	KEGG:05146	KEGG	Amoebiasis	17860	438	KEGG:00000	KEGG,KEGG,KEGG,KEGG,KEGG,KEGG,KEGG,KEGG	CD1D,COL1A2,COL3A1,IL10,ITGAM,LAMA4,PLCB4,TGFB3
query_1	TRUE	0.00132382	23	364	5	0.0137363	0.217391	KEGG:04672	KEGG	Intestinal immune network for IgA production	17860	344	KEGG:00000	KEGG,KEGG,KEGG,KEGG,KEGG	CD28,CD86,IL10,ITGA4,TNFSF13B
query_1	TRUE	0.00143635	158	364	12	0.032967	0.0759494	KEGG:04360	KEGG	Axon guidance	17860	305	KEGG:00000	KEGG,KEGG,KEGG,KEGG,KEGG,KEGG,KEGG,KEGG,KEGG,KEGG,KEGG,KEGG	BOC,CAMK2D,EFNA4,EPHA3,FYN,LIMK1,LRRC4C,NFATC4,PLXNC1,RAC2,RGMA,WNT5B
query_1	TRUE	0.0025666	15	364	4	0.010989	0.266667	KEGG:05330	KEGG	Allograft rejection	17860	486	KEGG:00000	KEGG,KEGG,KEGG,KEGG	CD28,CD86,FASLG,IL10
query_1	TRUE	0.0025666	170	364	12	0.032967	0.0705882	KEGG:04015	KEGG	Rap1 signaling pathway	17860	248	KEGG:00000	KEGG,KEGG,KEGG,KEGG,KEGG,KEGG,KEGG,KEGG,KEGG,KEGG,KEGG,KEGG	ADCY7,APBB1IP,CSF1R,EFNA4,EVL,FGFR1,ITGAM,LCP2,LPAR5,PGF,PLCB4,RAC2
query_1	TRUE	0.0036603	64	364	7	0.0192308	0.109375	KEGG:04512	KEGG	ECM-receptor interaction	17860	314	KEGG:00000	KEGG,KEGG,KEGG,KEGG,KEGG,KEGG,KEGG	CD36,COL1A2,COL6A3,ITGA4,LAMA4,SV2A,VWF
query_1	TRUE	0.0036603	31	364	5	0.0137363	0.16129	KEGG:04061	KEGG	Viral protein interaction with cytokine and cytokine receptor	17860	254	KEGG:00000	KEGG,KEGG,KEGG,KEGG,KEGG	CCR2,CSF1R,IL10,IL2RB,IL34
query_1	TRUE	0.0036603	84	364	8	0.021978	0.0952381	KEGG:04350	KEGG	TGF-beta signaling pathway	17860	304	KEGG:00000	KEGG,KEGG,KEGG,KEGG,KEGG,KEGG,KEGG,KEGG	DCN,EMP3,FBN1,FMOD,INHBA,NBL1,RGMA,TGFB3
query_1	TRUE	0.0036603	17	364	4	0.010989	0.235294	KEGG:05320	KEGG	Autoimmune thyroid disease	17860	482	KEGG:00000	KEGG,KEGG,KEGG,KEGG	CD28,CD86,FASLG,IL10
query_1	TRUE	0.0036603	65	364	7	0.0192308	0.107692	KEGG:05322	KEGG	Systemic lupus erythematosus	17860	484	KEGG:00000	KEGG,KEGG,KEGG,KEGG,KEGG,KEGG,KEGG	C1QB,C1S,CD28,CD86,FCGR2A,HIST1H2BJ,IL10
query_1	TRUE	0.0036603	66	364	7	0.0192308	0.106061	KEGG:05412	KEGG	Arrhythmogenic right ventricular cardiomyopathy	17860	490	KEGG:00000	KEGG,KEGG,KEGG,KEGG,KEGG,KEGG,KEGG	CACNB3,DTNA,GJA1,ITGA4,LEF1,SGCD,SSPN
query_1	TRUE	0.0036603	47	364	6	0.0164835	0.12766	KEGG:05217	KEGG	Basal cell carcinoma	17860	468	KEGG:00000	KEGG,KEGG,KEGG,KEGG,KEGG,KEGG	AXIN2,FZD2,FZD7,GLI3,LEF1,WNT5B
query_1	TRUE	0.00424647	112	364	9	0.0247253	0.0803571	KEGG:04613	KEGG	Neutrophil extracellular trap formation	17860	323	KEGG:00000	KEGG,KEGG,KEGG,KEGG,KEGG,KEGG,KEGG,KEGG,KEGG	FCGR2A,HDAC9,HIST1H2BJ,ITGAM,PLCB4,RAC2,SELPLG,SIGLEC9,VWF
query_1	TRUE	0.00424647	112	364	9	0.0247253	0.0803571	KEGG:04934	KEGG	Cushing syndrome	17860	391	KEGG:00000	KEGG,KEGG,KEGG,KEGG,KEGG,KEGG,KEGG,KEGG,KEGG	ADCY7,AXIN2,CAMK2D,CDK6,FZD2,FZD7,LEF1,PLCB4,WNT5B
query_1	TRUE	0.00774456	76	364	7	0.0192308	0.0921053	KEGG:04916	KEGG	Melanogenesis	17860	373	KEGG:00000	KEGG,KEGG,KEGG,KEGG,KEGG,KEGG,KEGG	ADCY7,CAMK2D,FZD2,FZD7,LEF1,PLCB4,WNT5B
query_1	TRUE	0.00775635	124	364	9	0.0247253	0.0725806	KEGG:04390	KEGG	Hippo signaling pathway	17860	310	KEGG:00000	KEGG,KEGG,KEGG,KEGG,KEGG,KEGG,KEGG,KEGG,KEGG	AXIN2,CCND2,FRMD6,FZD2,FZD7,LEF1,TEAD2,TGFB3,WNT5B
query_1	TRUE	0.00775635	124	364	9	0.0247253	0.0725806	KEGG:05152	KEGG	Tuberculosis	17860	440	KEGG:00000	KEGG,KEGG,KEGG,KEGG,KEGG,KEGG,KEGG,KEGG,KEGG	CAMK2D,FCGR2A,IL10,ITGAM,LSP1,NOD2,TGFB3,TLR6,TLR9
query_1	TRUE	0.00775635	77	364	7	0.0192308	0.0909091	KEGG:05414	KEGG	Dilated cardiomyopathy	17860	491	KEGG:00000	KEGG,KEGG,KEGG,KEGG,KEGG,KEGG,KEGG	ADCY7,CACNB3,DTNA,ITGA4,SGCD,SSPN,TGFB3
query_1	TRUE	0.00856724	79	364	7	0.0192308	0.0886076	KEGG:05142	KEGG	Chagas disease	17860	434	KEGG:00000	KEGG,KEGG,KEGG,KEGG,KEGG,KEGG,KEGG	C1QB,FASLG,IL10,PLCB4,TGFB3,TLR6,TLR9
query_1	TRUE	0.0089274	103	364	8	0.021978	0.0776699	KEGG:04550	KEGG	Signaling pathways regulating pluripotency of stem cells	17860	319	KEGG:00000	KEGG,KEGG,KEGG,KEGG,KEGG,KEGG,KEGG,KEGG	AXIN2,FGFR1,FZD2,FZD7,INHBA,MEIS1,TCF3,WNT5B
query_1	TRUE	0.00923184	104	364	8	0.021978	0.0769231	KEGG:04926	KEGG	Relaxin signaling pathway	17860	383	KEGG:00000	KEGG,KEGG,KEGG,KEGG,KEGG,KEGG,KEGG,KEGG	ACTA2,ADCY7,COL1A2,COL3A1,GNB4,GNG2,MMP2,PLCB4
query_1	TRUE	0.0110032	159	364	10	0.0274725	0.0628931	KEGG:05206	KEGG	MicroRNAs in cancer	17860	458	KEGG:00000	KEGG,KEGG,KEGG,KEGG,KEGG,KEGG,KEGG,KEGG,KEGG,KEGG	BMF,BRCA1,CCND2,CDC25C,CDCA5,CDK6,EFNA4,MIR125B1,STMN1,VIM
query_1	TRUE	0.0125057	110	364	8	0.021978	0.0727273	KEGG:05224	KEGG	Breast cancer	17860	475	KEGG:00000	KEGG,KEGG,KEGG,KEGG,KEGG,KEGG,KEGG,KEGG	AXIN2,BRCA1,CDK6,FGFR1,FZD2,FZD7,LEF1,WNT5B
query_1	TRUE	0.0154628	28	364	4	0.010989	0.142857	KEGG:05144	KEGG	Malaria	17860	436	KEGG:00000	KEGG,KEGG,KEGG,KEGG	CD36,IL10,TGFB3,TLR9
query_1	TRUE	0.0157085	257	364	13	0.0357143	0.0505837	KEGG:05165	KEGG	Human papillomavirus infection	17860	446	KEGG:00000	KEGG,KEGG,KEGG,KEGG,KEGG,KEGG,KEGG,KEGG,KEGG,KEGG,KEGG,KEGG,KEGG	AXIN2,CCND2,CDK6,COL1A2,COL6A3,FASLG,FZD2,FZD7,IKBKE,ITGA4,LAMA4,VWF,WNT5B
query_1	TRUE	0.0160977	14	364	3	0.00824176	0.214286	KEGG:05332	KEGG	Graft-versus-host disease	17860	487	KEGG:00000	KEGG,KEGG,KEGG	CD28,CD86,FASLG
query_1	TRUE	0.0164916	171	364	10	0.0274725	0.0584795	KEGG:05205	KEGG	Proteoglycans in cancer	17860	457	KEGG:00000	KEGG,KEGG,KEGG,KEGG,KEGG,KEGG,KEGG,KEGG,KEGG,KEGG	CAMK2D,COL1A2,DCN,FASLG,FGFR1,FZD2,FZD7,LUM,MMP2,WNT5B
query_1	TRUE	0.0181042	49	364	5	0.0137363	0.102041	KEGG:04340	KEGG	Hedgehog signaling pathway	17860	302	KEGG:00000	KEGG,KEGG,KEGG,KEGG,KEGG	BOC,CCND2,CDON,GLI3,GPR161
query_1	TRUE	0.0181042	49	364	5	0.0137363	0.102041	KEGG:04610	KEGG	Complement and coagulation cascades	17860	320	KEGG:00000	KEGG,KEGG,KEGG,KEGG,KEGG	C1QB,C1S,C3AR1,ITGAM,VWF
query_1	TRUE	0.0181687	71	364	6	0.0164835	0.084507	KEGG:05410	KEGG	Hypertrophic cardiomyopathy	17860	489	KEGG:00000	KEGG,KEGG,KEGG,KEGG,KEGG,KEGG	CACNB3,DTNA,ITGA4,SGCD,SSPN,TGFB3
query_1	TRUE	0.0181687	95	364	7	0.0192308	0.0736842	KEGG:04660	KEGG	T cell receptor signaling pathway	17860	338	KEGG:00000	KEGG,KEGG,KEGG,KEGG,KEGG,KEGG,KEGG	CD28,CD4,FYN,GRAP2,IL10,LCP2,ZAP70
query_1	TRUE	0.0184955	50	364	5	0.0137363	0.1	KEGG:05140	KEGG	Leishmaniasis	17860	433	KEGG:00000	KEGG,KEGG,KEGG,KEGG,KEGG	FCGR2A,IL10,ITGA4,ITGAM,TGFB3
query_1	TRUE	0.0197405	51	364	5	0.0137363	0.0980392	KEGG:05133	KEGG	Pertussis	17860	430	KEGG:00000	KEGG,KEGG,KEGG,KEGG,KEGG	C1QB,C1S,IL10,ITGAM,PYCARD
query_1	TRUE	0.0202564	240	364	12	0.032967	0.05	KEGG:04010	KEGG	MAPK signaling pathway	17860	243	KEGG:00000	KEGG,KEGG,KEGG,KEGG,KEGG,KEGG,KEGG,KEGG,KEGG,KEGG,KEGG,KEGG	CACNB3,CSF1R,DUSP10,EFNA4,FASLG,FGFR1,MAP3K12,PGF,PTPN7,RAC2,STMN1,TGFB3
query_1	TRUE	0.0209841	99	364	7	0.0192308	0.0707071	KEGG:05162	KEGG	Measles	17860	443	KEGG:00000	KEGG,KEGG,KEGG,KEGG,KEGG,KEGG,KEGG	CCND2,CD28,CDK6,FASLG,IKBKE,IL2RB,TLR9
query_1	TRUE	0.021456	126	364	8	0.021978	0.0634921	KEGG:04621	KEGG	NOD-like receptor signaling pathway	17860	326	KEGG:00000	KEGG,KEGG,KEGG,KEGG,KEGG,KEGG,KEGG,KEGG	GBP5,IFI16,IKBKE,NLRC4,NOD2,P2RX7,PLCB4,PYCARD
query_1	TRUE	0.0221471	76	364	6	0.0164835	0.0789474	KEGG:04725	KEGG	Cholinergic synapse	17860	355	KEGG:00000	KEGG,KEGG,KEGG,KEGG,KEGG,KEGG	ADCY7,CAMK2D,FYN,GNB4,GNG2,PLCB4
query_1	TRUE	0.0261338	18	364	3	0.00824176	0.166667	KEGG:04940	KEGG	Type I diabetes mellitus	17860	394	KEGG:00000	KEGG,KEGG,KEGG	CD28,CD86,FASLG
query_1	TRUE	0.0262117	56	364	5	0.0137363	0.0892857	KEGG:05221	KEGG	Acute myeloid leukemia	17860	472	KEGG:00000	KEGG,KEGG,KEGG,KEGG,KEGG	CSF1R,ITGAM,LEF1,RUNX1,SPI1
query_1	TRUE	0.0302695	164	364	9	0.0247253	0.054878	KEGG:05170	KEGG	Human immunodeficiency virus 1 infection	17860	451	KEGG:00000	KEGG,KEGG,KEGG,KEGG,KEGG,KEGG,KEGG,KEGG,KEGG	APOBEC3C,CD4,CDC25C,FASLG,GNB4,GNG2,LIMK1,NFATC4,RAC2
query_1	TRUE	0.0363565	140	364	8	0.021978	0.0571429	KEGG:04110	KEGG	Cell cycle	17860	264	KEGG:00000	KEGG,KEGG,KEGG,KEGG,KEGG,KEGG,KEGG,KEGG	CCND2,CDC25C,CDCA5,CDK6,PTTG1,TGFB3,TRIP13,TTK
query_1	TRUE	0.0379602	171	364	9	0.0247253	0.0526316	KEGG:04510	KEGG	Focal adhesion	17860	313	KEGG:00000	KEGG,KEGG,KEGG,KEGG,KEGG,KEGG,KEGG,KEGG,KEGG	CCND2,COL1A2,COL6A3,FYN,ITGA4,LAMA4,PGF,RAC2,VWF
query_1	TRUE	0.03997	63	364	5	0.0137363	0.0793651	KEGG:04974	KEGG	Protein digestion and absorption	17860	405	KEGG:00000	KEGG,KEGG,KEGG,KEGG,KEGG	COL1A2,COL3A1,COL5A1,COL5A2,COL6A3
query_1	TRUE	0.042161	145	364	8	0.021978	0.0551724	KEGG:05167	KEGG	Kaposi sarcoma-associated herpesvirus infection	17860	448	KEGG:00000	KEGG,KEGG,KEGG,KEGG,KEGG,KEGG,KEGG,KEGG	CD86,CDK6,CLEC2B,GNB4,GNG2,IKBKE,LEF1,NFATC4
query_1	TRUE	0.0461318	178	364	9	0.0247253	0.0505618	KEGG:05166	KEGG	Human T-cell leukemia virus 1 infection	17860	447	KEGG:00000	KEGG,KEGG,KEGG,KEGG,KEGG,KEGG,KEGG,KEGG,KEGG	ADCY7,CCND2,CD4,IL2RB,NFATC4,PTTG1,SPI1,TCF3,TGFB3
query_1	TRUE	0.0469368	179	364	9	0.0247253	0.0502793	KEGG:04014	KEGG	Ras signaling pathway	17860	247	KEGG:00000	KEGG,KEGG,KEGG,KEGG,KEGG,KEGG,KEGG,KEGG,KEGG	CSF1R,EFNA4,FASLG,FGFR1,GNB4,GNG2,PGF,RAC2,ZAP70
KEGG analysis Down-Hyper
query	significant	p_value	term_size	query_size	intersection_size	precision	recall	term_id	source	term_name	effective_domain_size	source_order	parents	evidence_codes	intersection
query_1	TRUE	4.56752e-19	1199	522	99	0.189655	0.0825688	KEGG:01100	KEGG	Metabolic pathways	17860	181	KEGG:00000	KEGG,KEGG,KEGG,KEGG,KEGG,KEGG,KEGG,KEGG,KEGG,KEGG,KEGG,KEGG,KEGG,KEGG,KEGG,KEGG,KEGG,KEGG,KEGG,KEGG,KEGG,KEGG,KEGG,KEGG,KEGG,KEGG,KEGG,KEGG,KEGG,KEGG,KEGG,KEGG,KEGG,KEGG,KEGG,KEGG,KEGG,KEGG,KEGG,KEGG,KEGG,KEGG,KEGG,KEGG,KEGG,KEGG,KEGG,KEGG,KEGG,KEGG,KEGG,KEGG,KEGG,KEGG,KEGG,KEGG,KEGG,KEGG,KEGG,KEGG,KEGG,KEGG,KEGG,KEGG,KEGG,KEGG,KEGG,KEGG,KEGG,KEGG,KEGG,KEGG,KEGG,KEGG,KEGG,KEGG,KEGG,KEGG,KEGG,KEGG…	A4GALT,ACADL,ACMSD,ACOT4,ACSL1,ACSS2,ACY1,ADH6,AGMAT,AGPAT3,AGXT2,ALAD,ALDH1B1,ALDH2,ALDH3B1,ALDH4A1,ALDH8A1,ALPL,AMT,ARSA,ASPA,ASS1,ATP6V0A4,ATP6V0B,B3GNT2,BHMT,BHMT2,CDS1,CHDH,CKB,CKMT2,CMBL,CNDP2,COX5A,COX7A1,CYP8B1,DDC,DHCR24,DMGDH,DPYS,EHHADH,ELOVL7,ENO1,ENPP6,ENTPD2,ENTPD5,EPHX2,ETNK2,FBP1,FMO1,FMO2,FUT6,GAL3ST1,GALE,GALK1,GALNT11,GALNT14,GCNT2,GGT6,GLYCTK,GMPR,GPT,GPX3,HAO2,HGD,HIBADH,HMGC…
query_1	TRUE	0.000160083	9	522	5	0.00957854	0.555556	KEGG:04950	KEGG	Maturity onset diabetes of the young	17860	395	KEGG:00000	KEGG,KEGG,KEGG,KEGG,KEGG	HNF1A,HNF1B,HNF4A,PKLR,SLC2A2
query_1	TRUE	0.000160083	42	522	9	0.0172414	0.214286	KEGG:00330	KEGG	Arginine and proline metabolism	17860	36	KEGG:00000	KEGG,KEGG,KEGG,KEGG,KEGG,KEGG,KEGG,KEGG,KEGG	AGMAT,ALDH1B1,ALDH2,ALDH4A1,CKB,CKMT2,CNDP2,HOGA1,NOS3
query_1	TRUE	0.000160083	41	522	9	0.0172414	0.219512	KEGG:04978	KEGG	Mineral absorption	17860	409	KEGG:00000	KEGG,KEGG,KEGG,KEGG,KEGG,KEGG,KEGG,KEGG,KEGG	ATP1A1,FXYD2,MT1E,MT1X,SLC34A1,SLC34A3,SLC39A4,SLC6A19,TRPV6
query_1	TRUE	0.000183922	16	522	6	0.0114943	0.375	KEGG:00340	KEGG	Histidine metabolism	17860	40	KEGG:00000	KEGG,KEGG,KEGG,KEGG,KEGG,KEGG	ALDH1B1,ALDH2,ALDH3B1,ASPA,CNDP2,HNMT
query_1	TRUE	0.00116358	55	522	9	0.0172414	0.163636	KEGG:03320	KEGG	PPAR signaling pathway	17860	236	KEGG:00000	KEGG,KEGG,KEGG,KEGG,KEGG,KEGG,KEGG,KEGG,KEGG	ACADL,ACSL1,CPT1A,CYP8B1,EHHADH,FABP1,HMGCS2,ME3,PPARA
query_1	TRUE	0.00126929	100	522	12	0.0229885	0.12	KEGG:01200	KEGG	Carbon metabolism	17860	184	KEGG:00000	KEGG,KEGG,KEGG,KEGG,KEGG,KEGG,KEGG,KEGG,KEGG,KEGG,KEGG,KEGG	ACSS2,AMT,ENO1,FBP1,GLYCTK,GPT,HAO2,IDH2,ME3,OGDH,PKLR,SDHB
query_1	TRUE	0.00136119	45	522	8	0.0153257	0.177778	KEGG:00561	KEGG	Glycerolipid metabolism	17860	85	KEGG:00000	KEGG,KEGG,KEGG,KEGG,KEGG,KEGG,KEGG,KEGG	AGPAT3,ALDH1B1,ALDH2,GLYCTK,LPIN3,MGLL,MOGAT1,MOGAT3
query_1	TRUE	0.00138466	34	522	7	0.01341	0.205882	KEGG:00260	KEGG	Glycine, serine and threonine metabolism	17860	28	KEGG:00000	KEGG,KEGG,KEGG,KEGG,KEGG,KEGG,KEGG	AGXT2,AMT,BHMT,CHDH,DMGDH,GLYCTK,SARDH
query_1	TRUE	0.00157136	16	522	5	0.00957854	0.3125	KEGG:00053	KEGG	Ascorbate and aldarate metabolism	17860	8	KEGG:00000	KEGG,KEGG,KEGG,KEGG,KEGG	ALDH1B1,ALDH2,KL,MIOX,UGT1A6
query_1	TRUE	0.00157136	48	522	8	0.0153257	0.166667	KEGG:00010	KEGG	Glycolysis / Gluconeogenesis	17860	2	KEGG:00000	KEGG,KEGG,KEGG,KEGG,KEGG,KEGG,KEGG,KEGG	ACSS2,ADH6,ALDH1B1,ALDH2,ALDH3B1,ENO1,FBP1,PKLR
query_1	TRUE	0.00157136	36	522	7	0.01341	0.194444	KEGG:00071	KEGG	Fatty acid degradation	17860	11	KEGG:00000	KEGG,KEGG,KEGG,KEGG,KEGG,KEGG,KEGG	ACADL,ACSL1,ADH6,ALDH1B1,ALDH2,CPT1A,EHHADH
query_1	TRUE	0.00221572	27	522	6	0.0114943	0.222222	KEGG:04960	KEGG	Aldosterone-regulated sodium reabsorption	17860	396	KEGG:00000	KEGG,KEGG,KEGG,KEGG,KEGG,KEGG	ATP1A1,FXYD2,KCNJ1,NEDD4L,NR3C2,SCNN1A
query_1	TRUE	0.0025675	28	522	6	0.0114943	0.214286	KEGG:00410	KEGG	beta-Alanine metabolism	17860	55	KEGG:00000	KEGG,KEGG,KEGG,KEGG,KEGG,KEGG	ALDH1B1,ALDH2,ALDH3B1,CNDP2,DPYS,EHHADH
query_1	TRUE	0.00260667	133	522	13	0.0249042	0.0977444	KEGG:04530	KEGG	Tight junction	17860	317	KEGG:00000	KEGG,KEGG,KEGG,KEGG,KEGG,KEGG,KEGG,KEGG,KEGG,KEGG,KEGG,KEGG,KEGG	CGN,CGNL1,CLDN10,CLDN19,CLDN8,CRB3,ERBB2,EZR,LLGL2,MYL9,NEDD4L,OCLN,PARD6B
query_1	TRUE	0.00358406	56	522	8	0.0153257	0.142857	KEGG:04976	KEGG	Bile secretion	17860	407	KEGG:00000	KEGG,KEGG,KEGG,KEGG,KEGG,KEGG,KEGG,KEGG	ATP1A1,FXYD2,NR0B2,SLC22A7,SLC22A8,SLC4A4,SLC51B,UGT1A6
query_1	TRUE	0.00466081	32	522	6	0.0114943	0.1875	KEGG:00380	KEGG	Tryptophan metabolism	17860	48	KEGG:00000	KEGG,KEGG,KEGG,KEGG,KEGG,KEGG	ACMSD,ALDH1B1,ALDH2,ALDH8A1,DDC,EHHADH
query_1	TRUE	0.00899079	81	522	9	0.0172414	0.111111	KEGG:04670	KEGG	Leukocyte transendothelial migration	17860	343	KEGG:00000	KEGG,KEGG,KEGG,KEGG,KEGG,KEGG,KEGG,KEGG,KEGG	BCAR1,CLDN10,CLDN19,CLDN8,EZR,MYL9,OCLN,PLCG2,VAV3
query_1	TRUE	0.0110182	38	522	6	0.0114943	0.157895	KEGG:00620	KEGG	Pyruvate metabolism	17860	99	KEGG:00000	KEGG,KEGG,KEGG,KEGG,KEGG,KEGG	ACSS2,ADH6,ALDH1B1,ALDH2,ME3,PKLR
query_1	TRUE	0.0120254	103	522	10	0.0191571	0.0970874	KEGG:04936	KEGG	Alcoholic liver disease	17860	393	KEGG:00000	KEGG,KEGG,KEGG,KEGG,KEGG,KEGG,KEGG,KEGG,KEGG,KEGG	ADH6,ALDH1B1,ALDH2,CPT1A,FABP1,LPIN3,MAP2K3,PPARA,PPARGC1A,TICAM1
query_1	TRUE	0.0143338	28	522	5	0.00957854	0.178571	KEGG:01210	KEGG	2-Oxocarboxylic acid metabolism	17860	185	KEGG:00000	KEGG,KEGG,KEGG,KEGG,KEGG	ACY1,AGXT2,GPT,IDH2,OGDH
query_1	TRUE	0.0143338	28	522	5	0.00957854	0.178571	KEGG:00630	KEGG	Glyoxylate and dicarboxylate metabolism	17860	107	KEGG:00000	KEGG,KEGG,KEGG,KEGG,KEGG	ACSS2,AMT,GLYCTK,HAO2,HOGA1
query_1	TRUE	0.0143338	56	522	7	0.01341	0.125	KEGG:04971	KEGG	Gastric acid secretion	17860	402	KEGG:00000	KEGG,KEGG,KEGG,KEGG,KEGG,KEGG,KEGG	ATP1A1,EZR,KCNJ1,KCNJ10,KCNJ15,KCNJ16,KCNQ1
query_1	TRUE	0.0148089	17	522	4	0.00766284	0.235294	KEGG:00601	KEGG	Glycosphingolipid biosynthesis - lacto and neolacto series	17860	96	KEGG:00000	KEGG,KEGG,KEGG,KEGG	A4GALT,B3GNT2,FUT6,GCNT2
query_1	TRUE	0.016548	43	522	6	0.0114943	0.139535	KEGG:00280	KEGG	Valine, leucine and isoleucine degradation	17860	31	KEGG:00000	KEGG,KEGG,KEGG,KEGG,KEGG,KEGG	AGXT2,ALDH1B1,ALDH2,EHHADH,HIBADH,HMGCS2
query_1	TRUE	0.0172256	18	522	4	0.00766284	0.222222	KEGG:00220	KEGG	Arginine biosynthesis	17860	21	KEGG:00000	KEGG,KEGG,KEGG,KEGG	ACY1,ASS1,GPT,NOS3
query_1	TRUE	0.0203381	61	522	7	0.01341	0.114754	KEGG:01230	KEGG	Biosynthesis of amino acids	17860	188	KEGG:00000	KEGG,KEGG,KEGG,KEGG,KEGG,KEGG,KEGG	ACY1,ASS1,ENO1,GPT,IDH2,PAH,PKLR
query_1	TRUE	0.0219715	63	522	7	0.01341	0.111111	KEGG:04974	KEGG	Protein digestion and absorption	17860	405	KEGG:00000	KEGG,KEGG,KEGG,KEGG,KEGG,KEGG,KEGG	ATP1A1,FXYD2,KCNJ13,KCNQ1,SLC3A1,SLC6A19,SLC7A9
query_1	TRUE	0.0219715	32	522	5	0.00957854	0.15625	KEGG:00250	KEGG	Alanine, aspartate and glutamate metabolism	17860	25	KEGG:00000	KEGG,KEGG,KEGG,KEGG,KEGG	AGXT2,ALDH4A1,ASPA,ASS1,GPT
query_1	TRUE	0.0219715	20	522	4	0.00766284	0.2	KEGG:00770	KEGG	Pantothenate and CoA biosynthesis	17860	122	KEGG:00000	KEGG,KEGG,KEGG,KEGG	ALDH1B1,ALDH2,DPYS,PANK1
query_1	TRUE	0.0219715	20	522	4	0.00766284	0.2	KEGG:00350	KEGG	Tyrosine metabolism	17860	41	KEGG:00000	KEGG,KEGG,KEGG,KEGG	ADH6,ALDH3B1,DDC,HGD
query_1	TRUE	0.0223287	33	522	5	0.00957854	0.151515	KEGG:00982	KEGG	Drug metabolism - cytochrome P450	17860	156	KEGG:00000	KEGG,KEGG,KEGG,KEGG,KEGG	ADH6,ALDH3B1,FMO1,FMO2,UGT1A6
query_1	TRUE	0.024335	21	522	4	0.00766284	0.190476	KEGG:04975	KEGG	Fat digestion and absorption	17860	406	KEGG:00000	KEGG,KEGG,KEGG,KEGG	FABP1,MOGAT3,NPC1L1,PLA2G12B
query_1	TRUE	0.024335	49	522	6	0.0114943	0.122449	KEGG:04610	KEGG	Complement and coagulation cascades	17860	320	KEGG:00000	KEGG,KEGG,KEGG,KEGG,KEGG,KEGG	F11,KLKB1,KNG1,PROC,SERPINA1,SERPINA5
query_1	TRUE	0.0278822	11	522	3	0.00574713	0.272727	KEGG:00360	KEGG	Phenylalanine metabolism	17860	42	KEGG:00000	KEGG,KEGG,KEGG	ALDH3B1,DDC,PAH
query_1	TRUE	0.0450203	13	522	3	0.00574713	0.230769	KEGG:00430	KEGG	Taurine and hypotaurine metabolism	17860	56	KEGG:00000	KEGG,KEGG,KEGG	FMO1,FMO2,GGT6
