# Supplementary material for: Novel epigenetic signature, molecular subtypes and insights into IGF2/H19 dysregulation in Wilms tumour revealed by methylomic and transcriptomic profiling
Source: Research Square preprint supplement (doi:10.21203/rs.3.rs-8030860/v1), 2025-11-11
Supplement: Supplementary file 9 [file cb946409b4ae90952e5a8c89.xlsx]

## Sheet: Table S5_KEGG enrich Mol subgr
## IC1-GOM specific DMS Enrichment
id	genome_fraction	observed_region_hits	fold_enrichment	p_value	p_adjust	mean_tss_dist	observed_gene_hits	gene_set_size	fold_enrichment_hyper	p_value_hyper	p_adjust_hyper
MATURITY_ONSET_DIABETES_OF_THE_YOUNG	0.00357012	37	1.93427	0.000180826	0.0189705	138320	16	25	2.37528	0.000113879	0.00423628
CELL_ADHESION_MOLECULES_CAMS	0.0198891	144	1.35128	0.000281067	0.0189705	282487	50	114	1.62779	7.14409e-05	0.003322
TIGHT_JUNCTION	0.0151537	114	1.40405	0.000305975	0.0189705	143050	60	131	1.69986	2.66636e-06	0.000494356
ALDOSTERONE_REGULATED_SODIUM_REABSORPTION	0.00547959	48	1.6349	0.000941674	0.0328208	171769	20	42	1.76732	0.00327837	0.0457691
JAK_STAT_SIGNALING_PATHWAY	0.0134826	100	1.38428	0.00105874	0.0328208	151851	61	150	1.50929	0.0001763	0.00546531
ADHERENS_JUNCTION	0.0110832	78	1.31349	0.0113488	0.13193	122495	32	72	1.6495	0.00102649	0.017357
NEUROACTIVE_LIGAND_RECEPTOR_INTERACTION	0.0258343	165	1.19202	0.0140691	0.152293	146951	92	267	1.27882	0.00390095	0.0457691
O_GLYCAN_BIOSYNTHESIS	0.00453877	32	1.31586	0.0766689	0.491738	119946	17	30	2.10311	0.000559109	0.0103994
LEUKOCYTE_TRANSENDOTHELIAL_MIGRATION	0.0128803	81	1.1737	0.0845174	0.494946	128574	53	115	1.71046	7.97349e-06	0.000494356
FOCAL_ADHESION	0.0251852	151	1.119	0.0891865	0.502688	119959	75	197	1.41296	0.000403172	0.00937376
TYPE_II_DIABETES_MELLITUS	0.00677511	39	1.07435	0.348336	0.933798	183339	24	46	1.93637	0.000242145	0.00643414
AXON_GUIDANCE	0.016472	90	1.01975	0.44023	1	170993	49	129	1.40974	0.00393712	0.0457691
MELANOGENESIS	0.0136673	74	1.01052	0.479697	1	138937	43	101	1.58009	0.000484501	0.010013
PATHWAYS_IN_CANCER	0.0415583	223	1.00149	0.500448	1	143380	123	323	1.41331	7.04371e-06	0.000494356
CALCIUM_SIGNALING_PATHWAY	0.0201117	106	0.983682	0.581172	1	188325	64	176	1.34959	0.00373963	0.0457691
MAPK_SIGNALING_PATHWAY	0.0299036	144	0.898744	0.911852	1	162863	92	261	1.30822	0.00183438	0.0284329
## LOH specific DMS Enrichment
id	genome_fraction	observed_region_hits	fold_enrichment	p_value	p_adjust	mean_tss_dist	observed_gene_hits	gene_set_size	fold_enrichment_hyper	p_value_hyper	p_adjust_hyper
GLYCOSAMINOGLYCAN_BIOSYNTHESIS_CHONDROITIN_SULFATE	0.00323784	12	2.50417	0.00387683	0.240364	254986	8	22	4.03504	0.000431675	0.0401458
HEDGEHOG_SIGNALING_PATHWAY	0.0090331	17	1.2716	0.191204	1	218222	14	56	2.77409	0.000342058	0.0401458
## norm11p15.5 specific DMS Enrichment
id	genome_fraction	observed_region_hits	fold_enrichment	p_value	p_adjust	mean_tss_dist	observed_gene_hits	gene_set_size	fold_enrichment_hyper	p_value_hyper	p_adjust_hyper
TYPE_I_DIABETES_MELLITUS	0.0106308	13	1.24401	0.252045	0.851917	408854	8	23	4.38138	0.000256967	0.0265156
GRAFT_VERSUS_HOST_DISEASE	0.00835153	9	1.09628	0.436799	0.965336	358344	7	20	4.40876	0.000603016	0.037387
ALLOGRAFT_REJECTION	0.00870854	9	1.05134	0.485534	0.965336	358344	7	18	4.89863	0.000285114	0.0265156
