# Supplementary material for: Novel epigenetic signature, molecular subtypes and insights into IGF2/H19 dysregulation in Wilms tumour revealed by methylomic and transcriptomic profiling
Source: Research Square preprint supplement (doi:10.21203/rs.3.rs-8030860/v1), 2025-11-11
Supplement: Supplementary file 10 [file d78bd21fcc96ed37e4e99f0e.xlsx]

## Sheet: Table S8_Subtype Template
Subtype_1	Subtype_2	Subtype_3
MMP7	MYBPC1	UNCX
PIGR	MYL1	PCDH15
COL4A3	MYH8	CDH7
PKHD1	ACTC1	FGF8
TACSTD2	DKK2	COL2A1
CDH16	TTN	HMGA2
C3	CASQ2	MEOX1
CMAHP	MYBPH	ETV4
CP	OSR2	TMSB15A
PDZK1IP1	GREM2	NKAIN3
MAOB	TNNT1	ELAVL4
MYH11	CHRNG	IGDCC3
AR	ACTA1	IGF2-AS
COBLL1	PRRX1	TICRR
COL4A4	PI15	LIN28B
EHF	RUNX1T1	CBX2
ADH1B	NNAT	DLGAP5
BHLHE41	CXCL14	NEK2
CRYAB	DPT	SOX11
ITIH5	CHRNA1	UBE2C
PRELP	CKM	ADAMTS20
STEAP4	MYOZ2	RCOR2
KCNJ16	PAX3	MCM10
FOSB	IGSF10	FBN3
CLDN1	TNNC1	CDCA2
HSPB8	CHRND	TTK
C1S	OGN	SLIT1
ESR1	MYOG	IGF2BP1
IL1RL1	SMYD1	SHISA2
SYNPO2	MYH7	DPYSL5
CHL1	SERPINF1	CDC25A
NNMT	MYO18B	KIF20A
ABCA8	KLHL41	UHRF1
HLF	MYOT	NKAIN1
MMP19	ZNF385D	TAGLN3
CPA3	LUM	KIFC1
ABI3BP	TMEM132C	BIRC5
AHR	ACTN2	MYBL2
OMD	MYL4	NRXN1
ACSM2A	UNC45B	AURKB
FGF7	XIRP2	GDNF
UGT2B7	MYH3	IGSF9
IGF1	PITX2	CDC20
SCIN	KERA	HJURP
SERPINA1	SLN	CCNB2
MME	DIO3OS	CA14
SFRP4	ELN	CDC25C
FIBIN	ANGPTL1	SIX2
PTGFR	BEST3	DEPDC1B
ADRA2A	LINC00632	NUF2
SLC22A3	APOL4	FSD1
HNF1B	IGF2BP3	CRABP2
FMO2	NEXN	KIF2C
MRGPRF	PAX7	TROAP
LTF	MFAP5	DCC
C4B	MYPN	ST8SIA2
TNFSF10	ALPK2	KIF4A
NFIX	MB	NCAPG
EVA1C	CACNA1S	EXO1
CLEC4M	APOBEC2	BUB1B
KRT7	WIF1	PBK
IL7R	TNNI2	LRTM2
MACC1	CAV3	KCNN1
PTH2R	TNNC2	DEPDC1
ADAMTS9-AS1	TNNT3	DUSP9
WSCD2	APOD	TRPM5
BIRC3	LGR5	FOXM1
IGHA1	MUSK	CLVS2
GULP1	EYA4	HOXB-AS3
ALDH1A1	LMOD3	KIF18B
PLSCR4	HSPB7	ECEL1
TPSAB1	MEGF10	PTTG1
RORC	SMPX	KIF15
MS4A2	EBF3	TUBB2B
NR1H4	GREM1	CDC45
F13A1	CSRP3	CENPF
THRB	ASB5	MELK
DIO2	FABP7	TPX2
CIITA	NEB	DGKK
APOL1	MYOM3	SLCO5A1
ITGB3	FNDC5	MYCN
NTRK3	ZFHX4	GTSE1
ITGB6	HOXB13	UBE2T
TPSB2	NPTX2	E2F7
DMD	MYL2	SPC25
ADIRF	FAP	MEX3A
ELF3	NRAP	SKA3
ABCC3	FMO1	EYA1
ANKRD33B	MYH7B	TEX15
LRRK2	SCARA5	ELAVL2
PID1	MYH2	ASPM
CEBPD	RIMS4	NCAPH
TRIM22	TRIM72	GPC2
C4A	ADAM33	CKAP2L
KL	FST	KIF14
ZFP36	EDN3	ESPL1
SCNN1A	DCX	KCNH5
CRTAC1	ATP1B4	CENPA
PTGER3	TBX15	DTL
IL6R	LRRC15	PPM1E
NPHS1	SFRP2	TOP2A
LRP2	CCDC141	BARX1
NT5E	DLK1	LYPD1
PAPPA	SYNPO2L	KIF1A
IL1R1	DCN	CDK1
FAM180A	LAMA2	CDCA5
CSMD2	TWIST1	BUB1
RARRES1	SRPK3	BRIP1
PODN	COL21A1	KLK6
DPYD	MYF5	ERCC6L
SYNC	HOXD13	CDCA8
APOL6	NEFM	CHRNA5
NPHS2	LRRN4CL	MAD2L1
PRRG4	TWIST2	CDT1
SYNE3	LRRN1	LINC00366
ITK	PRAME	CDCA7
CYS1	LUZP2	VSTM2B
CLDN2	LRTM1	SPC24
ACSM2B	HSPB3	KIF18A
EGOT	HOXA13	FAM83D
ADAMTS9-AS2	LMOD2	XRCC2
XAF1	CASQ1	RRM2
BHMT2	COL19A1	ZNF695
ZBTB16	ADCYAP1	C3orf52
EPS8L1	RBM24	POLQ
GBP2	MLIP	KIF11
IKZF3	DDR2	PIF1
AOX1	SRPX	CKS2
SNED1	XIRP1	CCNB1
HGF	CDH15	CCNA2
MRC1	MYF6	SHISA8
COL8A1	KLHL40	IQGAP3
KCNJ1	IGF2	ACBD7
CPEB2	DES	ZNF492
RNF128	CREB3L1	CDH24
C6	SRPX2	MKI67
SLC34A2	SRL	HOXB9
CNTN1	C1orf105	CXXC4
WDFY4	SIM2	NEIL3
LGALS3	SP5	FAM171A2
SLC17A1	MDFI	CACNG4
ADAMTSL4	MYOD1	PKMYT1
PTGDS	JPH2	OR51E1
RASAL1	RAPSN	CEP55
ECM2	HSPB6	ZBTB8B
BLNK	LDB3	TCF24
CFI	PDGFRA	SH3GL3
SERPINE1	ARPP21	NDC80
ABO	LINC00564	HMMR
PCK1	ABLIM3	ORC1
MIR22HG	IL17B	OTOG
P2RY13	TRIM55	SPSB4
FCGR2B	PPP1R3A	CDCA3
ARAP2	PCOLCE	MSI1
C1R	WNT16	SAPCD2
FCGR2C	SLC24A3	CCDC150
CCDC170	SHD	KCNB2
GPX3	CAPN6	CHRNA9
CLU	PDZRN3	RAD51AP1
FGD2	SGCA	ANLN
PTPRT	MYL3	CLSPN
SLC1A3	MEOX2	FZD2
IL33	PTHLH	HAS2
MDFIC	PLAC9	SBK1
HHIP	HPSE2	KCNG3
BHMT	SULT1E1	FZD10
KIAA1755	NAV3	OSR1
SLC12A1	KANK4	CEP164P1
ABCA6	SGCZ	STRA6
AQP2	DNM3OS	ZNF730
KMO	SOX8	FOXN4
MAOA	CACNG1	GINS2
MAMDC2	LBX1	SKA1
IKZF1	COL5A3	AUNIP
CSF1	RN7SL396P	MCM2
SULT1C2	LBX1-AS1	ADD2
VGLL3	TNNI1	BLM
TNFRSF11B	ADAM12	ZWINT
APOL3	COL6A6	RAD54L
KLF2	SGCG	TMEM132D
IGHG3	TRDN	RAD51
SLPI	SLITRK6	CDC6
ITM2A	C11orf87	FAT3
IGHG1	APCDD1	WT1
GGT5	MLLT3	CENPV
NFATC2	SNORD114-3	SPAG5
SLCO2B1	SCUBE2	E2F2
PRODH2	TBX18	ESCO2
GBA3	SLC8A3	TRIM71
ALOX12P2	COL16A1	ARHGEF39
MYOF	DSCR8	ZMAT4
SLC3A1	CACNA2D1	ASF1B
HDC	MEG8	EME1
FRK	ATP2A1	KCNG1
PLN	VSTM4	CHEK1
MT1E	MFAP4	HES6
CD163	KCNE4	MTMR7
HLA-DQA1	RYR3	XKR5
LRRC2	ASB4	CCNF
ATP10A	COL1A2	LMX1B
TSHR	C1QTNF2	LRRN4
PPARGC1A	PDGFRL	B4GALNT4
NUPR1	SYT4	DPYSL4
CFH	NMRK2	RECQL4
IGKV1-5	MKX	SLC15A1
MS4A4E	COX6A2	EPHB3
CYP1B1	DMRT2	MDK
ALDOB	TSHZ3	XKR7
C1QTNF1	TGFB2	SHISA3
CFTR	MEF2C	AURKA
IGKV4-1	F2RL2	ZNF385C
KCNC3	RORB	E2F1
KLHL6	WNT11	CENPH
SPARCL1	PRR16	KLK7
TCEA3	TECRL	RNFT2
CLEC7A	MEG9	RASSF10
ROS1	E2F8	ORC6
KCNC4	MMP2	CNTN5
CXCR6	CAMK2A	TTC24
ART4	JPH1	CDKN3
ACMSD	GAS2	CENPE
ITGAM	RYR1	CENPM
CASP4	NTN1	UCHL1
SCTR	NKD2	BMPER
IGHM	RHOJ	TYMS
IFIH1	ALX4	MND1
GABRE	KRT5	OIP5
TXK	DIO3	CLGN
DEFB1	ARHGAP36	GREB1
CASR	PRSS12	C1QTNF4
CHI3L1	LRRC3B	HOXA11-AS
LINC00924	ACKR4	LINC00491
LAMB3	NRK	ZNF849P
EPN3	VASH2	HOXA11
PDZK1	CHODL	SNTG2
TMEM200A	SLC24A2	GCK
CAV2	DKK1	DIAPH3
SP100	CKMT2	CENPK
TFEC	DUSP26	GDNF-AS1
IGLC2	GPSM2	PLK1
CCL5	STAC	CNTFR
ANXA1	MYL6B	HOXA6
CCL2	PITX1	PAX2
GBP3	EEF1A2	TRIP13
MAL	TBX1	MGAT5B
HABP2	TMEM200B	FAM111B
GCA	HECW1	FOXC2
PALMD	RXRG	PLK4
SOD3	NOTUM	GINS1
SELP	VIPR2	LMNB1
CPM	VAX2	BRINP1
KLF5	POPDC3	MGAM
PLCXD3	GRIN3A	RNF175
KNG1	MIR133B	KCNH8
RAP1GAP	RN7SL767P	ZNF732
F3	MIR1245A	SALL1
CLIC5	NKX3-2	ARHGAP11A
PIEZO1	GRIA4	EZH2
SLC16A7	COL1A1	TONSL
MUC1	JAM2	HMGB3
EGR1	EYA2	DAPL1
ERP27	CSMD1	ABCC8
PARM1	MYBPC2	GRB7
LIPC	AMPD1	COL9A1
FGL2	TRIM63	FANCI
ACSL5	XG	DOCK3
TDRD9	SALL3	PSRC1
KLRB1	STAC3	MLLT11
ANPEP	CRYM	GJA8
CCKAR	TP63	RTKN2
IGKV3-11	CACNG6	OPRD1
PARVG	B3GALT1	LRRC30
SLC6A12	PYCR1	REEP2
FILIP1L	LRRN3	TRAIP
SERPINF2	GADL1	KLHL14
CD2	IRX5	C21orf58
POU5F1	GRID2	AFF2
IGKV3-20	TSPAN8	SLC6A5
CPNE8	AHNAK2	DNA2
NECAB1	VIT	SKIDA1
RUNX1	SNORD114-20	PAX8
CCL28	FILIP1	FAM78B
SLAMF8	IGDCC4	COL26A1
CD44	HTRA3	CENPW
SPTLC3	SOHLH2	GABBR2
CYTH4	ADAMTS14	PDZD7
CD69	ZNF536	SLC32A1
VEPH1	TBX3	TDRD15
AOAH	CA3	PEG10
TMEM47	ADIPOQ	KREMEN2
GBP5	ANK1	COCH
TMEM213	SGCD	UBE2S
DNASE1L3	RGMA	BEX1
EHD2	RN7SL116P	UNC5B-AS1
NPY1R	RN7SL752P	RDM1
LRP1B	TMEFF2	DSCC1
MS4A7	MYOZ1	ZBTB12
ARHGEF38	B3GALT2	MYB
BTC	ATP1A2	ZNF726
LCP2	TMEM158	APBA2
APBB1IP	PRKAG3	DDX12P
MSLN	MPPED2	TK1
TBC1D8B	OLFML3	TRIM46
TLR2	MYLK4	FBXO43
SLC12A3	GLT8D2	KCNH2
IGLV3-21	MYLK3	FAM184B
PIK3C2G	DDIT4L	KIF24
BICC1	EBF1	TIMELESS
MGP	HIF3A	DPP10
EVI2B	TMEM119	DPF1
TNFSF14	ZFHX4-AS1	WDR62
PTAFR	TMEM108	CDCA4
LAIR1	FABP4	SCUBE1
TFPI	TPM2	FBXO5
NPNT	MYH6	RNF182
FAM83B	NTS	DNAJC22
PTPN22	BVES	TMEM72
ATP8B4	KIAA1549L	CENPI
IRF6	TXLNB	WT1-AS
HCLS1	MYOM2	ENO1P2
SYPL2	CACNA1G	CDH10
KLF4	PLP1	IGFBPL1
MAP3K5	ADAMTS19	FANCD2
HNF4A	NRN1	PLEKHG4B
CCR2	FOXL2	C3orf70
GRB14	COL25A1	KPNA2
SLC18A2	C10orf71	CLEC18B
ARHGAP30	HAND2	SIX1
PMP22	MN1	RPS3AP44
CD302	MEG3	PCYT1B
CFB	FLNC	HOXC4
SLC16A4	SNORD113-3	NELL2
LPCAT2	NEFL	CD19
FOS	BCHE	HOXC11
CD209	COL9A3	CCNJL
GRM8	PRL	PAFAH1B3
S100A4	VGLL2	SCML2
HSPA7	SLC30A10	PARPBP
PGR	DYNC1I1	LINC00887
LYVE1	CALB2	INA
EGR3	SOSTDC1	TCEAL5
DSEL	AGBL1	MIMT1
HGD	LRRTM4	PLAG1
UMOD	SNORD113-2	STMN1
CLNK	GJD2	CRB2
CDCP1	C8orf34	GINS4
ATP2A3	IGFBP5	HOXA9
SGK1	FBN2	FFAR1
RERG	NDST4	PMEL
OBP2B	TSPAN7	RACGAP1
ABCA4	OLFML1	POC1A
MS4A6A	DSCR4	LINC00923
CARD6	KCND2	EFNA3
IGLV2-14	LRRC38	TMC2
RASD1	ASPN	LINGO2
ACTG2	SNORD113-1	HOXC6
PRR15L	HRC	SH2D5
CAPN8	PRRT4	TRABD2B
DGKG	FNDC1	NRG3
IGLV2-23	SNORD114-6	SLCO1A2
NAPSB	PDLIM3	BTN1A1
NR4A3	COL3A1	BEND4
MNDA	TSPAN11	ATAD5
PAPLN	SNORD114-2	MYO3A
CX3CR1	TNMD	KCNF1
TRAF3IP3	VSNL1	C2CD4C
IRF8	GAP43	GAL3ST3
CXCL2	LRRC39	HOXC10
GPR34	MSC	EFNA2
ASPA	KCNK3	STAR
ACSM5	FAM171B	DUSP4
IL10RA	SNORD114-21	CCDC74B
RGS7BP	LDB2	LBX2
HNF1A-AS1	LGI1	ELOVL2
LPL	RBMS3	FANCB
ZNF154	EDNRA	MARVELD2
P2RY6	COL5A1	CA8
PKD1L2	SNORD114-7	TRIM43
AGT	MAB21L1	CTTNBP2
SLC19A3	CD248	PHF21B
TMEM140	FMOD	NXPH4
TNXB	SPON1	AMHR2
SYNPO	PGF	KNDC1
MEGF11	TNN	KNSTRN
SAMD9L	HAND2-AS1	CCDC177
CTSG	COL5A2	HTR1F
HKDC1	KCNMB4	TERT
SLAMF6	ARSI	DISC1FP1
CYTIP	FRRS1L	PDYN
IRF5	FOXF2	MCM4
HLA-DMA	PCDH18	SALL4
LY75	SNORD113-9	HOXC8
IL15RA	DCLK1	TMEM132A
CASP1	EGFL6	ADCY2
GLYAT	GAD1	GAPDHP21
SSPN	DRP2	AP3B2
IGHV3-23	SCN4A	HPDL
UGT2A3	FSTL5	GLB1L2
DENND2D	SNORD114-11	TACC3
GPRC5A	SRD5A2	TLE6
ALDH3B1	SLC26A7	TMEM100
CD84	MYOM1	CKAP2
IGHG2	PENK	PKDCC
ITGAL	LRRC17	PTPRR
EGR2	CPE	CKS1B
SEMA3C	PAX9	WDR54
PTPRC	PGM5P2	THOC3
IGHV3-21	ADAMTS2	ARHGAP19-SLIT1
SAMD4A	ART3	MEIS1-AS3
LONRF3	NKD1	SPOCK3
PYHIN1	XPNPEP2	CYP27C1
LCNL1	CLMP	OSBPL6
FCER1A	PMEPA1	HOXA5
ICAM1	SPHKAP	SPINK8
TMEM176B	AKNAD1	SLCO6A1
NAPSA	SHISA6	TMEM97
FGR	PPFIA4	FEN1
NTNG1	PGM5	TCEAL2
TC2N	USP6	ITGA8
DOCK2	ISLR	SEC14L6
LTBP2	TEX41	STIL
IGLV3-19	THBS4	KIF19
SIRPB2	LOX	MFAP2
IL16	ADCYAP1R1	CCNE1
SECTM1	STMN2	HOXB8
SLAMF7	TNFAIP6	MAP2
WNT2B	ANKRD1	MARCKSL1
NFKBIZ	TIMP4	EDAR
NLRC5	SEMA3D	TUBB4A
LCN2	SNCAIP	HOXA-AS3
MYO1F	GRIA1	UNC5C
FGF1	LINC00626	GLB1L3
AQP7	F10	SPATA31C1
OSMR	TSPAN18	KCNJ11
AQP1	BCAT1	RHPN1
FBP1	KLHL31	HOXD11
IGHV3-30	EIF4EBP1	MPPED1
GPR65	RN7SL128P	KLHL23
KCNMA1	SATB2	PSAT1
TSPAN1	TMEM182	DMRT3
TLR7	PAX1	DLL3
PIK3R5	WNT9A	BRCA1
EPAS1	SEMA6C	WASF3
PLA2G4C	SHOX2	HOXC9
CD37	TLL1	HOXA10
CH25H	IL17D	SP6
RANBP3L	CYP2J2	GPC5
VAV1	COL14A1	CASKIN1
GIMAP8	TENM2	GRIK1
RBM47	PRKG2	CAMSAP3
GPR174	ST8SIA1	RASL10B
BBOX1	KCNN2	SPTBN2
PTGS2	MIR125B1	CIB2
CLSTN2	EMILIN1	PLCH1
SCNN1B	PMAIP1	MCM7
CR1	ADAMTSL1	SYNE4
DPP4	KDELR3	CASC9
AQP6		SUV39H2
ARHGAP15		SLC5A8
FCGBP		ATP8A2
SCN9A		TMEM169
FAM110C		ECT2
ARHGAP29		CHST1
MAFK		FANCA
NTN4		MEST
CFD		CENPO
TYMP		LRRC61
AREG		GLT1D1
RP1		HUNK
NLRP3		CLDN4
TTC22		RGS17
FOLR1		OXGR1
TLR5		MIR181A2HG
ZNF208		RIMS1
CD96		B3GAT1
ALOX5AP		DRAXIN
RHOH		LMNB2
BIN2		MEX3B
SSC5D		B4GALNT3
LAX1		CHAF1A
TLR6		GPRIN1
BDKRB2		SHC4
DCDC2		GRIN2B
THEMIS		SORCS1
IGHA2		GRM7
KLF9		GRIK3
RGS6		MAL2
TMEM37		KLHL32
GJB2		CDK5R1
SIGLEC1		SLAIN1
TMC8		SLC7A3
ZFPM2		HOXD1
IGHV5-51		SRSF12
C7		HELLS
HEPACAM		RFC4
GIMAP7		EPCAM
MEDAG		POLD1
THRB-IT1		WDR76
GPC4		ENHO
LRRC19		PODXL2
PRDM6		KIAA0087
AMIGO2		C2orf72
AOC1		ACVR2B
ITGB4		LRRIQ1
CD53		KLK8
NCKAP1L		GATA4
CD3E		TRIM17
PSTPIP1		WDHD1
PARP15		KIF22
C3AR1		MAG
IGHV3-7		SUSD5
RYR2		POLE2
RGS18		CCNA1
SYTL4		NME1
P2RX7		SLC30A3
SNX20		GJC1
CNN1		LRRTM2
KLRD1		CYP4F23P
SELPLG		E2F5
GABRP		CCDC77
IGHD		TRIM43B
ARHGAP9		DPEP1
SLC9C2		MYO15A
TAGAP		DNAH12
LHX1		CCDC169
GADD45B		LINC00871
GSAP		TMEM151B
CEBPB		STOX1
CASP10		DPP6
PDE1A		GHRL
EPS8L2		BCL7A
CLDN10		DHFR
PTGDR		GGH
SLC38A11		GPC5-AS1
TINAGL1		NPY
TLR3		XRCC3
SLC11A1		PRSS8
RGN		FOXD1
MS4A4A		RAD54B
CLDN8		JAKMIP2
IGLV3-1		RIPK4
ZFYVE28		TMEM178A
LINC00861		NYAP1
MICAL2		FADS2
CA2		CLDN6
CCR5		CCDC167
ZNF300P1		CHTF18
HLA-DPA1		NECAB2
SASH3		CCNE2
TMPRSS2		PCBP4
PRDM1		MMP16
GALNT15		YBX2
FRY		RFC3
ADAMTSL4-AS1		ADAM11
RRAD		ESPN
MTUS1		SMPDL3B
CYSLTR2		EFNA4
TMOD1		FOXD4L1
RNF144B		PRTG
XKR4		PCSK1N
KRT17		NT5DC2
IL2RB		RAB3B
FAM81A		PCNA
IGKV3-15		GLP1R
IGHV2-5		USH1G
PCED1B		RMI2
RNASE6		NDST3
NCF4		RGS7
TRBC2		LSR
BMP5		INCENP
CARD11		SCN5A
AOC3		ROBO2
MAFB		HMGB2
RASAL3		HAP1
TNFRSF14		AMH
TLR1		NPM3
IGHV3-15		GNG3
GAPT		DBN1
LAMP5		TEKT2
CPEB4		ST6GALNAC5
ADRA1A		POTEF
ME1		CTSV
ABCB1		PSD2
NABP1		ITPRIPL1
PPIC		LAPTM4B
THEMIS2		NCAM1
ACSS3		LINC00958
SLC44A4		CCDC138
VNN1		CCDC136
GATA6		CUX2
PTPRQ		CHAF1B
ASS1		SSTR5
ADTRP		ARID3B
GEM		C6orf118
PIK3CG		GMNN
HLA-F		ZSCAN2
COMP		DCDC1
IL34		GDF11
P2RY10		APC2
CRISPLD2		UNGP1
KCNJ3		CCDC74A
RGS1		SRCIN1
IGHV4-59		SIX4
CAV1		LINC00664
RBP4		ODC1
IGKV1-9		MXD3
TM6SF1		UBE2Q2P2
SPI1		STRIP2
BTK		CLEC18A
NOSTRIN		SOWAHA
PDE4A		HOXB6
IL18		MAPK15
HAVCR1		CD22
CMKLR1		BORA
FHL5		MAP7D2
CX3CL1		ASXL3
NR4A1		TUBA3FP
CLDN7		SMC2
IGLV8-61		KNTC1
SLC22A2		CDH2
EGF		SKP2
HLA-DRB5		RN7SL677P
MX2		ZNF48
HNMT		POU6F2
FBXO32		CCDC88C
GCNT4		DDX11
SCML4		LRRC9
DSC1		HOXB2
PROSER2		HCN4
GNA14		SLC25A21
CBX7		DHRS13
SAMD3		CDHR2
SP140L		EMILIN3
NLRP1		HS3ST5
FAM133CP		REC8
FPR1		DACH2
FOSL2		KDM2B
FOXQ1		MTBP
IGFBP6		HOTAIR
GAB3		DNMT3B
NR4A2		COL13A1
CD82		CCDC34
LILRB2		HIP1R
AMY2B		FOXI3
TMEM144		CITED1
RELN		GPRIN2
CSF1R		GYG2
MS4A14		SPDL1
MMP24		NUDT11
ATP6V0A4		HOXD4
ENAM		MYRF
NPR1		KIF26B
CLEC10A		HOXB3
CTSS		ST6GAL2
FMO3		ZFR2
IGHV4-39		JPH4
MILR1		PRIM1
CIDEB		FGF17
FRMD1		MCM3AP-AS1
CD1C		C22orf15
PLEK		GFRA3
CXCL16		BEND3
VSIG4		MCM3
P2RX1		SHMT2
MLKL		ZNF620
F2RL1		SAMD15
IGLV1-40		SBK2
RTP4		MYLK2
RUNX3		GPR19
CYBB		RND2
LINC00472		STAT4
CLEC4E		AGGF1P2
GIMAP5		FOXL1
CALCRL		CDC7
GIMAP1		BRCA2
IGHV1-24		FZD3
PDCD1LG2		DYDC2
FCRL5		ATAD2
PLA2G2A		EFS
IL21R		ZNF729
A4GALT		CHD7
SLFN12L		HOXB5
DNAH5		WFIKKN1
CSF2RB		TRIM59
CST5		CHMP4C
TNFSF8		GPHA2
INPP5D		P2RX6
HMGCS2		KCNC1
PTPRO		FANCG
TFCP2L1		FZD7
TJP3		PRR11
CPXM2		MIF
ACAP1		FZD10-AS1
IGHG4		SYT13
S100A10		ULBP3
SLC15A2		CLEC18C
LYZ		EMID1
ACSS1		KEL
LEPR		CCNJ
HCK		UGT8
FAM13A-AS1		SPOCK2
GJB1		CPNE7
ADAMTS1		PAQR4
IGHV3-33		KIF5A
NFATC1		HOXA-AS2
GPR132		DSG2
KYNU		ANKRD18A
PLEKHH2		RN7SKP53
TGM2		TUBBP5
CELF2		PRC1
IGLV3-25		SOWAHB
FLVCR2		GSTO2
C11orf96		TEAD2
RAB17		EDARADD
PRKCH		BAIAP2L1
EDN1		ZNF738
HLA-DRA		HOXB4
IL6		TIAM1
DOCK8		UNC5B
IGKV1-27		PLA2G3
NFIB		NETO2
OGDHL		UNG
ADH1C		RHEBL1
IL18RAP		MIR600HG
ALDH1L1		TTC29
PAQR5		CREB3L4
COL15A1		ATOH7
ACSL1		SNORA80B
SCN2A		MMP26
PLA2R1		SALL2
MPEG1		ETV1
FCGR2A		LINC00276
AIF1		ZBBX
SLC13A1		NGFR
GBP4		TMEFF1
STAT5A		CAMKV
ADAMTSL3		SLFN13
ACADL		ADAMTS7
NIPAL2		LHFPL1
SOCS3		LINC00327
VWA5A		KCTD15
RASGRP1		GOLGA6L9
COPZ2		FRMD5
TRPM2		FAM201A
FXYD2		FOXO3B
IQUB		KRT18
IGLV1-44		NCAPD2
CADM3		DTYMK
KIF12		SCUBE3
DSC2		RHPN1-AS1
BCL6		IGF2BP2
GPR171		PNMA3
CES4A		DNAH10OS
GIMAP6		HOXC-AS3
SAMSN1		CNIH2
POM121L9P		CTXN1
PPP2R2B		LPAR2
MX1		NSUN7
PAH		HOXC5
IGFBP7		SAC3D1
ARHGEF6		RPL7AP66
PLCL1		BRSK1
INMT		GINS3
SLC46A3		AFF3
SH2D1A		RIBC2
HPN		RNF157
GDA		DBF4
TM4SF1		CHST9
XCR1		MIR17HG
CDKN2B-AS1		MIR548F1
CD48		SLC5A9
WFDC1		RTN4R
PCED1B-AS1		C4orf46
SP140		TSGA10
SERPINA3		HOXD10
SFMBT2		DDX25
SLC9A9		SOBP
TEC		DKKL1
HCP5		CLDN9
STOM		LINC00621
FCER1G		KIF25-AS1
REG3G		CALN1
PROCR		TRIM36
CCR1		RANBP1
EVI2A		ZNF286B
PRSS16		MIR196A2
KCND3		MIR3153
ADRB2		CENPN
CDH6		C2orf15
VWA3A		NIPSNAP1
TMEM252		WFDC2
RASGRP2		CNTNAP2
PARD6B		GPR156
CACNA1D		TEX9
CLDN16		GLYATL2
WDR72		GALNT9
SCIMP		FOXD2
CTSK		CNTNAP5
CD33		CCDC33
SBSPON		LRP4
HTR2A		CDHR5
B3GNT9		SPATA31C2
LAT2		SNRPB
LCP1		DNAH10
CDS1		RSPO1
CCL4		RPL29P19
IL1R2		KIF20B
VCAM1		SLC4A8
SGMS2		NR2F6
TRAC		USP43
MAGI2		PLAC1
FMO5		ZCCHC18
GZMK		SATL1
PRRG1		C14orf39
TGFBR3		KCNK2
PTGER2		CDK2
SH2D3A		SPATC1L
TMEM52B		SNRPF
P2RY14		ITM2C
COLCA1		TMCC3
TRPM3		HEY1
DPEP2		CERS1
PLA1A		TMPO-AS1
TRADD		GBX2
GIMAP4		IGSF9B
NACC2		PSMC3IP
CES1		C5orf34
CLIC6		CENPL
MOXD1		FAM227A
MVP		SHROOM3
LILRB5		BCL2L12
IGHV1-2		GRIK4
HLA-DRB1		LRRC20
IGLV1-47		E2F3
ARSJ		NCAPG2
IFI35		DNAJC5G
SIGLEC6		TNFRSF19
ENTPD2		ZNF98
ST6GALNAC2		GAS2L3
PCP4		LRRC4B
TMBIM1		POU6F2-AS1
MITF		HRK
ALDH1L2		ZIK1
CATSPERB		HOXA7
STAB1		DACT2
PSMB9		CCDC85C
TLR8		DCUN1D2-AS
KCNA1		REM2
IGLV2-11		BEX5
TIGIT		UBXN10
GAS6		HOXC-AS2
ZMYND15		DOLPP1
KITLG		ANKRD18B
KCNK6		COL9A2
LINC00578		CELSR2
BEND6		PEX5L
MYL9		STK32A
FAM20A		ZBTB39
RAMP3		PLS1
TNFRSF1B		SNRPE
IGHV3-11		ENC1
RAMP1		CDCA7L
HP		MSH2
ARRDC2		OR51H2P
ALOX5		PHF19
LY9		LYPD6
CD300LG		NETO1
NCF2		LIN9
DRAM1		USP49
LRRK1		VRK1
HLA-DPB1		NDRG4
CD86		ART5
CHRD		RNU6-687P
STX11		PURG
SPATA6L		SYT1
BGN		UCK2
MFSD6		TRAPPC2P2
S100A9		SULT4A1
ZNF385B		GUSBP8
IL2RA		SYNGR3
PADI2		TCF3
JAZF1		GCNT2
OAS2		ARMC3
IGHV3-74		ZNF300
HAVCR2		VANGL2
AQP3		KCNK9
SLCO4C1		KCNIP1
MYOCD		ZNF114
CD3G		SHISA9
PLCB2		ATG9B
IL12RB2		SPINT1
THBS2		MC4R
ZEB2		SPTB
MYO5B		TMPO
FCN1		RADIL
DUSP1		FAM72D
TM4SF4		NRTN
ZFP36L2		TARBP2
IL1RL2		RFC5
VDR		TMEM200C
FAT2		HSF2BP
IRF4		CBS
HSH2D		SCN11A
NCEH1		SEC14L4
TNFRSF10A		LINC00683
NFIC		DNAAF3
S100A2		GTF3C5
PLIN1		MTFR2
IGKV2-24		CTCFL
SPATA18		POLE
NAAA		VN1R81P
IL7		RRM1
ABCA10		BYSL
LDHD		ZNF367
IGHV1-46		IQCH
CLEC5A		WNK3
GZMA		TNFRSF13C
ABCG2		FANCE
PDE4B		SAMD14
SSTR2		KIAA1549
PRF1		PPAT
EDNRB		BACH2
CDH1		MAST1
CD274		MIR10B
SLA		MCM6
TNFAIP3		LINC00954
CCL22		ZNF93
ERRFI1		HSF2
ATF3		MEX3D
COL10A1		HMCN1
TTC39A		EFNB3
DAPP1		GNAZ
NLRC3		BIRC7
PLAU		MCM5
PIK3IP1		ONECUT2
LILRB1		RBP1
UGT1A6		ZNF521
CRB3		DOC2A
LPAR5		ZNF711
IGHV1-3		GPR143
KCNA3		C14orf132
SHH		TIGD3
THBS1		BEX2
CHIT1		MAD2L2
DOK5		FAM72B
SCNN1G		G6PD
BHLHE40		NBAS
PTGS1		LINGO1
GIMAP2		MDH1B
KRT8		VPS72
CLEC12A		MEIS1
IFI44L		SCG5
TGFB1		OR51L1
SMIM5		PRKCZ
SLC17A4		UTS2R
IGKV1-16		RAB39B
PDE2A		ZNF423
CD14		HOXD3
SPN		CD320
LMCD1		KSR2
SLC6A20		SLC25A15
CD5		CADM4
DAB2		ALYREF
AKR1C3		GRIP1
LIN7A		ABAT
ELMO1		VGF
SELE		NDC1
TMEM71		CENPJ
LYNX1		TFAP4
CYBRD1		HAUS5
ZC3H12A		BOP1
RNASE1		NMU
LILRB4		TUBA1B
MFAP3L		C20orf96
THSD7A		ZNF571-AS1
POU2AF1		RBPMS2
RNF157-AS1		CIT
MAFF		ESM1
C1orf162		RFC2
ERAP2		INPP5J
LGALS9		KCTD19
CDH23		AMPH
TMEM51-AS1		DPY19L2P2
LAPTM5		KIAA1958
ALDH1A3		DPCD
SIAE		NUP210
ENDOD1		RBM20
SLAMF1		TMEM38A
MARCO		ANAPC1P1
INHBA		CENPQ
PLSCR1		MCM8
LGALS2		UGT3A1
TMEM176A		ASIC1
RGL3		IGFBP2
SDR42E1		HDAC2
SLITRK5		RPL5P18
SGIP1		PRDX2
IGLC3		DDX11-AS1
LIPH		ANKRD34B
ISG20		TEX30
ENPP1		LRP8
SHE		ZSWIM5
ZBP1		TUBBP1
TMEM156		ZNF519
S100A6		SNRPC
IL18R1		ZNF428
MGLL		PPFIA3
IGHV3-49		LZTS1
SGPP2		LRRC37A4P
HSBP1L1		GLS2
TRGC2		KRT18P59
TAGLN		EHMT2
CD74		LINC00618
IGHV3-13		APLN
TAL1		ELOVL6
IGLV2-8		TAF5
ITGAX		FAM216A
IL1B		PEG3
LY96		SMC4
ZNF831		ZRANB3
ARL4C		TRPV5
IRAK2		GRM4
BATF3		AADAT
NMRK1		QSOX2
BEST1		MGAT3
CD163L1		FOXD2-AS1
UNC13C		RCC1
FBLN5		ZNF90
CA12		BAIAP3
MAGI2-AS3		GLYCTK-AS1
GALNT14		PWRN4
GPR183		ZNF165
NLRP2		GALNT8
SELL		GFRA1
TRDC		CEP85
VENTX		NUP62CL
IGIP		HS3ST3A1
MAP3K8		ZNF775
P2RY2		CEP41
TP53INP2		WRAP53
TNFAIP8L3		GEN1
ACSM3		VPS37D
IFI44		HIC2
STAP1		MPP2
FCGR1A		PRSS50
TRHDE		ASRGL1
CRYBG3		ETV5
TMEM139		DNAH6
MYC		CECR2
DDC		HAS2-AS1
ANXA9		ZNF850
IGLV6-57		ELOVL2-AS1
FERMT3		KIF5C
IMPG2		PFAS
SPATS2L		CEL
RNF212		ANKEF1
HRH1		EMBP1
PTGIR		CHRNB4
DMKN		SCN8A
SHANK2		CACNA1H
HFE		HSPE1
PSORS1C1		MIR196A1
MR1		MBNL3
KCNAB1		CACNA2D2
ENG		CDK8
CEACAM1		CBX8
HERC6		RPLP0P6
C5AR2		AMER2
IFIT3		PLEKHB1
CNGB3		MMS22L
ITGA3		YWHAZP4
SDC4		ZNF74
A1CF		TRO
DENND1C		NTRK1
RASSF7		CELF5
CYP4A11		TCEAL7
CYP2C9		SASS6
TMEM154		LSM4
GNA15		ZNF252P-AS1
TMEM30B		LIG1
UBASH3A		FAAH2
ALS2CL		DSP
IGHV3-48		CCDC175
KY		RIMKLA
RASGEF1A		CADM1
PLD4		BRICD5
CARD16		ANO9
PLD1		LINC00032
CYP1B1-AS1		PAPPA2
IGHV1-18		RAC3
NUGGC		ZNF560
CEBPA		NUDT16L1
IGHV6-1		OTUB2
PNPLA7		TMEM190
SULT1B1		HOXA1
ESRP2		INPP5F
DDO		GOLGA6L10
LST1		CCDC24
IL32		NAT14
ADAMTS8		TGFA
SLA2		PACRG
CXCL9		PKN3
GGT6		TUBA1A
SLC22A18		PLEKHA8
P2RY12		ACSBG1
FPR3		FBXO16
ZNF469		GTF2IRD1
HPD		ACAN
VTCN1		ANKRD13B
CD200R1		SNRNP25
RERG-IT1		HOXA4
HSD11B1		SAMD1
LRRC25		LRRC10B
OLR1		NRM
HLA-DRB6		HMGB1P5
CST7		SNHG1
NFAM1		ASS1P1
SPP1		MSH6
IGKV2-30		PPP1R26-AS1
CD38		ID4
RN7SL834P		KBTBD11
SERPINB8		PTPRG-AS1
PTPRE		PAICS
MOCOS		LINC00870
TNS1		PSMB5
SIGLEC10		PNCK
ITGA2		FOXP4
CYP4F12		SNRPA
MYLK		ST6GAL1
IGHV3-20		ILDR2
TEK		ARHGEF4
ACCS		CHST4
ADORA3		HAUS1
TRGC1		QPRT
MT1M		STRBP
LRCOL1		DNAJC9
MATN2		CD1D
TESPA1		RGS4
LRG1		IL19
AKR1C5P		PPIL1
TNFSF13		PLEKHH1
UPP1		FGF10
TCIRG1		CELSR3
ENTPD1		GALNT13
CCL21		FGF14
HPGDS		CACNB3
F2RL3		DNAH14
ADAP1		SLC7A11
S100A14		GRIK2
LIX1		SRPK1
GPR160		DACH1
FRMD3		SNHG6
RN7SL473P		TUBB
DNAH7		DENND5B
KIAA0040		TGIF2
HRH2		OCIAD2
ABI3		GPX7
ITGB7		HOXA3
ARHGAP18		CMTM8
CD40		SCD
IGSF23		SYTL1
CLEC4GP1		STAC2
HLA-F-AS1		ADGB
CXCL10		ZNF648
TRAT1		TNNI3
PLXNC1		SLC9A3
DMRTA1		MAPK12
HTATIP2		CES5AP1
ADAP2		PARP1
DGKI		NUSAP1
NUAK2		ANKRD18DP
HBEGF		GRIN2A
TLR10		MAEL
FUT8		STXBP5L
GPRIN3		ZNF232
STEAP2		YPEL1
RASGRF2		RPL39L
RN7SL600P		ACRV1
RAC2		FANCF
CD4		PHF6
RNF180		SHCBP1
CAPN13		HSD11B2
LCN12		OR51A7
ZBTB7C		KLHDC9
IRF1		MEIS1-AS2
GALNT3		PPP1R26
PCDH1		CEP78
VSIG2		WASF1
PPP1R16B		GPR161
WAS		NR2F1
C2		FASN
F11		GPRC5C
MT2A		MMP23B
TMC5		USH1C
ANXA3		CXXC5
KRT80		SPINT2
IGHV4-61		SEMA3F
TNFRSF8		ZNF214
JUNB		OR51A8P
SLC7A7		ITGB3BP
ICOS		ZNF503-AS2
RAI2		TUBG1
CDKN2B		TMTC4
CD3D		ALKBH2
TMEM229B		FAM161A
CADM2		ST6GALNAC1
STK32B		APOBEC3B
SLC2A9		PRIM2
NRIP2		CPT1C
DOCK10		UQCC2
IGKV1-17		EFNB1
LYN		WDR18
FAM149A
PTPN7
CTLA4
GPD1
KLF6
HOPX
ITGB2
GRAP2
IGHV3-53
CASP8
DLGAP1-AS1
C1QA
CTSH
ANKRD29
OSTF1
HLA-H
TYROBP
KCNJ5
ERG
TRHDE-AS1
SIGLEC9
THBD
BTNL8
EFEMP1
IGFBP4
IGKV1-12
CLCNKB
C11orf21
LY86
APCDD1L
FBXL16
OCLN
CREB5
IGKV1-6
KCTD12
DHX58
SMCO3
IGFN1
ZHX3
GADD45A
IRAK3
GPR88
AVPR1A
SULF1
CD300E
PHYHIPL
NDRG1
UNC93B1
CLCNKA
ANO5
STK17A
ENPP2
HPS1
TMEM220
DTHD1
LIMS2
SLC44A3
CYP7B1
HR
RBPMS-AS1
TACC1
SLC2A2
SLCO3A1
NMI
C1orf116
SLC52A3
FGF9
PKHD1L1
KLKB1
CD247
CORO2B
TDRD10
CLEC2B
SLC22A11
C1QB
GBP1
CCDC88B
TMEM255B
TMEM125
VWA7
ABCD2
MRO
LAMC2
CCDC69
RHBDF2
FMNL1
DNAAF1
OASL
TAP1
CCL3
MIR30A
IFIT2
SUCNR1
PDE7B
ITGA10
GBP1P1
APOBR
IGLV3-10
TNFSF12
DSCAML1
IGFBP1
GSTA1
GUCY1A2
COX7A1
PPARG
PLG
TCF23
PLLP
ITGBL1
PER3
CDKL2
ANXA2
LLGL2
NMRAL1
KCNMB1
GPR82
MUC20
CLIC2
BCL3
BCAM
PLAC8
PCAT1
CCDC85A
SLC25A45
SERPIND1
HLA-E
RASL11A
NR1D1
NLRX1
CD226
CTSW
ESAM
LRRC31
PCLO
LAD1
LRRC32
CYP3A5
AVIL
MZB1
FOLR2
GMPR
DLGAP1-AS2
NR3C2
MIR497HG
CYSLTR1
DMGDH
ASPG
CBR3-AS1
ITGA11
SPATA13
PRNP
MYH14
EDIL3
MMRN1
OSBPL3
SLC24A4
AIF1L
CCR4
ANO3
IGSF6
C16orf54
SIGLEC8
WWC1
KLRG2
HSF4
EMILIN2
SH3RF2
VNN2
CADPS
ITIH2
VWC2
STEAP3
NCF1
MICA
CLEC9A
SLC43A2
TDRD5
MAN1A1
LILRB3
LRRC4
LINC00957
FCRL3
C4orf19
POF1B
FOSL1
CLEC1A
LSP1
SLC2A5
LINC00426
MIR5690
RHBG
PRSS23
LUCAT1
SP110
SUSD4
RIC3
PTPRB
VMP1
SOD2
IGHV2-26
GCGR
CCDC73
FSTL3
C1QC
CD6
MEI4
CPEB3
AP1M2
TMEM255A
CRYM-AS1
MBP
PRDM16
NEGR1
SLC41A2
SYNE1
CD52
IFNG-AS1
CLDN23
TMEM130
ZC3H12D
TNFAIP8L2
NCAM2
EGFR
PXMP4
GATA2
MATN1-AS1
RFTN1
SAMD9
IL4R
G0S2
AK7
POU2F2
ST14
GRAMD1C
GAS6-AS1
EOMES
APBA1
PLSCR2
ALB
IGHV2-70
CD40LG
WNT9B
PLCH2
IL12RB1
IGFBP7-AS1
MT1X
ZFP92
TAP2
DGKA
CTSO
NUDT18
IGHV3-73
CD109
PPL
RELL1
IL15
ANKRD44-IT1
NR3C1
MAN1C1
TNFSF13B
TMEM106A
AIM2
SPSB1
AKAP6
IGKV2D-29
SLC4A10
AMN
NPY5R
EFCAB13
B4GALNT2
RCAN1
SLC4A9
PDE6B
SKAP1
LIF
HCG27
PLA2G4A
KLHDC7B
CTSZ
SLC16A5
OLFML2A
MFSD2A
SPR
MMP28
ARHGAP26
PLCG2
SVEP1
SLC14A1
SERPING1
MIAT
CYP4F11
LRRC37A6P
TICAM1
HERPUD1
BNC2
HPGD
TNNT2
ANXA13
HLA-DOA
GSN
ITGAD
AHNAK
RASGRP4
SYNM
TGFBR2
TAPBPL
ANKDD1B
MOB3C
HCST
ALDH8A1
MYO15B
AXL
DPYS
SLC27A2
CC2D2B
EMX1
HYDIN
NAP1L2
CHI3L2
GDF15
LILRA2
KLHL29
HLA-K
SLC31A2
CAPN12
IGFBP3
ACTR3C
MYO1G
DIRAS3
B4GALT1
GLDC
ARRDC5
IYD
LINC00511
QPCT
SYDE2
SGK2
CSTA
LAMA3
TACR1
GLIS3
APOB
GSTM5
ITGB2-AS1
GPNMB
MEFV
VAT1L
ELF5
MAMLD1
P4HA3
TAPBP
DNAI1
STXBP2
CDKL1
CSRNP1
ADH6
ANO1
ZNF366
CNGA1
TMEM150C
PTER
ANKH
STARD8
C16orf89
RBM11
NKG7
ANKRD36BP2
DENND3
USP2
STK17B
CBLN4
HSD17B2
CD180
PRAM1
CCL18
FCRL6
AZGP1
CD1E
METRNL
UNC5CL
SLFN11
TMEM236
EBI3
ILDR1
IGLV4-69
TRIM38
SH2D1B
RBPMS
SLC6A13
ATP1B1
CLEC14A
SIGLEC14
SYT12
LAMP3
ELL2
NLRC4
TFAP2B
PTK2B
PDLIM2
MIR4802
TMC4
PCBP3
LINC00702
FCGR3A
ST18
RGCC
CD28
KANK3
PSMB10
ARHGEF37
FBXL8
MLXIPL
PCDH7
SYTL3
RN7SL653P
IGHV3-72
BTLA
KLF15
SFN
SYTL5
ARID5A
CBR3
CDH17
AFAP1L2
GLI1
SPON2
CYP4B1
EXOSC3P1
ARHGDIB
GIPC2
CUBN
SYTL2
ERBB3
TNFRSF12A
USP53
CLEC3B
FOXJ1
PBLD
ABCG1
C2orf88
OPTN
FHL2
DHRS2
BCL2L15
PPFIA2
CGN
PLIN4
LINC00886
PDGFB
CRYL1
PLB1
IGLV7-46
HEPH
GPR155
LILRA1
CASS4
MST1L
AOAH-IT1
GLIPR1
RHOB
TLCD2
DNM1P35
SCN4B
TTYH1
EVPL
TBX2
APOL2
ITGA1
IGHV4-34
FABP3
SNX18P3
S100A16
SRGN
RILP
GATM
ITGB8
HLA-B
COL27A1
CCR7
LINC00882
RAB11FIP5
LMO7
UAP1L1
IDO1
SERPINB9
S100A8
PYGL
NPL
TMC1
SIRPA
ADAM28
CD8A
KIFC3
A2M
BST1
FAM3B
PKD1L1
NEAT1
CD27
GRID1
NIPAL1
KCNQ1
C1orf210
GZMB
RIN3
SAMD5
LCK
SLFN12
GFI1
RDH13
ANKRD22
KLRF1
CCL8
SLC37A2
RNF207
IFITM1
AGR2
PDE4DIP
MT1F
BLVRB
MCTP1
RAB27B
BANK1
UBA7
LINC00299
CYP4F3
PRICKLE2
MPP7
PARP12
CORIN
ADRA1B
ZNF671
NOD2
LINC00963
STEAP1
PODXL
MFSD6L
CYB561
KLHL33
CRTAM
TRIP10
FZD5
CDKN2C
NOX4
HEY2
PLOD2
PARP9
TMCO4
GALNT10
SCN7A
CCDC68
LACC1
CCL3L1
CHRM3-AS2
FAM20C
LTB
ATP10D
ETV7
PAPSS2
KIAA1210
HEG1
ATP6V0D2
RXFP1
ZMAT1
DCSTAMP
SPHK1
SLC6A1
SAMD12
MEF2C-AS1
HLA-C
EMCN
MCOLN2
FRMPD2
REPS2
FLT3
CYP4V2
PPP1R12B
PCGF5
ACKR2
BTN3A3
PLCD4
LINC00639
CARD10
EXOC3L4
CREBL2
ZNF826P
TRIM6
LINC00173
MUC16
F5
DDX60L
CCL14
SERPINB1
GOLGA8N
NEK5
RSPH1
KIRREL2
SYNJ1
MC1R
GVINP1
CD7
ARHGAP22
HOGA1
ARHGEF16
HLA-DOB
LNX1
CAPN3
EMX2OS
RARRES2
IL4I1
MYO3B
HSD3B7
FAM83H
TSPAN32
APLNR
PSD4
AQP9
COQ10B
LHFPL3-AS1
LYSMD2
KRT19
PSMB8
C1orf115
PLEK2
COL11A1
ZNF860
RHPN2
PTPRZ1
CHDH
PROS1
KLHDC7A
NCR1
FRZB
NPR3
SLC4A4
MROH7
PRSS22
HTRA1
BOK
EPOR
ARL11
KCNN4
SLC16A11
ATAD3C
SEZ6L2
RPL7L1P9
ADHFE1
BTG2
RAB25
ACOX2
IPCEF1
PARP10
CD58
CEACAM21
ARHGAP8
STARD13
ARHGAP31
KIAA0513
TFEB
HMCN2
SH3TC1
STX3
NID2
NEIL1
DIRAS2
TRPS1
GNG7
ZBTB20
MAP7
TNK1
IER3
CD300LF
ANXA11
DCBLD1
PPP4R4
SPNS3
LDLRAP1
FMO4
FGFR3
TRIB1
MEI1
ACTA2
UNC13D
STAB2
PLK3
KCNH3
RGS11
SORL1
PREX1
SMIM2-AS1
CD300A
CCDC158
ADPRH
CD244
PURA
CSF3R
HMOX1
STAT3
TTC34
PAXIP1-AS2
FTCDNL1
DDX60
PPP1R13L
ADIRF-AS1
ARHGEF26
AJAP1
TMEM132E
TMEM184A
SUSD2
CA10
LINC00240
LINC00996
S1PR1
IL10
SERTAD1
IFIT1
ADCY7
CRYGN
SLITRK4
SCN2B
SCN1B
SWAP70
KLHL2
FZD6
LPIN3
GATA3
PXDC1
CRHBP
UNGP3
OAS3
SLC39A11
COBL
DOK2
PLEKHA7
GHR
TREM1
MYO5C
GK
KLF8
ENPEP
RASGEF1B
CBLC
PHF11
STON2
PCOLCE2
GYG1
AP1S3
FBXO6
ABHD15
ST8SIA6
TRPV2
P2RY1
SLC4A11
TUBA4A
FAM107A
NMUR1
EHBP1L1
ITPR3
NRGN
CRIP1
CTBS
ELF1
DNAJC15
HYAL1
ATP1B2
ITM2B
LINC00607
SLC12A8
OSCAR
CCDC159
SLC16A12
ABCA9
RET
RAB37
CDC42EP1
RIPK3
HHEX
NAIP
RBP5
SLC45A1
SLC4A1
PIK3R6
GCLM
SAT1
NCMAP
LRRN2
SLC17A9
