# Supplementary material for: Novel epigenetic signature, molecular subtypes and insights into IGF2/H19 dysregulation in Wilms tumour revealed by methylomic and transcriptomic profiling
Source: Research Square preprint supplement (doi:10.21203/rs.3.rs-8030860/v1), 2025-11-11
Supplement: Supplementary file 11 [file e149e7fff50487a9b2444f5b.xlsx]

## Sheet: Table S11_COSMIC ncDEGs
Gene.Symbol	Status (NNK vs WT)	Role.in.Cancer	Subtype-specific gene template
ALDH2	Down-Hyper	fusion	na
ARHGEF10L	Down-Hyper	TSG	na
ATP1A1	Down-Hyper	oncogene, TSG	na
CBLC	Down-Hyper	na	Subtype1
CDH1	Down-Hyper	TSG	Subtype1
EPAS1	Down-Hyper	oncogene, TSG	Subtype1
ERBB2	Down-Hyper	oncogene, fusion	na
EZR	Down-Hyper	fusion	na
FGFR4	Down-Hyper	oncogene	na
HNF1A	Down-Hyper	TSG	na
IDH2	Down-Hyper	oncogene	na
LRP1B	Down-Hypo	TSG	Subtype1
MET	Down-Hyper	oncogene	na
NDRG1	Down-Hyper	TSG, fusion	Subtype1
PAX8	Down-Hyper	fusion	Subtype3
PER1	Down-Hyper	TSG, fusion	na
RNF43	Down-Hyper	TSG	na
SDHB	Down-Hyper	TSG	na
TAL1	Down-Hyper	oncogene, fusion	Subtype1
TMPRSS2	Down-Hyper	fusion	Subtype1
AFF3	Up-Hypo	oncogene, fusion	Subtype3
AXIN2	Up-Hypo	TSG	na
BRCA1	Up-Hypo	TSG	Subtype3
CCND2	Up-Hypo	oncogene, fusion	na
CCNE1	Up-Hyper	oncogene	Subtype3
CD28	Up-Hypo	oncogene	Subtype1
CDH11	Up-Hypo	TSG, fusion	na
CDK6	Up-Hypo	oncogene, fusion	na
CNTNAP2	Up-Hypo	TSG	Subtype3
COL3A1	Up-Hypo	fusion	Subtype2
CSF1R	Up-Hypo	oncogene	Subtype1
EPHA3	Up-Hypo	na	na
ETV1	Up-Hypo	oncogene, fusion	Subtype3
ETV5	Up-Hypo	oncogene, fusion	Subtype3
FGFR1	Up-Hypo	oncogene, fusion	na
GAS7	Up-Hypo	fusion	na
GRIN2A	Up-Hyper	TSG	Subtype3
JAZF1	Up-Hypo	fusion	Subtype1
LCP1	Up-Hypo	fusion	Subtype1
LEF1	Up-Hypo	oncogene, TSG	na
N4BP2	Up-Hypo	TSG	na
NR2F2	Up-Hypo	na	na
RUNX1	Up-Hypo	oncogene, TSG, fusion	Subtype1
TBL1XR1	Up-Hyper	oncogene, TSG, fusion	na
TCF3	Up-Hypo	oncogene, TSG, fusion	Subtype3
TET1	Up-Hypo	oncogene, TSG, fusion	na
ZNF521	Up-Hypo	oncogene, fusion	Subtype3
ncDEGs	negatively correlated Differentially Expressed Genes
TSG	Tumour Suppressor Gene
na	Not assigned
